# Supplementary material for: Tuning the reduction potentials of benzoquinone through the coordination to Lewis acids
Source: Royal Society of Chemistry journal article supplement (doi:10.1039/d1cp01266e), 2021-01-01
Supplement: d1cp01266e1.pdf [file d1cp01266e1.pdf]

# Tuning the Reduction Potentials of Benzoquinone Through the Coordination to Lewis Acids

Brena L. Thompson and Zachariah M. Heiden\*

Department of Chemistry, Washington State University  
Pullman, Washington 99164  
zachariah.heiden@wsu.edu

## Supporting Information

### Index

|     |                                                                                                                                                                                                                                                                        |      |
|-----|------------------------------------------------------------------------------------------------------------------------------------------------------------------------------------------------------------------------------------------------------------------------|------|
| 1)  | Plots of Influence of Lewis Acid Strength on the Reduction Potentials of Benzoquinone-Lewis Acid Adducts                                                                                                                                                               | S2   |
| 2)  | Plot of Free Energies for the Binding of <b>Q</b> , <b>[Q]<sup>-</sup></b> , and <b>[Q]<sup>2-</sup></b> to Lewis Acids of Varying Strengths                                                                                                                           | S11  |
| 3)  | Plot of Free Energies for the Binding of <b>Q</b> , <b>[Q]<sup>-</sup></b> , and <b>[Q]<sup>2-</sup></b> to Two Lewis Acids of Varying Strengths                                                                                                                       | S12  |
| 4)  | Plot of Free Energies for the Binding of <b>[HQ]<sup>+</sup></b> , <b>[HQ]<sup>•</sup></b> , and <b>[HQ]<sup>-</sup></b> to Lewis Acids of Varying Strengths                                                                                                           | S14  |
| 5)  | Plot of Aromaticity of <b>LA<sub>1</sub>-Q</b> , <b>[LA<sub>1</sub>-Q]<sup>-</sup></b> , and <b>[LA<sub>1</sub>-Q]<sup>2-</sup></b>                                                                                                                                    | S15  |
| 6)  | Plots of Frontier Molecular Energies of <b>LA<sub>1</sub>-Q</b> , <b>LA<sub>1</sub>-Q-LA<sub>2</sub></b> , <b>B(C<sub>6</sub>F<sub>5</sub>)<sub>3</sub>-Q-LA<sub>2</sub></b> , and <b>[LA<sub>1</sub>-HQ]<sup>+</sup></b>                                              | S16  |
| 7)  | Plots of Frontier Molecular Energies of <b>[LA<sub>1</sub>-Q]<sup>2-</sup></b> , <b>[LA<sub>1</sub>-Q-LA<sub>2</sub>]<sup>2-</sup></b> , <b>[B(C<sub>6</sub>F<sub>5</sub>)<sub>3</sub>-Q-LA<sub>2</sub>]<sup>2-</sup></b> , and <b>[LA<sub>1</sub>-HQ]<sup>-</sup></b> | S20  |
| 8)  | Plots of the Influence of Lewis Acid Strength on the Ability to Transfer H-atoms and Hydrides from <b>[LA<sub>1</sub>-HQ]<sup>•</sup></b> and <b>[LA<sub>1</sub>-HQ]<sup>-</sup></b>                                                                                   | S24  |
| 9)  | Computed $\Delta G_{H^-}$ values of Lewis Acids                                                                                                                                                                                                                        | S27  |
| 10) | Computed Free Energy of Formation of Acetonitrile-Lewis Acid Adducts                                                                                                                                                                                                   | S27  |
| 11) | Computed Free Energies of Formation for Lewis Acid- <b>Q/[Q]<sup>-</sup>/[Q]<sup>2-</sup></b> Adducts                                                                                                                                                                  | S28  |
| 12) | Computed Reduction Potentials for Lewis Acid- <b>Q/[Q]<sup>-</sup></b> Adducts                                                                                                                                                                                         | S32  |
| 13) | Energies for Computed Structures                                                                                                                                                                                                                                       | S36  |
| 14) | Sample Calculation of Redox Potential for Benzoquinone                                                                                                                                                                                                                 | S41  |
| 15) | Sample Calculation of $pK_a$ for Protonated Benzoquinone                                                                                                                                                                                                               | S42  |
| 16) | Sample Calculation of the Ability to transfer a Hydrogen Atom from Protonated Semiquinone                                                                                                                                                                              | S44  |
| 17) | Plots Showing the Locations of the Frontier Molecular Orbitals                                                                                                                                                                                                         | S45  |
| 18) | Plots Showing the Locations of the Unpaired Spin Densities                                                                                                                                                                                                             | S68  |
| 19) | 3D Coordinates of All Computed Structures                                                                                                                                                                                                                              | S83  |
| 20) | References                                                                                                                                                                                                                                                             | S153 |

1) Plots of Influence of Lewis Acid Strength on the Reduction Potentials of Benzoquinone-Lewis Acid Adducts

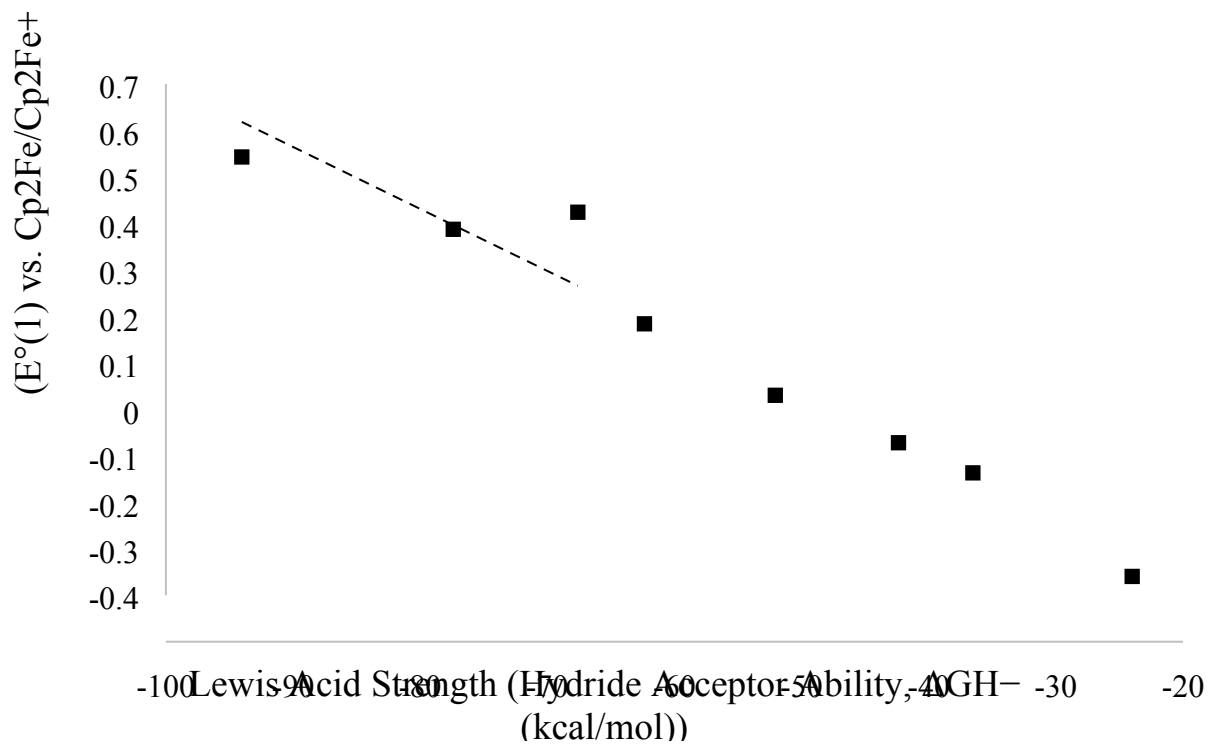

**Figure S1.** Plot showing the computed first reduction potential ( $E^\circ(3)$ ) of  $LA_1-Q$  as the Lewis acid strength is varied.

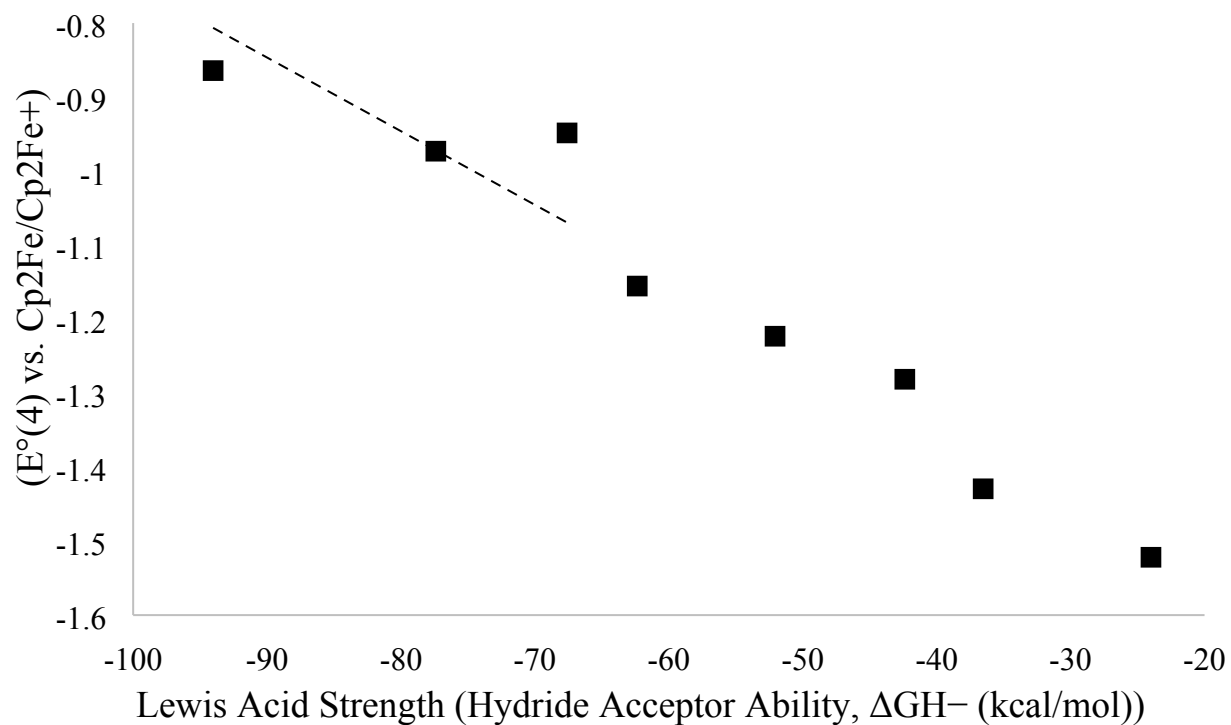

**Figure S2.** Plot showing the computed second reduction potential ( $E^\circ(4)$ ) of **LA<sub>1</sub>-Q** as the Lewis acid strength is varied.

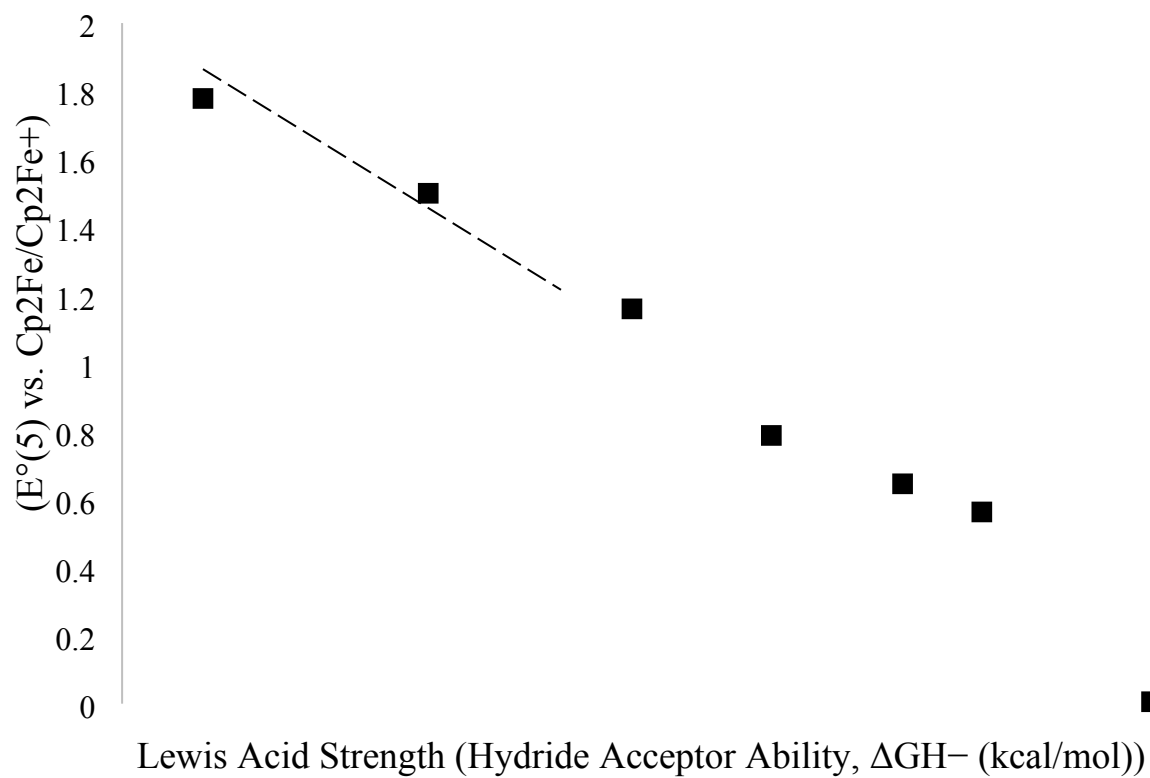

**Figure S3.** Plot showing the computed first reduction potential ( $E^\circ(5)$ ) of  $LA_1$ -Q- $LA_2$ , where  $LA_1 = LA_2$ , as the Lewis acid strength is varied.

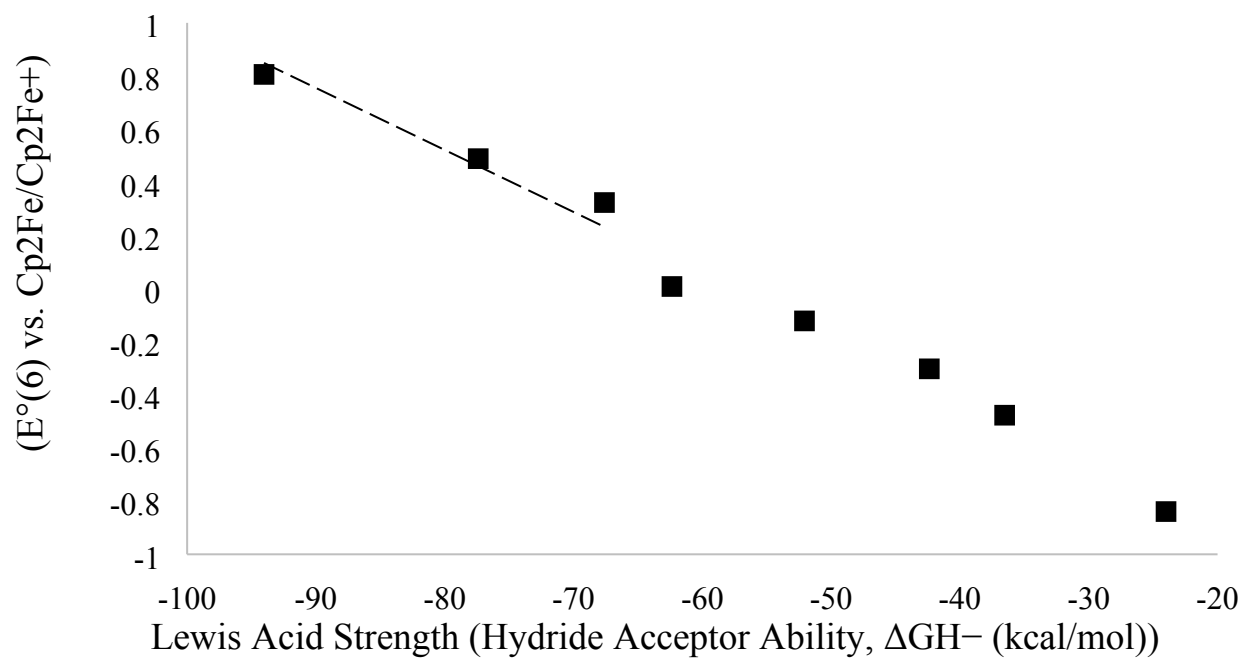

**Figure S4.** Plot showing the computed second reduction potential ( $E^\circ(6)$ ) of  $LA_1-Q-LA_2$ , where  $LA_1 = LA_2$ , as the Lewis acid strength is varied.

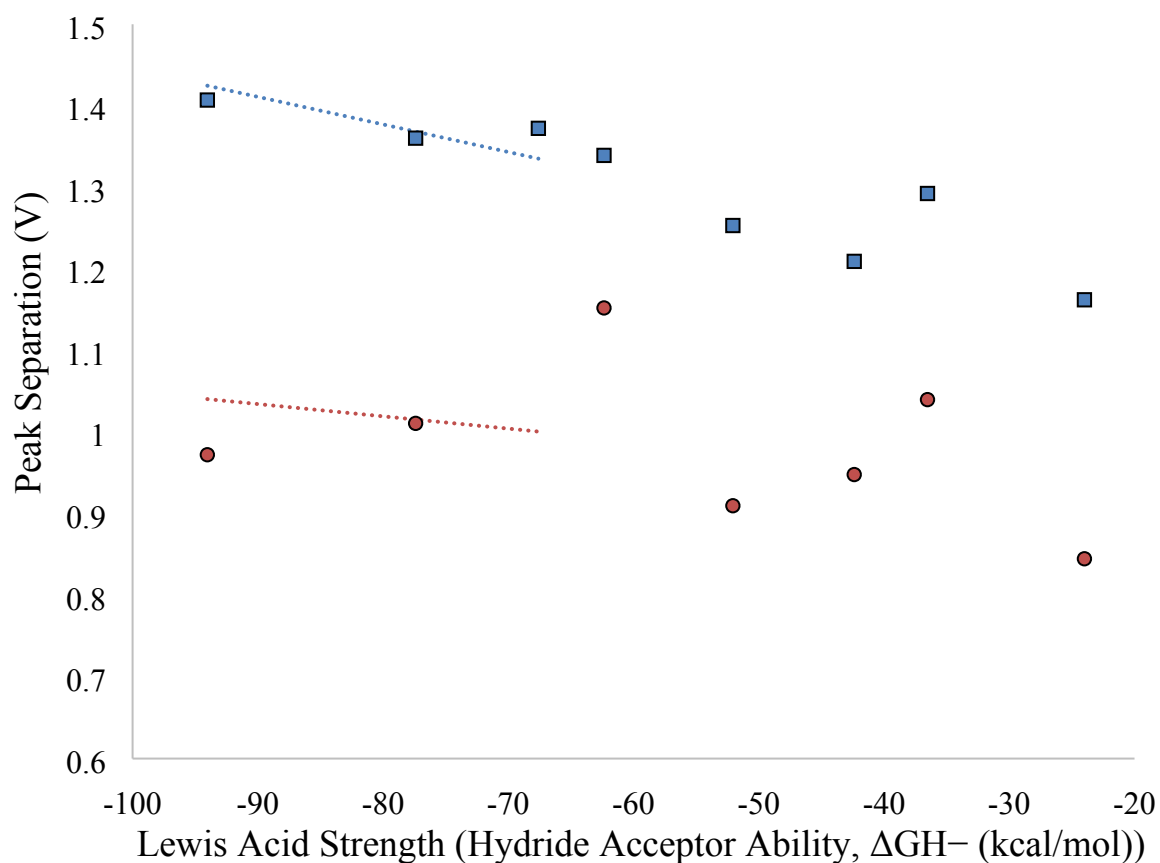

**Figure S5.** Plot showing the effect of Lewis acid strength on the difference between the first ( $E^\circ(3)$  for  $LA_1-Q$  and  $E^\circ(5)$  for  $LA_1-Q-LA_2$ ) and second reduction potential ( $E^\circ(4)$  for  $LA_1-Q$  and  $E^\circ(6)$  for  $LA_1-Q-LA_2$ ) of **Q**. The blue squares indicate the difference between  $E^\circ(3)$  and  $E^\circ(4)$  for  $LA_1-Q$  and the red circles indicate the difference between  $E^\circ(5)$  and  $E^\circ(6)$  for  $LA_1-Q-LA_2$ , where  $LA_1 = LA_2$ .

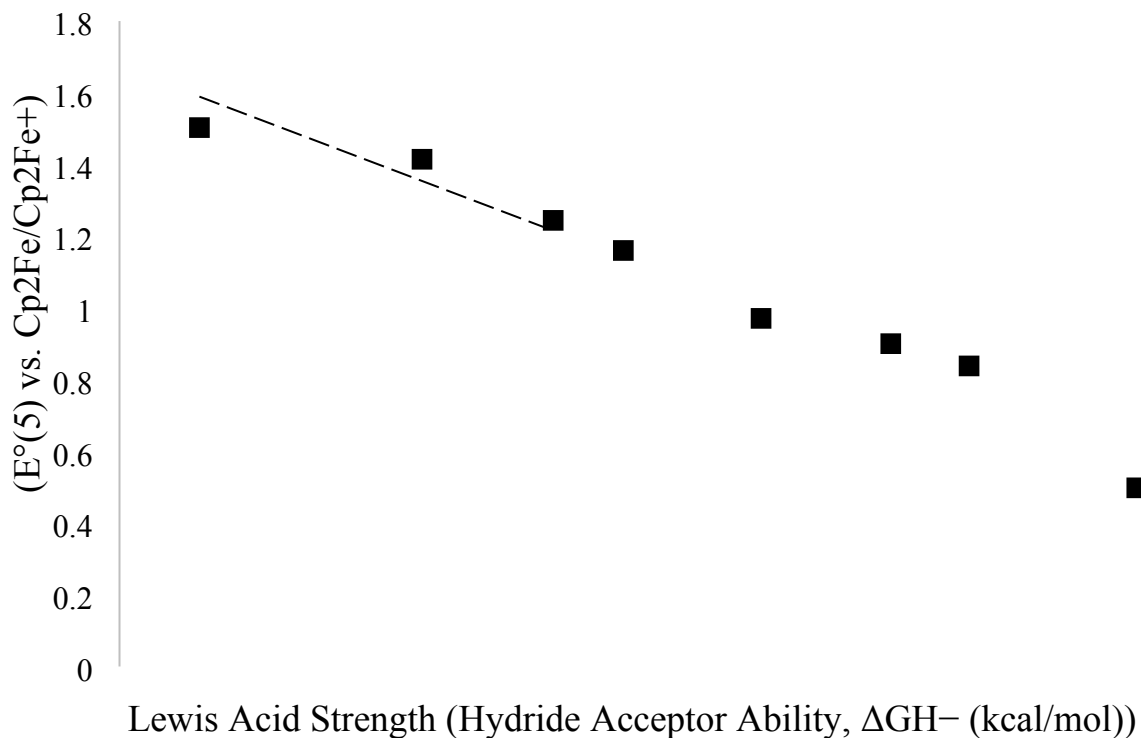

**Figure S6.** Plot showing the computed first reduction potential ( $E^\circ(5)$ ) of  $LA_1\text{-Q-LA}_2$ , where  $LA_1 = B(C_6F_5)_3$ , as the Lewis acid strength is varied.

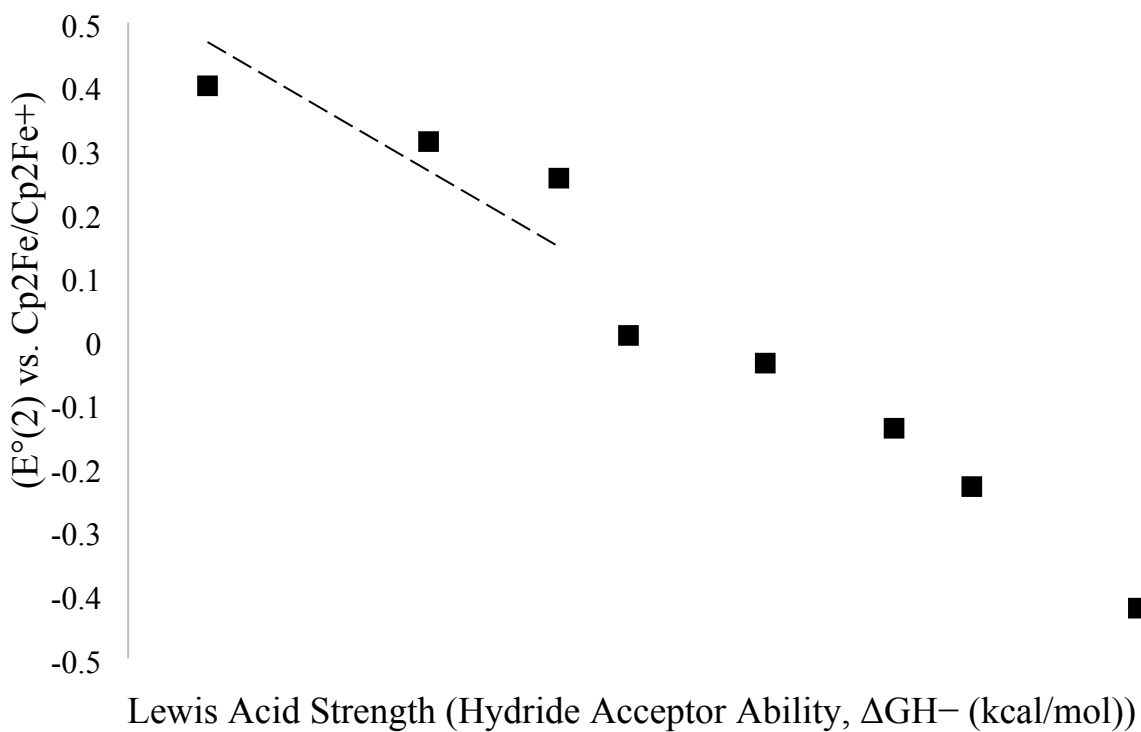

**Figure S7.** Plot showing the computed second reduction potential ( $E^\circ(6)$ ) of **LA<sub>1</sub>-Q-LA<sub>2</sub>**, where **LA<sub>1</sub>** = B(C<sub>6</sub>F<sub>5</sub>)<sub>3</sub>, as the Lewis acid strength is varied.



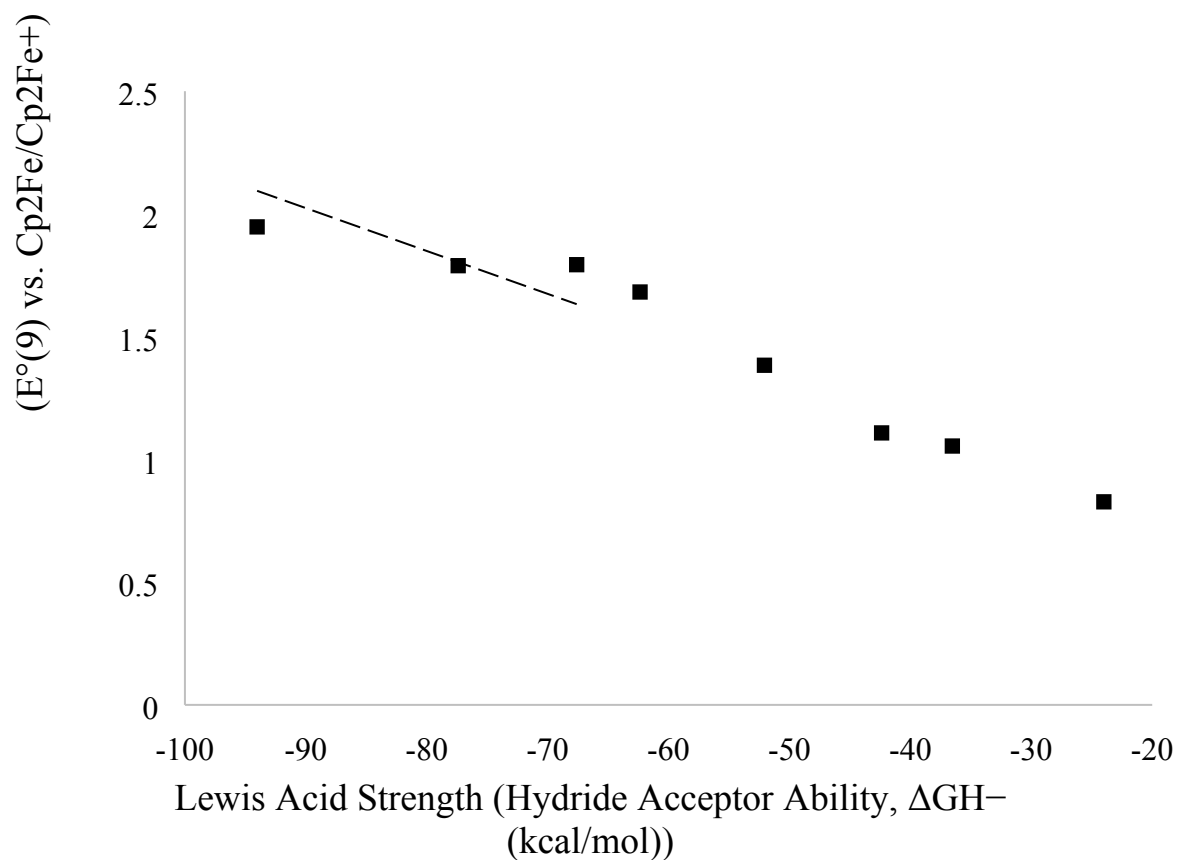

**Figure S8.** Plot showing the computed first reduction potential ( $E^\circ(9)$ ) of  $[\text{LA}_1\text{-HQ}]^+$  as the Lewis acid strength is varied.

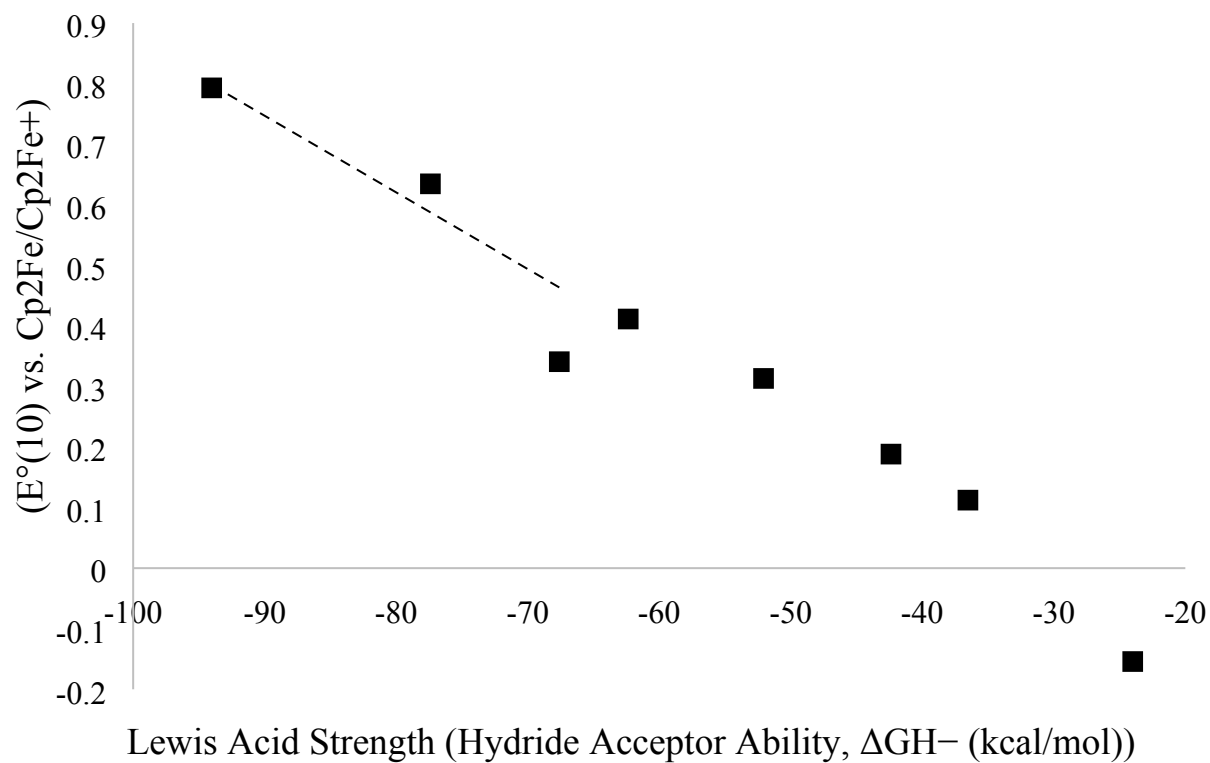

**Figure S9.** Plot showing the computed second reduction potential ( $E^\circ(10)$ ) of  $[\text{LA}_1\text{-HQ}]^+$  as the Lewis acid strength is varied.

2) Plot of Free Energies for the Binding of **Q**,  $[\mathbf{Q}]^-$ , and  $[\mathbf{Q}]^{2-}$  to Lewis Acids of Varying Strengths

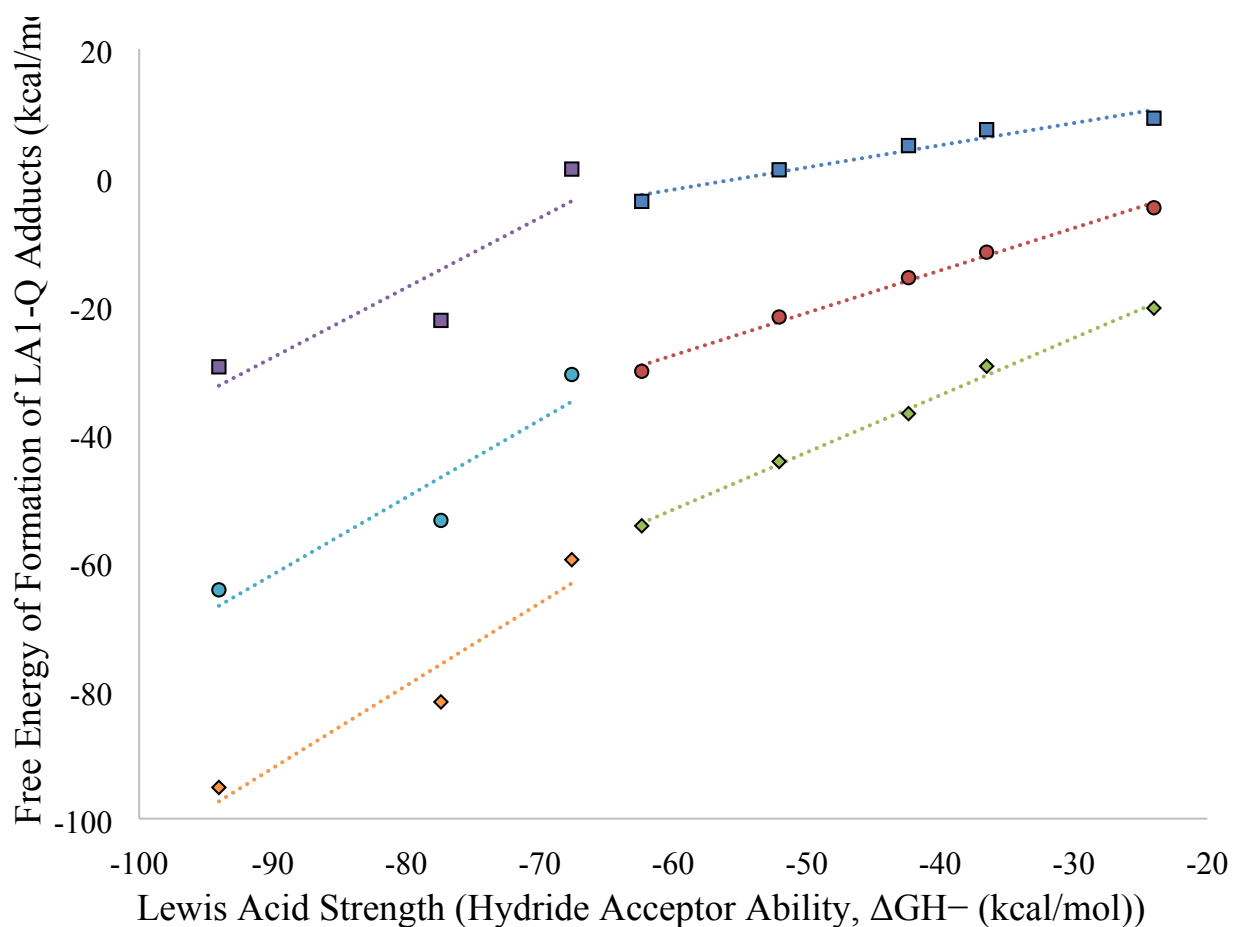

**Figure S10.** Plot showing the effect of Lewis acid strength on the binding of **Q** to a Lewis acid ( $\Delta G_1$ ), where the purple squares represent silicon-based Lewis acids and the blue squares represent boron-based Lewis acids. The light blue and red circles represent the effect of Lewis acid strength on the binding of  $[\mathbf{Q}]^-$  to a Lewis acid ( $\Delta G_2$ ) for silicon-based and boron-based Lewis acids, respectively. The orange and light green diamonds represent the effect of Lewis acid strength on the binding of  $[\mathbf{Q}]^{2-}$  to a Lewis acid ( $\Delta G_3$ ) for silicon-based and boron-based Lewis acids, respectively.

3) Plot of Free Energies for the Binding of Q, [Q]<sup>-</sup>, and [Q]<sup>2-</sup> to Two Lewis Acids of Varying Strengths

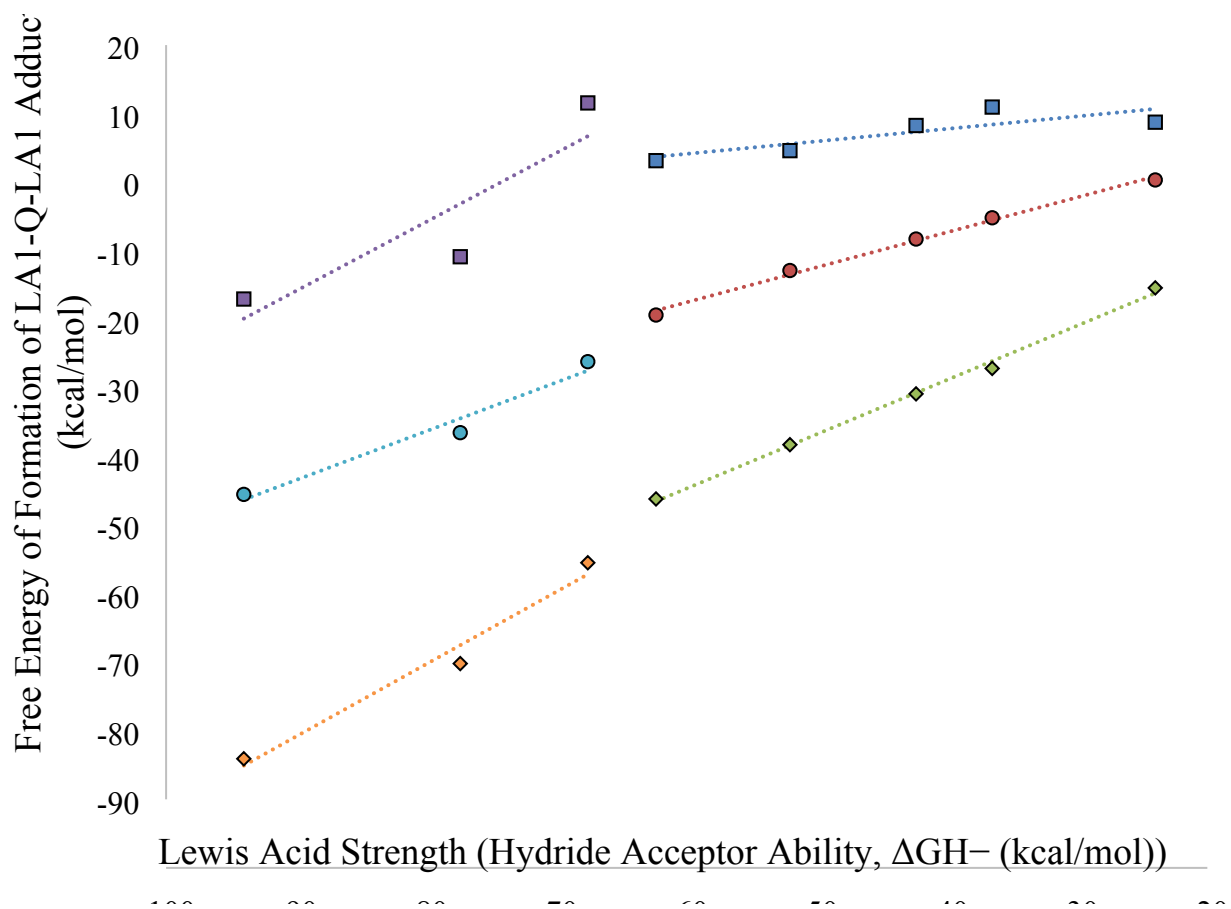

**Figure S11.** Plot showing the effect of Lewis acid strength on the binding of  $\text{LA}_1\text{-Q}$  to a Lewis acid ( $\Delta G_4$ ), where the purple squares represent silicon-based Lewis acids and the blue squares represent boron-based Lewis acids. The light blue and red circles represent the effect of Lewis acid strength on the binding of  $[\text{LA}_1\text{-Q}]^-$  to a Lewis acid ( $\Delta G_5$ ) for silicon-based and boron-based Lewis acids, respectively. The orange and light green diamonds represent the effect of Lewis acid strength on the binding of  $[\text{LA}_1\text{-Q}]^{2-}$  to a Lewis acid ( $\Delta G_6$ ) for silicon-based and boron-based Lewis acids, respectively.

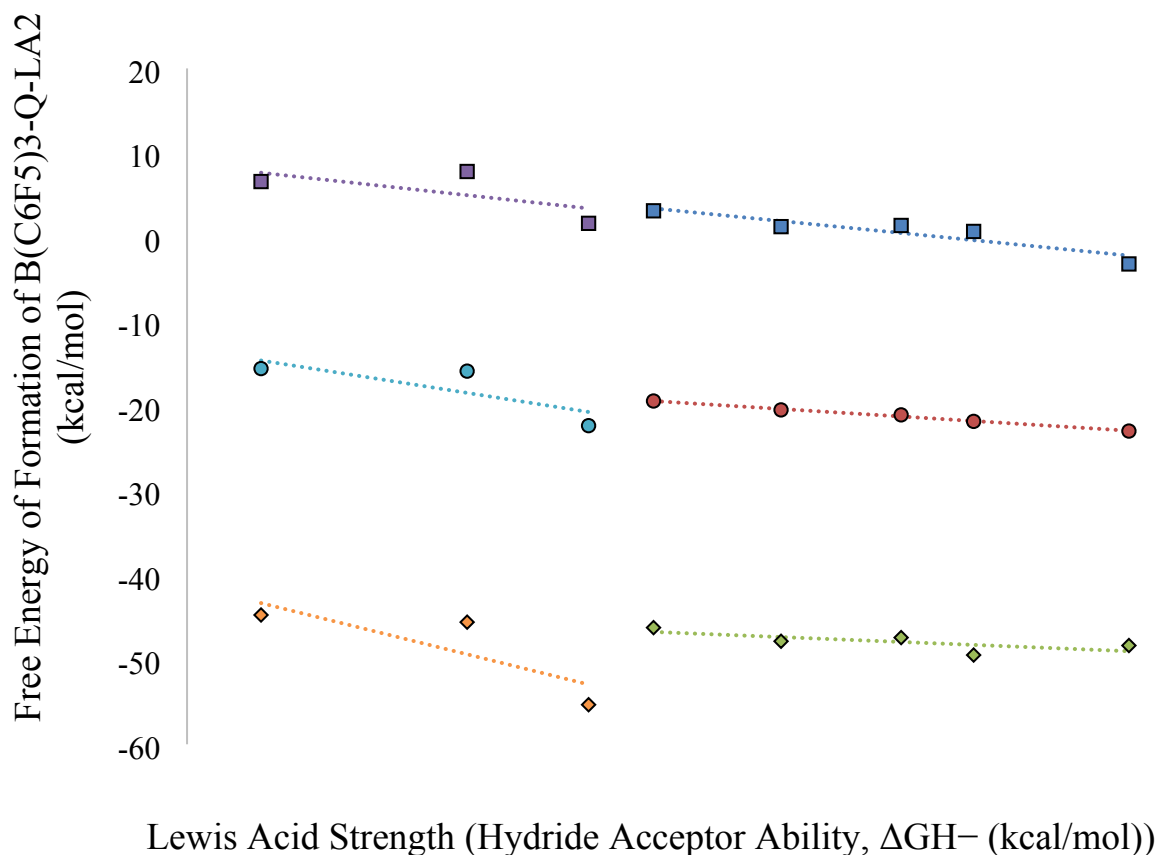

**Figure S12.** Plot showing the effect of Lewis acid strength on the binding of  $B(C_6F_5)_3-Q$  to a Lewis acid ( $\Delta G_4$ ), where the purple squares represent silicon-based Lewis acids and the blue squares represent boron-based Lewis acids. The light blue and red circles represent the effect of Lewis acid strength on the binding of  $[B(C_6F_5)_3-Q]^-$  to a Lewis acid ( $\Delta G_5$ ) for silicon-based and boron-based Lewis acids, respectively. The orange and light green diamonds represent the effect of Lewis acid strength on the binding of  $[B(C_6F_5)_3-Q]^{2-}$  to a Lewis acid ( $\Delta G_6$ ) for silicon-based and boron-based Lewis acids, respectively.

4) Plot of Free Energies for the Binding of  $[\text{HQ}]^+$ ,  $[\text{HQ}]^{\cdot}$ , and  $[\text{HQ}]^-$  to Lewis Acids of Varying Strengths

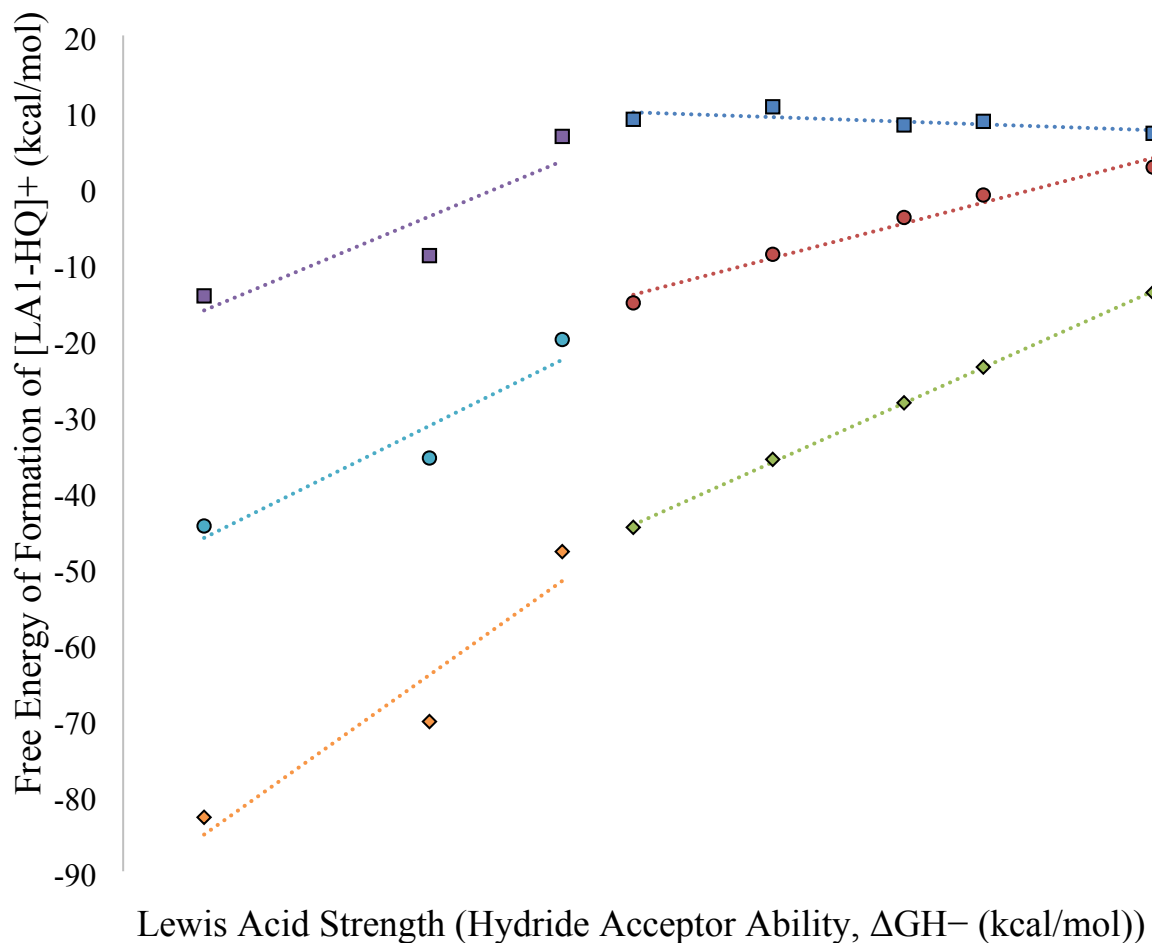

**Figure S13.** Plot showing the effect of Lewis acid strength on the binding of  $[\text{HQ}]^+$  to a Lewis acid ( $\Delta\text{G}_7$ ), where the purple squares represent silicon-based Lewis acids and the blue squares represent boron-based Lewis acids. The light blue and red circles represent the effect of Lewis acid strength on the binding of  $[\text{HQ}]^{\cdot}$  to a Lewis acid ( $\Delta\text{G}_8$ ) for silicon-based and boron-based Lewis acids, respectively. The orange and light green diamonds represent the effect of Lewis acid strength on the binding of  $[\text{HQ}]^-$  to a Lewis acid ( $\Delta\text{G}_9$ ) for silicon-based and boron-based Lewis acids, respectively.

5) Plot of Aromaticity of  $\text{LA}_1\text{-Q}$ ,  $[\text{LA}_1\text{-Q}]^-$ , and  $[\text{LA}_1\text{-Q}]^{2-}$ 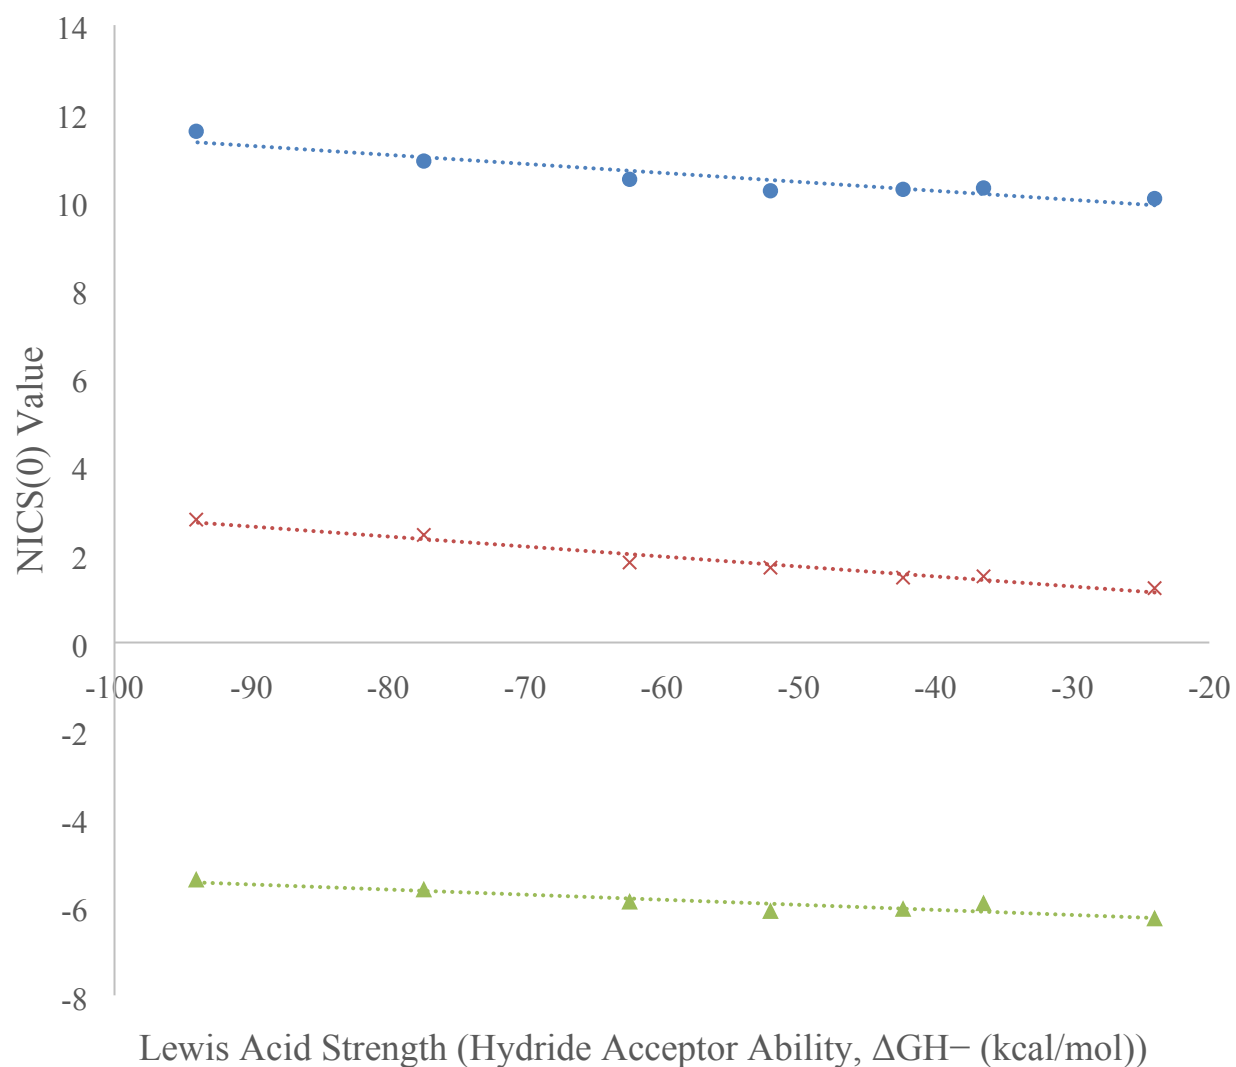

**Figure S14.** Plot showing the effect of Lewis acid strength on the aromaticity of **Q** (blue circles),  $[\text{Q}]^-$  (red squares), and  $[\text{Q}]^{2-}$  (light green triangles), through the computation of a NICS(0) value. A more negative value indicates a greater degree of aromaticity.

6) Plots of Frontier Molecular Energies of  $\text{LA}_1\text{-Q}$ ,  $\text{LA}_1\text{-Q-LA}_1$ ,  $\text{B}(\text{C}_6\text{F}_5)_3\text{-Q-LA}_2$ , and  $[\text{LA}_1\text{-HQ}]^+$

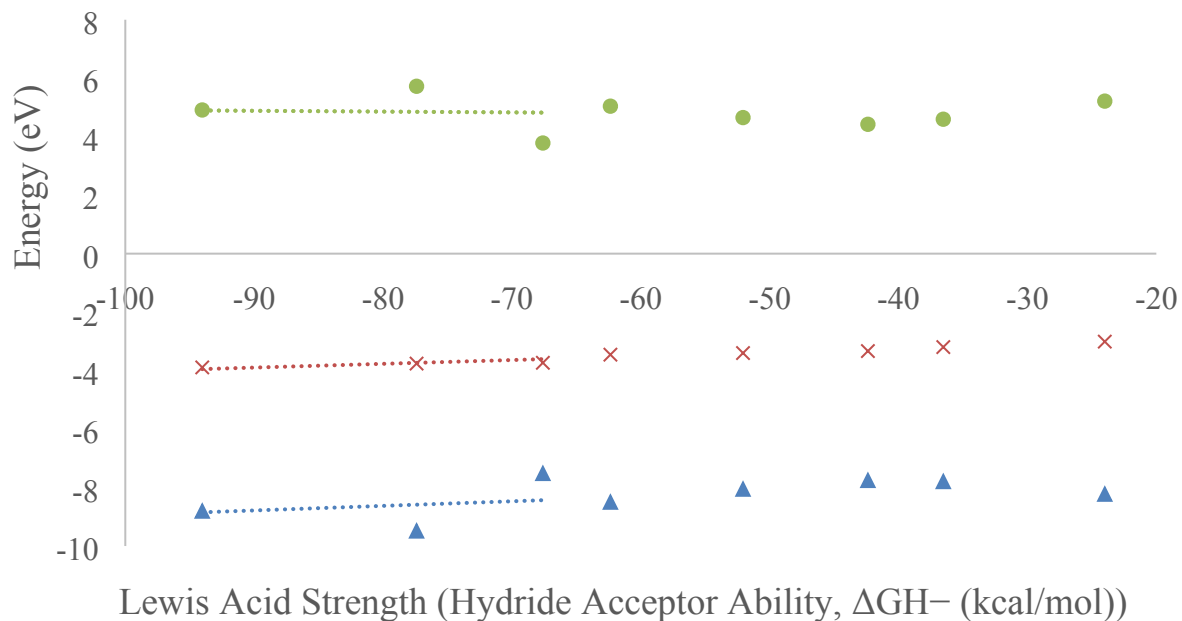

**Figure S15.** Plot showing the effect of Lewis acid strength on the energy of the HOMO (blue triangles), LUMO (red squares), and HOMO-LUMO gap (light green circles) of  $\text{LA}_1\text{-Q}$ .



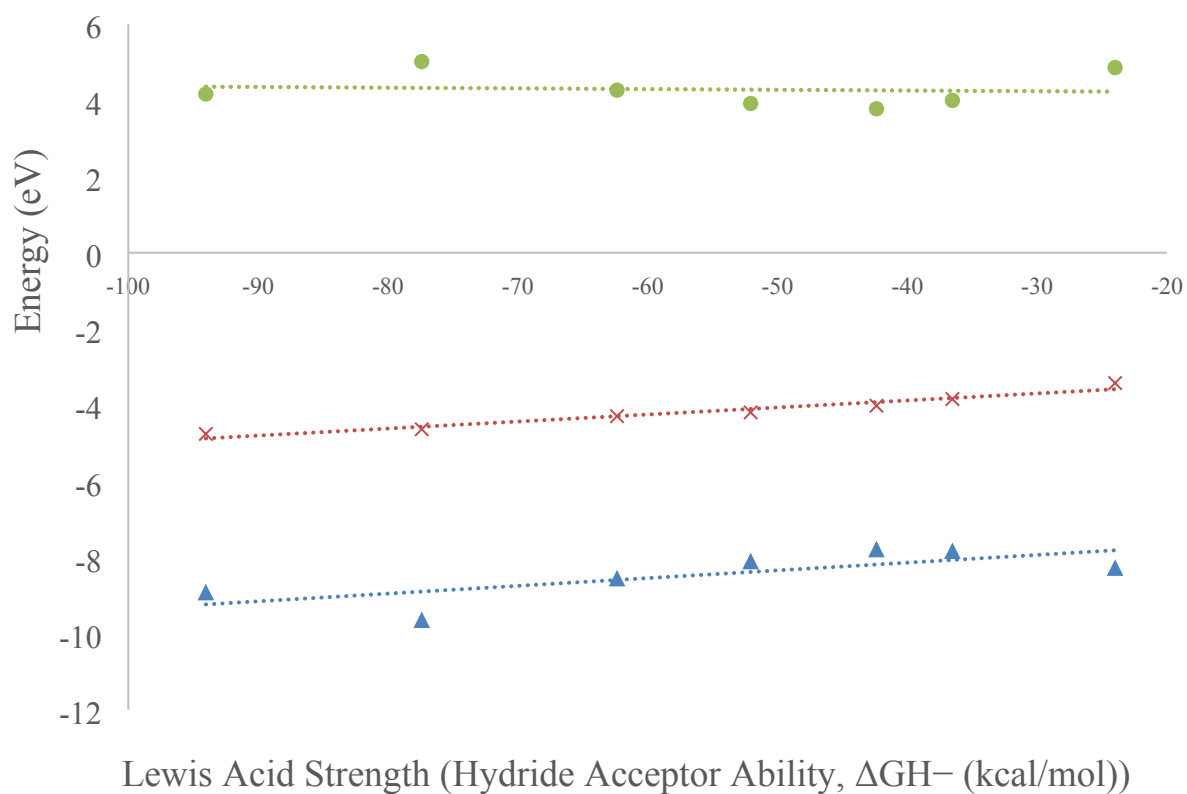

**Figure S16.** Plot showing the effect of Lewis acid strength on the energy of the HOMO (blue triangles), LUMO (red squares), and HOMO-LUMO gap (light green circles) of **LA<sub>1</sub>-Q-LA<sub>1</sub>**.

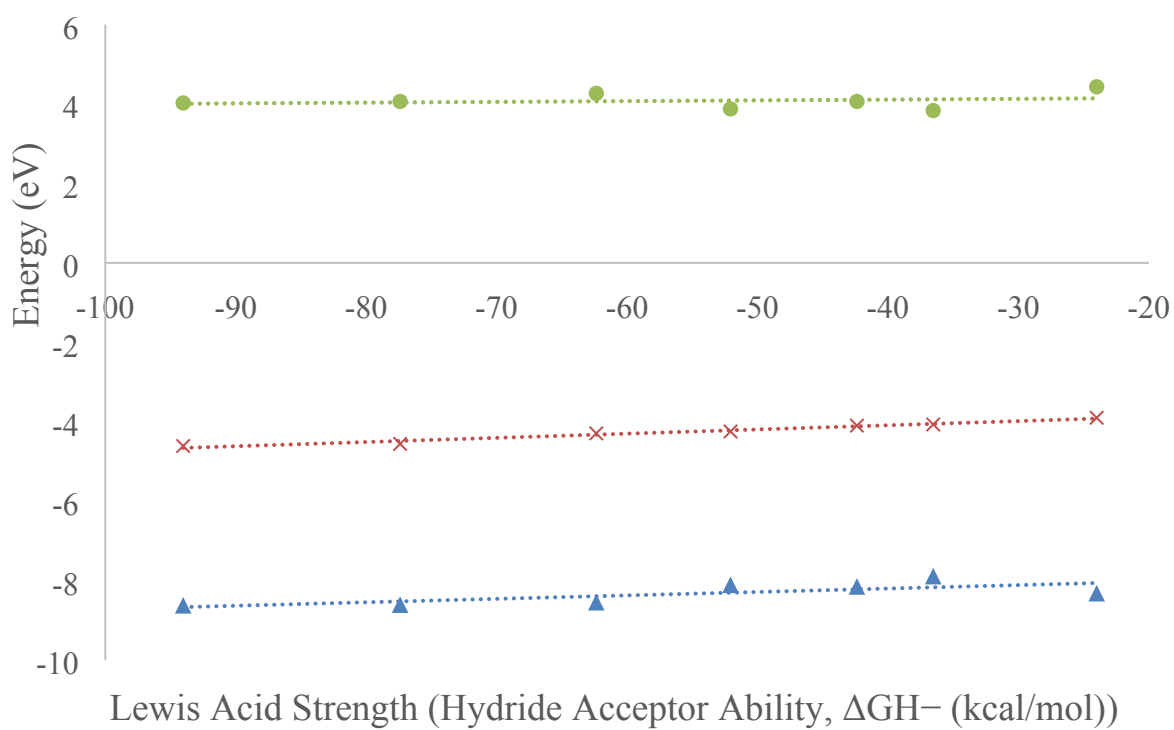

**Figure S17.** Plot showing the effect of Lewis acid strength on the energy of the HOMO (blue triangles), LUMO (red squares), and HOMO-LUMO gap (light green circles) of  $B(C_6F_5)_3-Q-LA_2$ .

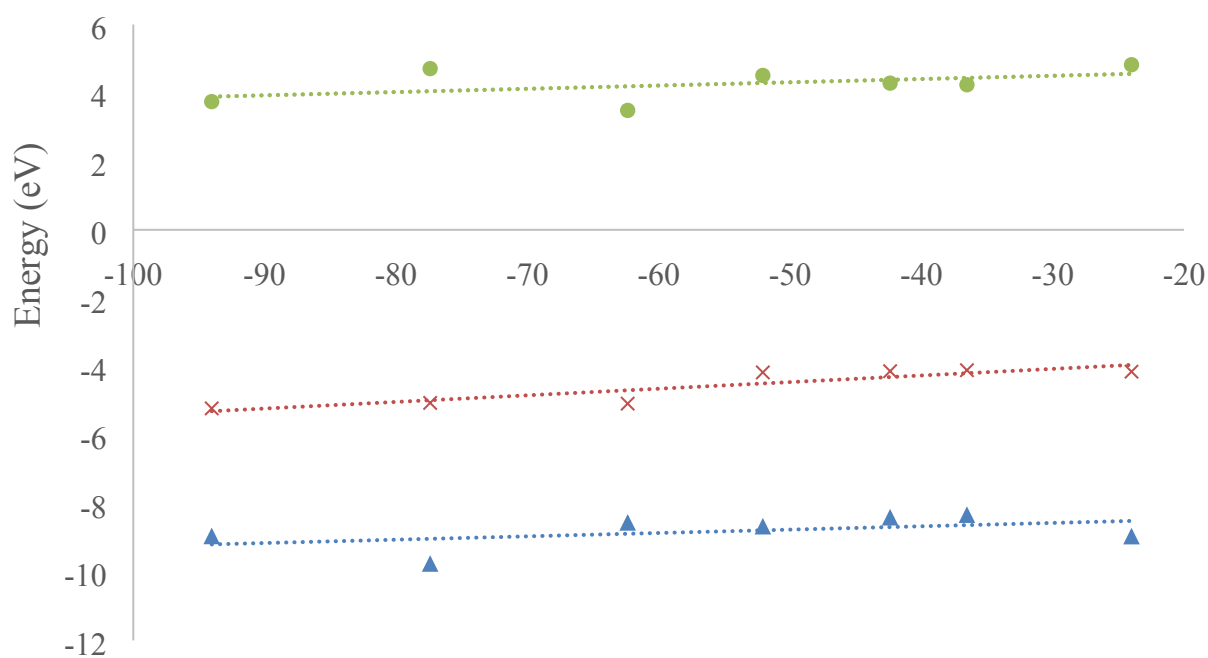

Lewis Acid Strength (Hydride Acceptor Ability,  $\Delta GH^-$  (kcal/mol))

**Figure S18.** Plot showing the effect of Lewis acid strength on the energy of the HOMO (blue triangles), LUMO (red squares), and HOMO-LUMO gap (light green circles) of  $[LA_1-HQ]^+$ .

7) Plots of Frontier Molecular Energies of  $[\text{LA}_1\text{-Q}]^{2-}$ ,  $[\text{LA}_1\text{-Q-LA}_1]^{2-}$ ,  $[\text{B}(\text{C}_6\text{F}_5)_3\text{-Q-LA}_2]^{2-}$ , and  $[\text{LA}_1\text{-HQ}]^-$

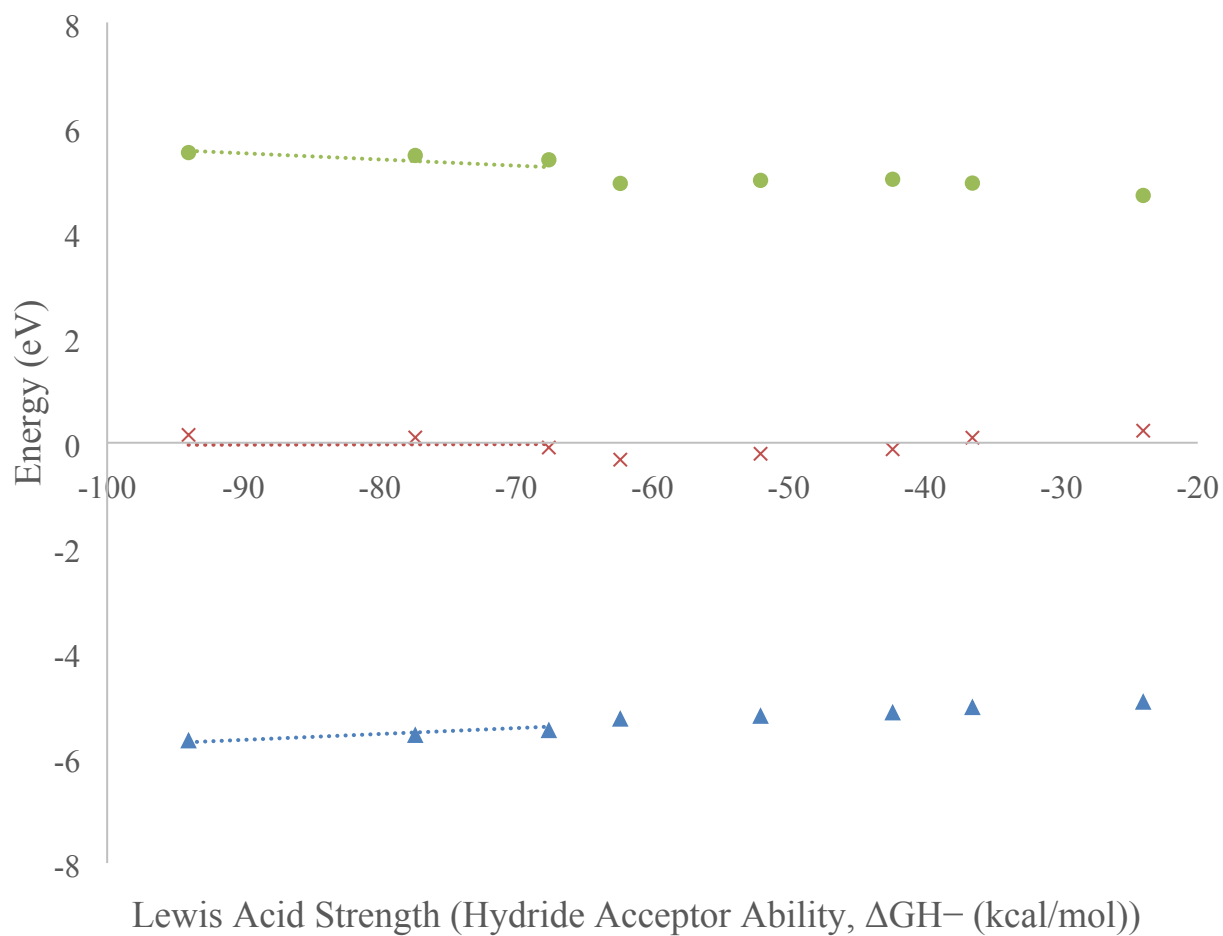

**Figure S19.** Plot showing the effect of Lewis acid strength on the energy of the HOMO (blue triangles), LUMO (red squares), and HOMO-LUMO gap (light green circles) of  $[\text{LA}_1\text{-Q}]^{2-}$ .

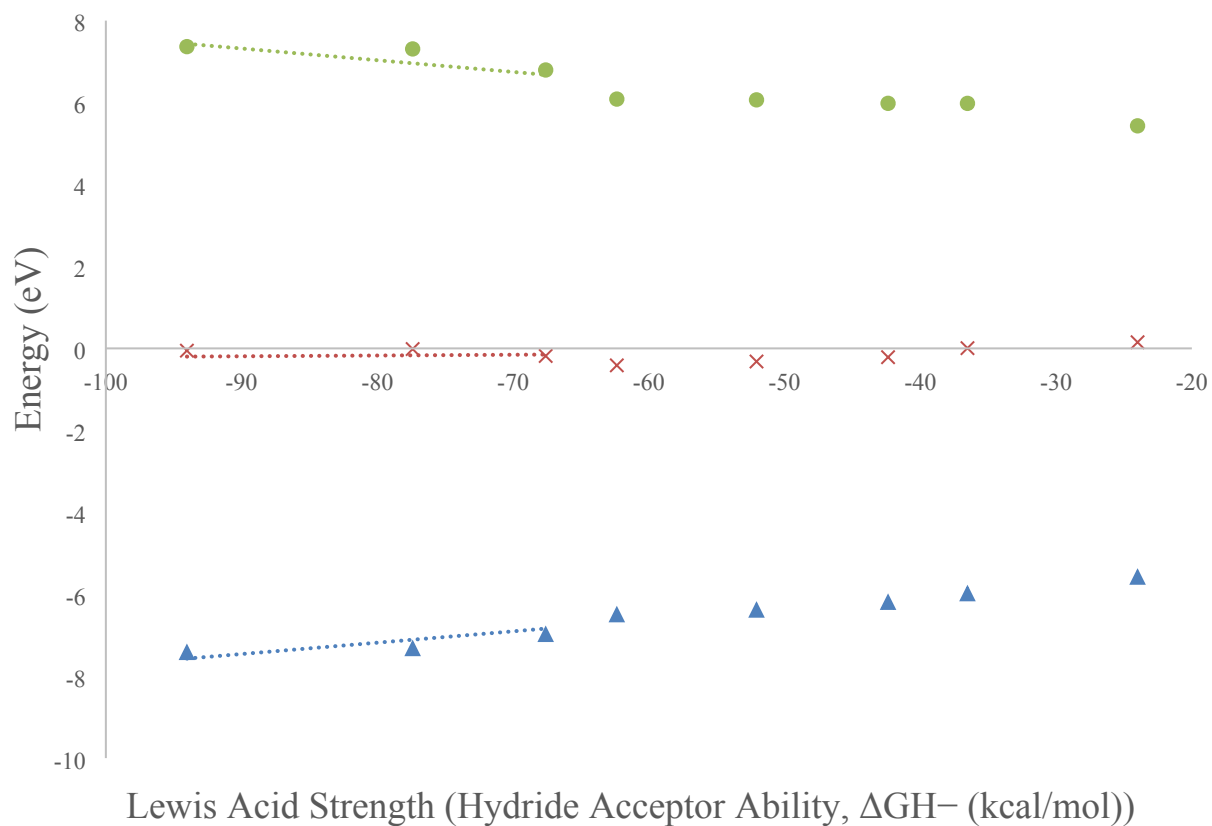

**Figure S20.** Plot showing the effect of Lewis acid strength on the energy of the HOMO (blue triangles), LUMO (red squares), and HOMO-LUMO gap (light green circles) of  $[LA_1-Q-LA_1]^{2-}$ .

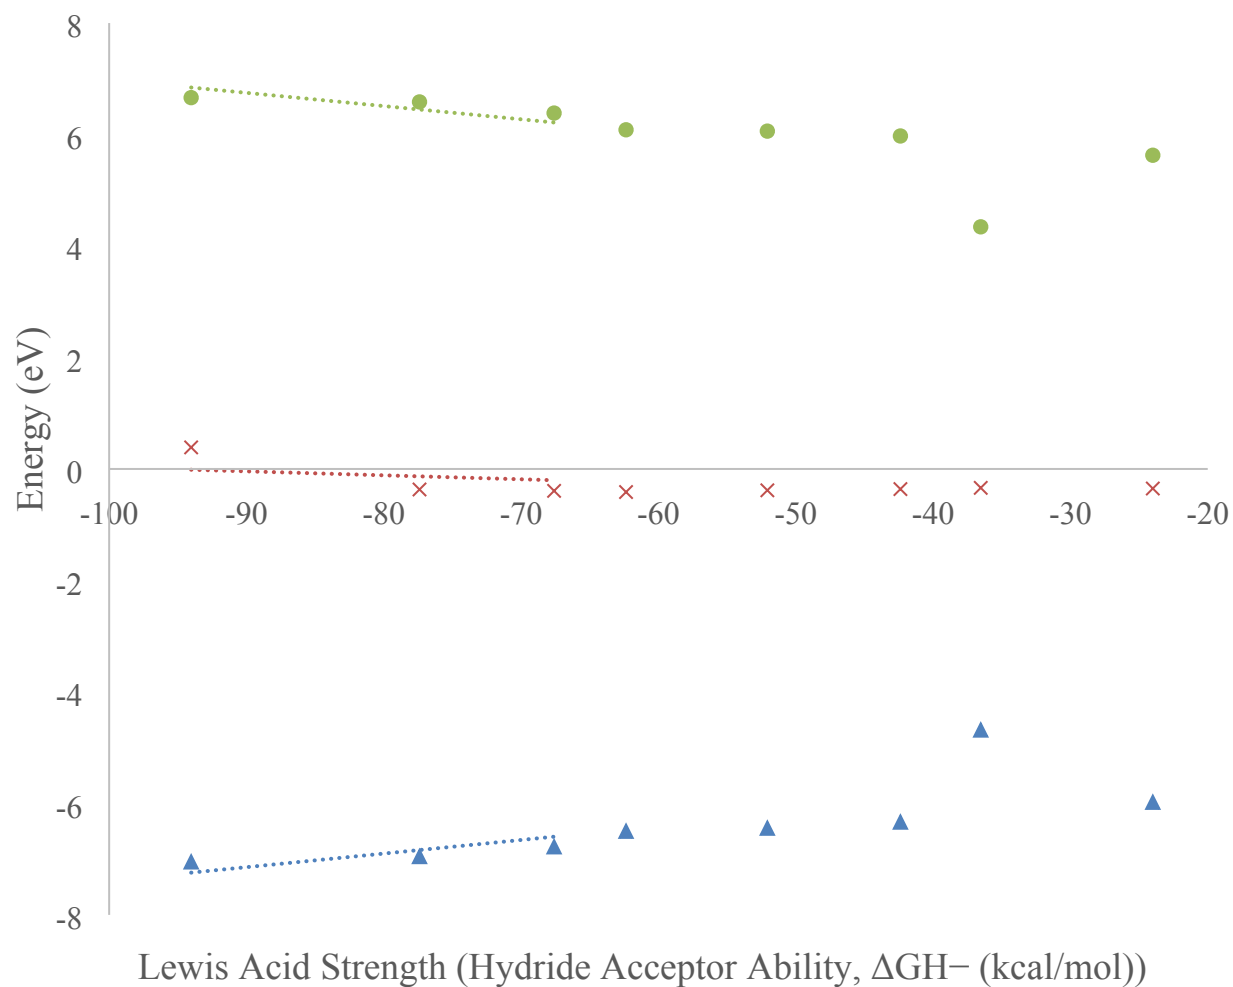

**Figure S21.** Plot showing the effect of Lewis acid strength on the energy of the HOMO (blue triangles), LUMO (red squares), and HOMO-LUMO gap (light green circles) of  $[B(C_6F_5)_3-Q-LA_2]^{2-}$ .

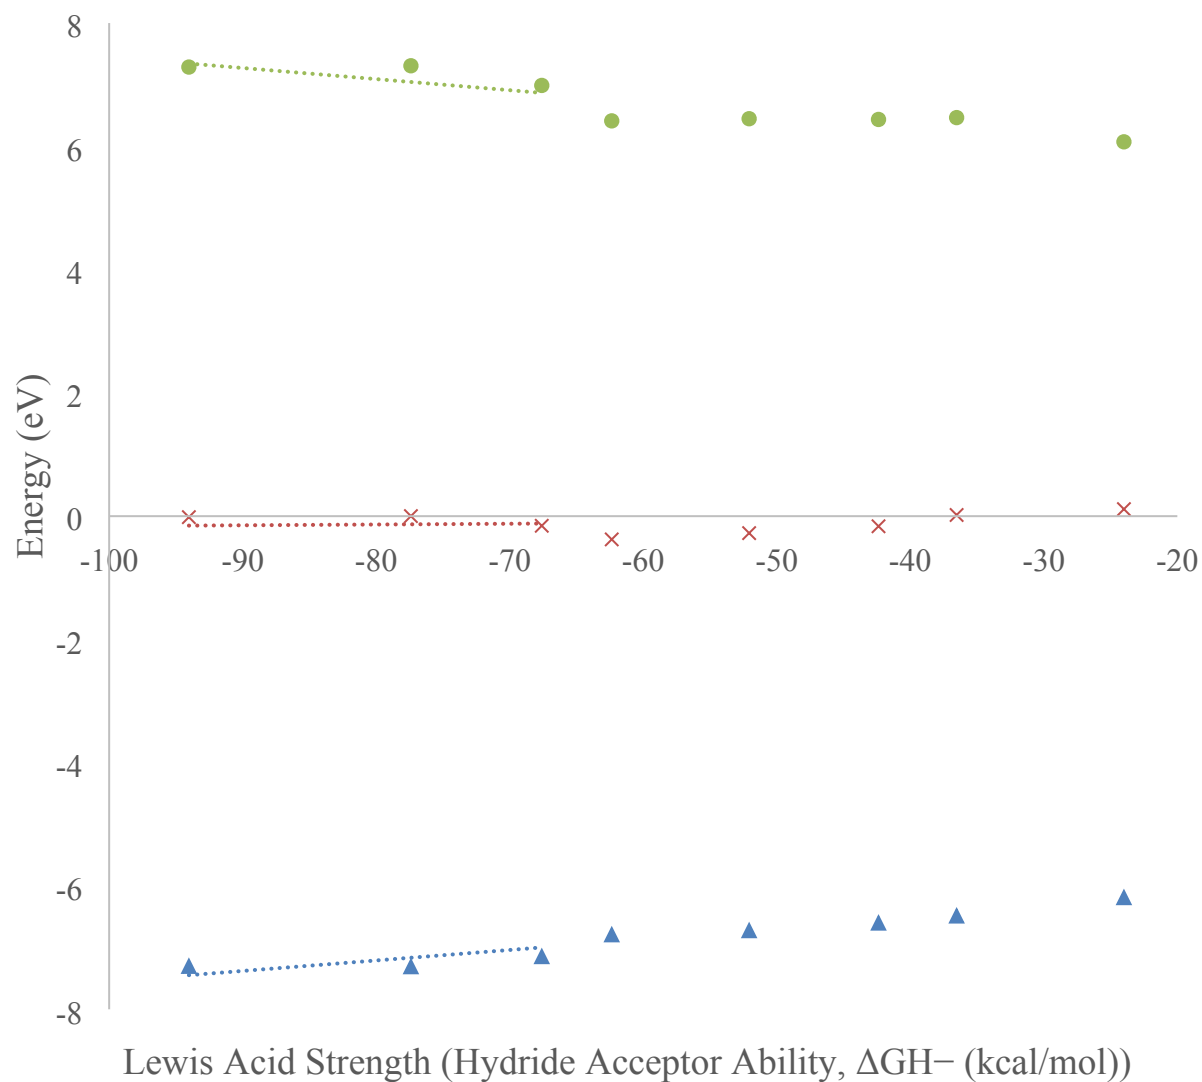

**Figure S22.** Plot showing the effect of Lewis acid strength on the energy of the HOMO (blue triangles), LUMO (red squares), and HOMO-LUMO gap (light green circles) of  $[LA_1-HQ]^-$ .

8) Plots of the Influence of Lewis Acid Strength on the Ability to Transfer H-atoms and Hydrides from  $[\text{LA}_1\text{-HQ}]^+$  and  $[\text{LA}_1\text{-HQ}]^-$

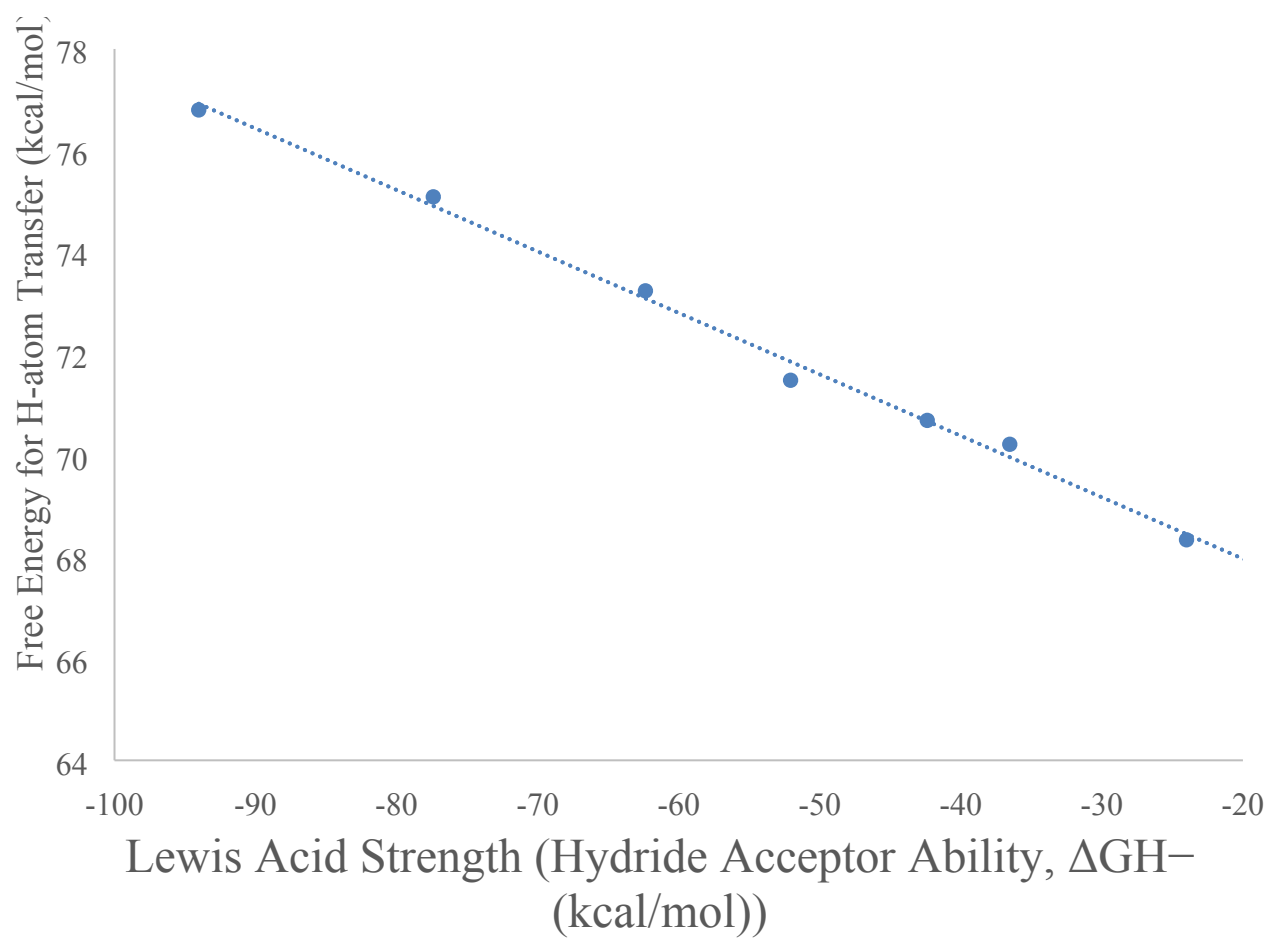

**Figure S23.** Plot showing the effect of Lewis acid strength on the ability to transfer a H-atom ( $\Delta\text{G}_{\text{H}}$ ) from  $[\text{LA}_1\text{-HQ}]^+$ .



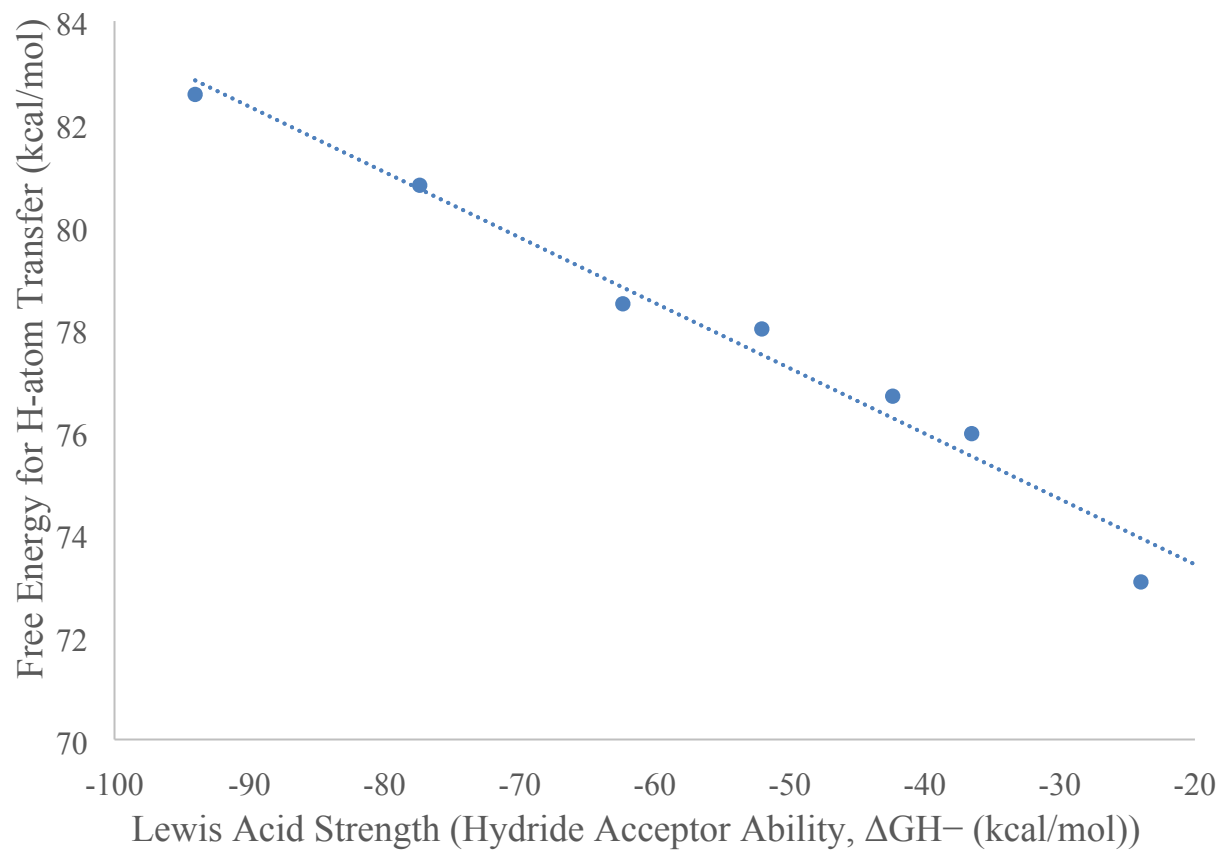

**Figure S24.** Plot showing the effect of Lewis acid strength on the ability to transfer a H-atom ( $\Delta G_{H^-}$ ) from  $[LA_1-HQ]^-$ .

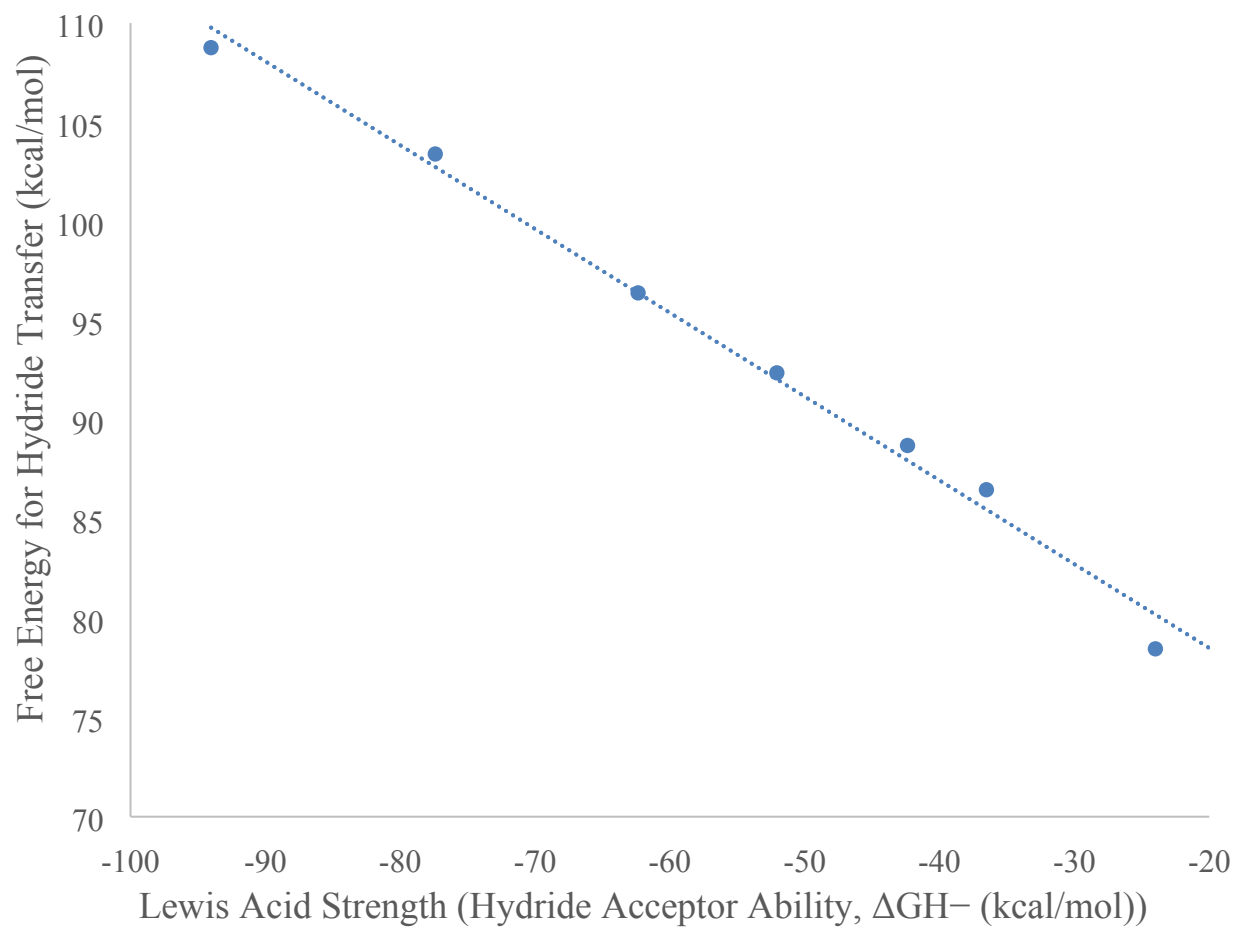

**Figure S25.** Plot showing the effect of Lewis acid strength on the ability to transfer a hydride ( $\Delta G_{H^-}$ ) from  $[LA_1-HQ]^-$ .

### 9) Computed $\Delta G_{H-}$ values of Lewis Acids

**Table S1.** Computed  $\Delta G_{H-}$  values (kcal/mol) of Lewis Acids. All calculations were implemented using the M06-2X/6-311++G(d,p)//M06-2X/6-31G(d,p) level of theory in MeCN at 298K using either the polar continuum solvation model (PCM)<sup>1</sup> or the universal solvation model (SMD).<sup>2</sup>

| Complex                                                          | $\Delta G_{H-}$ in MeCN (PCM) | $\Delta G_{H-}$ in MeCN (SMD) |
|------------------------------------------------------------------|-------------------------------|-------------------------------|
| [SiPhH <sub>2</sub> ] <sup>+</sup>                               | -97.34                        | -94.03                        |
| [SiEt <sub>3</sub> ] <sup>+</sup>                                | -83.85                        | -77.40                        |
| [Si(C <sub>6</sub> Me <sub>5</sub> ) <sub>3</sub> ] <sup>+</sup> | -74.48                        | -67.57                        |
| B(C <sub>6</sub> F <sub>5</sub> ) <sub>3</sub>                   | -66.72                        | -62.36                        |
| BPh(C <sub>6</sub> F <sub>5</sub> ) <sub>2</sub>                 | -55.48                        | -52.07                        |
| BPh <sub>2</sub> (C <sub>6</sub> F <sub>5</sub> )                | -44.98                        | -42.38                        |
| BPh <sub>3</sub>                                                 | -37.76                        | -36.53                        |
| BEt <sub>3</sub>                                                 | -23.70                        | -24.00                        |

### 10) Computed Free Energy of Formation of Acetonitrile-Lewis Acid Adducts

**Table S2.** Computed free energy of formation of acetonitrile-Lewis acid adducts. All calculations were implemented using the M06-2X/6-311++G(d,p)//M06-2X/6-31G(d,p) level of theory in MeCN at 298K using either the polar continuum solvation model (PCM)<sup>1</sup> or the universal solvation model (SMD).<sup>2</sup>

| Complex                                                               | $\Delta G_f$ (PCM) | $\Delta G_f$ (SMD) |
|-----------------------------------------------------------------------|--------------------|--------------------|
| [MeCN-SiPhH <sub>2</sub> ] <sup>+</sup>                               | -31.89             | -34.31             |
| [MeCN-SiEt <sub>3</sub> ] <sup>+</sup>                                | -28.19             | -28.79             |
| [MeCN-Si(C <sub>6</sub> Me <sub>5</sub> ) <sub>3</sub> ] <sup>+</sup> | -14.09             | -13.91             |
| MeCN-B(C <sub>6</sub> F <sub>5</sub> ) <sub>3</sub>                   | -10.55             | -10.96             |
| MeCN-BPh(C <sub>6</sub> F <sub>5</sub> ) <sub>2</sub>                 | -3.86              | -4.58              |
| MeCN-BPh <sub>2</sub> (C <sub>6</sub> F <sub>5</sub> )                | 0.30               | -0.74              |
| MeCN-BPh <sub>3</sub>                                                 | 2.77               | 1.32               |
| MeCN-BEt <sub>3</sub>                                                 | 4.38               | 3.30               |

11) Computed Free Energies of Formation for Lewis Acid-Q/[Q]<sup>-</sup>/[Q]<sup>2-</sup> Adducts

**Table S3.** Computed free energy of formation ( $\Delta G_1$ ,  $\Delta G_2$ , and  $\Delta G_3$  in kcal/mol) for **LA<sub>1</sub>-Q/[Q]<sup>-</sup>/[Q]<sup>2-</sup>** adducts. All calculations were implemented using the M06-2X/6-311++G(d,p)//M06-2X/6-31G(d,p) level of theory in MeCN at 298K.

| Complex                                                             | $\Delta G_f$ |
|---------------------------------------------------------------------|--------------|
| [SiPhH <sub>2</sub> -Q] <sup>+</sup>                                | -29.56       |
| [SiPhH <sub>2</sub> -Q] <sup>•</sup>                                | -64.33       |
| [SiPhH <sub>2</sub> -Q] <sup>-</sup>                                | -95.14       |
| [SiEt <sub>3</sub> -Q] <sup>+</sup>                                 | -22.32       |
| [SiEt <sub>3</sub> -Q] <sup>•</sup>                                 | -53.50       |
| [SiEt <sub>3</sub> -Q] <sup>-</sup>                                 | -81.80       |
| [Si(C <sub>6</sub> Me <sub>5</sub> ) <sub>3</sub> -Q] <sup>+</sup>  | 1.27         |
| [Si(C <sub>6</sub> Me <sub>5</sub> ) <sub>3</sub> -Q] <sup>•</sup>  | -30.75       |
| [Si(C <sub>6</sub> Me <sub>5</sub> ) <sub>3</sub> -Q] <sup>-</sup>  | -59.63       |
| B(C <sub>6</sub> F <sub>5</sub> ) <sub>3</sub> -Q                   | -3.76        |
| [B(C <sub>6</sub> F <sub>5</sub> ) <sub>3</sub> -Q] <sup>-</sup>    | -30.25       |
| [B(C <sub>6</sub> F <sub>5</sub> ) <sub>3</sub> -Q] <sup>2-</sup>   | -54.35       |
| B(C <sub>6</sub> F <sub>5</sub> ) <sub>2</sub> Ph-Q                 | 1.16         |
| [B(C <sub>6</sub> F <sub>5</sub> ) <sub>2</sub> Ph-Q] <sup>-</sup>  | -21.79       |
| [B(C <sub>6</sub> F <sub>5</sub> ) <sub>2</sub> Ph-Q] <sup>2-</sup> | -44.32       |
| B(C <sub>6</sub> F <sub>5</sub> )Ph <sub>2</sub> -Q                 | 4.94         |
| [B(C <sub>6</sub> F <sub>5</sub> )Ph <sub>2</sub> -Q] <sup>-</sup>  | -15.66       |
| [B(C <sub>6</sub> F <sub>5</sub> )Ph <sub>2</sub> -Q] <sup>2-</sup> | -36.85       |
| BPh <sub>3</sub> -Q                                                 | 7.42         |
| [BPh <sub>3</sub> -Q] <sup>-</sup>                                  | -11.68       |
| [BPh <sub>3</sub> -Q] <sup>2-</sup>                                 | -29.46       |
| BEt <sub>3</sub> -Q                                                 | 9.20         |
| [BEt <sub>3</sub> -Q] <sup>-</sup>                                  | -4.76        |
| [BEt <sub>3</sub> -Q] <sup>2-</sup>                                 | -20.40       |

**Table S4.** Computed free energy of formation ( $\Delta G_4$ ,  $\Delta G_5$ , and  $\Delta G_6$  in kcal/mol) for  $\text{LA}_1\text{-Q}/[\text{Q}]^{1-}/[\text{Q}]^{2-}\text{-LA}_1$  adducts. All calculations were implemented using the M06-2X/6-311++G(d,p)//M06-2X/6-31G(d,p) level of theory in MeCN at 298K.

| Complex                                                                                        | $\Delta G_f$ |
|------------------------------------------------------------------------------------------------|--------------|
| $[\text{SiPhH}_2\text{-Q-SiPhH}_2]^{2+}$                                                       | -17.03       |
| $[\text{SiPhH}_2\text{-Q-SiPhH}_2]^{1+}$                                                       | -45.53       |
| $\text{SiPhH}_2\text{-Q-SiPhH}_2$                                                              | -84.09       |
| $[\text{SiEt}_3\text{-Q-SiEt}_3]^{2+}$                                                         | -10.87       |
| $[\text{SiEt}_3\text{-Q-SiEt}_3]^{1+}$                                                         | -36.52       |
| $\text{SiEt}_3\text{-Q-SiEt}_3$                                                                | -70.20       |
| $[\text{Si}(\text{C}_6\text{Me}_5)_3\text{-Q-Si}(\text{C}_6\text{Me}_5)_3]^{2+}$               | 11.56        |
| $[\text{Si}(\text{C}_6\text{Me}_5)_3\text{-Q-Si}(\text{C}_6\text{Me}_5)_3]^{1+}$               | -26.17       |
| $\text{Si}(\text{C}_6\text{Me}_5)_3\text{-Q-Si}(\text{C}_6\text{Me}_5)_3$                      | -55.50       |
| $\text{B}(\text{C}_6\text{F}_5)_3\text{-Q-B}(\text{C}_6\text{F}_5)_3$                          | 3.15         |
| $[\text{B}(\text{C}_6\text{F}_5)_3\text{-Q-B}(\text{C}_6\text{F}_5)_3]^{1-}$                   | -19.37       |
| $[\text{B}(\text{C}_6\text{F}_5)_3\text{-Q-B}(\text{C}_6\text{F}_5)_3]^{2-}$                   | -46.19       |
| $\text{B}(\text{C}_6\text{F}_5)_2\text{Ph-Q-B}(\text{C}_6\text{F}_5)_2\text{Ph}$               | 4.61         |
| $[\text{B}(\text{C}_6\text{F}_5)_2\text{Ph-Q-B}(\text{C}_6\text{F}_5)_2\text{Ph}]^{1-}$        | -12.88       |
| $[\text{B}(\text{C}_6\text{F}_5)_2\text{Ph-Q-B}(\text{C}_6\text{F}_5)_2\text{Ph}]^{2-}$        | -38.28       |
| $\text{B}(\text{C}_6\text{F}_5)\text{Ph}_2\text{-Q-B}(\text{C}_6\text{F}_5)\text{Ph}_2$        | 8.27         |
| $[\text{B}(\text{C}_6\text{F}_5)\text{Ph}_2\text{-Q-B}(\text{C}_6\text{F}_5)\text{Ph}_2]^{1-}$ | -8.28        |
| $[\text{B}(\text{C}_6\text{F}_5)\text{Ph}_2\text{-Q-B}(\text{C}_6\text{F}_5)\text{Ph}_2]^{2-}$ | -30.87       |
| $\text{BPh}_3\text{-Q-BPh}_3$                                                                  | 10.96        |
| $[\text{BPh}_3\text{-Q-BPh}_3]^{1-}$                                                           | -5.18        |
| $[\text{BPh}_3\text{-Q-BPh}_3]^{2-}$                                                           | -27.16       |
| $\text{BEt}_3\text{-Q-BEt}_3$                                                                  | 8.76         |
| $[\text{BEt}_3\text{-Q-BEt}_3]^{1-}$                                                           | 0.33         |
| $[\text{BEt}_3\text{-Q-BEt}_3]^{2-}$                                                           | -15.41       |

**Table S5.** Computed free energy of formation ( $\Delta G_4$ ,  $\Delta G_5$ , and  $\Delta G_6$  in kcal/mol) for  $B(C_6F_5)_3-Q/[Q]^-/[Q]^{2-}-LA_2$  adducts. All calculations were implemented using the M06-2X/6-311++G(d,p)//M06-2X/6-31G(d,p) level of theory in MeCN at 298K.

| Complex                                 | $\Delta G_f$ |
|-----------------------------------------|--------------|
| $[B(C_6F_5)_3-Q-SiPhH_2]^+$             | 6.61         |
| $[B(C_6F_5)_3-Q-SiPhH_2]^{\cdot}$       | -15.53       |
| $[B(C_6F_5)_3-Q-SiPhH_2]^-$             | -44.70       |
| $[B(C_6F_5)_3-Q-SiEt_3]^+$              | 7.80         |
| $[B(C_6F_5)_3-Q-SiEt_3]^{\cdot}$        | -15.83       |
| $[B(C_6F_5)_3-Q-SiEt_3]^-$              | -45.55       |
| $[B(C_6F_5)_3-Q-Si(C_6Me_5)_3]^+$       | 1.66         |
| $[B(C_6F_5)_3-Q-Si(C_6Me_5)_3]^{\cdot}$ | -22.29       |
| $[B(C_6F_5)_3-Q-Si(C_6Me_5)_3]^-$       | -55.32       |
| $B(C_6F_5)_3-Q-B(C_6F_5)_2Ph$           | 1.27         |
| $[B(C_6F_5)_3-Q-B(C_6F_5)_2Ph]^-$       | -20.42       |
| $[B(C_6F_5)_3-BQ-B(C_6F_5)_2Ph]^{2-}$   | -47.81       |
| $B(C_6F_5)_3-Q-B(C_6F_5)Ph_2$           | 1.41         |
| $[B(C_6F_5)_3-Q-B(C_6F_5)Ph_2]^-$       | -21.01       |
| $[B(C_6F_5)_3-Q-B(C_6F_5)Ph_2]^{2-}$    | -47.37       |
| $B(C_6F_5)_3-Q-BPh_3$                   | 0.70         |
| $[B(C_6F_5)_3-Q-BPh_3]^-$               | -21.78       |
| $[B(C_6F_5)_3-Q-BPh_3]^{2-}$            | -49.44       |
| $B(C_6F_5)_3-Q-BEt_3$                   | -3.14        |
| $[B(C_6F_5)_3-Q-BEt_3]^-$               | -22.93       |
| $[B(C_6F_5)_3-Q-BEt_3]^{2-}$            | -48.31       |

**Table S6.** Computed free energy of formation ( $\Delta G_7$ ,  $\Delta G_8$ , and  $\Delta G_9$  in kcal/mol) for  $\text{LA}_1\text{-[HQ]}^+/\text{[HQ]}^+/\text{[HQ]}^-$  adducts. All calculations were implemented using the M06-2X/6-311++G(d,p)//M06-2X/6-31G(d,p) level of theory in MeCN at 298K.

| Complex                                                    | $\Delta G_f$ |
|------------------------------------------------------------|--------------|
| $[\text{SiPhH}_2\text{-HQ}]^{2+}$                          | -14.28       |
| $[\text{SiPhH}_2\text{-HQ}]^{*+}$                          | -44.56       |
| $\text{SiPhH}_2\text{-HQ}$                                 | -82.90       |
| $[\text{SiEt}_3\text{-HQ}]^{2+}$                           | -8.98        |
| $[\text{SiEt}_3\text{-HQ}]^{*+}$                           | -35.61       |
| $\text{SiEt}_3\text{-HQ}$                                  | -70.30       |
| $[\text{Si}(\text{C}_6\text{Me}_5)_3\text{-HQ}]^{2+}$      | 6.71         |
| $[\text{Si}(\text{C}_6\text{Me}_5)_3\text{-HQ}]^{*+}$      | -20.02       |
| $\text{HQ-Si}(\text{C}_6\text{Me}_5)_3$                    | -47.93       |
| $[\text{B}(\text{C}_6\text{F}_5)_3\text{-HQ}]^+$           | 8.96         |
| $[\text{B}(\text{C}_6\text{F}_5)_3\text{-HQ}]^{\bullet}$   | -15.20       |
| $[\text{B}(\text{C}_6\text{F}_5)_3\text{-HQ}]^-$           | -44.74       |
| $[\text{B}(\text{C}_6\text{F}_5)_2\text{Ph-HQ}]^+$         | 10.61        |
| $[\text{B}(\text{C}_6\text{F}_5)_2\text{Ph-HQ}]^{\bullet}$ | -8.80        |
| $[\text{HQ-B}(\text{C}_6\text{F}_5)_2\text{Ph}]^-$         | -35.79       |
| $[\text{HQ-BPh}_2(\text{C}_6\text{F}_5)]^+$                | 8.22         |
| $\text{HQ-BPh}_2(\text{C}_6\text{F}_5)$                    | -3.96        |
| $[\text{HQ-BPh}_2(\text{C}_6\text{F}_5)]^-$                | -28.35       |
| $[\text{HQ-BPh}_3]^+$                                      | 8.69         |
| $\text{HQ-BPh}_3$                                          | -1.00        |
| $[\text{HQ-BPh}_3]^-$                                      | -23.64       |
| $[\text{HQ-BEt}_3]^+$                                      | 7.12         |
| $\text{HQ-BEt}_3$                                          | 2.67         |
| $[\text{HQ-BEt}_3]^-$                                      | -13.83       |

12) Computed Reduction Potentials for Lewis Acid-Q/[Q]<sup>-</sup> Adducts

**Table S7.** Computed reduction potentials of benzoquinone ( $E^\circ(1)$  and  $E^\circ(2)$ ) vs.  $\text{Cp}_2\text{Fe}/\text{Cp}_2\text{Fe}^+$  using the 6-31G(d,p) basis set for all non metal atoms and the SDD basis set for iron in all geometry optimizations. The 6-311++G(d,p) basis set was used for all non metal atoms and the SDD basis set for iron in all single point solvation calculations. All solvation calculations were performed in MeCN at 298K using the universal solvation model (SMD).<sup>2</sup>

| Functional | $E^\circ(1)$ (V) | $E^\circ(2)$ (V) | Average Difference from Experimental Values |
|------------|------------------|------------------|---------------------------------------------|
| Experiment | -0.94            | -1.79            | 0                                           |
| M06-2X     | -0.96            | -2.20            | 0.276                                       |
| B3LYP      | -1.05            | -2.38            | 0.350                                       |
| B3LYP-D3   | -1.09            | -2.50            | 0.351                                       |
| X3LYP      | -1.06            | -2.43            | 0.375                                       |
| TPPSh      | -1.06            | -2.46            | 0.397                                       |
| M06        | -0.51            | -2.34            | 0.489                                       |
| BP86       | -0.41            | -2.25            | 0.497                                       |
| B97D       | -0.46            | -2.45            | 0.570                                       |
| M06L       | -0.46            | -2.55            | 0.619                                       |



**Table S8.** Computed reduction potentials ( $E^\circ(1)$ ,  $E^\circ(2)$ ,  $E^\circ(3)$ , and  $E^\circ(4)$ ) vs.  $\text{Cp}_2\text{Fe}/\text{Cp}_2\text{Fe}^+$  for  $\text{LA}_1\text{-Q}/[\text{Q}]^{\pm}$  adducts. All calculations were implemented using the M06-2X/6-311++G(d,p)//M06-2X/6-31G(d,p) level of theory in MeCN at 298K.

| Complex                                                      | Redox Potential (V) |
|--------------------------------------------------------------|---------------------|
| Q                                                            | -0.96               |
| $[\text{Q}]^{\pm}$                                           | -2.20               |
| $[\text{SiPhH}_2\text{-Q}]^+$                                | 0.54                |
| $[\text{SiPhH}_2\text{-Q}]^\cdot$                            | -0.86               |
| $[\text{SiEt}_3\text{-Q}]^+$                                 | 0.39                |
| $[\text{SiEt}_3\text{-Q}]^\cdot$                             | -0.97               |
| $[\text{Si}(\text{C}_6\text{Me}_5)_3\text{-Q}]^+$            | 0.42                |
| $[\text{Si}(\text{C}_6\text{Me}_5)_3\text{-Q}]^\cdot$        | -0.95               |
| $[\text{B}(\text{C}_6\text{F}_5)_3\text{-Q}]$                | 0.18                |
| $[\text{B}(\text{C}_6\text{F}_5)_3\text{-Q}]^{\pm}$          | -1.16               |
| $\text{B}(\text{C}_6\text{F}_5)_2\text{Ph-Q}$                | 0.03                |
| $[\text{B}(\text{C}_6\text{F}_5)_2\text{Ph-Q}]^{\pm}$        | -1.22               |
| $\text{B}(\text{C}_6\text{F}_5)\text{Ph}_2\text{-Q}$         | -0.07               |
| $[\text{B}(\text{C}_6\text{F}_5)\text{Ph}_2\text{-Q}]^{\pm}$ | -1.28               |
| $\text{BPh}_3\text{-Q}$                                      | -0.14               |
| $[\text{BPh}_3\text{-Q}]^{\pm}$                              | -1.43               |
| $\text{BEt}_3\text{-Q}$                                      | -0.36               |

**Table S9.** Computed reduction potentials ( $E^\circ(3)$ , and  $E^\circ(4)$ ) vs.  $\text{Cp}_2\text{Fe}/\text{Cp}_2\text{Fe}^+$  for  $\text{LA}_1\text{-Q}/[\text{Q}]^- \text{-LA}_1$  adducts. All calculations were implemented using the M06-2X/6-311++G(d,p)//M06-2X/6-31G(d,p) level of theory in MeCN at 298K.

| Complex                                                                                       | Redox Potential (V) |
|-----------------------------------------------------------------------------------------------|---------------------|
| $[\text{SiPhH}_2\text{-Q-SiPhH}_2]^{2+}$                                                      | 1.78                |
| $[\text{SiPhH}_2\text{-Q-SiPhH}_2]^{*+}$                                                      | 0.81                |
| $[\text{SiEt}_3\text{-Q-SiEt}_3]^{2+}$                                                        | 1.50                |
| $[\text{SiEt}_3\text{-Q-SiEt}_3]^{*+}$                                                        | 0.49                |
| $[\text{Si}(\text{C}_6\text{Me}_5)_3\text{-Q-Si}(\text{C}_6\text{Me}_5)_3]^{2+}$              | 2.06                |
| $[\text{Si}(\text{C}_6\text{Me}_5)_3\text{-Q-Si}(\text{C}_6\text{Me}_5)_3]^{*+}$              | 0.32                |
| $\text{B}(\text{C}_6\text{F}_5)_3\text{-Q-B}(\text{C}_6\text{F}_5)_3$                         | 1.16                |
| $[\text{B}(\text{C}_6\text{F}_5)_3\text{-Q-B}(\text{C}_6\text{F}_5)_3]^{-}$                   | 0.01                |
| $\text{B}(\text{C}_6\text{F}_5)_2\text{Ph-Q-B}(\text{C}_6\text{F}_5)_2\text{Ph}$              | 0.79                |
| $[\text{B}(\text{C}_6\text{F}_5)_2\text{Ph-Q-B}(\text{C}_6\text{F}_5)_2\text{Ph}]^{-}$        | -0.12               |
| $\text{B}(\text{C}_6\text{F}_5)\text{Ph}_2\text{-Q-B}(\text{C}_6\text{F}_5)\text{Ph}_2$       | 0.65                |
| $[\text{B}(\text{C}_6\text{F}_5)\text{Ph}_2\text{-Q-B}(\text{C}_6\text{F}_5)\text{Ph}_2]^{-}$ | -0.30               |
| $\text{BPh}_3\text{-Q-BPh}_3$                                                                 | 0.56                |
| $[\text{BPh}_3\text{-Q-BPh}_3]^{-}$                                                           | -0.48               |
| $\text{BEt}_3\text{-Q-BEt}_3$                                                                 | 0.01                |
| $[\text{BEt}_3\text{-Q-BEt}_3]^{-}$                                                           | -0.84               |

**Table S10.** Computed reduction potentials ( $E^\circ(3)$ , and  $E^\circ(4)$ ) vs.  $\text{Cp}_2\text{Fe}/\text{Cp}_2\text{Fe}^+$  for  $\text{B}(\text{C}_6\text{F}_5)_3\text{-Q}/[\text{Q}]^{\cdot-}\text{-LA}_1$  adducts. All calculations were implemented using the M06-2X/6-311++G(d,p)//M06-2X/6-31G(d,p) level of theory in MeCN at 298K.

| Complex                                                                                    | Redox Potential (V) |
|--------------------------------------------------------------------------------------------|---------------------|
| $[\text{B}(\text{C}_6\text{F}_5)_3\text{-BQ-SiPhH}_2]^+$                                   | 1.50                |
| $[\text{B}(\text{C}_6\text{F}_5)_3\text{-BQ-SiPhH}_2]^{\cdot}$                             | 0.40                |
| $[\text{B}(\text{C}_6\text{F}_5)_3\text{-BQ-SiEt}_3]^+$                                    | 1.41                |
| $[\text{B}(\text{C}_6\text{F}_5)_3\text{-BQ-SiEt}_3]^{\cdot}$                              | 0.31                |
| $[\text{B}(\text{C}_6\text{F}_5)_3\text{-BQ-Si}(\text{C}_6\text{Me}_5)_3]^+$               | 1.24                |
| $[\text{B}(\text{C}_6\text{F}_5)_3\text{-BQ-Si}(\text{C}_6\text{Me}_5)_3]^{\cdot}$         | 0.26                |
| $\text{B}(\text{C}_6\text{F}_5)_3\text{-BQ-B}(\text{C}_6\text{F}_5)_2\text{Ph}$            | 0.97                |
| $[\text{B}(\text{C}_6\text{F}_5)_3\text{-BQ-B}(\text{C}_6\text{F}_5)_2\text{Ph}]^{\cdot-}$ | -0.04               |
| $\text{B}(\text{C}_6\text{F}_5)_3\text{-BQ-B}(\text{C}_6\text{F}_5)\text{Ph}_2$            | 0.90                |
| $[\text{B}(\text{C}_6\text{F}_5)_3\text{-BQ-B}(\text{C}_6\text{F}_5)\text{Ph}_2]^{\cdot-}$ | -0.14               |
| $\text{B}(\text{C}_6\text{F}_5)_3\text{-BQ-BPh}_3$                                         | 0.84                |
| $[\text{B}(\text{C}_6\text{F}_5)_3\text{-BQ-BPh}_3]^{\cdot-}$                              | -0.23               |
| $\text{B}(\text{C}_6\text{F}_5)_3\text{-BQ-BEt}_3$                                         | 0.50                |
| $[\text{B}(\text{C}_6\text{F}_5)_3\text{-BQ-BEt}_3]^{\cdot-}$                              | -0.42               |

**Table S11.** Computed reduction potentials ( $E^\circ(7)$ ,  $E^\circ(8)$ ,  $E^\circ(9)$ , and  $E^\circ(10)$ ) vs.  $\text{Cp}_2\text{Fe}/\text{Cp}_2\text{Fe}^+$  for  $\text{LA}_1\text{-[HQ]}^+/\text{[HQ]}^\cdot$  adducts. All calculations were implemented using the M06-2X/6-311++G(d,p)//M06-2X/6-31G(d,p) level of theory in MeCN at 298K.

| Complex                                                       | Redox Potential |
|---------------------------------------------------------------|-----------------|
| $[\text{HQ}]^+$                                               | 0.37            |
| $[\text{HQ}]^{\cdot-}$                                        | -1.14           |
| $[\text{H-HQ}]^{2+}$                                          | 1.90            |
| $[\text{H-HQ}]^{+\cdot}$                                      | 0.51            |
| $[\text{SiPhH}_2\text{-HQ}]^{2+}$                             | 1.95            |
| $[\text{SiPhH}_2\text{-HQ}]^{+\cdot}$                         | 0.79            |
| $[\text{SiEt}_3\text{-HQ}]^{2+}$                              | 1.79            |
| $[\text{SiEt}_3\text{-HQ}]^{+\cdot}$                          | 0.63            |
| $[\text{Si}(\text{C}_6\text{Me}_5)_3\text{-HQ}]^{2+}$         | 1.79            |
| $[\text{Si}(\text{C}_6\text{Me}_5)_3\text{-HQ}]^{+\cdot}$     | 0.34            |
| $[\text{B}(\text{C}_6\text{F}_5)_3\text{-HQ}]^+$              | 1.68            |
| $[\text{B}(\text{C}_6\text{F}_5)_3\text{-HQ}]^\cdot$          | 0.41            |
| $[\text{B}(\text{C}_6\text{F}_5)_2\text{Ph-HQ}]^+$            | 1.38            |
| $[\text{B}(\text{C}_6\text{F}_5)_2\text{Ph-HQ}]^\cdot$        | 0.31            |
| $[\text{B}(\text{C}_6\text{F}_5)\text{Ph}_2\text{-HQ}]^+$     | 1.11            |
| $[\text{B}(\text{C}_6\text{F}_5)\text{Ph}_2\text{-HQ}]^\cdot$ | 0.19            |
| $[\text{BPh}_3\text{-HQ}]^+$                                  | 1.05            |
| $[\text{BPh}_3\text{-HQ}]^\cdot$                              | 0.11            |
| $[\text{BEt}_3\text{-HQ}]^+$                                  | 0.83            |
| $[\text{BEt}_3\text{-HQ}]^\cdot$                              | -0.15           |

## 13) Energies for Computed Structures

**Table S12.** Computed energies for the optimized structures of the **LA<sub>1</sub>-Q** adducts. All calculations were implemented using the M06-2X/6-311++G(d,p)//M06-2X/6-31G(d,p) level of theory in MeCN at 298K.

| <b>LA<sub>1</sub>-Q</b>                                             | <b>Electronic Energies Gas Phase (Hartrees)</b> | <b>Free Energy Correction Gas Phase (Hartrees)</b> | <b>Enthalpy Correction Gas Phase (Hartrees)</b> |
|---------------------------------------------------------------------|-------------------------------------------------|----------------------------------------------------|-------------------------------------------------|
| Q                                                                   | -381.296290                                     | 0.055641                                           | 0.093408                                        |
| [Q] <sup>-</sup>                                                    | -381.355670                                     | 0.053848                                           | 0.091474                                        |
| [Q] <sup>2-</sup>                                                   | -381.201512                                     | 0.052440                                           | 0.089230                                        |
| [SiPhH <sub>2</sub> -Q] <sup>+</sup>                                | -903.2852613                                    | 0.154655                                           | 0.212679                                        |
| [SiPhH <sub>2</sub> -Q] <sup>•</sup>                                | -903.5482001                                    | 0.152962                                           | 0.211156                                        |
| [SiPhH <sub>2</sub> -Q] <sup>-</sup>                                | -903.6117445                                    | 0.152487                                           | 0.210111                                        |
| [SiEt <sub>3</sub> -Q] <sup>+</sup>                                 | -908.1319932                                    | 0.240792                                           | 0.307774                                        |
| [SiEt <sub>3</sub> -Q] <sup>•</sup>                                 | -908.3893330                                    | 0.239408                                           | 0.306287                                        |
| [SiEt <sub>3</sub> -Q] <sup>-</sup>                                 | -908.4499292                                    | 0.234900                                           | 0.304999                                        |
| [Si(C <sub>6</sub> Me <sub>5</sub> ) <sub>3</sub> -Q] <sup>+</sup>  | -1954.696430                                    | 0.710547                                           | 0.835130                                        |
| [Si(C <sub>6</sub> Me <sub>5</sub> ) <sub>3</sub> -Q] <sup>•</sup>  | -1954.104151                                    | 0.710086                                           | 0.833703                                        |
| [Si(C <sub>6</sub> Me <sub>5</sub> ) <sub>3</sub> -Q] <sup>-</sup>  | -1954.996116                                    | 0.709442                                           | 0.832280                                        |
| B(C <sub>6</sub> F <sub>5</sub> ) <sub>3</sub> -Q                   | -2588.832532                                    | 0.177776                                           | 0.283064                                        |
| [B(C <sub>6</sub> F <sub>5</sub> ) <sub>3</sub> -Q] <sup>-</sup>    | -2588.975262                                    | 0.175760                                           | 0.281259                                        |
| [B(C <sub>6</sub> F <sub>5</sub> ) <sub>3</sub> -Q] <sup>2-</sup>   | -2588.933186                                    | 0.173476                                           | 0.279217                                        |
| B(C <sub>6</sub> F <sub>5</sub> ) <sub>2</sub> Ph-Q                 | -2092.833315                                    | 0.222392                                           | 0.318983                                        |
| [B(C <sub>6</sub> F <sub>5</sub> ) <sub>2</sub> Ph-Q] <sup>-</sup>  | -2092.970377                                    | 0.221658                                           | 0.317300                                        |
| [B(C <sub>6</sub> F <sub>5</sub> ) <sub>2</sub> Ph-Q] <sup>2-</sup> | -2092.922892                                    | 0.219611                                           | 0.315303                                        |
| B(C <sub>6</sub> F <sub>5</sub> )Ph <sub>2</sub> -Q                 | -1596.834802                                    | 0.267048                                           | 0.354855                                        |
| [B(C <sub>6</sub> F <sub>5</sub> )Ph <sub>2</sub> -Q] <sup>-</sup>  | -1596.961582                                    | 0.266338                                           | 0.353097                                        |
| [B(C <sub>6</sub> F <sub>5</sub> )Ph <sub>2</sub> -Q] <sup>2-</sup> | -1596.908295                                    | 0.264357                                           | 0.350905                                        |
| BPh <sub>3</sub> -Q                                                 | -1100.833671                                    | 0.312840                                           | 0.390995                                        |
| [BPh <sub>3</sub> -Q] <sup>-</sup>                                  | -1100.954617                                    | 0.311836                                           | 0.389146                                        |
| [BPh <sub>3</sub> -Q] <sup>2-</sup>                                 | -1100.893988                                    | 0.310876                                           | 0.386894                                        |
| BEt <sub>3</sub> -Q                                                 | -643.7095341                                    | 0.247352                                           | 0.309673                                        |
| [BEt <sub>3</sub> -Q] <sup>-</sup>                                  | -643.8180804                                    | 0.245967                                           | 0.307803                                        |
| [BEt <sub>3</sub> -Q] <sup>2-</sup>                                 | -643.7379794                                    | 0.243509                                           | 0.304935                                        |

**Table S13.** Computed energies for the optimized structures of the **LA<sub>1</sub>-Q-LA<sub>1</sub>** adducts. All calculations were implemented using the M06-2X/6-311++G(d,p)//M06-2X/6-31G(d,p) level of theory in MeCN at 298K.

| <b>LA<sub>1</sub>-Q-LA<sub>1</sub> Adduct</b>                                                                          | <b>Electronic Energies Gas Phase (Hartrees)</b> | <b>Free Energy Correction Gas Phase (Hartrees)</b> | <b>Enthalpy Correction Gas Phase (Hartrees)</b> |
|------------------------------------------------------------------------------------------------------------------------|-------------------------------------------------|----------------------------------------------------|-------------------------------------------------|
| [SiPhH <sub>2</sub> -Q-SiPhH <sub>2</sub> ] <sup>2+</sup>                                                              | -1425.162402                                    | 0.251926                                           | 0.331418                                        |
| [SiPhH <sub>2</sub> -Q-SiPhH <sub>2</sub> ] <sup>++</sup>                                                              | -1425.583185                                    | 0.254196                                           | 0.331689                                        |
| SiPhH <sub>2</sub> -Q-SiPhH <sub>2</sub>                                                                               | -1425.845201                                    | 0.255021                                           | 0.331040                                        |
| [SiEt <sub>3</sub> -Q-SiEt <sub>3</sub> ] <sup>2+</sup>                                                                | -1434.858298                                    | 0.424141                                           | 0.521377                                        |
| [SiEt <sub>3</sub> -Q-SiEt <sub>3</sub> ] <sup>++</sup>                                                                | -1435.267256                                    | 0.425583                                           | 0.521749                                        |
| SiEt <sub>3</sub> -Q-SiEt <sub>3</sub>                                                                                 | -1435.523044                                    | 0.428732                                           | 0.520837                                        |
| [Si(C <sub>6</sub> Me <sub>5</sub> ) <sub>3</sub> -Q-Si(C <sub>6</sub> Me <sub>5</sub> ) <sub>3</sub> ] <sup>2+</sup>  | -3526.448362                                    | 1.368152                                           | 1.575019                                        |
| [Si(C <sub>6</sub> Me <sub>5</sub> ) <sub>3</sub> -Q-Si(C <sub>6</sub> Me <sub>5</sub> ) <sub>3</sub> ] <sup>++</sup>  | -3526.828555                                    | 1.366112                                           | 1.574903                                        |
| Si(C <sub>6</sub> Me <sub>5</sub> ) <sub>3</sub> -Q-Si(C <sub>6</sub> Me <sub>5</sub> ) <sub>3</sub>                   | -3527.058856                                    | 1.366034                                           | 1.573958                                        |
| B(C <sub>6</sub> F <sub>5</sub> ) <sub>3</sub> -Q-B(C <sub>6</sub> F <sub>5</sub> ) <sub>3</sub>                       | -4796.356887                                    | 0.299854                                           | 0.472628                                        |
| [B(C <sub>6</sub> F <sub>5</sub> ) <sub>3</sub> -Q-B(C <sub>6</sub> F <sub>5</sub> ) <sub>3</sub> ] <sup>-</sup>       | -4796.556888                                    | 0.298581                                           | 0.471791                                        |
| [B(C <sub>6</sub> F <sub>5</sub> ) <sub>3</sub> -Q-B(C <sub>6</sub> F <sub>5</sub> ) <sub>3</sub> ] <sup>2-</sup>      | -4796.609130                                    | 0.297890                                           | 0.469771                                        |
| B(C <sub>6</sub> F <sub>5</sub> ) <sub>2</sub> Ph-Q-B(C <sub>6</sub> F <sub>5</sub> ) <sub>2</sub> Ph                  | -3804.362193                                    | 0.386337                                           | 0.544310                                        |
| [B(C <sub>6</sub> F <sub>5</sub> ) <sub>2</sub> Ph-Q-B(C <sub>6</sub> F <sub>5</sub> ) <sub>2</sub> Ph] <sup>-</sup>   | -3804.550930                                    | 0.389467                                           | 0.543558                                        |
| [B(C <sub>6</sub> F <sub>5</sub> ) <sub>2</sub> Ph-BQ-B(C <sub>6</sub> F <sub>5</sub> ) <sub>2</sub> Ph] <sup>2-</sup> | -3804.593513                                    | 0.388100                                           | 0.541517                                        |
| B(C <sub>6</sub> F <sub>5</sub> )Ph <sub>2</sub> -Q-B(C <sub>6</sub> F <sub>5</sub> )Ph <sub>2</sub>                   | -2812.367177                                    | 0.476891                                           | 0.616226                                        |
| [B(C <sub>6</sub> F <sub>5</sub> )Ph <sub>2</sub> -BQ-B(C <sub>6</sub> F <sub>5</sub> )Ph <sub>2</sub> ] <sup>-</sup>  | -2812.540106                                    | 0.479319                                           | 0.615310                                        |
| [B(C <sub>6</sub> F <sub>5</sub> )Ph <sub>2</sub> -Q-B(C <sub>6</sub> F <sub>5</sub> )Ph <sub>2</sub> ] <sup>2-</sup>  | -2812.567501                                    | 0.477304                                           | 0.612951                                        |
| BPh <sub>3</sub> -Q-BPh <sub>3</sub>                                                                                   | -1820.367395                                    | 0.570276                                           | 0.688473                                        |
| [BPh <sub>3</sub> -Q-BPh <sub>3</sub> ] <sup>-</sup>                                                                   | -1820.530343                                    | 0.570247                                           | 0.687364                                        |
| [BPh <sub>3</sub> -Q-BPh <sub>3</sub> ] <sup>2-</sup>                                                                  | -1820.546313                                    | 0.568818                                           | 0.684839                                        |
| BEt <sub>3</sub> -Q-BEt <sub>3</sub>                                                                                   | -906.1156913                                    | 0.432239                                           | 0.525774                                        |
| [BEt <sub>3</sub> -Q-BEt <sub>3</sub> ] <sup>-</sup>                                                                   | -906.2631155                                    | 0.438745                                           | 0.524438                                        |
| [BEt <sub>3</sub> -Q-BEt <sub>3</sub> ] <sup>2-</sup>                                                                  | -906.2459751                                    | 0.436429                                           | 0.521362                                        |

**Table S14.** Computed energies for the optimized structures of the  $\text{B}(\text{C}_6\text{F}_5)_3\text{-Q-LA}_2$  adducts. All calculations were implemented using the M06-2X/6-311++G(d,p)//M06-2X/6-31G(d,p) level of theory in MeCN at 298K.

| $\text{B}(\text{C}_6\text{F}_5)_3\text{-Q-LA}_2$ Adduct                                | Electronic Energies Gas Phase (Hartrees) | Free Energy Correction Gas Phase (Hartrees) | Enthalpy Correction Gas Phase (Hartrees) |
|----------------------------------------------------------------------------------------|------------------------------------------|---------------------------------------------|------------------------------------------|
| $[\text{B}(\text{C}_6\text{F}_5)_3\text{-BQ-SiPhH}_2]^+$                               | -3110.795988                             | 0.275339                                    | 0.401739                                 |
| $[\text{B}(\text{C}_6\text{F}_5)_3\text{-BQ-SiPhH}_2]^{\cdot}$                         | -3111.103541                             | 0.276055                                    | 0.401664                                 |
| $[\text{B}(\text{C}_6\text{F}_5)_3\text{-BQ-SiPhH}_2]^-$                               | -3111.256659                             | 0.275389                                    | 0.400487                                 |
| $[\text{B}(\text{C}_6\text{F}_5)_3\text{-BQ-SiEt}_3]^+$                                | -3115.643494                             | 0.362232                                    | 0.496768                                 |
| $[\text{B}(\text{C}_6\text{F}_5)_3\text{-BQ-SiEt}_3]^{\cdot}$                          | -3115.946229                             | 0.363120                                    | 0.496856                                 |
| $[\text{B}(\text{C}_6\text{F}_5)_3\text{-BQ-SiEt}_3]^-$                                | -3116.098272                             | 0.363663                                    | 0.495484                                 |
| $[\text{B}(\text{C}_6\text{F}_5)_3\text{-BQ-Si}(\text{C}_6\text{Me}_5)_3]^+$           | -4161.207390                             | 0.834529                                    | 1.023795                                 |
| $[\text{B}(\text{C}_6\text{F}_5)_3\text{-BQ-Si}(\text{C}_6\text{Me}_5)_3]^{\cdot}$     | -4161.488592                             | 0.835144                                    | 1.023682                                 |
| $[\text{B}(\text{C}_6\text{F}_5)_3\text{-BQ-Si}(\text{C}_6\text{Me}_5)_3]^-$           | -4161.633638                             | 0.833398                                    | 1.022133                                 |
| $\text{B}(\text{C}_6\text{F}_5)_3\text{-Q-B}(\text{C}_6\text{F}_5)_3$                  | -4796.356887                             | 0.299854                                    | 0.472628                                 |
| $[\text{B}(\text{C}_6\text{F}_5)_3\text{-Q-B}(\text{C}_6\text{F}_5)_3]^-$              | -4796.556888                             | 0.298581                                    | 0.471791                                 |
| $[\text{B}(\text{C}_6\text{F}_5)_3\text{-Q-B}(\text{C}_6\text{F}_5)_3]^{2-}$           | -4796.609130                             | 0.297890                                    | 0.469771                                 |
| $\text{B}(\text{C}_6\text{F}_5)_3\text{-BQ-B}(\text{C}_6\text{F}_5)_2\text{Ph}$        | -4300.359748                             | 0.342991                                    | 0.508522                                 |
| $[\text{B}(\text{C}_6\text{F}_5)_3\text{-BQ-B}(\text{C}_6\text{F}_5)_2\text{Ph}]^-$    | -4300.553976                             | 0.343914                                    | 0.507669                                 |
| $[\text{B}(\text{C}_6\text{F}_5)_3\text{-BQ-B}(\text{C}_6\text{F}_5)_2\text{Ph}]^{2-}$ | -4300.601331                             | 0.342092                                    | 0.505609                                 |
| $\text{B}(\text{C}_6\text{F}_5)_3\text{-BQ-B}(\text{C}_6\text{F}_5)\text{Ph}_2$        | -3804.362703                             | 0.388823                                    | 0.544500                                 |
| $[\text{B}(\text{C}_6\text{F}_5)_3\text{-BQ-B}(\text{C}_6\text{F}_5)\text{Ph}_2]^-$    | -3804.549065                             | 0.389561                                    | 0.543572                                 |
| $[\text{B}(\text{C}_6\text{F}_5)_3\text{-BQ-B}(\text{C}_6\text{F}_5)\text{Ph}_2]^{2-}$ | -3804.587830                             | 0.387353                                    | 0.541295                                 |
| $\text{B}(\text{C}_6\text{F}_5)_3\text{-BQ-BPh}_3$                                     | -3308.363358                             | 0.434741                                    | 0.580504                                 |
| $[\text{B}(\text{C}_6\text{F}_5)_3\text{-BQ-BPh}_3]^-$                                 | -3308.544598                             | 0.434628                                    | 0.579495                                 |
| $[\text{B}(\text{C}_6\text{F}_5)_3\text{-BQ-BPh}_3]^{2-}$                              | -3308.578356                             | 0.433098                                    | 0.577310                                 |
| $\text{B}(\text{C}_6\text{F}_5)_3\text{-BQ-BEt}_3$                                     | -2851.236701                             | 0.362334                                    | 0.499018                                 |
| $[\text{B}(\text{C}_6\text{F}_5)_3\text{-BQ-BEt}_3]^-$                                 | -2851.411056                             | 0.368312                                    | 0.498021                                 |
| $[\text{B}(\text{C}_6\text{F}_5)_3\text{-BQ-BEt}_3]^{2-}$                              | -2851.428078                             | 0.366076                                    | 0.495543                                 |

**Table S15.** Computed energies for the optimized structures of the **LA<sub>1</sub>-HQ** adducts. All calculations were implemented using the M06-2X/6-311++G(d,p)//M06-2X/6-31G(d,p) level of theory in MeCN at 298K.

| <b>LA<sub>1</sub>-HQ</b>                                             | <b>Electronic Energies Gas Phase (Hartrees)</b> | <b>Free Energy Correction Gas Phase (Hartrees)</b> | <b>Enthalpy Correction Gas Phase (Hartrees)</b> |
|----------------------------------------------------------------------|-------------------------------------------------|----------------------------------------------------|-------------------------------------------------|
| [HQ] <sup>+</sup>                                                    | -381.6162449                                    | 0.068146                                           | 0.106186                                        |
| [HQ] <sup>•</sup>                                                    | -381.8963541                                    | 0.066473                                           | 0.104643                                        |
| [HQ] <sup>-</sup>                                                    | -381.9486846                                    | 0.063862                                           | 0.103373                                        |
| [SiPhH <sub>2</sub> -HQ] <sup>2+</sup>                               | -903.4715216                                    | 0.165995                                           | 0.224403                                        |
| [SiPhH <sub>2</sub> -HQ] <sup>•+</sup>                               | -903.9200251                                    | 0.166558                                           | 0.225159                                        |
| SiPhH <sub>2</sub> -HQ                                               | -904.1891874                                    | 0.165959                                           | 0.224354                                        |
| [SiEt <sub>3</sub> -HQ] <sup>2+</sup>                                | -908.3206774                                    | 0.251239                                           | 0.319486                                        |
| [SiEt <sub>3</sub> -HQ] <sup>•+</sup>                                | -908.7649338                                    | 0.252785                                           | 0.320180                                        |
| SiEt <sub>3</sub> -HQ                                                | -909.0296311                                    | 0.252895                                           | 0.319304                                        |
| [Si(C <sub>6</sub> Me <sub>5</sub> ) <sub>3</sub> -HQ] <sup>2+</sup> | -1954.94447                                     | 0.718256                                           | 0.843651                                        |
| [Si(C <sub>6</sub> Me <sub>5</sub> ) <sub>3</sub> -HQ] <sup>•+</sup> | -1954.487985                                    | 0.720181                                           | 0.846657                                        |
| Si(C <sub>6</sub> Me <sub>5</sub> ) <sub>3</sub> -HQ                 | -1954.730343                                    | 0.723617                                           | 0.846695                                        |
| [B(C <sub>6</sub> F <sub>5</sub> ) <sub>3</sub> -HQ] <sup>+</sup>    | -2589.124644                                    | 0.188224                                           | 0.294148                                        |
| [B(C <sub>6</sub> F <sub>5</sub> ) <sub>3</sub> -HQ] <sup>•</sup>    | -2589.450099                                    | 0.189259                                           | 0.295104                                        |
| [B(C <sub>6</sub> F <sub>5</sub> ) <sub>3</sub> -HQ] <sup>-</sup>    | -2589.601155                                    | 0.188144                                           | 0.293776                                        |
| [B(C <sub>6</sub> F <sub>5</sub> ) <sub>2</sub> Ph-HQ] <sup>+</sup>  | -2093.159331                                    | 0.234419                                           | 0.331444                                        |
| [B(C <sub>6</sub> F <sub>5</sub> ) <sub>2</sub> Ph-HQ] <sup>•</sup>  | -2093.448785                                    | 0.233959                                           | 0.330915                                        |
| [B(C <sub>6</sub> F <sub>5</sub> ) <sub>2</sub> Ph-HQ] <sup>-</sup>  | -2093.595049                                    | 0.233651                                           | 0.329762                                        |
| [B(C <sub>6</sub> F <sub>5</sub> )Ph <sub>2</sub> -HQ] <sup>+</sup>  | -1597.156453                                    | 0.276741                                           | 0.367749                                        |
| [B(C <sub>6</sub> F <sub>5</sub> )Ph <sub>2</sub> -HQ] <sup>•</sup>  | -1597.449060                                    | 0.279216                                           | 0.366861                                        |
| [B(C <sub>6</sub> F <sub>5</sub> )Ph <sub>2</sub> -HQ] <sup>-</sup>  | -1597.583928                                    | 0.278319                                           | 0.365453                                        |
| [BPh <sub>3</sub> -HQ] <sup>+</sup>                                  | -1101.173362                                    | 0.326034                                           | 0.404116                                        |
| [BPh <sub>3</sub> -HQ] <sup>•</sup>                                  | -1101.447173                                    | 0.324550                                           | 0.402797                                        |
| [BPh <sub>3</sub> -HQ] <sup>-</sup>                                  | -1101.575245                                    | 0.323654                                           | 0.401371                                        |
| [BEt <sub>3</sub> -HQ] <sup>+</sup>                                  | -644.0283202                                    | 0.253846                                           | 0.321997                                        |
| [BEt <sub>3</sub> -HQ] <sup>•</sup>                                  | -644.3215081                                    | 0.257782                                           | 0.320425                                        |
| [BEt <sub>3</sub> -HQ] <sup>-</sup>                                  | -644.4330483                                    | 0.257759                                           | 0.319785                                        |

#### 14) Sample Calculation of Redox Potential for Benzoquinone



$$\begin{aligned}
 G_Q &= -239305.9292 \text{ kcal/mol} \\
 G_{Q\cdot-} &= -239397.7387 \text{ kcal/mol} \\
 G_{Fc} &= -320499.3504 \text{ kcal/mol} \\
 G_{Fc+} &= -320385.2878 \text{ kcal/mol}
 \end{aligned}$$

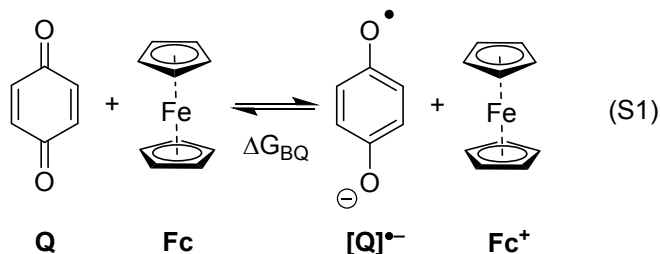

$$\Delta G_{BQ} = [Products] - [Reactants] = [G_{Q\cdot-} + G_{Fc+}] - [G_Q + G_{Fc}] = 22.2531 \text{ kcal/mol}$$

This free energy value can now be converted to volts using Equation S2:

$$\Delta G = -nFE^\circ \quad (\text{S2})$$

Where  $\Delta G = \Delta G_{BQ}$ ,  $n$  = the number of electrons transferred (1 electron for this reaction),  $F$  is Faraday's constant (23.061 kcal/volt), and  $E^\circ$  is the reduction potential in volts, solving for  $E^\circ$  and inserting the values yields the following:

$$E^\circ = - \frac{\left(22.2531 \frac{\text{kcal}}{\text{mol}}\right)}{(1) \left(23.061 \frac{\text{kcal}}{\text{mol} \cdot \text{volt}}\right)} = -0.964 \text{ V}$$

Since the reduction potential of ferrocenium ( $Fc^+$ ) is defined as 0.0 V, no further correction of the reduction potential is needed.

### 15) Sample Calculation of $pK_a$ for Protonated Benzoquinone

$$G_Q = -239305.9292 \text{ kcal/mol}$$

$$G_{HQ^+} = -239550.529 \text{ kcal/mol}$$

$$G_{Py} = -155737.9626 \text{ kcal/mol}$$

$$G_{PyH^+} = -156012.9224 \text{ kcal/mol}$$

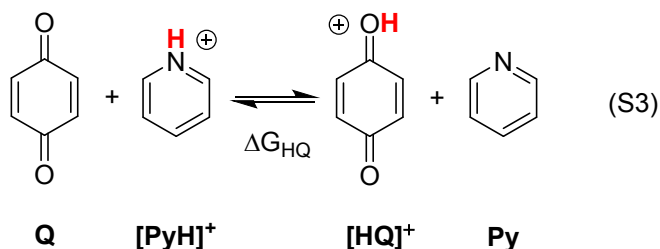

$$\Delta G_{HQ} = [Products] - [Reactants] = [G_{HQ^+} + G_{Py}] - [G_Q + G_{PyH^+}] = 30.36 \text{ kcal/mol}$$

This free energy value can now be converted to an equilibrium constant using Equation S4:

$$\Delta G_{HQ} = -RT \ln(K_{HQ}) \text{ (S4)}$$

Where  $\Delta G_{HQ}$  is the change in free energy for the reaction of benzoquinone with pyridinium,  $R = 1.9871 \text{ kcal K}^{-1} \text{ mol}^{-1}$ ,  $T$  is ambient temperature (298.15 K), and  $K_{HQ}$  is the equilibrium constant for the reaction of benzoquinone with pyridinium, solving for  $K_{HQ}$  and inserting the values yields the following:

$$K_{HQ} = e^{-\left(\frac{\Delta G_{HQ}}{RT}\right)} = e^{-\left(\frac{\left(30.36 \frac{\text{kcal}}{\text{mol}}\right)\left(1000 \frac{\text{cal}}{\text{kcal}}\right)}{\left(1.9871 \frac{\text{cal}}{\text{mol} \cdot \text{K}}\right)(298.15 \text{ K})}\right)} = 5.556 \times 10^{-23}$$

To determine the  $K_a$  value for  $[HQ]^+$ , the  $K_a$  expression for pyridinium needs to be subtracted out, as follows:

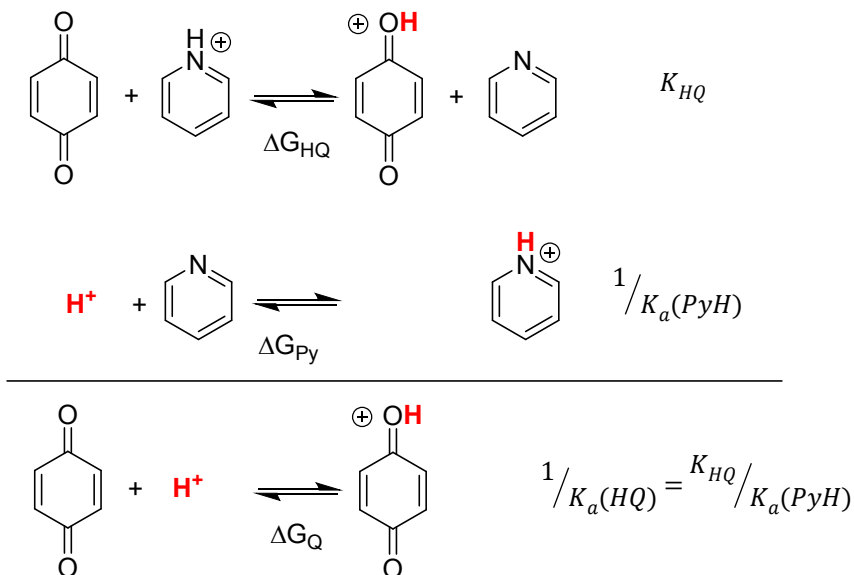

Solving for  $K_a(HQ)$  results in Equation S5:

$$K_a(HQ) = \frac{K_a(PyH)}{K_{HQ}} \quad (S5)$$

$K_a(PyH)$  is determined by converting the  $pK_a$  of pyridinium (12.33 in acetonitrile)<sup>3</sup> using Equation S6:

$$K_a = 10^{(-pK_a)} \quad (S6)$$

Which results in a  $K_a(Py)$  of  $4.677 \times 10^{-13}$  for pyridinium. Using the values for  $K_a(PyH)$  and  $K_{HQ}$  the value for  $K_a(HQ)$  can be determined as follows:

$$K_a(HQ) = \frac{K_a(PyH)}{K_{HQ}} = \frac{4.677 \times 10^{-13}}{5.556 \times 10^{-23}} = 5.691 \times 10^9$$

To determine the  $pK_a$  value for protonated benzoquinone, the Equation S7 can be used:

$$pK_a = -\log(K_a) \quad (S7)$$

Using the values for the protonated benzoquinone the  $pK_a$  can be determined for **[HQ]<sup>+</sup>** from the following:

$$pK_a(HQ) = -\log(K_a(HQ)) = -\log(5.691 \times 10^9) = 9.93$$

### 16) Sample Calculation of the Ability to transfer a Hydrogen Atom from Protonated Semiquinone

$$G_Q = -239305.9292 \text{ kcal/mol}$$

$$G_{HQ\cdot} = -239679.2155 \text{ kcal/mol}$$

$$G_{TEMPO} = -303343.7728 \text{ kcal/mol}$$

$$G_{TEMPOH} = -303721.7586 \text{ kcal/mol}$$

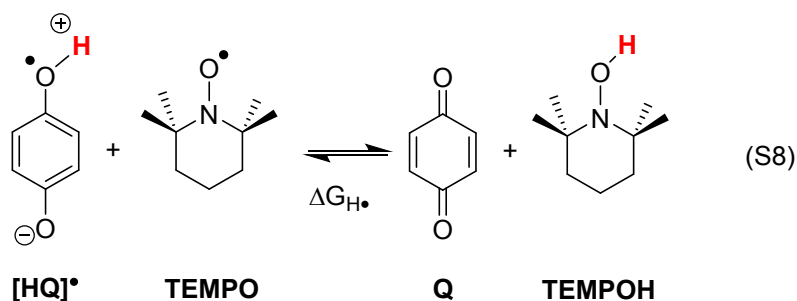

$$\Delta G_{HQ} = [Products] - [Reactants] = [G_Q + G_{TEMPOH}] - [G_{HQ\cdot} + G_{TEMPO}] = -4.70 \text{ kcal/mol}$$

This free energy for hydrogen atom transfer from [HQ]• can then be determined from the following equilibrium expressions:

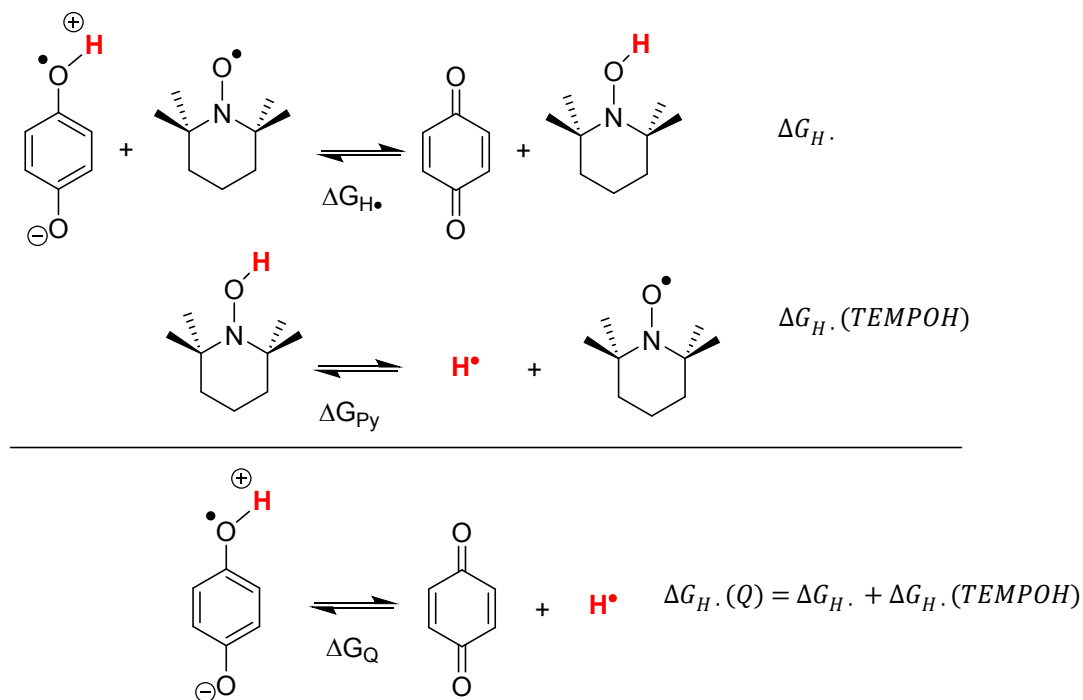

Given that  $\Delta G_{H\cdot}(TEMPOH)$  is 66.5 kcal/mol,<sup>4</sup>  $\Delta G_{H\cdot}(Q)$  can be determined to be **61.80 kcal/mol**

## 17) Plots Showing the Locations of the Frontier Molecular Orbitals

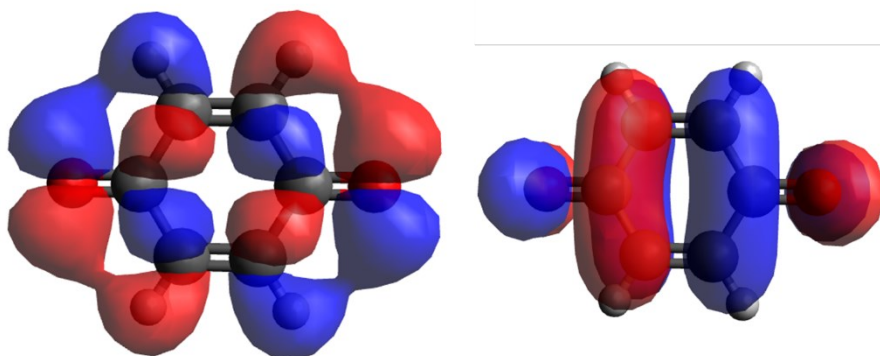

**Figure 26.** HOMO (left) and LUMO (right) images of benzoquinone (**Q**). Isovalue = 0.02 e<sup>-</sup>/a.u.

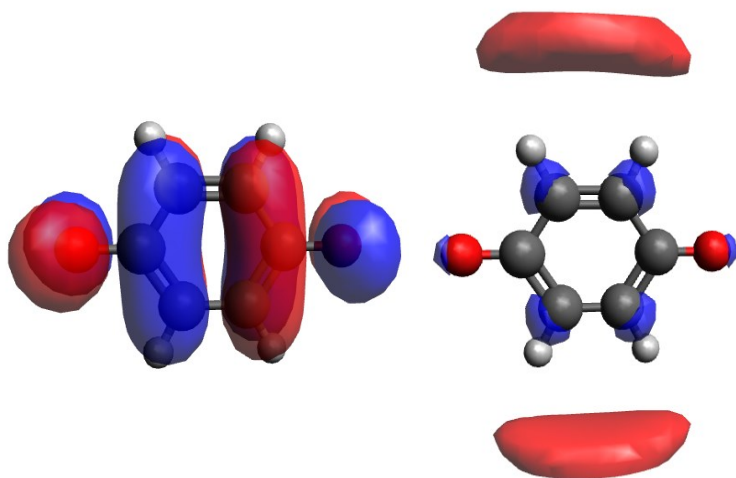

**Figure S27.** HOMO (left) and LUMO (right) images of hydroquinone dianion (**[Q]<sup>2-</sup>**). Isovalue = 0.02 e<sup>-</sup>/a.u.

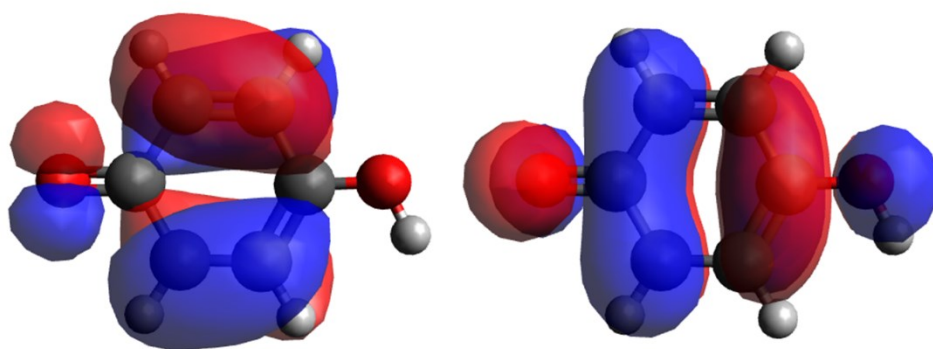

**Figure S28.** HOMO (left) and LUMO (right) images of  $[\text{HQ}]^+$ . Isovalue =  $0.02 \text{ e}^-/\text{a.u.}$

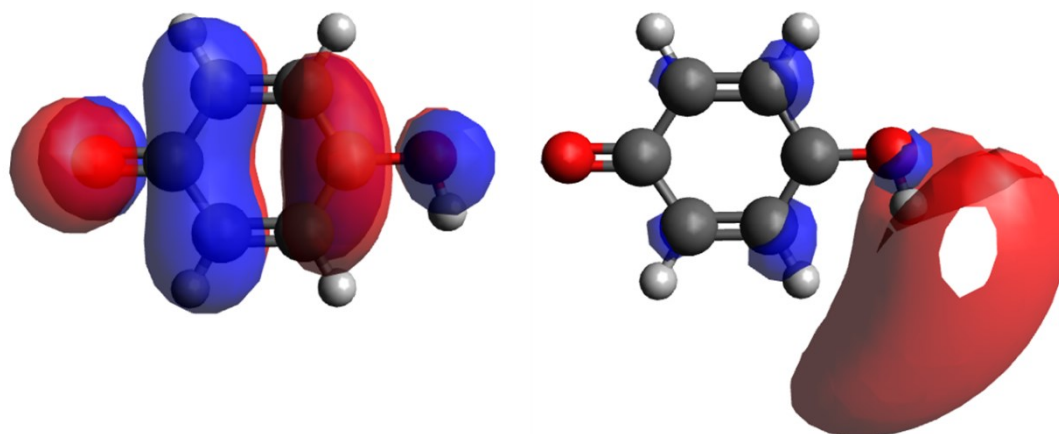

**Figure S29.** HOMO (left) and LUMO (right) images of  $[\text{HQ}]^-$ . Isovalue =  $0.02 \text{ e}^-/\text{a.u.}$

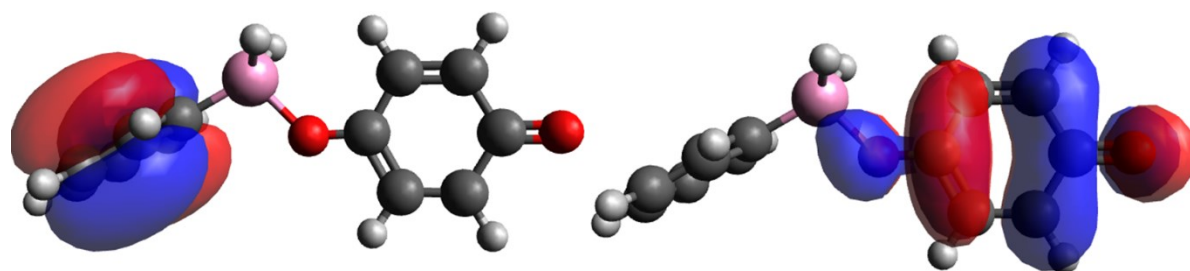

**Figure S30.** HOMO (left) and LUMO (right) images of  $[\text{SiH}_2\text{Ph-Q}]^+$ . Isovalue =  $0.02 \text{ e}^-/\text{a.u.}$

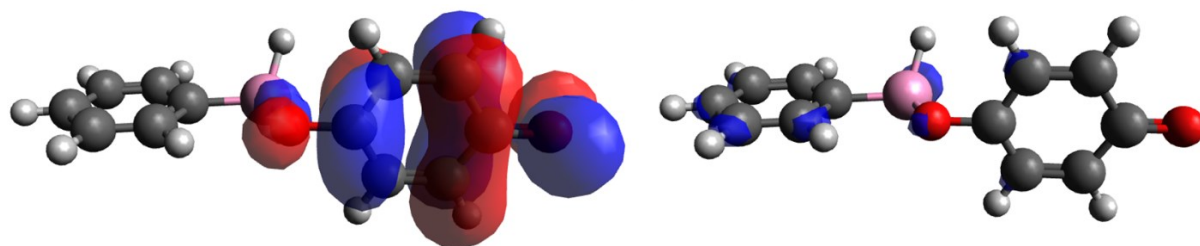

F

**Figure S31.** HOMO (left) and LUMO (right) images of [SiH<sub>2</sub>Ph-Q]<sup>-</sup>. Isovalue = 0.02 e<sup>-</sup>/a.u.

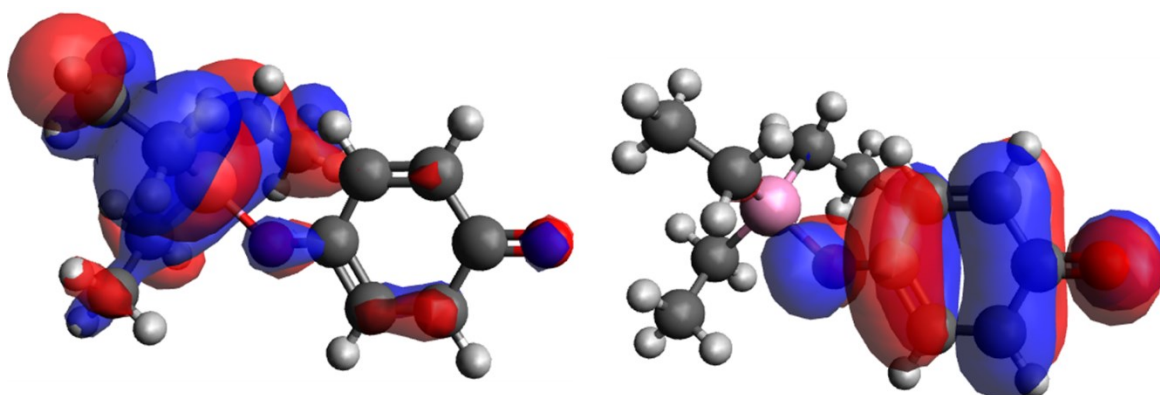

**Figure S32.** HOMO (left) and LUMO (right) images of [SiEt<sub>3</sub>-Q]<sup>+</sup>. Isovalue = 0.02 e<sup>-</sup>/a.u.

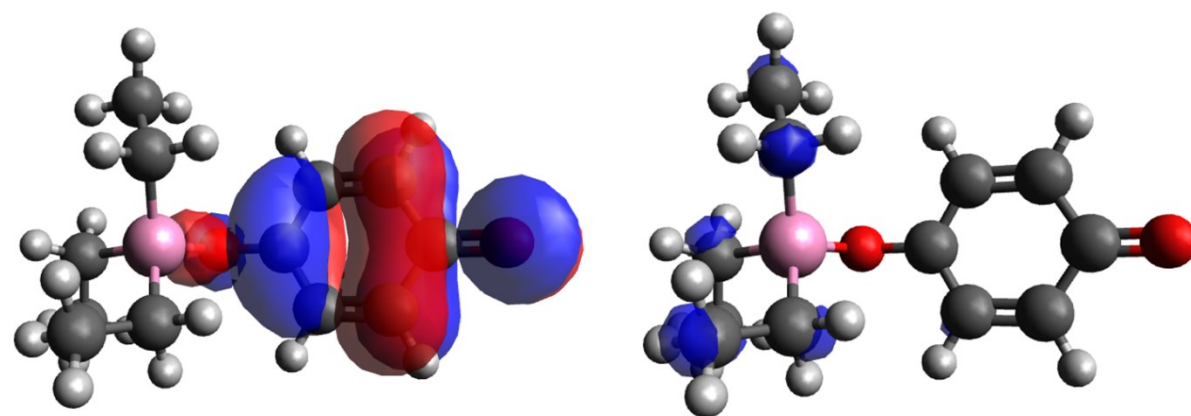

**Figure S33.** HOMO (left) and LUMO (right) images of [SiEt<sub>3</sub>-Q]<sup>-</sup>. Isovalue = 0.02 e<sup>-</sup>/a.u.

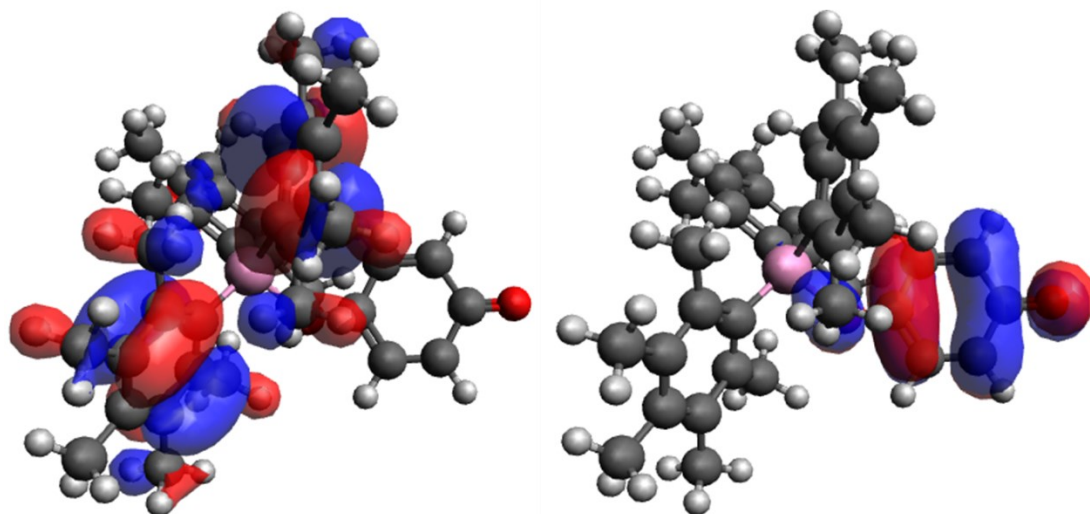

**Figure S34.** HOMO (left) and LUMO (right) images of  $[\text{Si}(\text{C}_6\text{Me}_5)_3\text{-Q}]^+$ . Isovalue = 0.02  $e^-/\text{a.u.}$

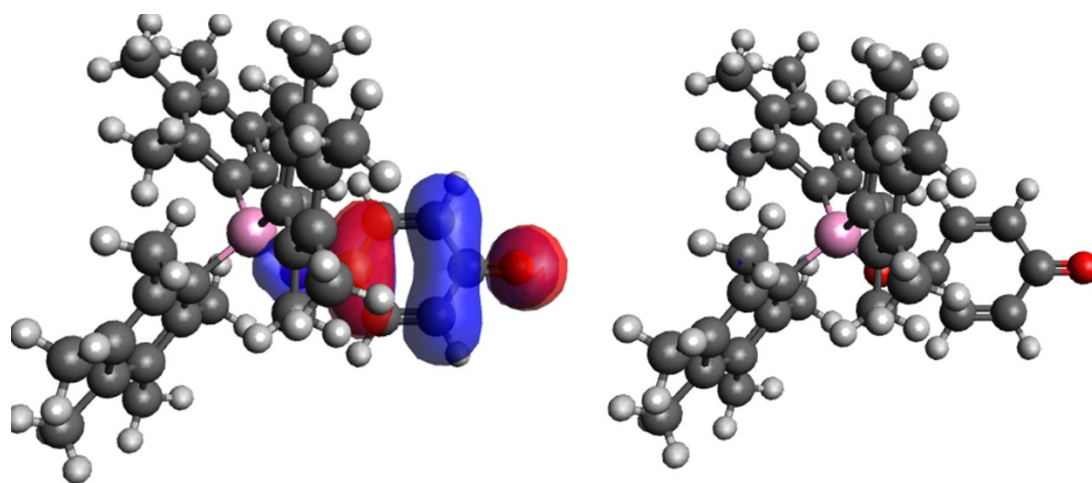

**Figure S35.** HOMO (left) and LUMO (right) images of  $[\text{Si}(\text{C}_6\text{Me}_5)_3\text{-Q}]^-$ . Isovalue = 0.02  $e^-/\text{a.u.}$



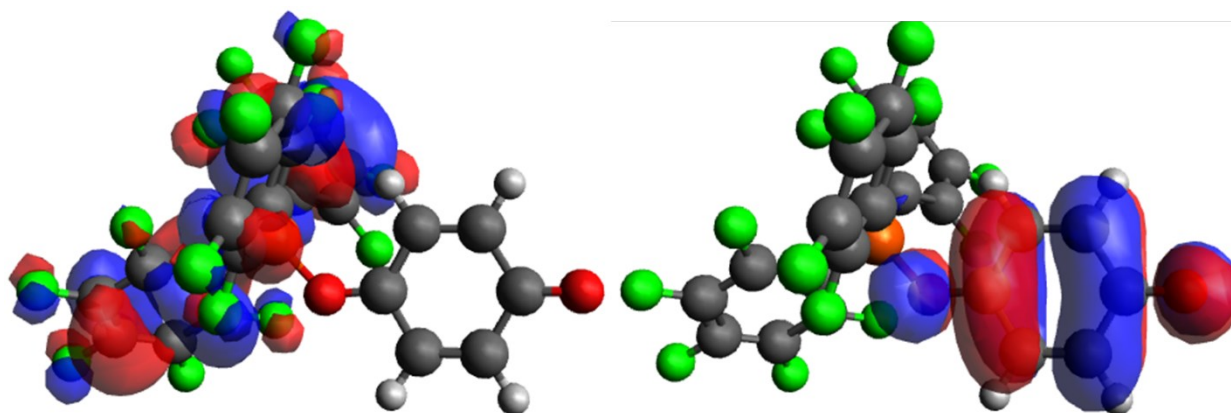

**Figure S36.** HOMO (left) and LUMO (right) images of  $\text{B}(\text{C}_6\text{F}_5)_3\text{-Q}$ . Isovalue = 0.02  $e^-/\text{a.u.}$

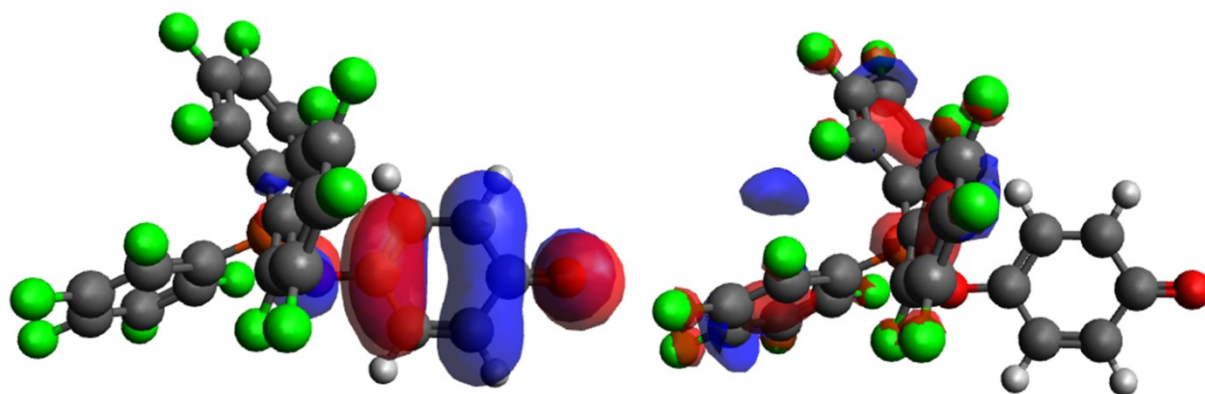

**Figure S37.** HOMO (left) and LUMO (right) images of  $[\text{B}(\text{C}_6\text{F}_5)_3\text{-Q}]^{2-}$ . Isovalue = 0.02  $e^-/\text{a.u.}$

F

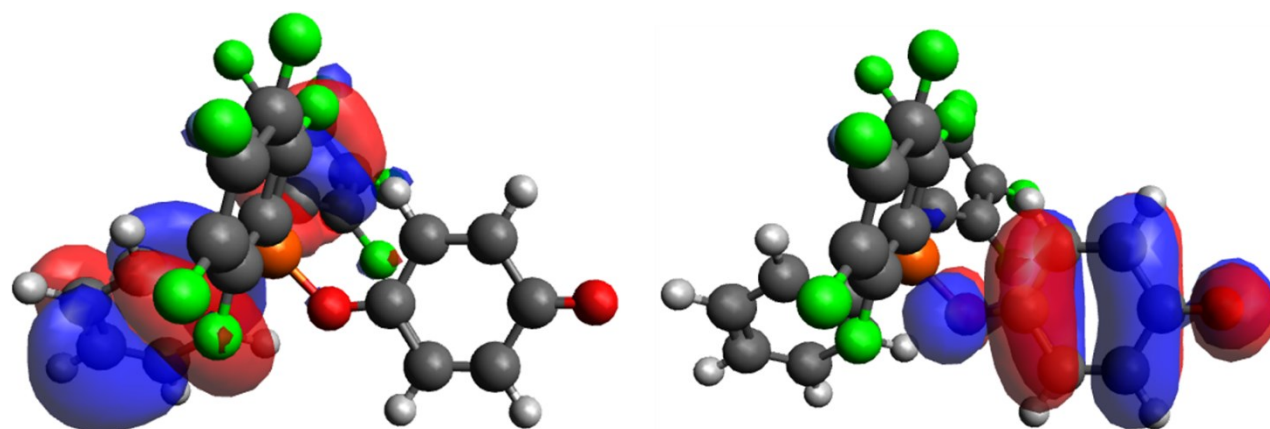

**Figure S38.** HOMO (left) and LUMO (right) images of  $\text{B}(\text{C}_6\text{F}_5)_2\text{Ph-Q}$ . Isovalue = 0.02  $e^-/\text{a.u.}$

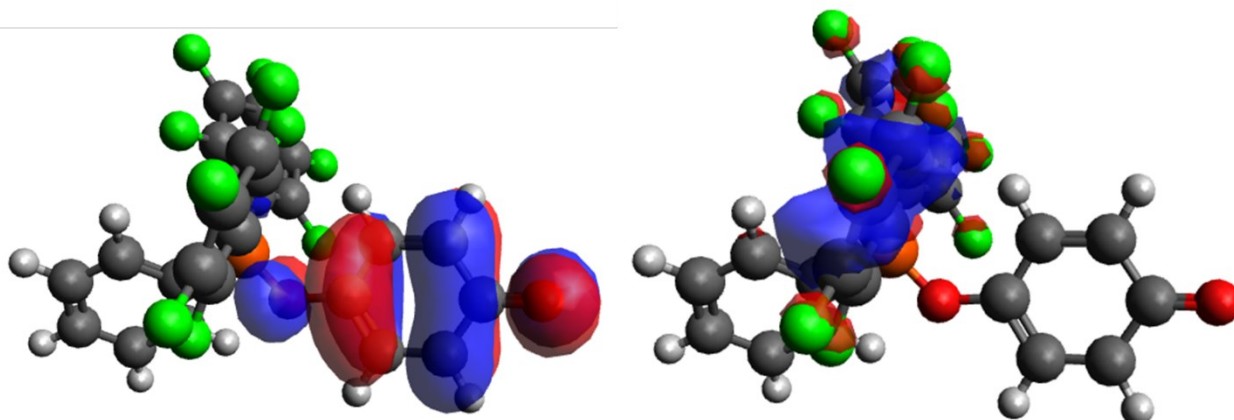

**Figure S39.** HOMO (left) and LUMO (right) images of  $[\text{B}(\text{C}_6\text{F}_5)_2\text{Ph-Q}]^{2-}$ . Isovalue = 0.02  $e^-/\text{a.u.}$

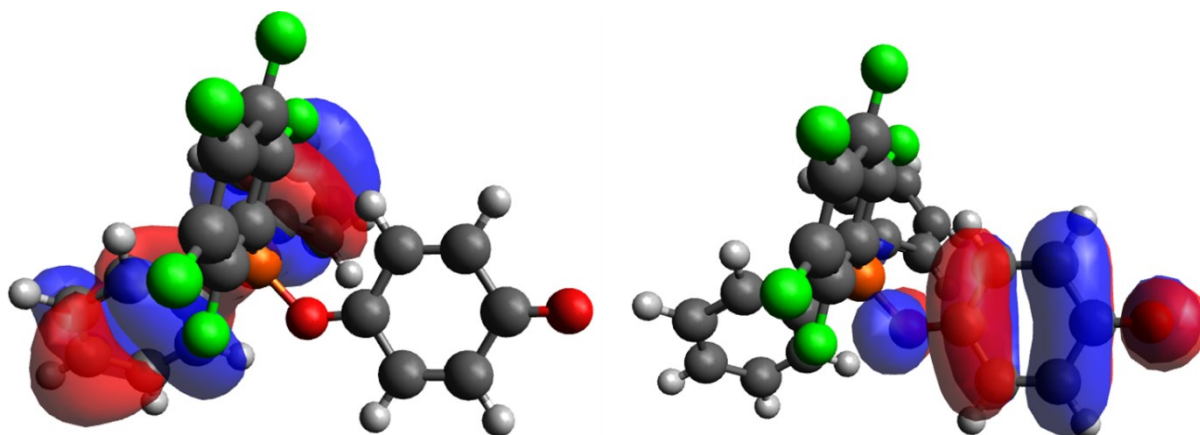

**Figure S40.** HOMO (left) and LUMO (right) images of  $\text{B}(\text{C}_6\text{F}_5)\text{Ph}_2\text{-Q}$ . Isovalue = 0.02  $e^-/\text{a.u.}$

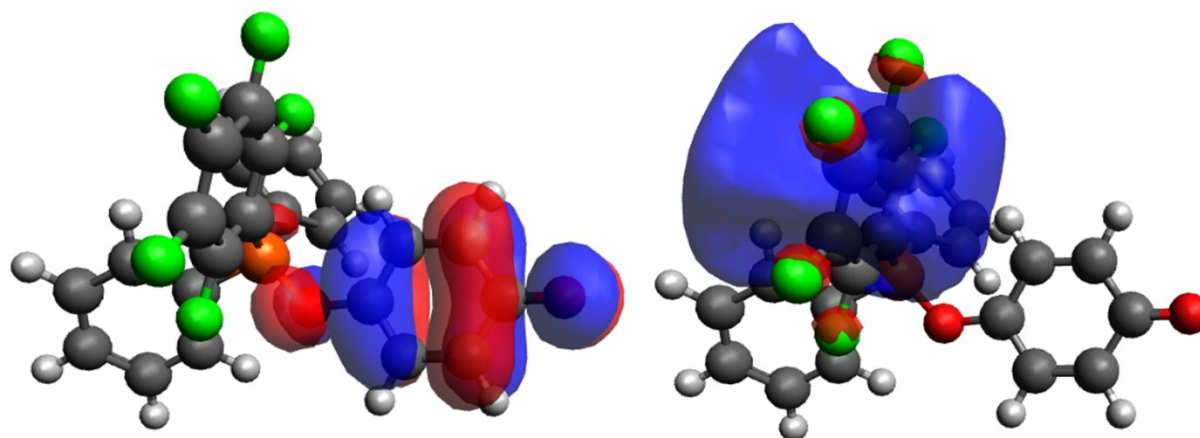

**Figure S41.** HOMO (left) and LUMO (right) images of  $[\text{B}(\text{C}_6\text{F}_5)\text{Ph}_2\text{-Q}]^{2-}$ . Isovalue = 0.02  $e^-/\text{a.u.}$

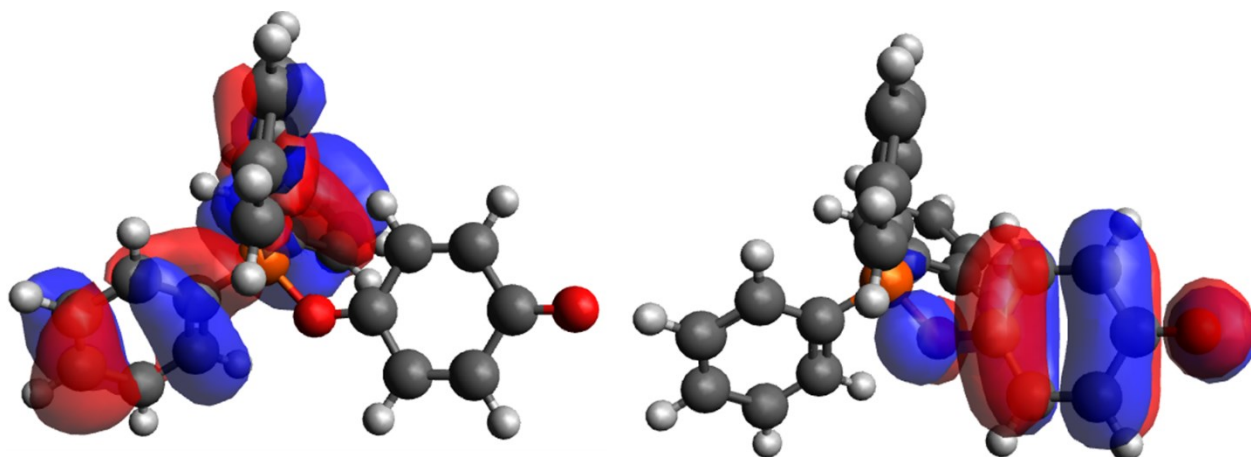

**Figure S42.** HOMO (left) and LUMO (right) images of **BPh<sub>3</sub>-Q**. Isovalue = 0.02 e<sup>-</sup>/a.u.

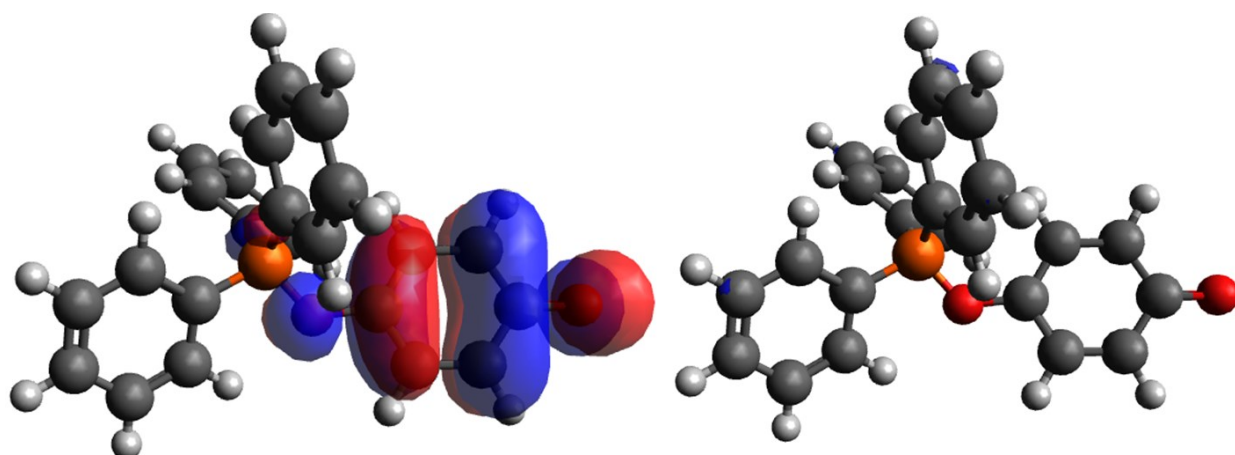

**Figure S43.** HOMO (left) and LUMO (right) images of **[BPh<sub>3</sub>-Q]<sup>2-</sup>**. Isovalue = 0.02 e<sup>-</sup>/a.u.

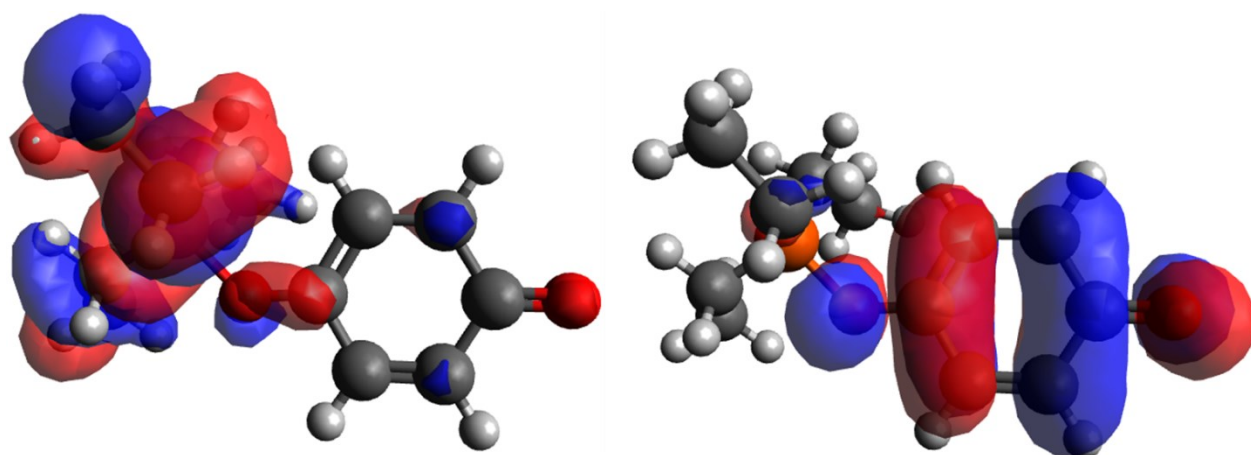

**Figure S44.** HOMO (left) and LUMO (right) images of **BEt<sub>3</sub>-Q**. Isovalue = 0.02 e<sup>-</sup>/a.u.

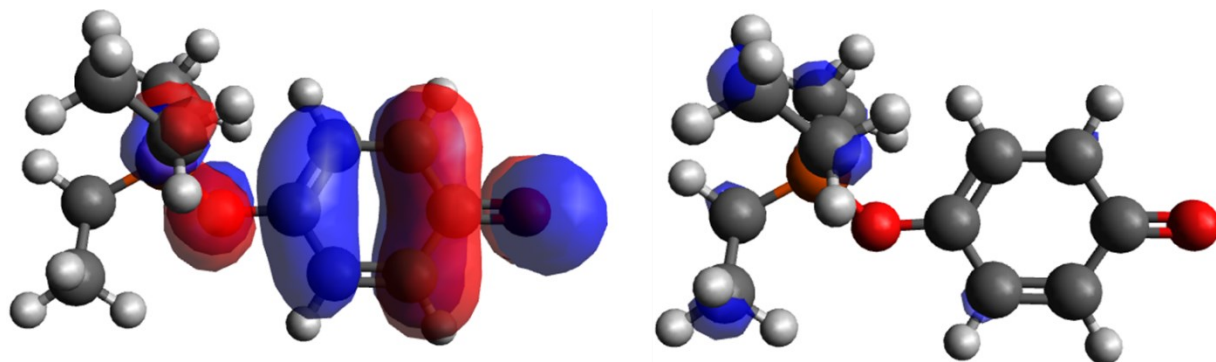

**Figure S45.** HOMO (left) and LUMO (right) images of [BEt<sub>3</sub>-Q]<sup>2-</sup>. Isovalue = 0.02 e<sup>-</sup>/a.u.

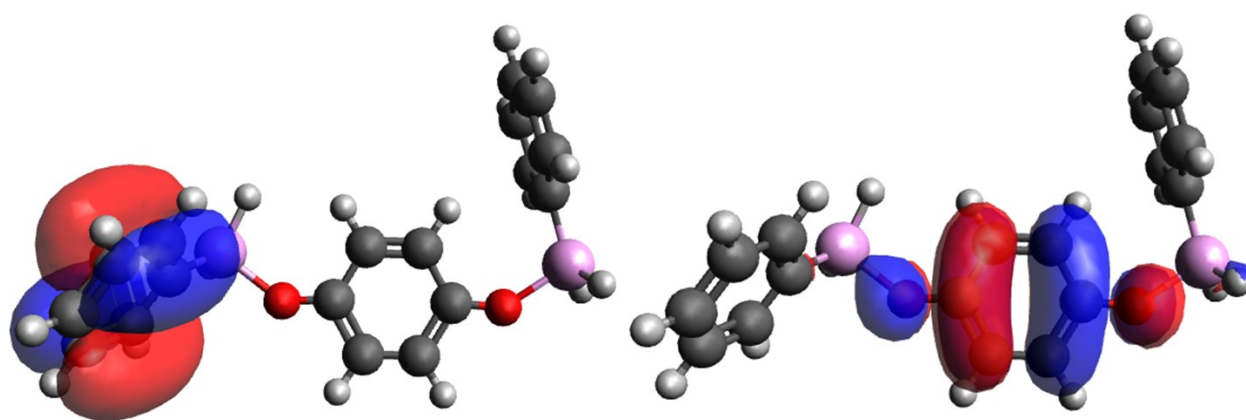

**Figure S46.** HOMO (left) and LUMO (right) images of [SiH<sub>2</sub>Ph-Q-SiH<sub>2</sub>Ph]<sup>2+</sup>. Isovalue = 0.02 e<sup>-</sup>/a.u.

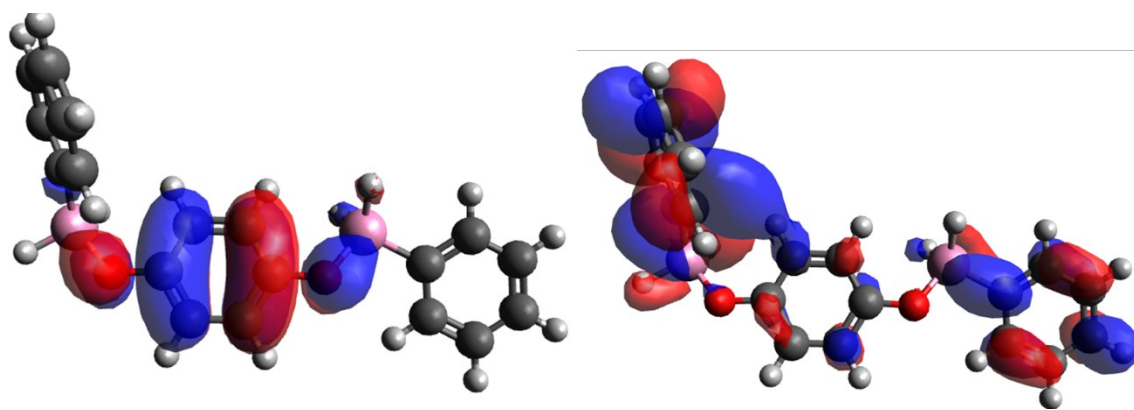

**Figure S47.** HOMO (left) and LUMO (right) images of SiH<sub>2</sub>Ph-Q-SiH<sub>2</sub>Ph. Isovalue = 0.02 e<sup>-</sup>/a.u.

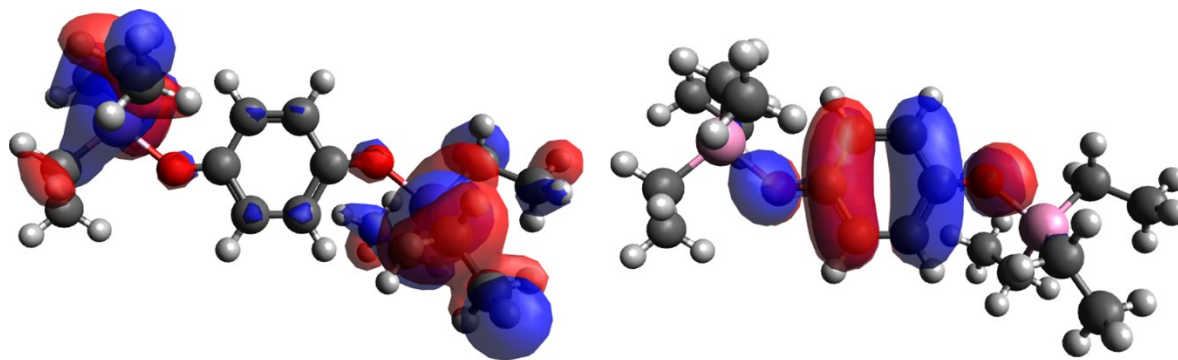

**Figure S48.** HOMO (left) and LUMO (right) images of  $[\text{SiEt}_3\text{-Q-SiEt}_3]^{2+}$ . Isovalue = 0.02  $e^-/\text{a.u.}$

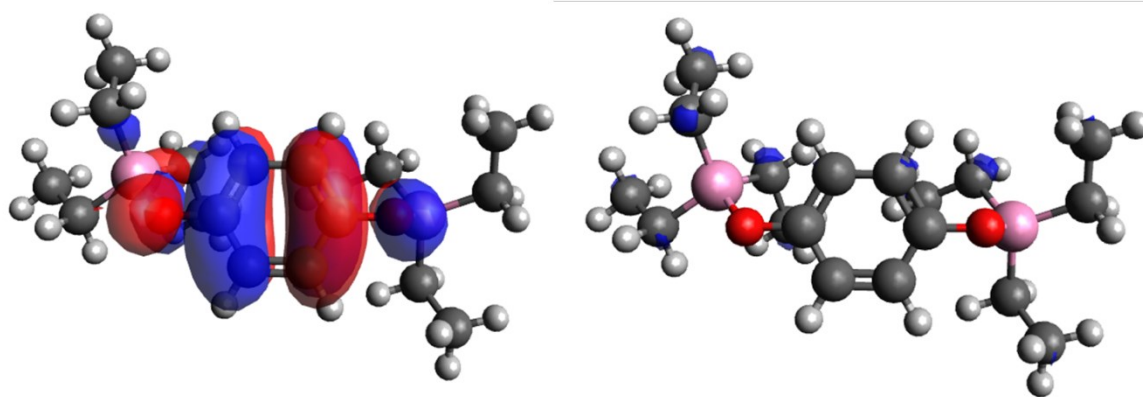

**Figure S49.** HOMO (left) and LUMO (right) images of  $\text{SiEt}_3\text{-Q-SiEt}_3$ . Isovalue = 0.02  $e^-/\text{a.u.}$

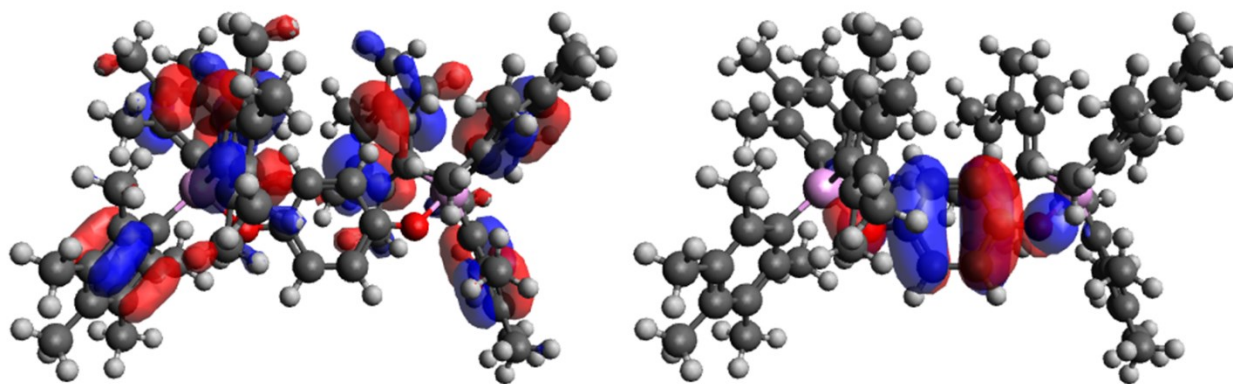

**Figure S50.** HOMO (left) and LUMO (right) images of  $[\text{Si}(\text{C}_6\text{Me}_5)_3\text{-Q-Si}(\text{C}_6\text{Me}_5)_3]^{2+}$ . Isovalue = 0.02  $e^-/\text{a.u.}$

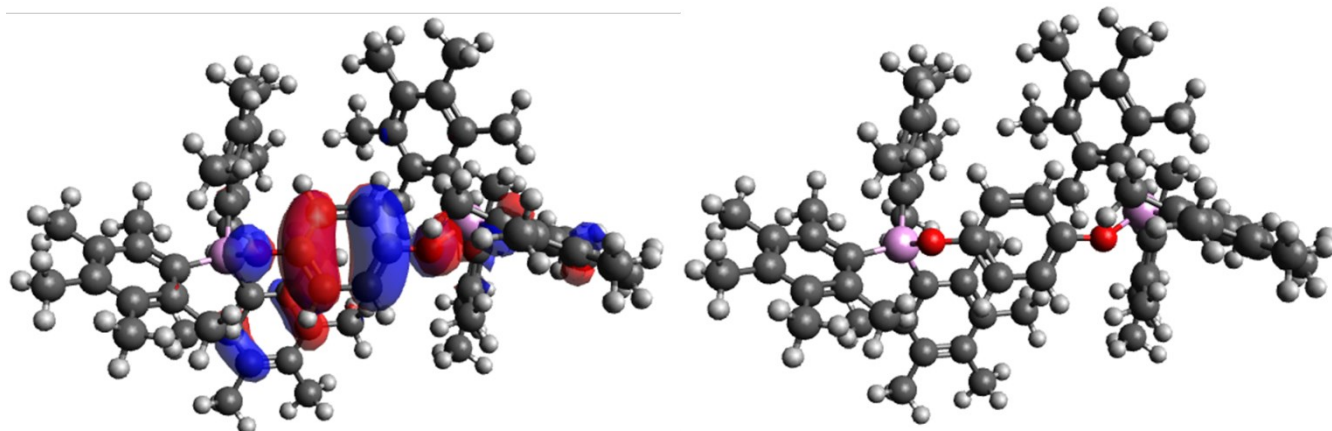

**Figure S51.** HOMO (left) and LUMO (right) images of  $\text{Si}(\text{C}_6\text{Me}_5)_3\text{-Q-Si}(\text{C}_6\text{Me}_5)_3$ . Isovalue =  $0.02 \text{ e}^-/\text{a.u.}$

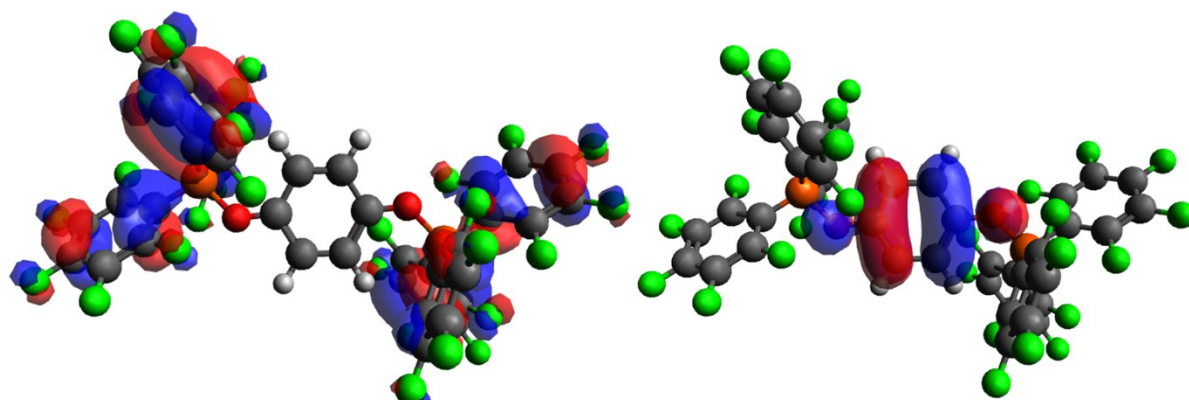

**Figure S52.** HOMO (left) and LUMO (right) images of  $\text{B}(\text{C}_6\text{F}_5)_3\text{-Q-B}(\text{C}_6\text{F}_5)_3$ . Isovalue =  $0.02 \text{ e}^-/\text{a.u.}$

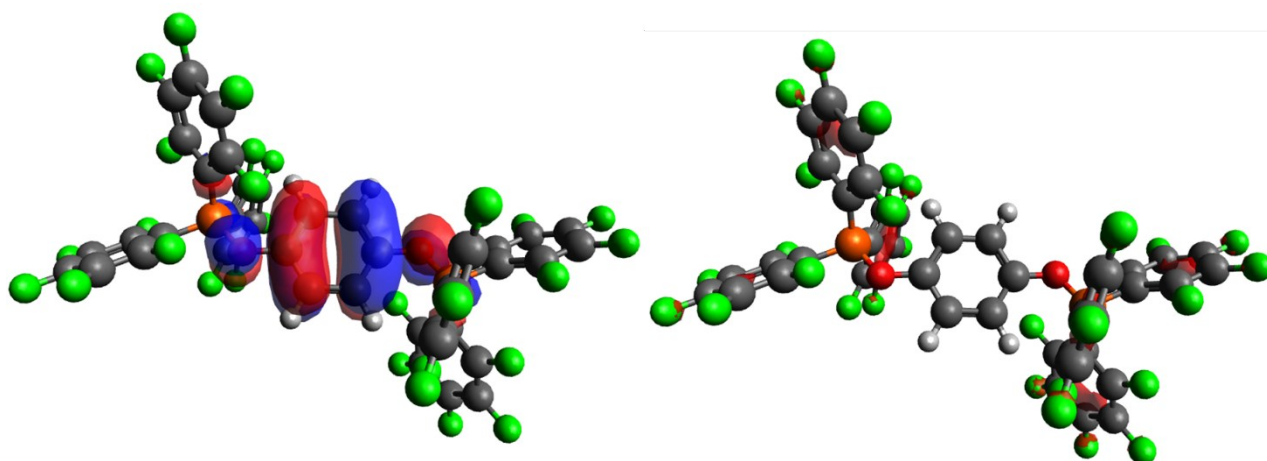

**Figure S53.** HOMO (left) and LUMO (right) images of  $[\text{B}(\text{C}_6\text{F}_5)_3\text{-Q-B}(\text{C}_6\text{F}_5)_3]^{2-}$ . Isovalue =  $0.02 \text{ e}^-/\text{a.u.}$

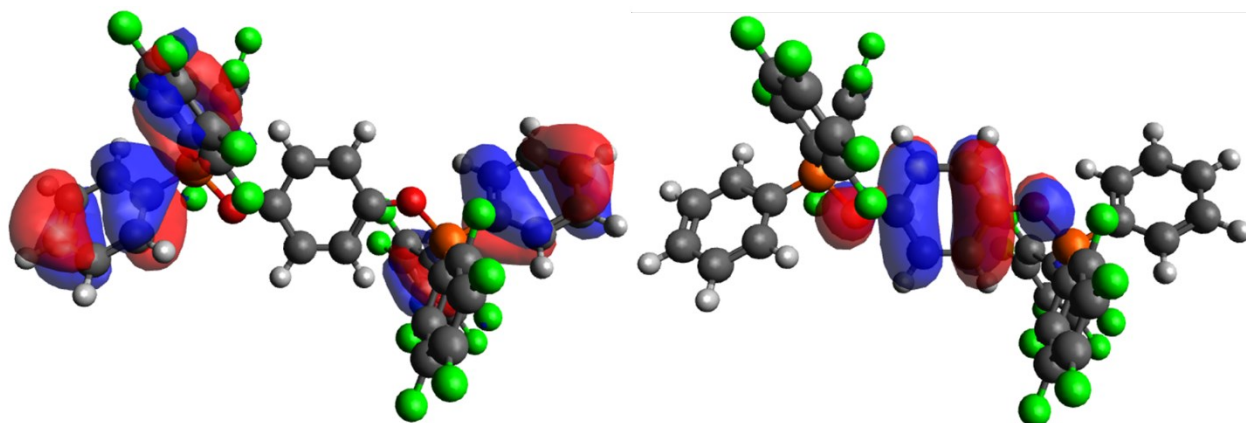

**Figure S54.** HOMO (left) and LUMO (right) images of  $\text{B}(\text{C}_6\text{F}_5)_2\text{Ph-Q-B}(\text{C}_6\text{F}_5)_2\text{Ph}$ . Isovalue =  $0.02 \text{ e}^-/\text{a.u.}$

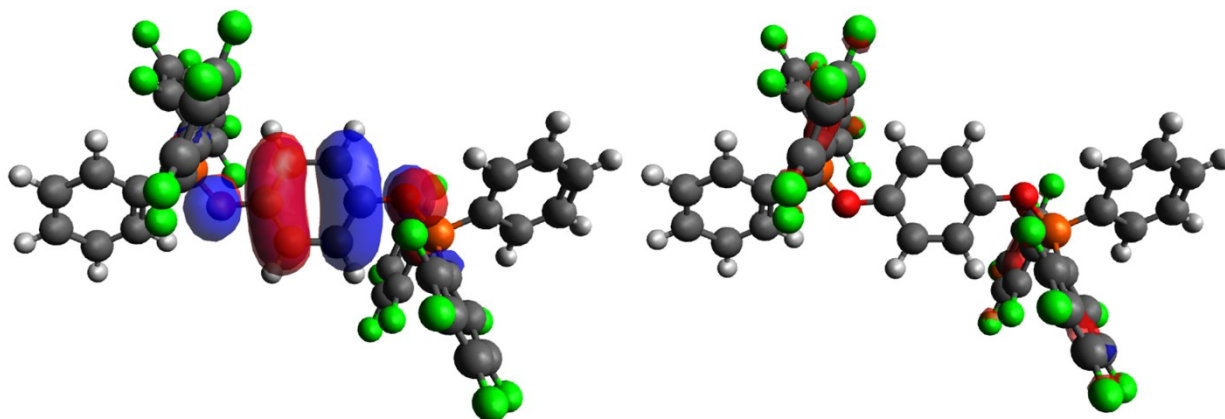

**Figure S55.** HOMO (left) and LUMO (right) images of  $[\text{B}(\text{C}_6\text{F}_5)_2\text{Ph-Q-B}(\text{C}_6\text{F}_5)_2\text{Ph}]^{2-}$ . Isovalue =  $0.02 \text{ e}^-/\text{a.u.}$

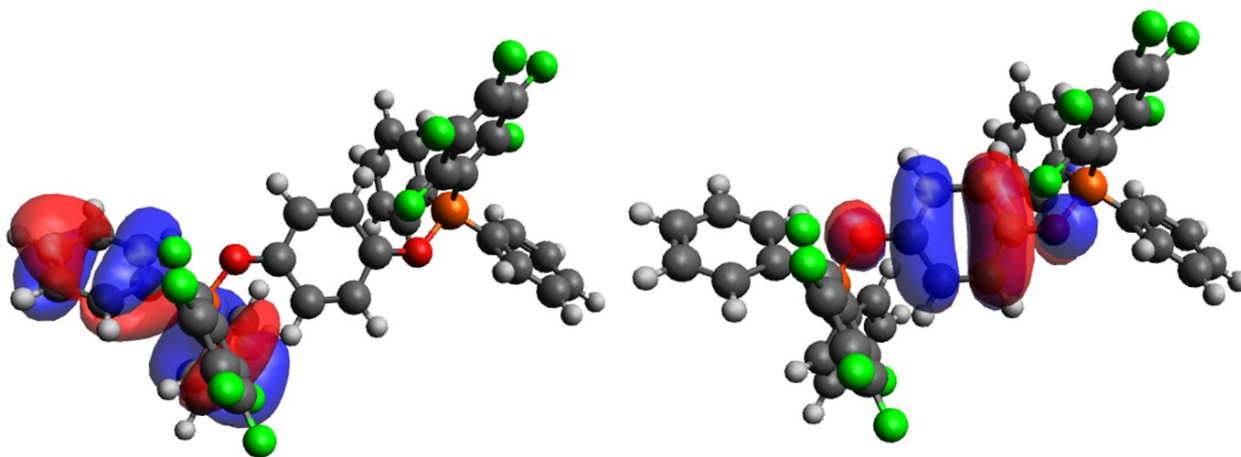

**Figure S56.** HOMO (left) and LUMO (right) images of  $\text{B}(\text{C}_6\text{F}_5)\text{Ph}_2\text{-Q-B}(\text{C}_6\text{F}_5)\text{Ph}_2$ . Isovalue =  $0.02 \text{ e}^-/\text{a.u.}$

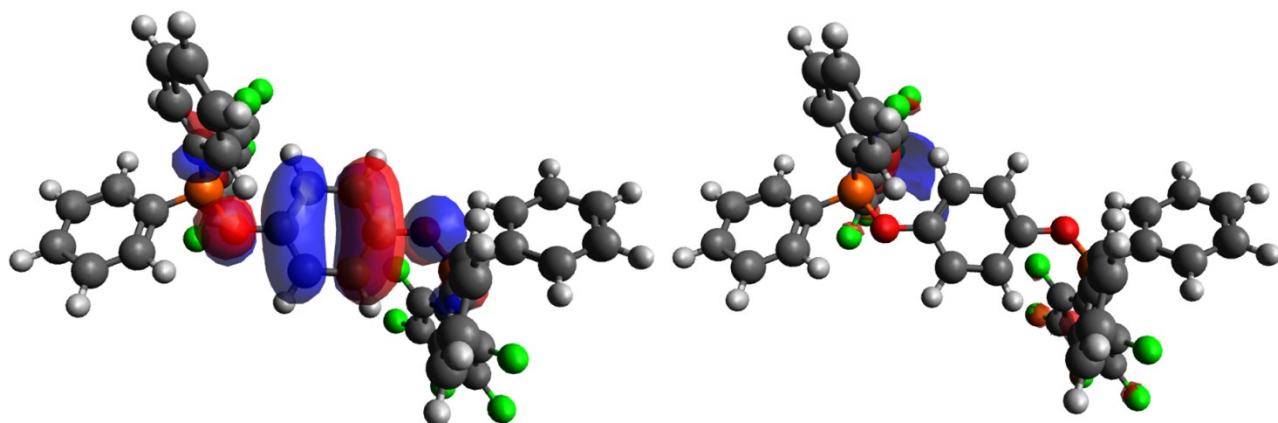

**Figure S57.** HOMO (left) and LUMO (right) images of  $[\text{B}(\text{C}_6\text{F}_5)\text{Ph}_2\text{-Q-B}(\text{C}_6\text{F}_5)\text{Ph}_2]^{2-}$ . Isovalue = 0.02  $e^-/\text{a.u.}$

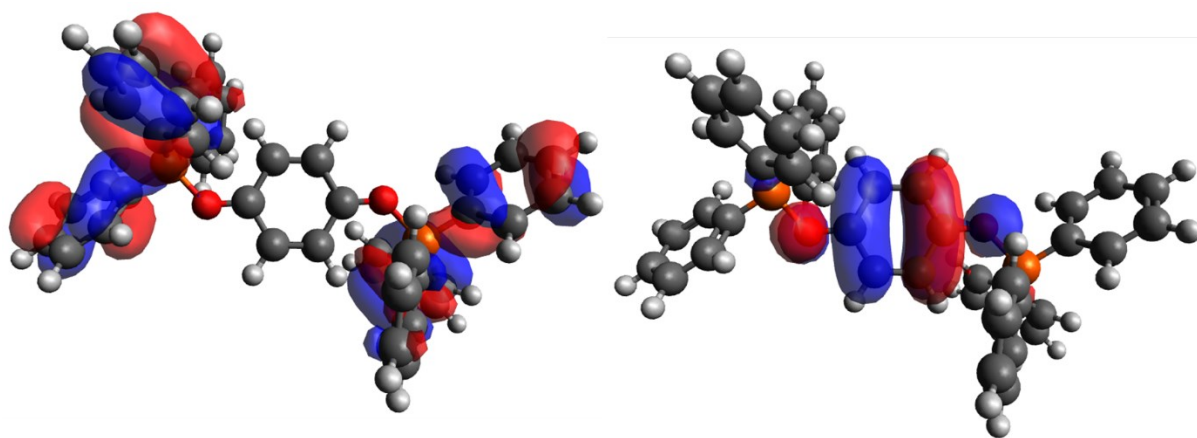

**Figure S58.** HOMO (left) and LUMO (right) images of  $\text{BPh}_3\text{-Q-BPh}_3$ . Isovalue = 0.02  $e^-/\text{a.u.}$

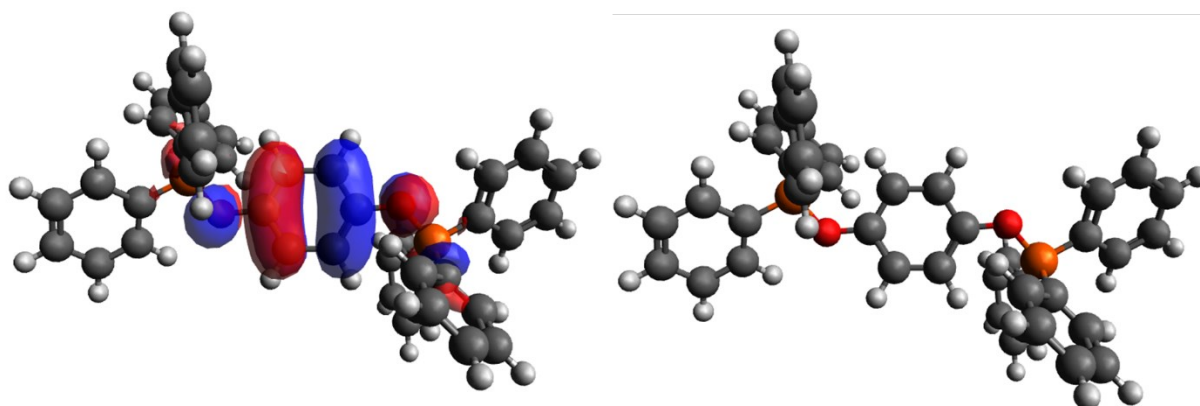

**Figure S59.** HOMO (left) and LUMO (right) images of  $[\text{BPh}_3\text{-Q-BPh}_3]^{2-}$ . Isovalue = 0.02  $e^-/\text{a.u.}$



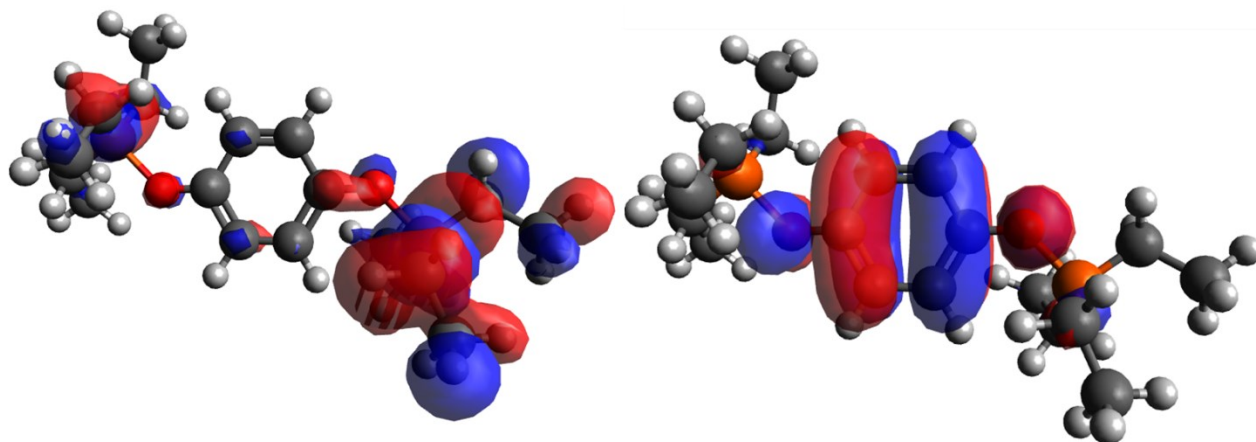

**Figure S60.** HOMO (left) and LUMO (right) images of  $\text{BEt}_3\text{-Q-BEt}_3$ . Isovalue =  $0.02 \text{ e}^-/\text{a.u.}$

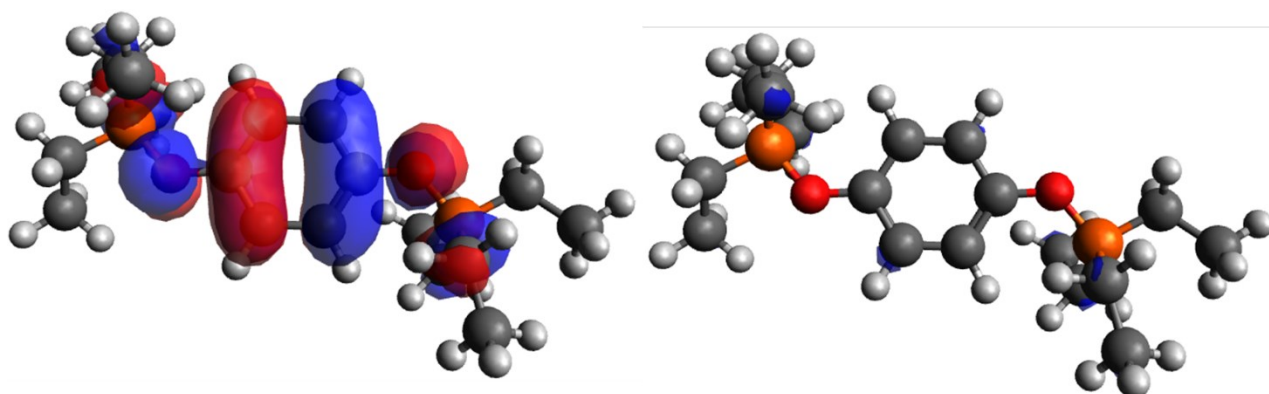

**Figure S61.** HOMO (left) and LUMO (right) images of  $[\text{BEt}_3\text{-Q-BEt}_3]^{2-}$ . Isovalue =  $0.02 \text{ e}^-/\text{a.u.}$

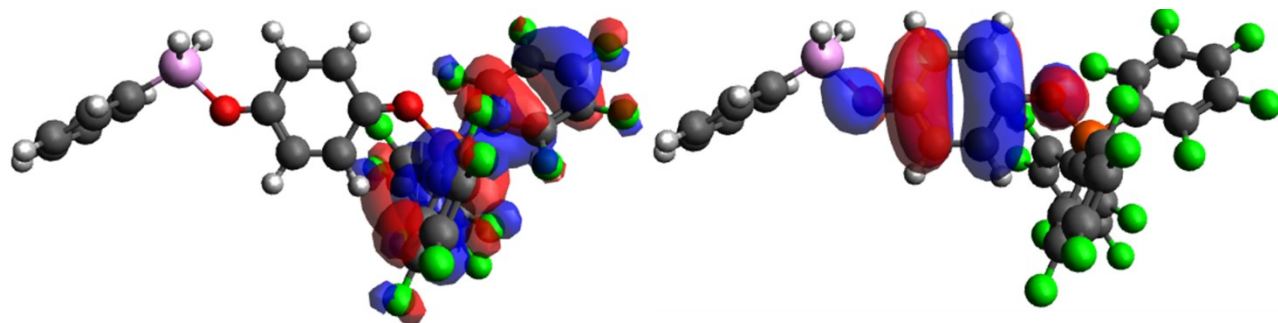

**Figure S62.** HOMO (left) and LUMO (right) images of  $[\text{B}(\text{C}_6\text{F}_5)_3\text{-Q-SiH}_2\text{Ph}]^+$ . Isovalue =  $0.02 \text{ e}^-/\text{a.u.}$

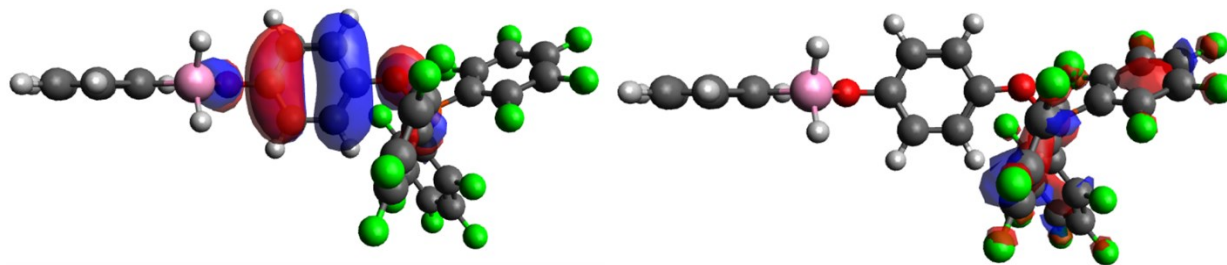

**Figure S63.** HOMO (left) and LUMO (right) images of  $[\text{B}(\text{C}_6\text{F}_5)_3\text{-Q-SiH}_2\text{Ph}]^-$ . Isovalue =  $0.02 \text{ e}^-/\text{a.u.}$

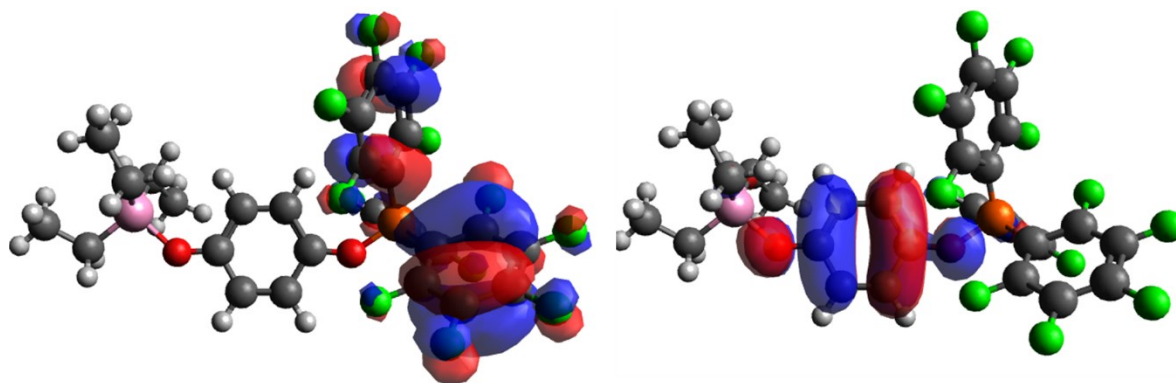

**Figure S64.** HOMO (left) and LUMO (right) images of  $[\text{B}(\text{C}_6\text{F}_5)_3\text{-Q-SiEt}_3]^+$ . Isovalue =  $0.02 \text{ e}^-/\text{a.u.}$

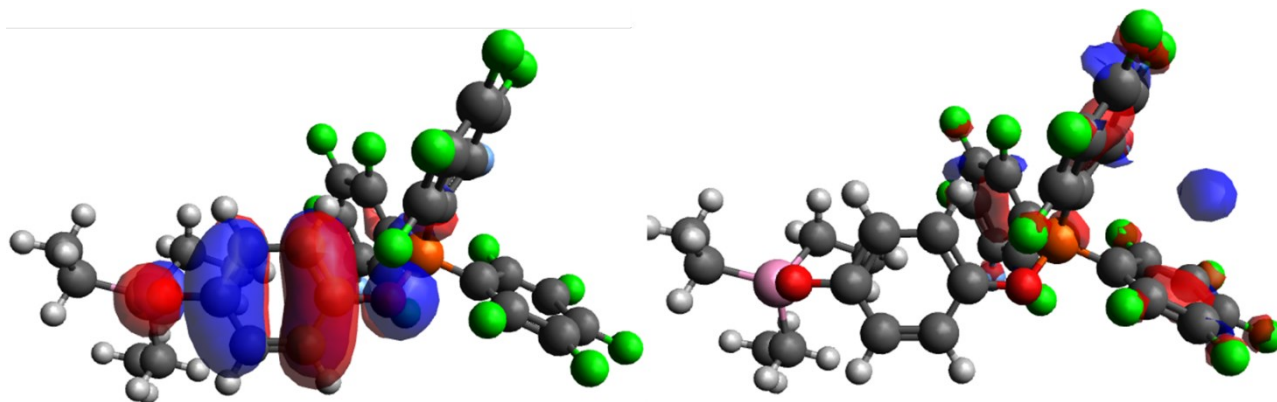

**Figure S65.** HOMO (left) and LUMO (right) images of  $[\text{B}(\text{C}_6\text{F}_5)_3\text{-Q-SiEt}_3]^-$ . Isovalue =  $0.02 \text{ e}^-/\text{a.u.}$

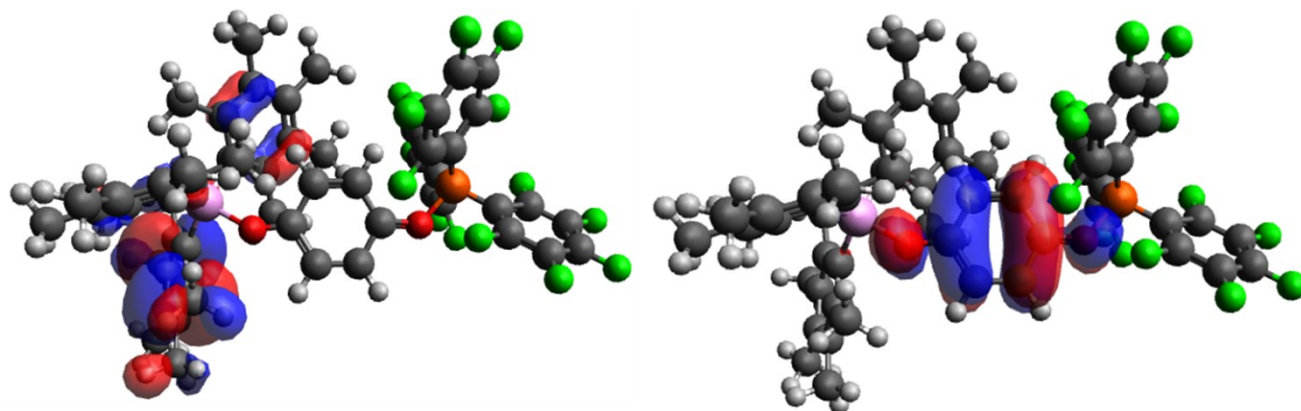

**Figure S66.** HOMO (left) and LUMO (right) images of  $[\text{B}(\text{C}_6\text{F}_5)_3\text{-Q-Si}(\text{C}_6\text{Me}_5)_3]^+$ . Isovalue =  $0.02 \text{ e}^-/\text{a.u.}$

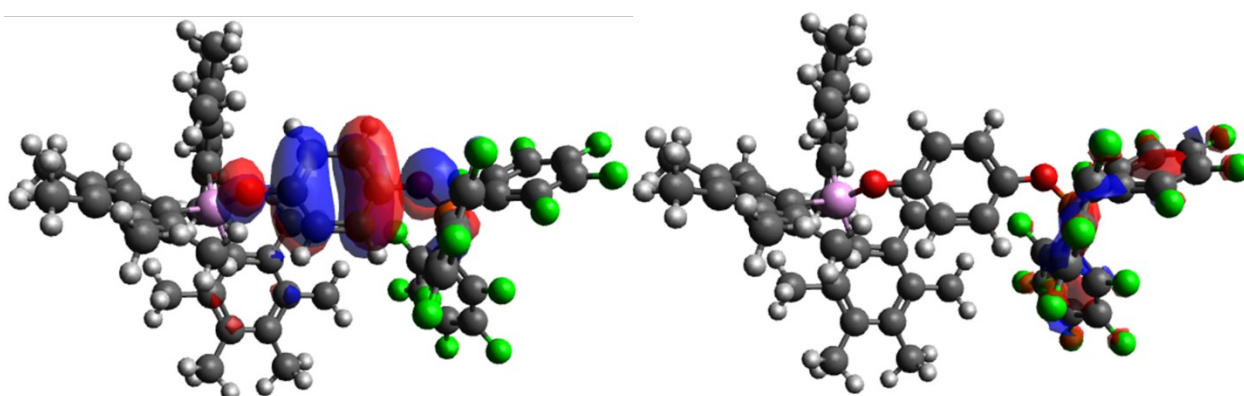

**Figure S67.** HOMO (left) and LUMO (right) images of  $[\text{B}(\text{C}_6\text{F}_5)_3\text{-Q-Si}(\text{C}_6\text{Me}_5)_3]^-$ . Isovalue =  $0.02 \text{ e}^-/\text{a.u.}$

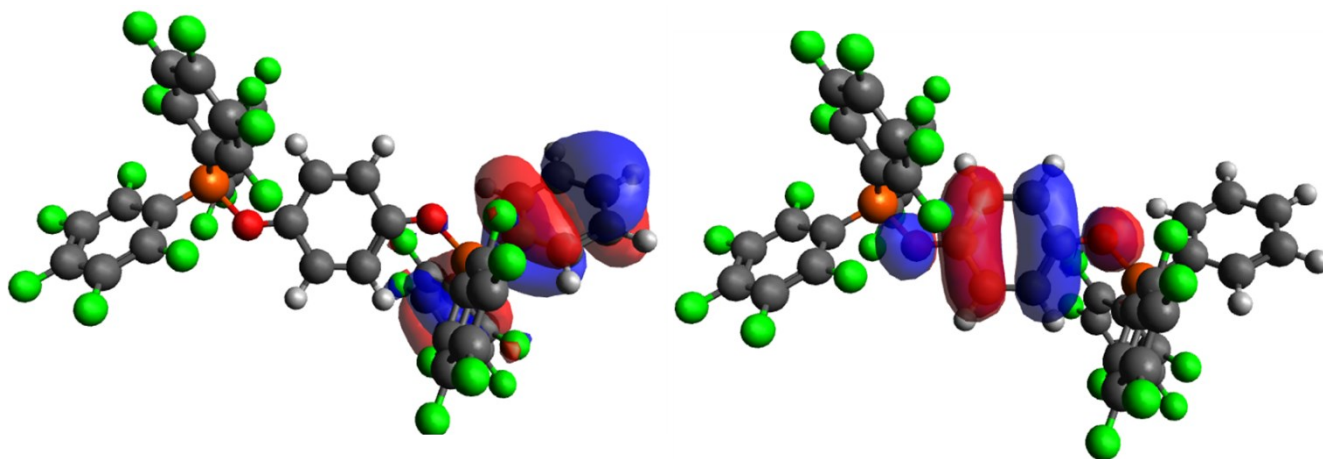

**Figure S68.** HOMO (left) and LUMO (right) images of  $\text{B}(\text{C}_6\text{F}_5)_3\text{-Q-B}(\text{C}_6\text{F}_5)_2\text{Ph}$ . Isovalue =  $0.02 \text{ e}^-/\text{a.u.}$

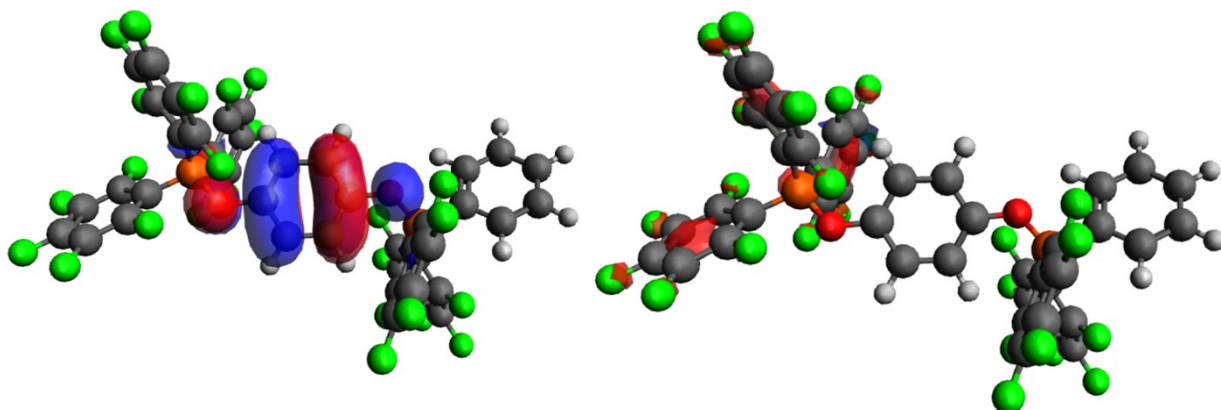

**Figure S69.** HOMO (left) and LUMO (right) images of  $[\text{B}(\text{C}_6\text{F}_5)_3\text{-Q-B}(\text{C}_6\text{F}_5)_2\text{Ph}]^{2-}$ . Isovalue =  $0.02 \text{ e}^-/\text{a.u.}$

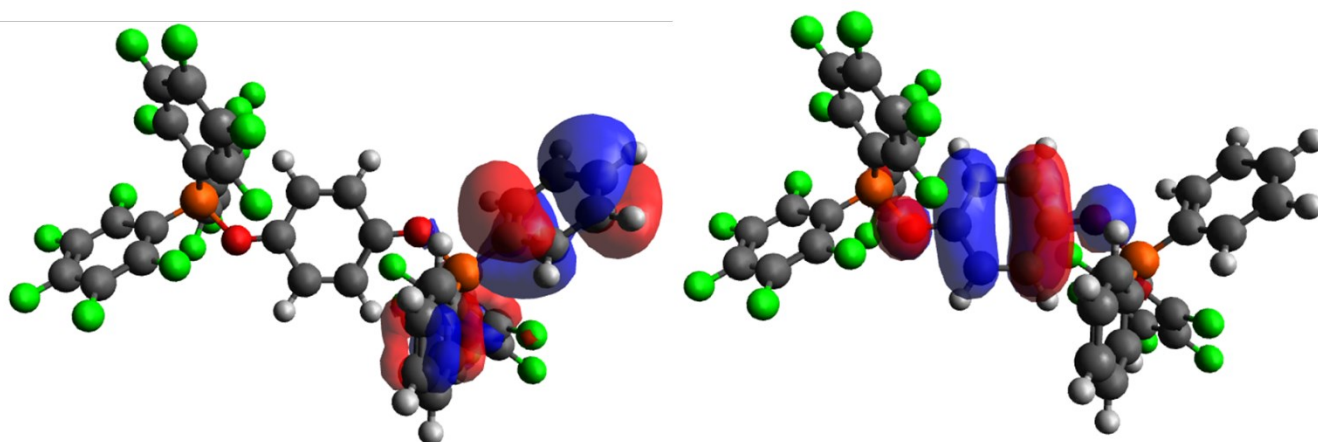

**Figure S70.** HOMO (left) and LUMO (right) images of  $\text{B}(\text{C}_6\text{F}_5)_3\text{-Q-B}(\text{C}_6\text{F}_5)\text{Ph}_2$ . Isovalue =  $0.02 \text{ e}^-/\text{a.u.}$

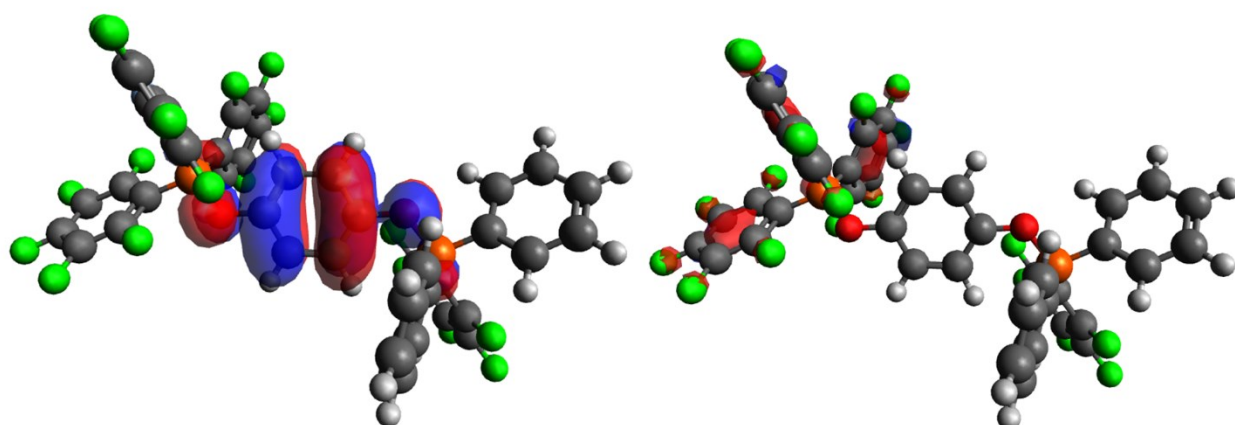

**Figure S71.** HOMO (left) and LUMO (right) images of  $[\text{B}(\text{C}_6\text{F}_5)_3\text{-Q-B}(\text{C}_6\text{F}_5)\text{Ph}_2]^{2-}$ . Isovalue =  $0.02 \text{ e}^-/\text{a.u.}$

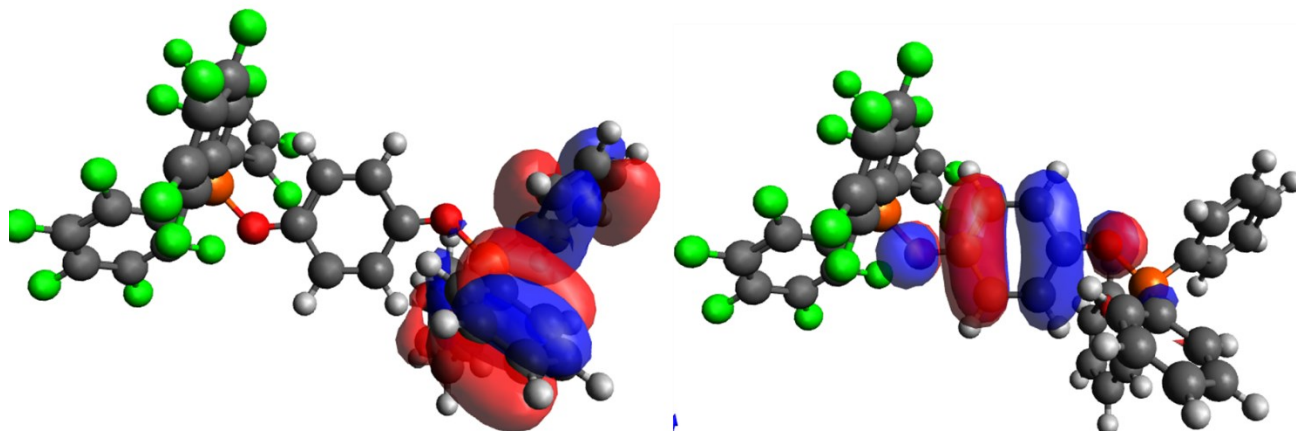

**Figure S72.** HOMO (left) and LUMO (right) images of B(C<sub>6</sub>F<sub>5</sub>)<sub>3</sub>-Q-BPh<sub>3</sub>. Isovalue = 0.02 e<sup>-</sup>/a.u.

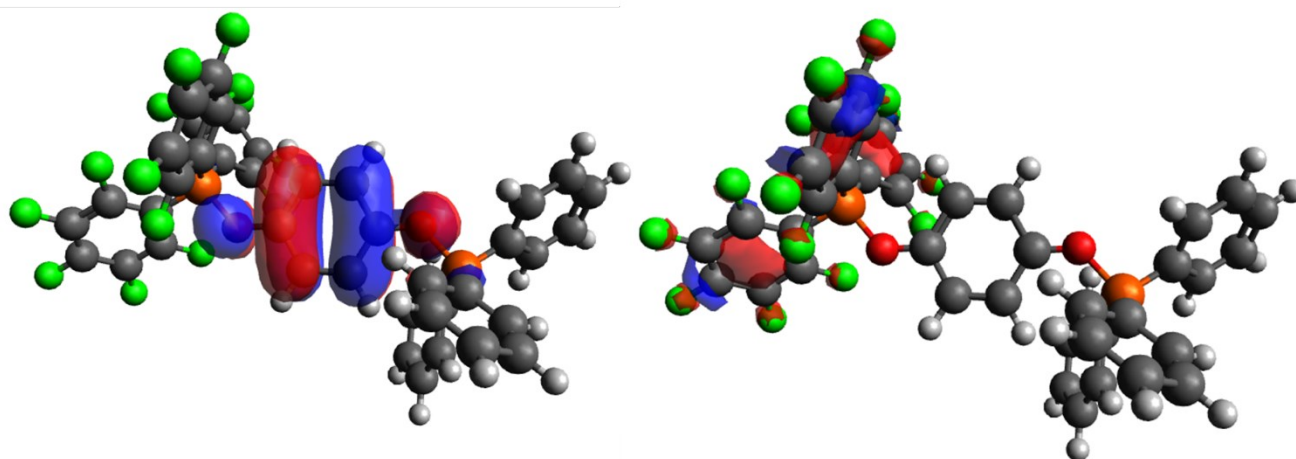

**Figure S73.** HOMO (left) and LUMO (right) images of [B(C<sub>6</sub>F<sub>5</sub>)<sub>3</sub>-Q-BPh<sub>3</sub>]<sup>2-</sup>. Isovalue = 0.02 e<sup>-</sup>/a.u.

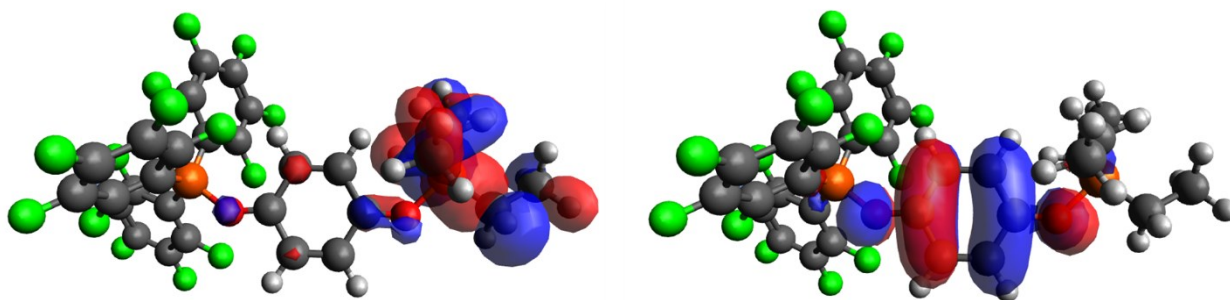

**Figure S74.** HOMO (left) and LUMO (right) images of B(C<sub>6</sub>F<sub>5</sub>)<sub>3</sub>-Q-BEt<sub>3</sub>. Isovalue = 0.02 e<sup>-</sup>/a.u.

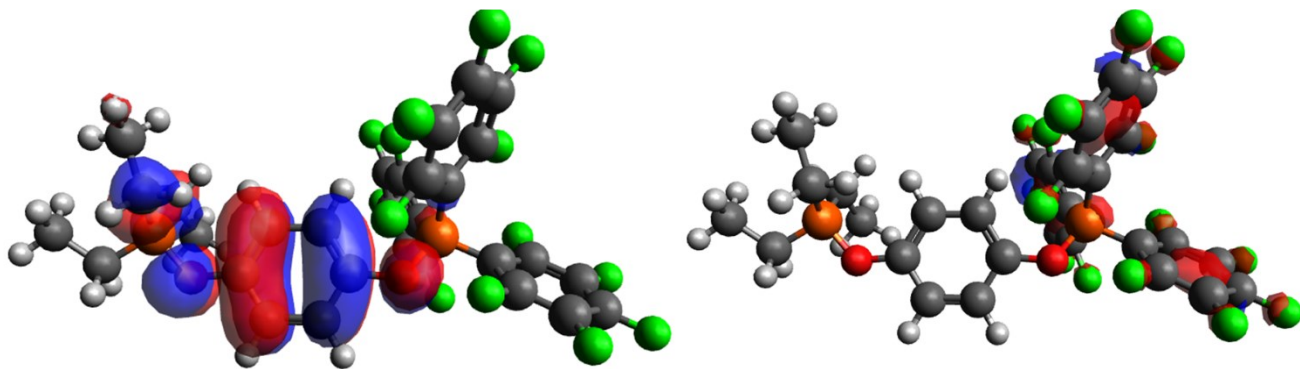

**Figure S75.** HOMO (left) and LUMO (right) images of  $[\text{B}(\text{C}_6\text{F}_5)_3\text{-Q-BEt}_3]^{2+}$ . Isovalue =  $0.02 \text{ e}^-/\text{a.u.}$

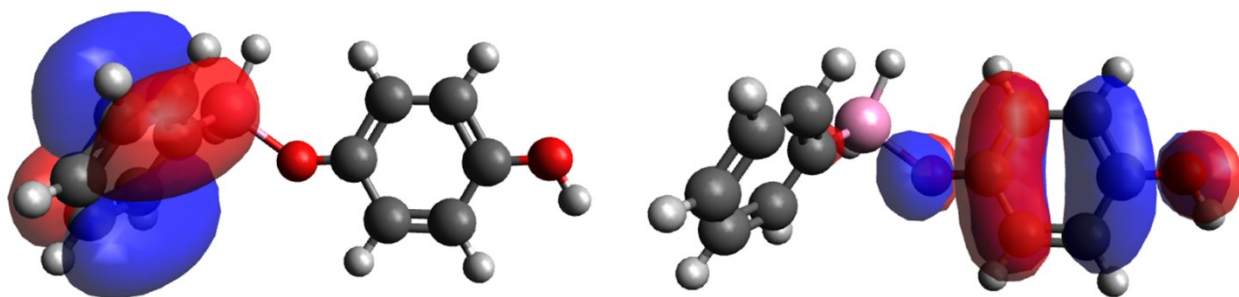

**Figure S76.** HOMO (left) and LUMO (right) images of  $[\text{SiH}_2\text{Ph-HQ}]^{2+}$ . Isovalue =  $0.02 \text{ e}^-/\text{a.u.}$

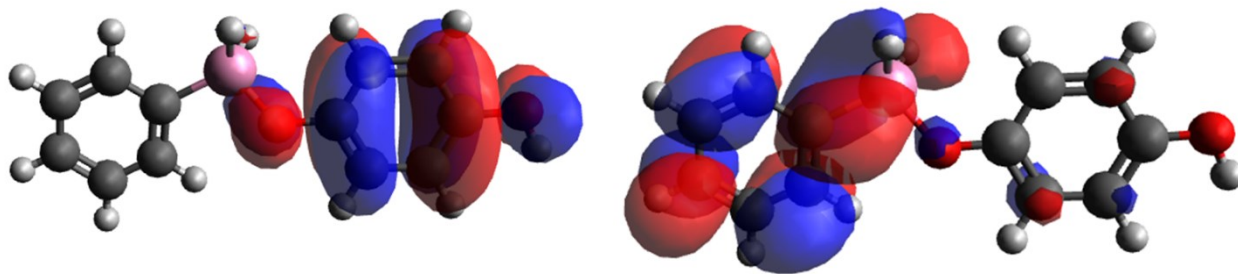

**Figure S77.** HOMO (left) and LUMO (right) images of  $\text{SiH}_2\text{Ph-HQ}$ . Isovalue =  $0.02 \text{ e}^-/\text{a.u.}$

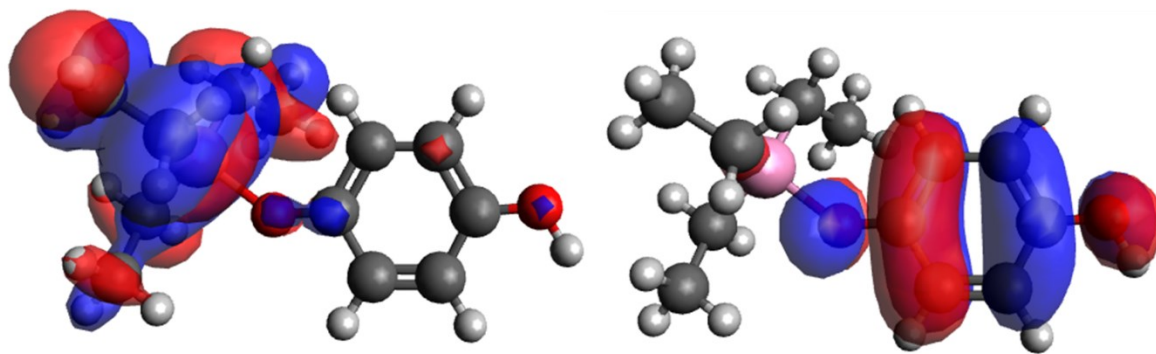

**Figure S78.** HOMO (left) and LUMO (right) images of [SiEt<sub>3</sub>-HQ]<sup>2+</sup>. Isovalue = 0.02 e<sup>-</sup>/a.u.

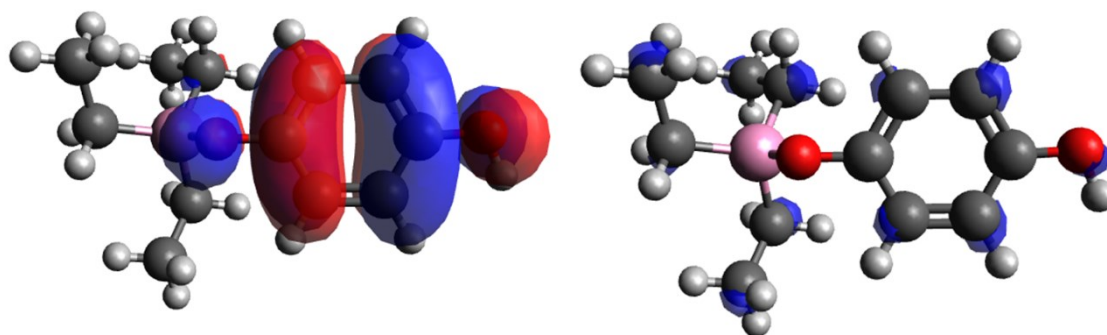

**Figure S79.** HOMO (left) and LUMO (right) images of SiEt<sub>3</sub>-HQ. Isovalue = 0.02 e<sup>-</sup>/a.u.

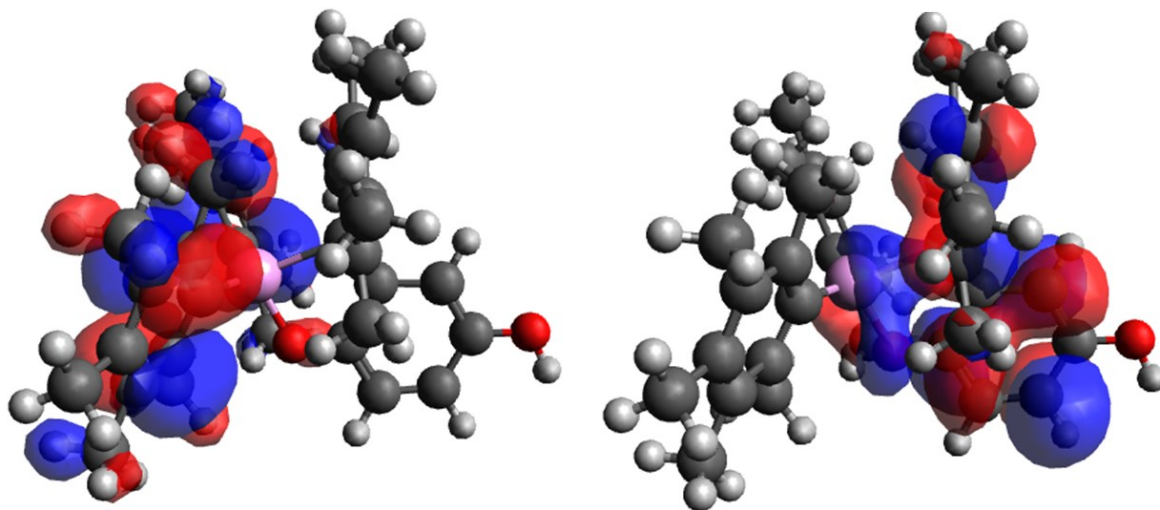

**Figure S80.** HOMO (left) and LUMO (right) images of [Si(C<sub>6</sub>Me<sub>5</sub>)<sub>3</sub>-HQ]<sup>2+</sup>. Isovalue = 0.02 e<sup>-</sup>/a.u.

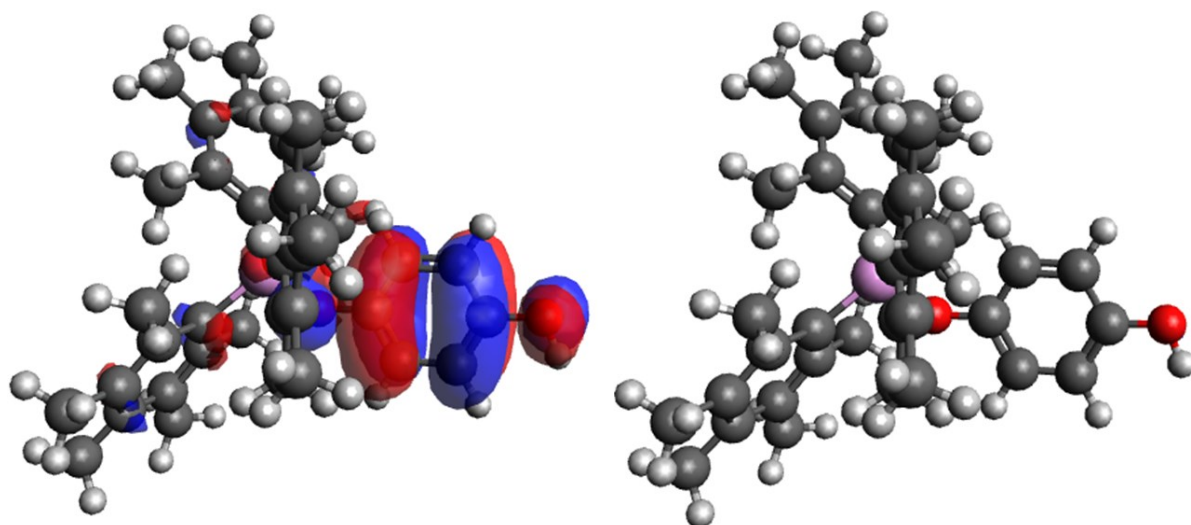

**Figure S81.** HOMO (left) and LUMO (right) images of  $\text{Si}(\text{C}_6\text{Me}_5)_3\text{-HQ}$ . Isovalue = 0.02  $e^-/\text{a.u.}$

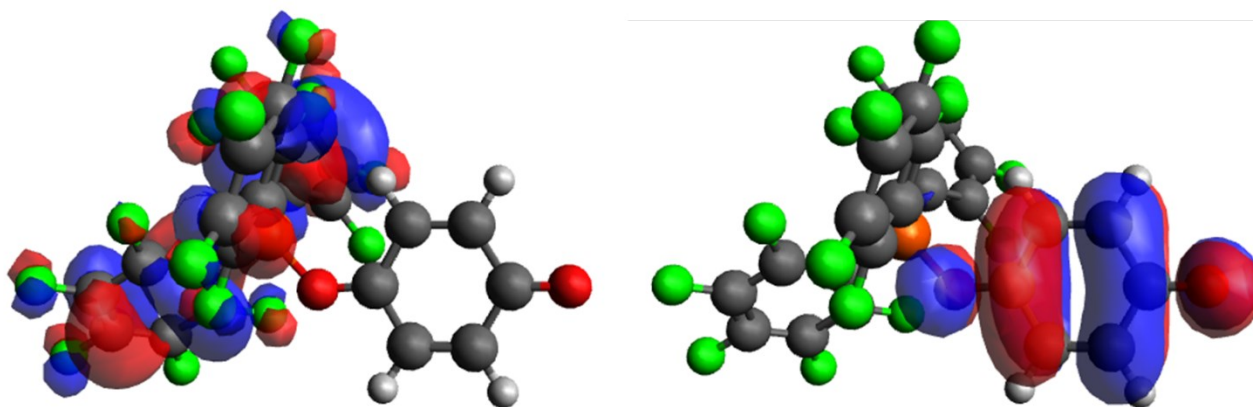

**Figure S82.** HOMO (left) and LUMO (right) images of  $[\text{B}(\text{C}_6\text{F}_5)_3\text{-HQ}]^+$ . Isovalue = 0.02  $e^-/\text{a.u.}$



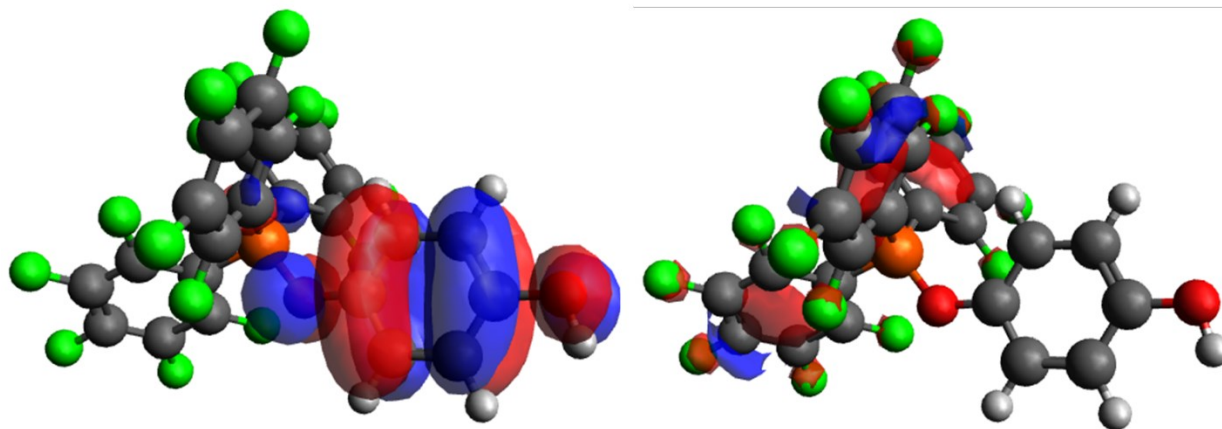

**Figure S83.** HOMO (left) and LUMO (right) images of  $[\text{B}(\text{C}_6\text{F}_5)_3\text{-HQ}]^-$ . Isovalue =  $0.02 e^-/\text{a.u.}$

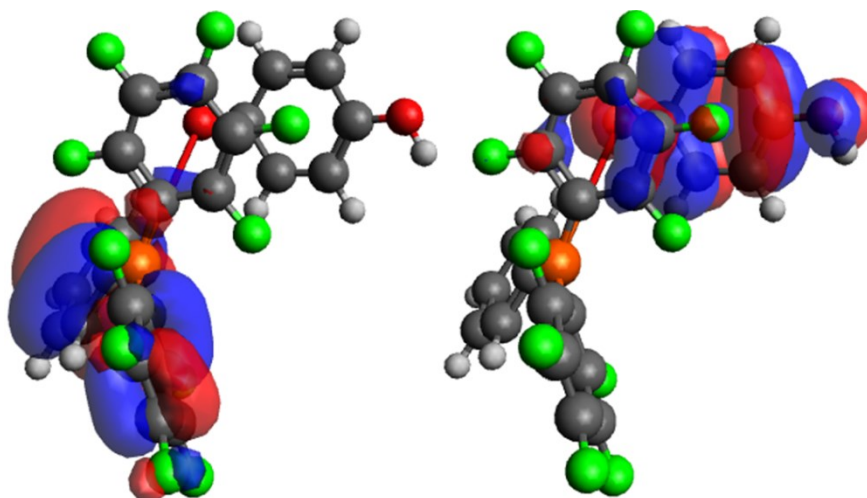

**Figure S84.** HOMO (left) and LUMO (right) images of  $[\text{B}(\text{C}_6\text{F}_5)_2\text{Ph-HQ}]^+$ . Isovalue =  $0.02 e^-/\text{a.u.}$

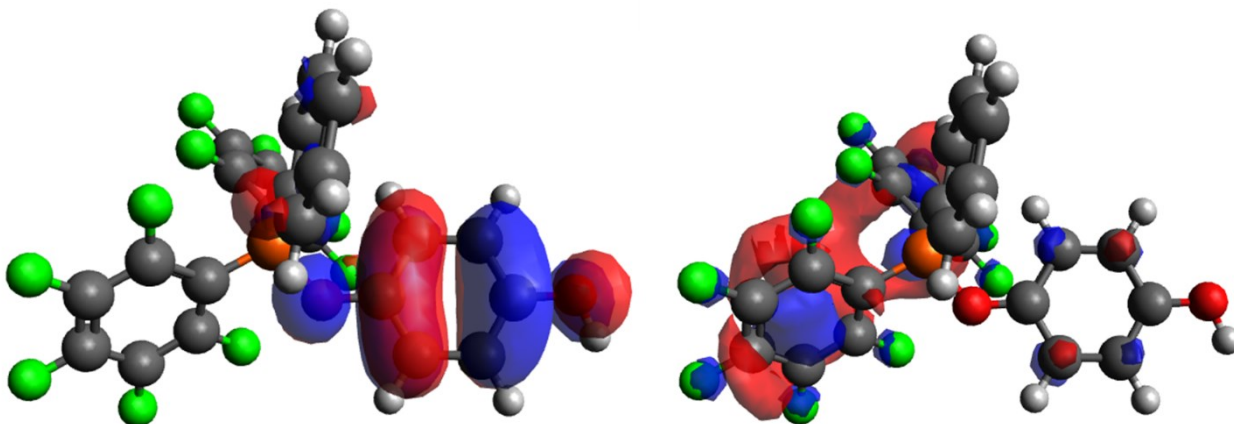

**Figure S85.** HOMO (left) and LUMO (right) images of  $[\text{B}(\text{C}_6\text{F}_5)_2\text{Ph-HQ}]^-$ . Isovalue =  $0.02 e^-/\text{a.u.}$

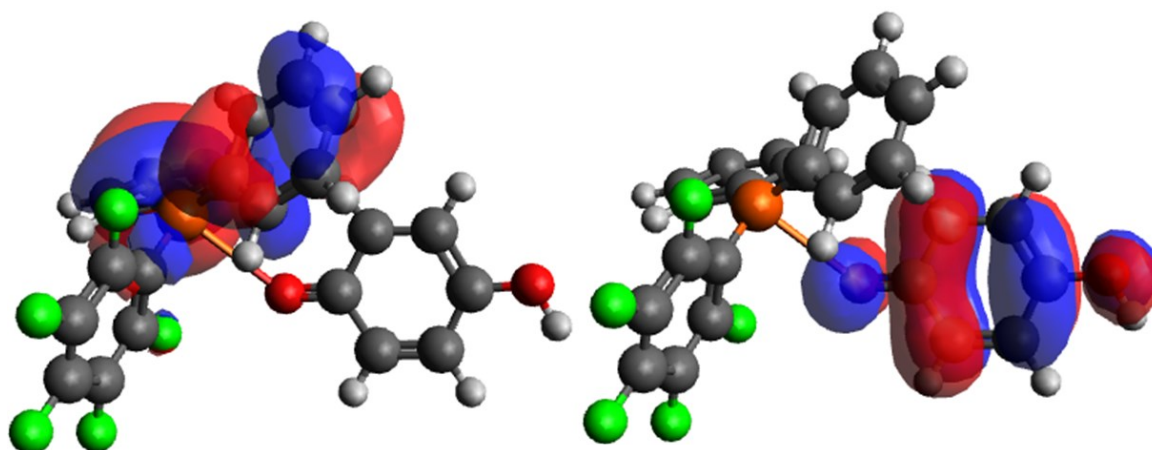

**Figure S86.** HOMO (left) and LUMO (right) images of  $[\text{B}(\text{C}_6\text{F}_5)\text{Ph}_2\text{-HQ}]^+$ . Isovalue =  $0.02 \text{ e}^-/\text{a.u.}$

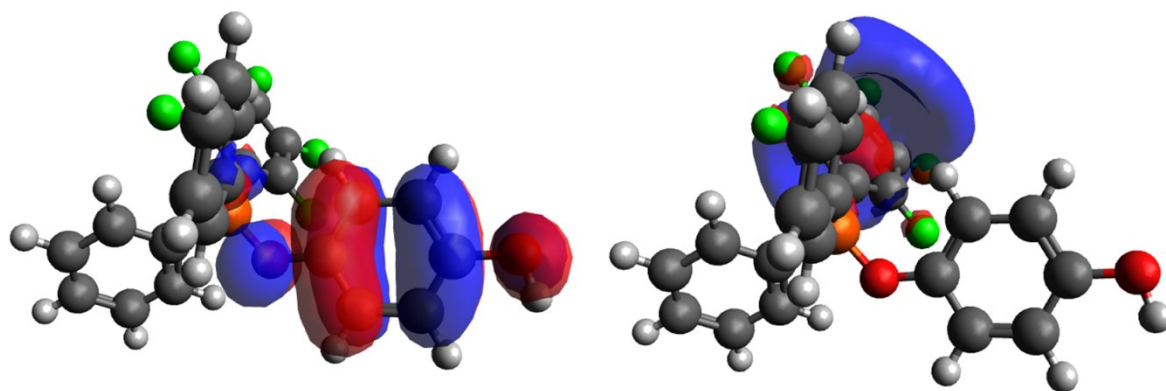

**Figure S87.** HOMO (left) and LUMO (right) images of  $[\text{B}(\text{C}_6\text{F}_5)\text{Ph}_2\text{-HQ}]^-$ . Isovalue =  $0.02 \text{ e}^-/\text{a.u.}$

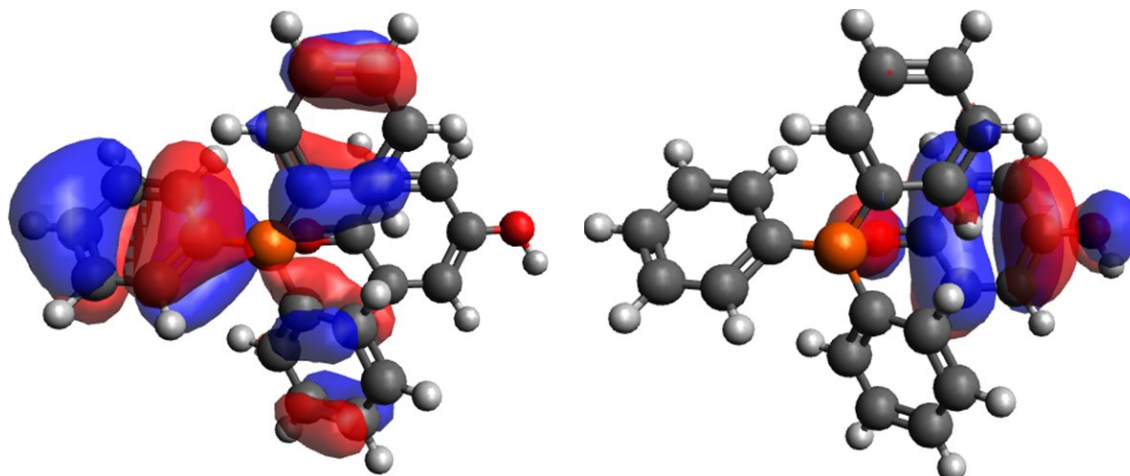

**Figure S88.** HOMO (left) and LUMO (right) images of [BPh<sub>3</sub>-HQ]<sup>+</sup>. Isovalue = 0.02 e<sup>-</sup>/a.u.

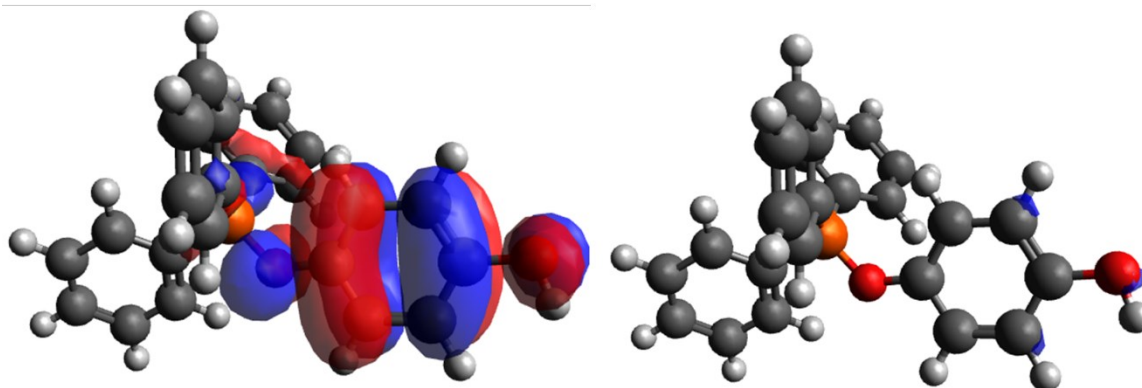

**Figure S89.** HOMO (left) and LUMO (right) images of [BPh<sub>3</sub>-HQ]<sup>-</sup>. Isovalue = 0.02 e<sup>-</sup>/a.u.

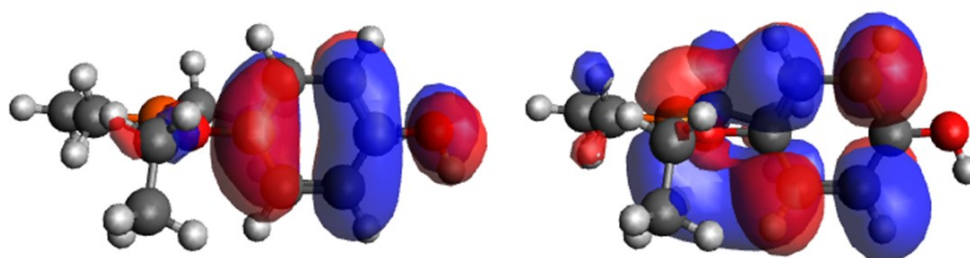

**Figure S90.** HOMO (left) and LUMO (right) images of [BEt<sub>3</sub>-HQ]<sup>+</sup>. Isovalue = 0.02 e<sup>-</sup>/a.u.

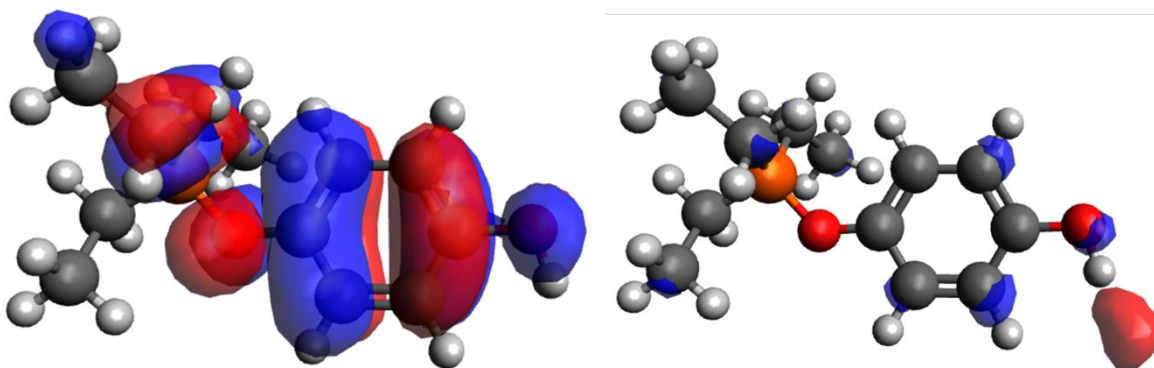

**Figure S91.** HOMO (left) and LUMO (right) images of  $[\text{BEt}_3\text{-HQ}]^-$ . Isovalue = 0.02  $e^-/\text{a.u.}$

### 18) Plots Showing the Locations of the Unpaired Spin Density

**Figure S92.** Unpaired spin density plot of semiquinone ( $[\text{Q}]^{\cdot-}$ ) where the numbers show

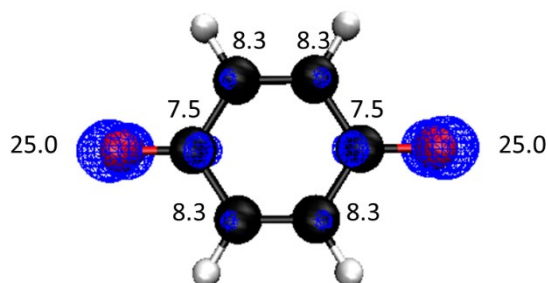

the percentage of electron density residing on each atom. Isovalue = 0.01  $e^-/\text{a.u.}$

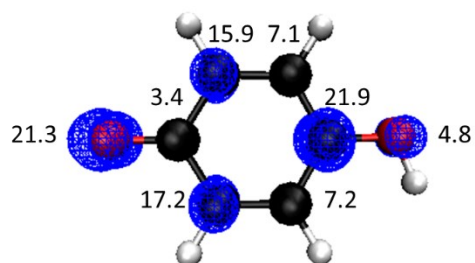

**Figure S93.** Unpaired spin density plot of  $[\text{HQ}]^{\cdot}$  where the numbers show the percentage of electron density residing on each atom. Isovalue = 0.01  $e^-/\text{a.u.}$

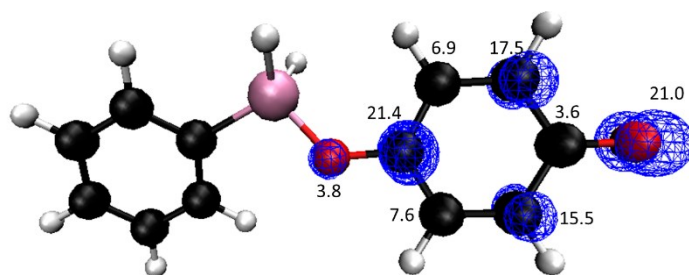

**Figure S94.** Unpaired spin density plot of  $[\text{SiH}_2\text{Ph-Q}]^\bullet$  where the numbers show the percentage of electron density residing on each atom. Isovalue =  $0.01 \text{ e}^-/\text{a.u.}$

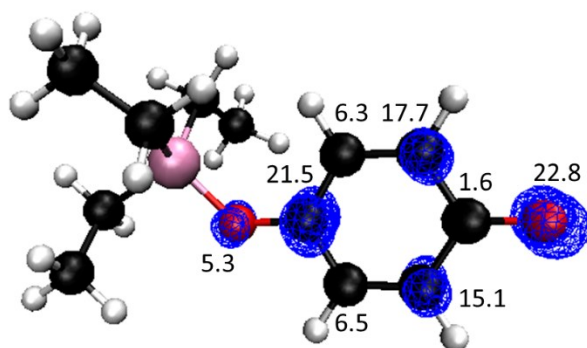

**Figure S95.** Unpaired spin density plot of  $[\text{SiEt}_3\text{-Q}]^\bullet$  where the numbers show the percentage of electron density residing on each atom. Isovalue =  $0.01 \text{ e}^-/\text{a.u.}$

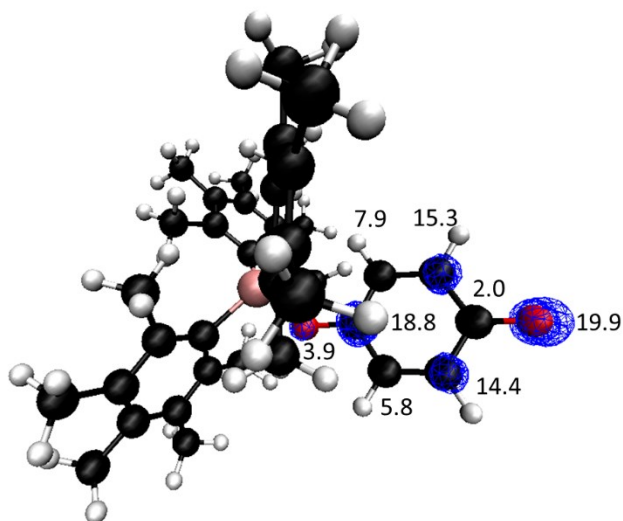

**Figure S96.** Unpaired spin density plot of [Si(C<sub>6</sub>Me<sub>5</sub>)<sub>3</sub>-Q]• where the numbers show the percentage of electron density residing on each atom. Isovalue = 0.01 e<sup>-</sup>/a.u.

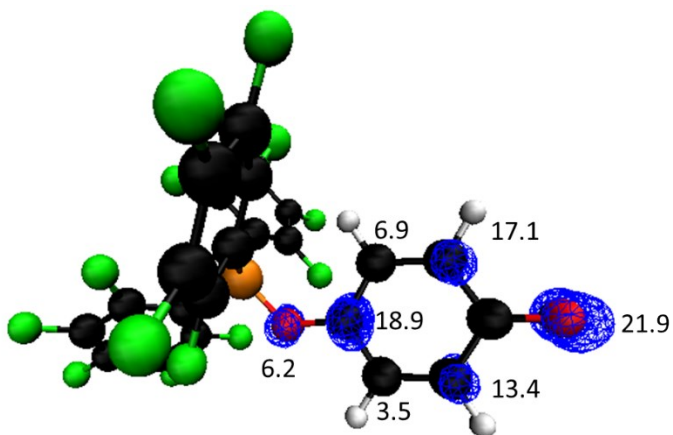

**Figure S97.** Unpaired spin density plot of [B(C<sub>6</sub>F<sub>5</sub>)<sub>3</sub>-Q]• where the numbers show the percentage of electron density residing on each atom. Isovalue = 0.01 e<sup>-</sup>/a.u.

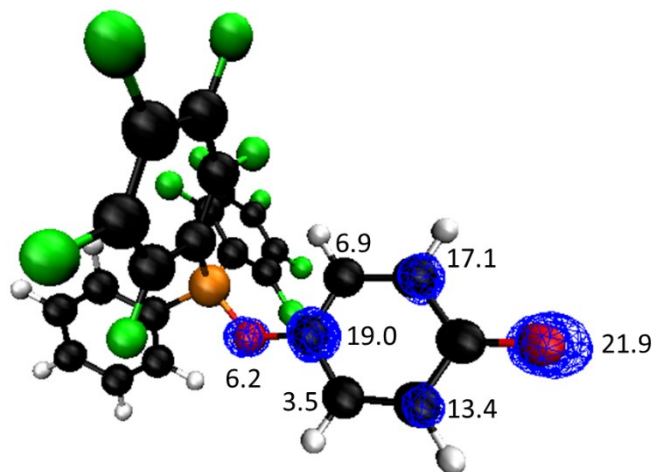

**Figure S98.** Unpaired spin density plot of  $[\text{B}(\text{C}_6\text{F}_5)_2\text{Ph-Q}]^{\bullet-}$  where the numbers show the percentage of electron density residing on each atom. Isovalue =  $0.01 \text{ e}^-/\text{a.u.}$

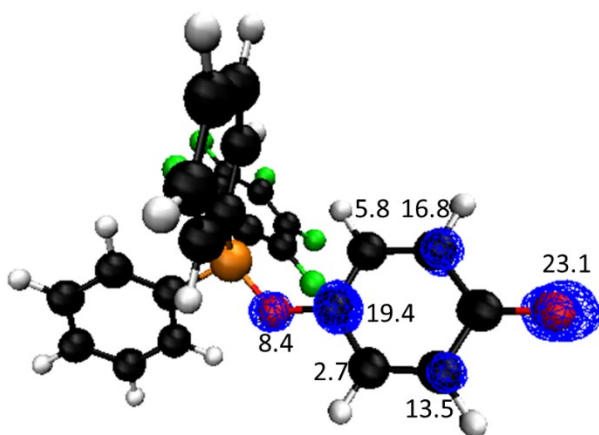

**Figure S99.** Unpaired spin density plot of  $[\text{B}(\text{C}_6\text{F}_5)\text{Ph}_2\text{-Q}]^{\bullet-}$  where the numbers show the percentage of electron density residing on each atom. Isovalue =  $0.01 \text{ e}^-/\text{a.u.}$

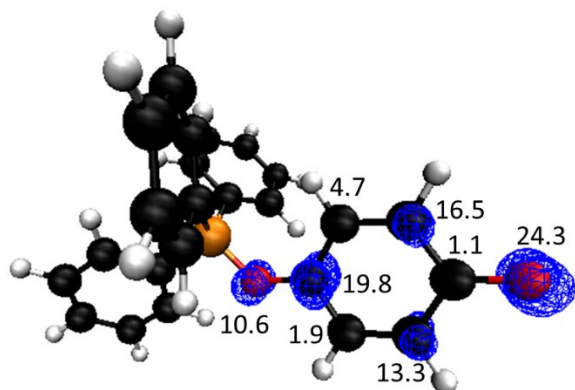

**Figure S100.** Unpaired spin density plot of  $[\text{BPh}_3\text{-Q}]^{\bullet-}$  where the numbers show the percentage of electron density residing on each atom. Isovalue =  $0.01 \text{ e}^-/\text{a.u.}$

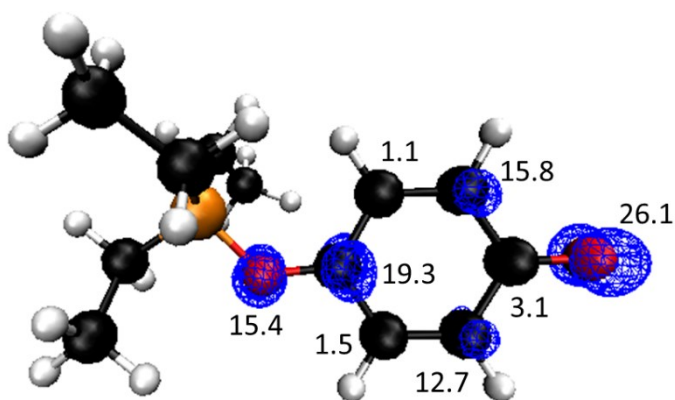

**Figure S101.** Unpaired spin density plot of  $[\text{BEt}_3\text{-Q}]^{\bullet-}$  where the numbers show the percentage of electron density residing on each atom. Isovalue =  $0.01 \text{ e}^-/\text{a.u.}$



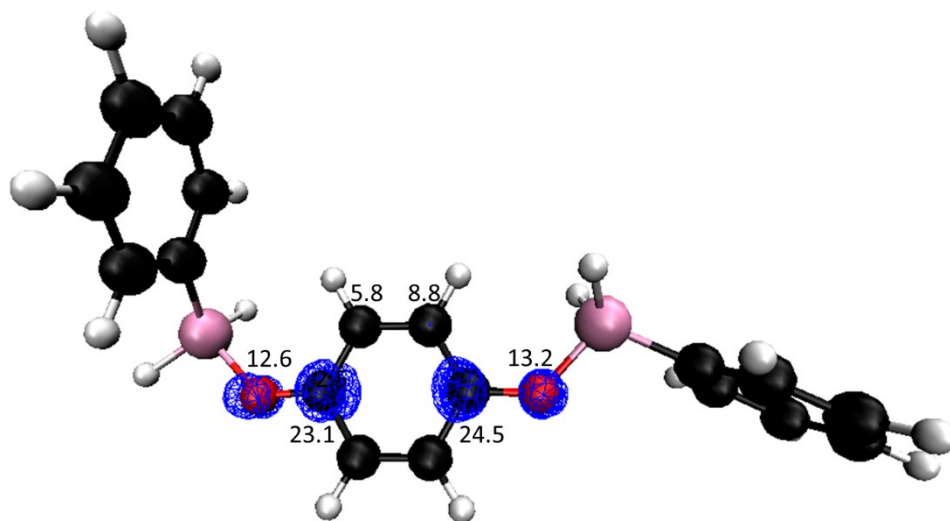

**Figure S102.** Unpaired spin density plot of  $[\text{SiH}_2\text{Ph-Q-SiH}_2\text{Ph}]^{++}$  where the numbers show the percentage of electron density residing on each atom. Isovalue =  $0.01 \text{ e}^-/\text{a.u.}$

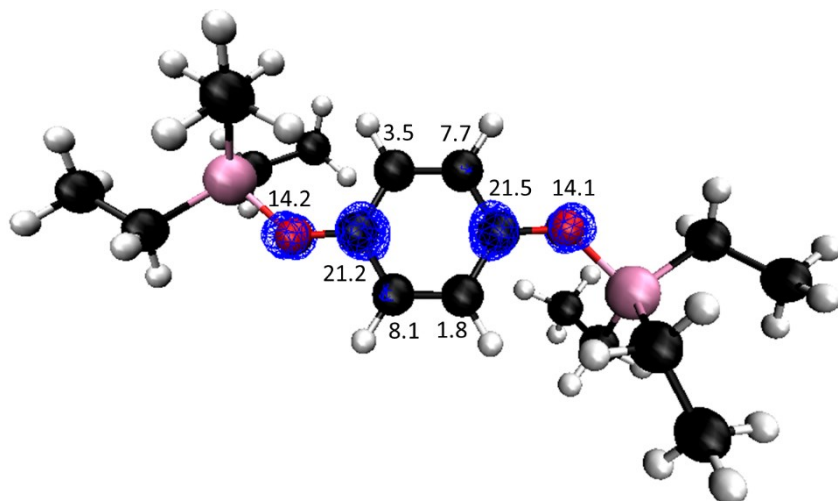

**Figure S103.** Unpaired spin density plot of  $[\text{SiEt}_3\text{-Q-SiEt}_3]^{++}$  where the numbers show the percentage of electron density residing on each atom. Isovalue =  $0.01 \text{ e}^-/\text{a.u.}$

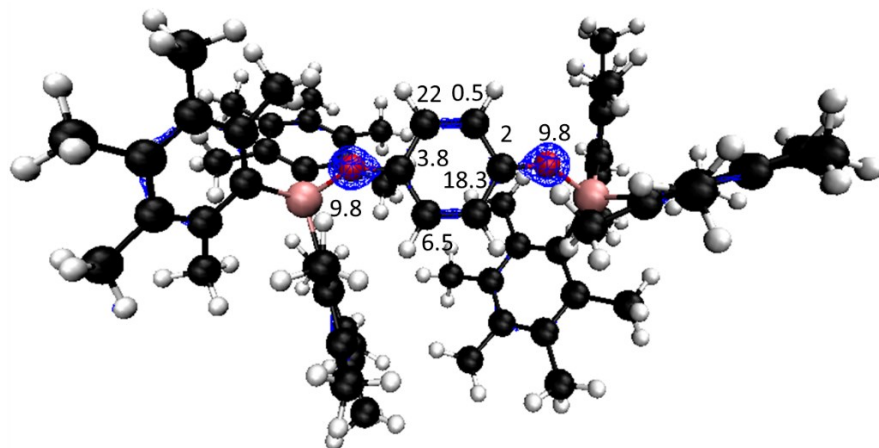

**Figure S104.** Unpaired spin density plot of  $[\text{Si}(\text{C}_6\text{Me}_5)_3\text{-Q-Si}(\text{C}_6\text{Me}_5)_3]^{2+}$  where the numbers show the percentage of electron density residing on each atom. Isovalue = 0.5  $e^-/\text{a.u.}$

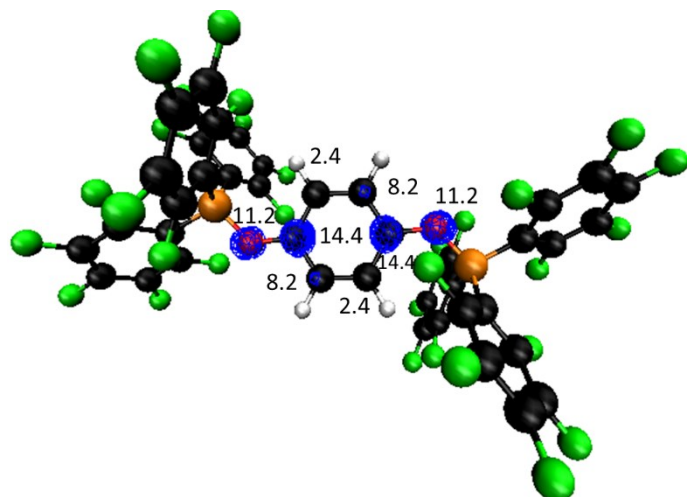

**Figure S105.** Unpaired spin density plot of  $[\text{B}(\text{C}_6\text{F}_5)_3\text{-Q-B}(\text{C}_6\text{F}_5)_3]^-$  where the numbers show the percentage of electron density residing on each atom. Isovalue = 0.01  $e^-/\text{a.u.}$

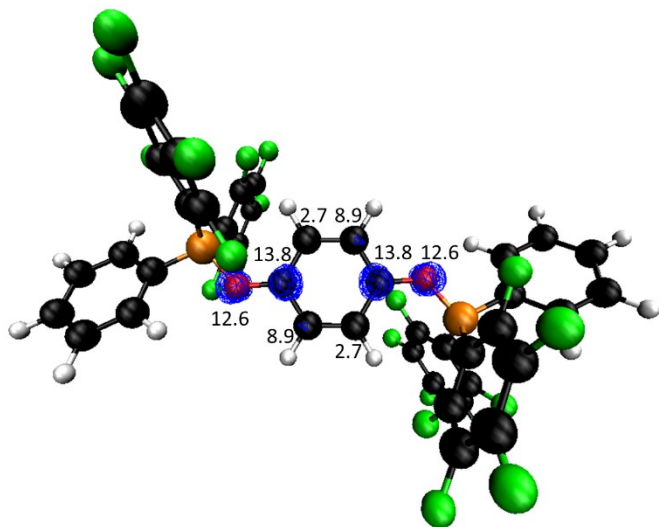

**Figure S106.** Unpaired spin density plot of  $[\text{B}(\text{C}_6\text{F}_5)_2\text{Ph-Q-B}(\text{C}_6\text{F}_5)_2\text{Ph}]^{\bullet-}$  where the numbers show the percentage of electron density residing on each atom. Isovalue =  $0.01 \text{ e}^-/\text{a.u.}$

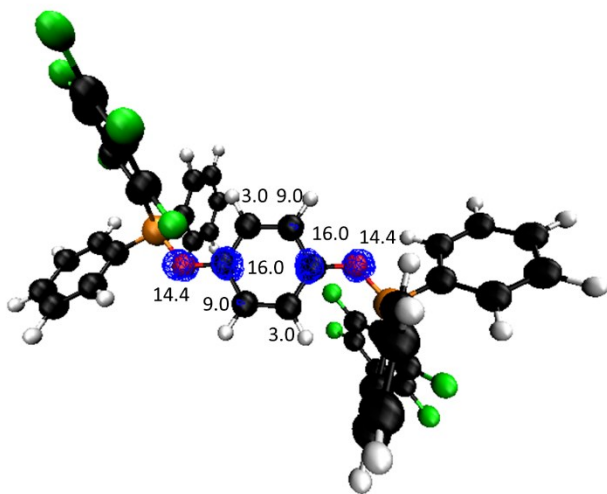

**Figure S107.** Unpaired spin density plot of  $[\text{B}(\text{C}_6\text{F}_5)\text{Ph}_2\text{-Q-B}(\text{C}_6\text{F}_5)\text{Ph}_2]^{\bullet-}$  where the numbers show the percentage of electron density residing on each atom. Isovalue =  $0.01 \text{ e}^-/\text{a.u.}$

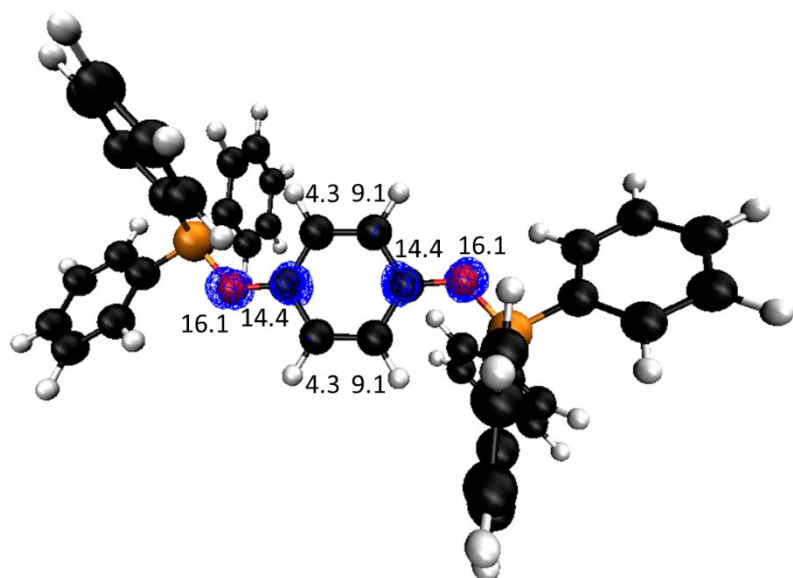

**Figure S108.** Unpaired spin density plot of [BPh<sub>3</sub>-Q-BPh<sub>3</sub>]<sup>-</sup> where the numbers show the percentage of electron density residing on each atom. Isovalue = 0.01 e<sup>-</sup>/a.u.

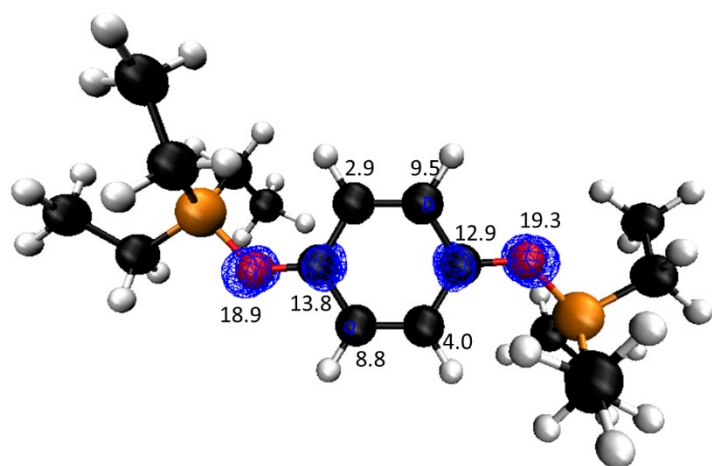

**Figure S109.** Unpaired spin density plot of [BEt<sub>3</sub>-Q-BEt<sub>3</sub>]<sup>-</sup> where the numbers show the percentage of electron density residing on each atom. Isovalue = 0.01 e<sup>-</sup>/a.u.

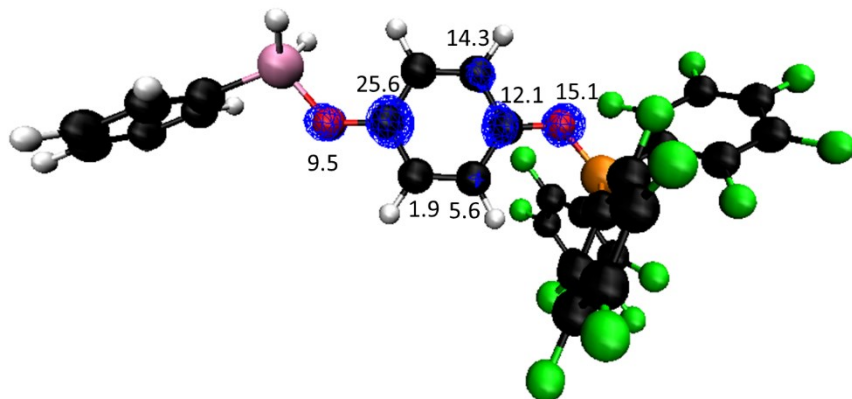

**Figure S110.** Unpaired spin density plot of  $[\text{B}(\text{C}_6\text{F}_5)_3\text{-Q-SiH}_2\text{Ph}]^+$  where the numbers show the percentage of electron density residing on each atom. Isovalue =  $0.01 \text{ e}^-/\text{a.u.}$

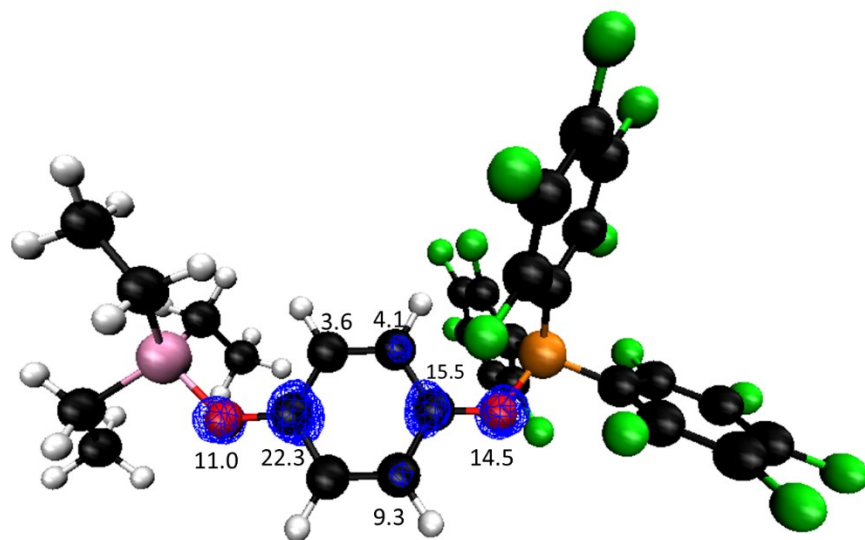

**Figure S111.** Unpaired spin density plot of  $[\text{B}(\text{C}_6\text{F}_5)_3\text{-Q-SiEt}_3]^+$  where the numbers show the percentage of electron density residing on each atom. Isovalue =  $0.01 \text{ e}^-/\text{a.u.}$

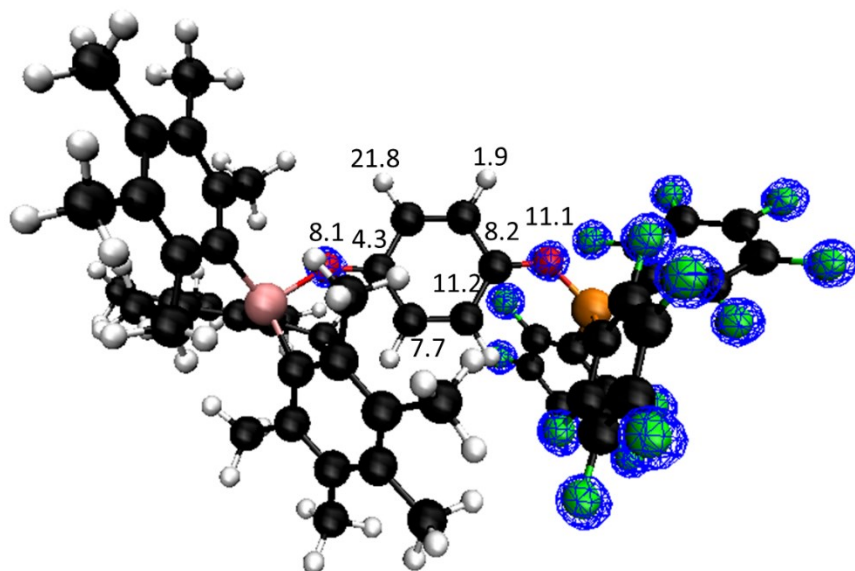

**Figure S112.** Unpaired spin density plot of  $[\text{B}(\text{C}_6\text{F}_5)_3\text{-Q-Si}(\text{C}_6\text{Me}_5)_3]^-$  where the numbers show the percentage of electron density residing on each atom. Isovalue =  $0.5 \text{ e}^-/\text{a.u.}$

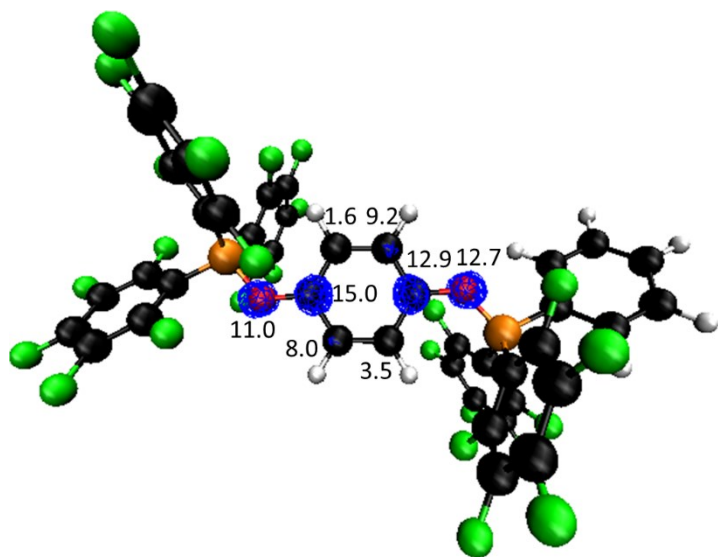

**Figure S113.** Unpaired spin density plot of  $[\text{B}(\text{C}_6\text{F}_5)_3\text{-Q-B}(\text{C}_6\text{F}_5)_2\text{Ph}]^-$  where the numbers show the percentage of electron density residing on each atom. Isovalue =  $0.01 \text{ e}^-/\text{a.u.}$

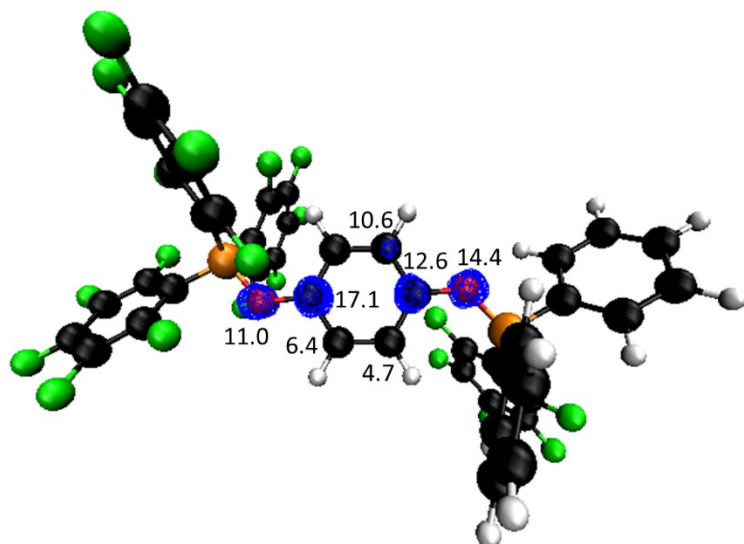

**Figure S114.** Unpaired spin density plot of  $[\text{B}(\text{C}_6\text{F}_5)_3\text{-Q-B}(\text{C}_6\text{F}_5)\text{Ph}_2]^-$  where the numbers show the percentage of electron density residing on each atom. Isovalue =  $0.01 \text{ e}^-/\text{a.u.}$

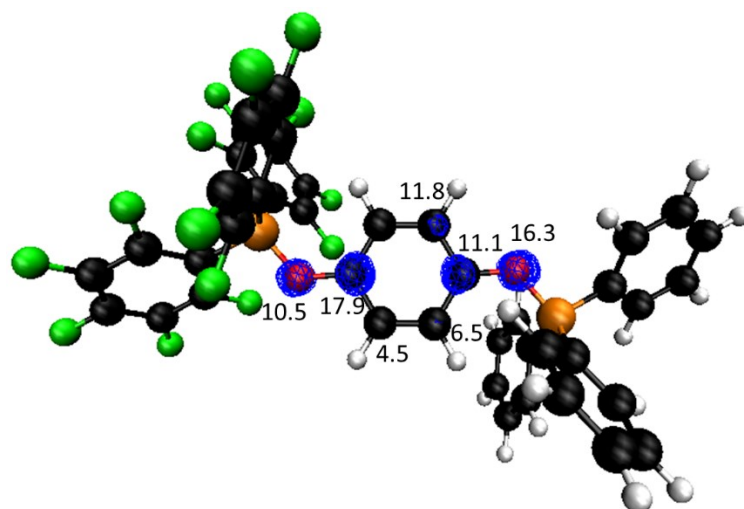

**Figure S115.** Unpaired spin density plot of  $[\text{B}(\text{C}_6\text{F}_5)_3\text{-Q-BPh}_3]^-$  where the numbers show the percentage of electron density residing on each atom. Isovalue =  $0.01 \text{ e}^-/\text{a.u.}$

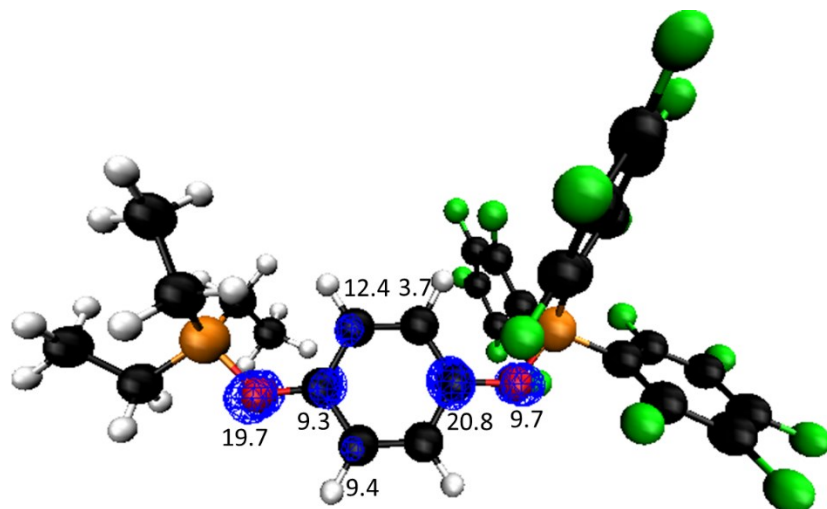

**Figure S116.** Unpaired spin density plot of  $[\text{B}(\text{C}_6\text{F}_5)_3\text{-Q-BEt}_3]^+$  where the numbers show the percentage of electron density residing on each atom. Isovalue =  $0.01 \text{ e}^-/\text{a.u.}$

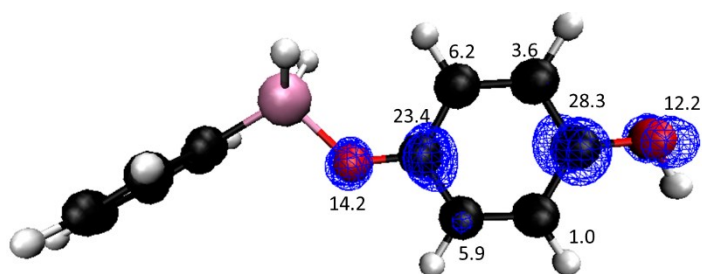

**Figure S117.** Unpaired spin density plot of  $[\text{SiH}_2\text{Ph-HQ}]^+$  where the numbers show the percentage of electron density residing on each atom. Isovalue =  $0.01 \text{ e}^-/\text{a.u.}$

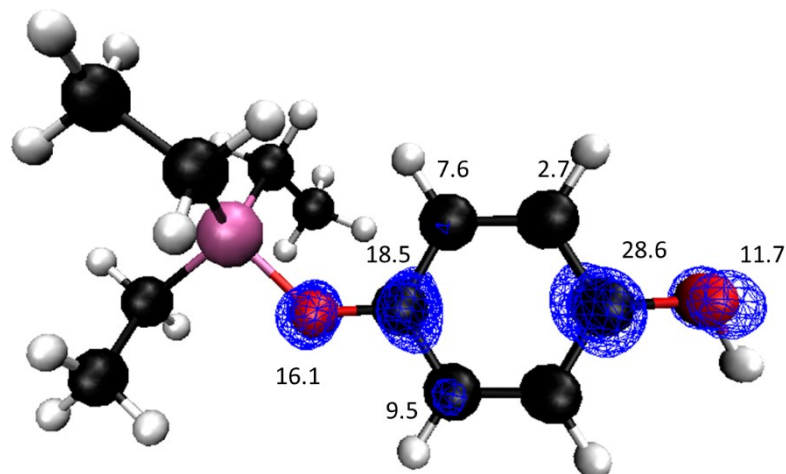

**Figure S118.** Unpaired spin density plot of  $[\text{SiEt}_3\text{-HQ}]^+$  where the numbers show the percentage of electron density residing on each atom. Isovalue =  $0.01 \text{ e}^-/\text{a.u.}$



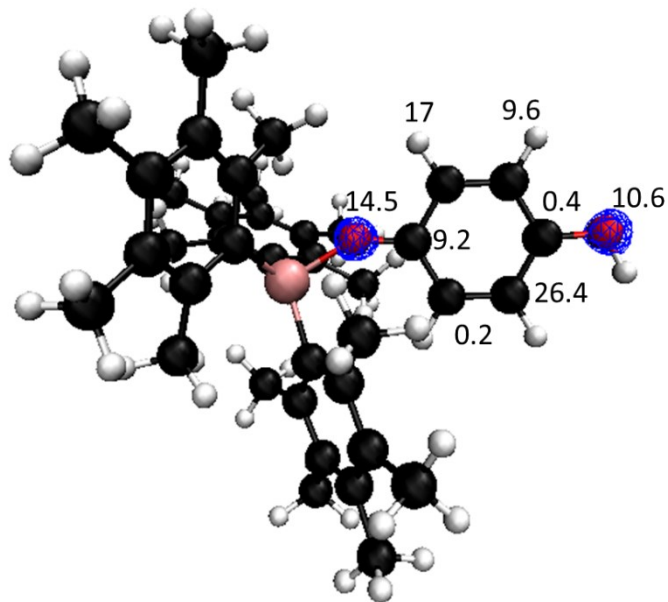

**Figure S119.** Unpaired spin density plot of  $[\text{Si}(\text{C}_6\text{Me}_5)_3\text{-HQ}]^{2+}$  where the numbers show the percentage of electron density residing on each atom. Isovalue =  $0.5 \text{ e}^-/\text{a.u.}$

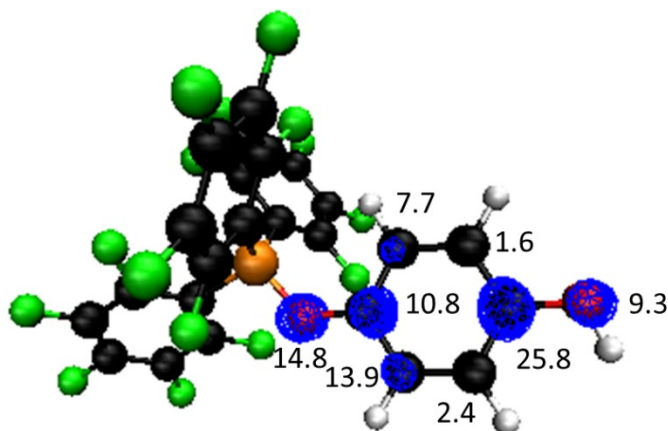

**Figure S120.** Unpaired spin density plot of  $[\text{B}(\text{C}_6\text{F}_5)_3\text{-HQ}]^\bullet$  where the numbers show the percentage of electron density residing on each atom. Isovalue =  $0.01 \text{ e}^-/\text{a.u.}$

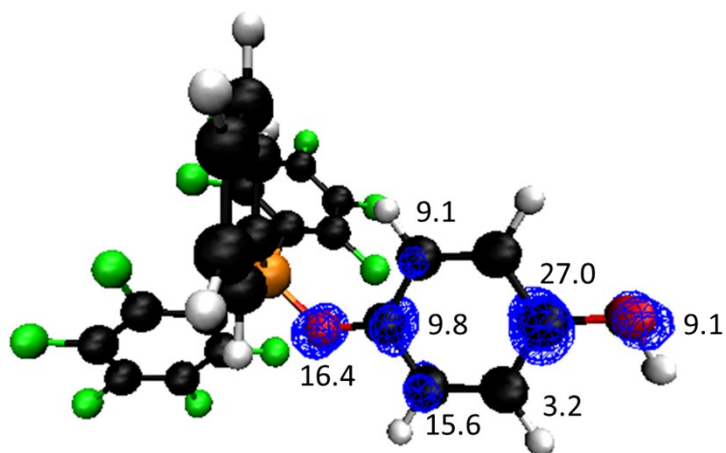

**Figure S121.** Unpaired spin density plot of **[B(C<sub>6</sub>F<sub>5</sub>)<sub>2</sub>Ph-HQ]•** where the numbers show the percentage of electron density residing on each atom. Isovalue = 0.01 e<sup>-</sup>/a.u.

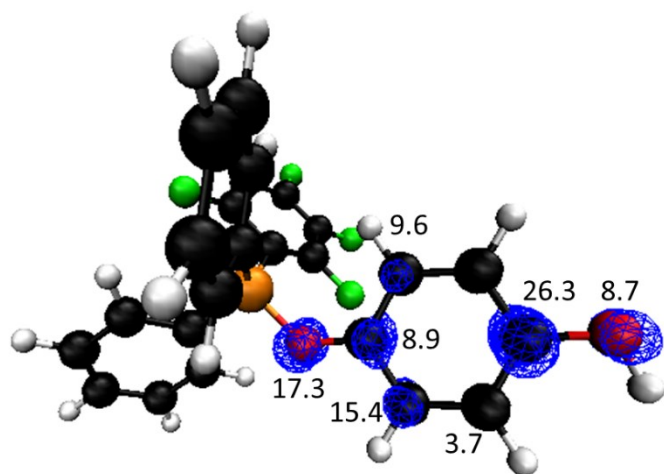

**Figure S122.** Unpaired spin density plot of **[B(C<sub>6</sub>F<sub>5</sub>)Ph<sub>2</sub>-HQ]•** where the numbers show the percentage of electron density residing on each atom. Isovalue = 0.01 e<sup>-</sup>/a.u.

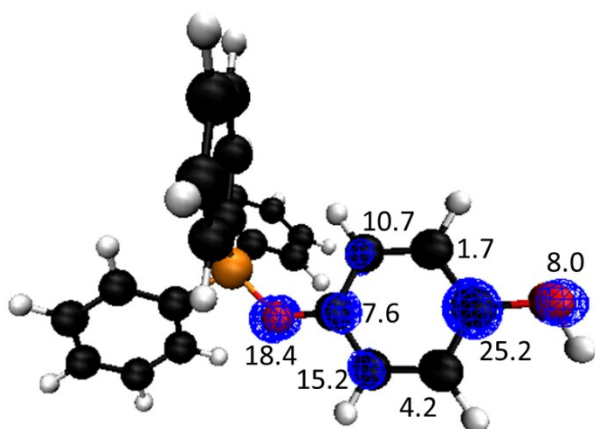

**Figure S123.** Unpaired spin density plot of **[BPh<sub>3</sub>-HQ]•** where the numbers show the percentage of electron density residing on each atom. Isovalue = 0.01 e<sup>-</sup>/a.u.

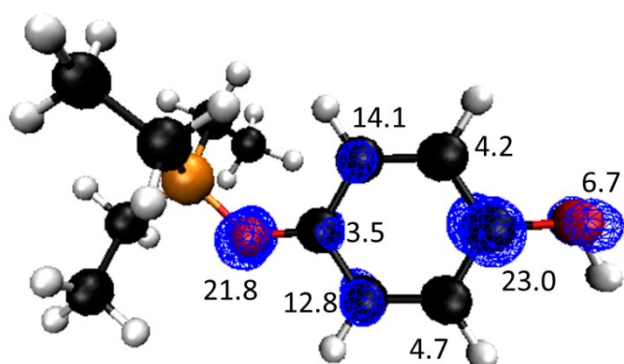

**Figure S124.** Unpaired spin density plot of  $[\text{BEt}_3\text{-HQ}]^+$  where the numbers show the percentage of electron density residing on each atom. Isovalue =  $0.01 \text{ e}^-/\text{a.u.}$

### 19) 3D Coordinates of All Computed Structures

The 3D coordinates are organized so that they can be readily visualized in a Mercury. For each complex, the first number is the number of atoms, followed by the complex name, and the 3D coordinates.

|                      |           |           |           |                                  |          |          |          |
|----------------------|-----------|-----------|-----------|----------------------------------|----------|----------|----------|
| 14                   |           |           |           | C                                | -1.64668 | 1.20474  | 0.00301  |
| $[\text{SiPhH}_2]^+$ |           |           |           | H                                | 0.27691  | 2.15076  | -0.02299 |
| Si                   | -2.307320 | -0.000050 | -0.000060 | C                                | -1.64589 | -1.20541 | 0.00319  |
| H                    | -3.042560 | -1.266470 | -0.000790 | H                                | 0.27673  | -2.15116 | -0.02318 |
| H                    | -3.040870 | 1.267300  | 0.000970  | C                                | -2.34370 | -0.00020 | 0.01046  |
| C                    | -0.520980 | -0.000550 | 0.000010  | H                                | -2.18710 | 2.14608  | 0.00312  |
| C                    | 0.185450  | 1.223700  | 0.000070  | H                                | -2.18608 | -2.14689 | 0.00354  |
| C                    | 0.186290  | -1.224270 | 0.000110  | H                                | -3.42914 | -0.00056 | 0.01774  |
| C                    | 1.571090  | 1.217380  | -0.000070 | H                                | 2.83834  | 1.27295  | -0.56896 |
| H                    | -0.352740 | 2.167060  | -0.000280 |                                  |          |          |          |
| C                    | 1.571870  | -1.216910 | 0.000050  | 20                               |          |          |          |
| H                    | -0.351320 | -2.167970 | 0.000440  | $[\text{SiPhH}_2\text{-NCMe}]^+$ |          |          |          |
| C                    | 2.257170  | 0.000480  | -0.000050 | Si                               | 0.74879  | 1.51005  | 0.00009  |
| H                    | 2.120230  | 2.152240  | 0.000040  | N                                | 2.15955  | 0.27574  | 0.00001  |
| H                    | 2.121690  | -2.151370 | -0.000150 | C                                | -0.79350 | 0.52734  | 0.00003  |
| H                    | 3.342670  | 0.000830  | -0.000110 | C                                | -1.39326 | 0.15118  | -1.21336 |
|                      |           |           |           | C                                | -1.39321 | 0.15098  | 1.21339  |
| 15                   |           |           |           | C                                | -2.56508 | -0.59586 | -1.21052 |
| $\text{SiPhH}_3$     |           |           |           | C                                | -2.56504 | -0.59606 | 1.21046  |
| Si                   | 2.34012   | 0.00008   | 0.00586   | C                                | -3.14711 | -0.96858 | -0.00005 |
| H                    | 2.87243   | -0.12789  | 1.38488   | C                                | 3.00418  | -0.50445 | -0.00004 |
| H                    | 2.85060   | -1.14158  | -0.79117  | C                                | 4.07078  | -1.48773 | -0.00009 |
| C                    | 0.46581   | 0.00037   | -0.01159  | H                                | 1.06453  | 2.23120  | -1.23941 |
| C                    | -0.25436  | 1.20210   | -0.00962  | H                                | 1.06454  | 2.23104  | 1.23967  |
| C                    | -0.25426  | -1.20208  | -0.00962  | H                                | -0.95451 | 0.45018  | -2.16204 |

|   |          |          |          |
|---|----------|----------|----------|
| H | -0.95443 | 0.44982  | 2.16209  |
| H | -3.02923 | -0.87993 | -2.14847 |
| H | -3.02915 | -0.88029 | 2.14839  |
| H | -4.06529 | -1.54654 | -0.00008 |
| H | 5.03284  | -0.96968 | -0.00009 |
| H | 3.98214  | -2.10873 | -0.89471 |
| H | 3.98217  | -2.10881 | 0.89447  |

22

|                                   |           |           |           |
|-----------------------------------|-----------|-----------|-----------|
| [SiEt <sub>3</sub> ] <sup>+</sup> |           |           |           |
| Si                                | -0.140300 | -0.134490 | -0.251900 |
| C                                 | 1.307680  | -1.207480 | -0.636650 |
| H                                 | 0.982450  | -2.078000 | -1.212630 |
| H                                 | 2.022490  | -0.642400 | -1.244350 |
| C                                 | 0.133080  | 1.630970  | 0.202280  |
| H                                 | -0.632590 | 2.223200  | -0.316370 |
| H                                 | -0.127850 | 1.705580  | 1.269620  |
| C                                 | -1.830960 | -0.860220 | -0.158280 |
| H                                 | -2.033820 | -1.304550 | -1.142770 |
| H                                 | -1.748740 | -1.718080 | 0.525580  |
| C                                 | 1.971360  | -1.651690 | 0.692050  |
| H                                 | 1.294450  | -2.255290 | 1.302200  |
| H                                 | 2.848520  | -2.260840 | 0.463540  |
| H                                 | 2.305460  | -0.798610 | 1.289160  |
| C                                 | -2.948410 | 0.097700  | 0.272410  |
| H                                 | -3.898420 | -0.439280 | 0.320660  |
| H                                 | -2.754180 | 0.523420  | 1.260080  |
| H                                 | -3.065170 | 0.919530  | -0.438190 |
| C                                 | 1.544770  | 2.168690  | -0.065090 |
| H                                 | 1.617470  | 3.205110  | 0.271770  |
| H                                 | 2.304050  | 1.590800  | 0.468660  |
| H                                 | 1.784920  | 2.144420  | -1.130660 |

23

|                    |          |          |          |
|--------------------|----------|----------|----------|
| HSiEt <sub>3</sub> |          |          |          |
| Si                 | 0.18357  | -0.01320 | 0.57896  |
| H                  | 0.45617  | 0.46702  | 1.96546  |
| C                  | -1.17890 | -1.32124 | 0.63099  |
| H                  | -0.81854 | -2.18720 | 1.19881  |
| H                  | -2.03031 | -0.92407 | 1.19648  |
| C                  | -0.39341 | 1.45718  | -0.45801 |
| H                  | 0.35958  | 2.25163  | -0.39580 |
| H                  | -0.42678 | 1.15487  | -1.51271 |
| C                  | 1.77733  | -0.73301 | -0.13401 |
| H                  | 2.09873  | -1.56946 | 0.49814  |
| H                  | 1.56185  | -1.16361 | -1.11993 |
| C                  | -1.63595 | -1.75977 | -0.76657 |
| H                  | -0.80696 | -2.18172 | -1.34369 |
| H                  | -2.42098 | -2.51987 | -0.71859 |
| H                  | -2.03281 | -0.91439 | -1.33862 |
| C                  | 2.90258  | 0.30288  | -0.25189 |

|   |          |          |          |
|---|----------|----------|----------|
| H | 3.82795  | -0.14142 | -0.62973 |
| H | 2.62506  | 1.11214  | -0.93424 |
| H | 3.12687  | 0.75626  | 0.71888  |
| C | -1.76087 | 1.99522  | -0.01857 |
| H | -2.06425 | 2.86791  | -0.60405 |
| H | -2.54165 | 1.23606  | -0.13240 |
| H | -1.74855 | 2.29299  | 1.03486  |

28

|                                        |          |          |          |
|----------------------------------------|----------|----------|----------|
| [SiEt <sub>3</sub> -NCMe] <sup>+</sup> |          |          |          |
| Si                                     | 0.74490  | 0.00025  | 0.00047  |
| N                                      | -1.15236 | -0.00036 | -0.00103 |
| C                                      | 1.10554  | -1.79185 | -0.35404 |
| C                                      | 1.10286  | 0.58969  | 1.73011  |
| C                                      | 1.10541  | 1.20338  | -1.37402 |
| C                                      | 0.70021  | 2.04963  | 1.98692  |
| C                                      | 0.70438  | 0.69666  | -2.76755 |
| C                                      | 0.70439  | -2.74529 | 0.78150  |
| C                                      | -2.30246 | -0.00084 | -0.00134 |
| C                                      | -3.75474 | -0.00162 | -0.00167 |
| H                                      | 0.61253  | -2.07077 | -1.29279 |
| H                                      | 2.18233  | -1.86940 | -0.55257 |
| H                                      | 0.60945  | -0.08387 | 2.44070  |
| H                                      | 2.17959  | 0.45747  | 1.89776  |
| H                                      | 0.61245  | 2.15587  | -1.14633 |
| H                                      | 2.18222  | 1.41403  | -1.34192 |
| H                                      | 0.90791  | 2.33250  | 3.02033  |
| H                                      | 1.25163  | 2.73647  | 1.33997  |
| H                                      | -0.36832 | 2.21141  | 1.81224  |
| H                                      | 0.91442  | 1.45004  | -3.52873 |
| H                                      | 1.25510  | -0.20773 | -3.03810 |
| H                                      | -0.36434 | 0.46590  | -2.82233 |
| H                                      | 0.91484  | -3.78115 | 0.50979  |
| H                                      | 1.25467  | -2.52713 | 1.70021  |
| H                                      | -0.36444 | -2.67754 | 1.00823  |
| H                                      | -4.11220 | 0.06088  | 1.02868  |
| H                                      | -4.11228 | 0.85908  | -0.57146 |
| H                                      | -4.11126 | -0.92563 | -0.46258 |

79

|                                                                  |          |          |          |
|------------------------------------------------------------------|----------|----------|----------|
| [Si(C <sub>6</sub> Me <sub>5</sub> ) <sub>3</sub> ] <sup>+</sup> |          |          |          |
| Si                                                               | -0.04398 | -0.07210 | 0.00443  |
| C                                                                | 1.37039  | -1.24737 | 0.02721  |
| C                                                                | 0.32636  | 1.72957  | -0.00162 |
| C                                                                | -1.79085 | -0.64791 | -0.01628 |
| C                                                                | -2.27436 | -1.48495 | 1.01238  |
| C                                                                | -3.62105 | -1.87035 | 1.00330  |
| C                                                                | -4.45868 | -1.45226 | -0.04547 |
| C                                                                | -3.98764 | -0.57927 | -1.04298 |
| C                                                                | -2.64478 | -0.18639 | -1.04174 |
| C                                                                | -0.19709 | 2.56284  | 1.01039  |

|   |          |          |          |                                                   |          |          |          |
|---|----------|----------|----------|---------------------------------------------------|----------|----------|----------|
| C | 0.10378  | 3.93082  | 0.99478  | H                                                 | 0.18875  | -3.35786 | -2.25162 |
| C | 0.89986  | 4.45727  | -0.03745 | H                                                 | -0.38352 | -1.73255 | -1.94994 |
| C | 1.46705  | 3.61756  | -1.01267 | H                                                 | 0.95276  | -1.99796 | -3.07311 |
| C | 1.16693  | 2.25058  | -1.00942 | H                                                 | 3.91402  | -4.11120 | -2.36876 |
| C | 2.33612  | -1.10827 | 1.04768  | H                                                 | 2.56643  | -5.06506 | -1.75188 |
| C | 3.46122  | -1.93934 | 1.04414  | H                                                 | 2.29075  | -3.82803 | -2.97599 |
| C | 3.59008  | -2.93041 | 0.05355  | H                                                 | 5.08591  | -4.05943 | 1.13030  |
| C | 2.64854  | -3.04222 | -0.98426 | H                                                 | 4.49963  | -4.85390 | -0.32534 |
| C | 1.52342  | -2.20710 | -0.99510 | H                                                 | 5.61488  | -3.49400 | -0.45430 |
| C | 1.15497  | 5.94351  | -0.09660 | H                                                 | 4.53234  | -0.78381 | 2.53238  |
| C | -1.03820 | 2.00296  | 2.13626  | H                                                 | 4.40327  | -2.50185 | 2.91541  |
| C | 2.38564  | 4.20009  | -2.06155 | H                                                 | 5.52490  | -1.94802 | 1.67324  |
| C | 1.71198  | 1.37576  | -2.11843 | H                                                 | 1.11742  | 0.24898  | 2.25522  |
| C | -1.38033 | -1.93440 | 2.14666  | H                                                 | 2.38495  | -0.56587 | 3.13937  |
| C | -4.18308 | -2.72996 | 2.11181  | H                                                 | 2.78459  | 0.76994  | 2.05006  |
| C | -5.88411 | -1.94464 | -0.10116 | H                                                 | -0.72468 | 4.30567  | 2.96729  |
| C | -4.93218 | -0.07857 | -2.11075 | H                                                 | 0.34789  | 5.56727  | 2.38177  |
| C | -2.12578 | 0.67974  | -2.16957 | H                                                 | -1.28164 | 5.42451  | 1.72625  |
| C | 0.52007  | -2.32472 | -2.12085 |                                                   |          |          |          |
| C | 2.86258  | -4.06173 | -2.07894 | 80                                                |          |          |          |
| C | 4.75695  | -3.88614 | 0.10542  | HSi(C <sub>6</sub> Me <sub>5</sub> ) <sub>3</sub> |          |          |          |
| C | 4.53305  | -1.78318 | 2.09773  | Si                                                | 0.00474  | 0.00006  | -0.58051 |
| C | 2.14837  | -0.11296 | 2.17367  | C                                                 | 1.85123  | -0.13115 | -0.13966 |
| C | -0.41632 | 4.84983  | 2.07580  | C                                                 | -0.80785 | 1.66323  | -0.13897 |
| H | 0.32593  | 6.50905  | 0.32884  | C                                                 | -1.03404 | -1.53309 | -0.14288 |
| H | 2.05882  | 6.21192  | 0.46391  | C                                                 | -0.63775 | -2.48588 | 0.81702  |
| H | 1.29345  | 6.28419  | -1.12301 | C                                                 | -1.32594 | -3.70440 | 0.93241  |
| H | -1.29940 | 0.95043  | 1.99362  | C                                                 | -2.45600 | -3.95053 | 0.13879  |
| H | -0.51358 | 2.08015  | 3.09485  | C                                                 | -2.85847 | -3.01043 | -0.82058 |
| H | -1.98363 | 2.54236  | 2.23604  | C                                                 | -2.16572 | -1.79515 | -0.94340 |
| H | 3.02999  | 4.96992  | -1.63308 | C                                                 | -1.83222 | 1.79006  | 0.82055  |
| H | 3.03588  | 3.44417  | -2.50059 | C                                                 | -2.55206 | 2.99033  | 0.93445  |
| H | 1.81982  | 4.66458  | -2.87765 | C                                                 | -2.20800 | 4.09363  | 0.13966  |
| H | 2.79145  | 1.22249  | -2.01868 | C                                                 | -1.19053 | 3.97882  | -0.81839 |
| H | 1.26109  | 0.37909  | -2.14500 | C                                                 | -0.47559 | 2.77637  | -0.93937 |
| H | 1.52813  | 1.82626  | -3.09760 | C                                                 | 2.47589  | 0.69208  | 0.81858  |
| H | -0.32223 | -1.72933 | 1.96180  | C                                                 | 3.87531  | 0.71137  | 0.93212  |
| H | -1.65336 | -1.43995 | 3.08588  | C                                                 | 4.65604  | -0.14217 | 0.13877  |
| H | -1.45790 | -3.01175 | 2.31119  | C                                                 | 4.04533  | -0.96554 | -0.81788 |
| H | -3.58076 | -2.67556 | 3.01783  | C                                                 | 2.64649  | -0.97884 | -0.93919 |
| H | -5.19444 | -2.41629 | 2.37692  | C                                                 | -2.91483 | 5.41696  | 0.33707  |
| H | -4.23485 | -3.78335 | 1.81311  | C                                                 | -2.15351 | 0.66682  | 1.78444  |
| H | -5.98274 | -2.93320 | 0.34747  | C                                                 | -0.87945 | 5.14190  | -1.73564 |
| H | -6.55797 | -1.26838 | 0.43889  | C                                                 | 0.67900  | 2.71665  | -1.91982 |
| H | -6.24264 | -2.01242 | -1.12856 | C                                                 | 0.49900  | -2.20991 | 1.77917  |
| H | -5.92112 | 0.12220  | -1.69482 | C                                                 | -0.83958 | -4.76054 | 1.90163  |
| H | -4.58010 | 0.84751  | -2.56421 | C                                                 | -3.25820 | -5.21789 | 0.33902  |
| H | -5.05802 | -0.81444 | -2.91360 | C                                                 | -4.02376 | -3.31546 | -1.73706 |
| H | -2.45212 | 0.29566  | -3.13942 | C                                                 | -2.68432 | -0.76434 | -1.92659 |
| H | -2.47721 | 1.71307  | -2.08299 | C                                                 | 2.01506  | -1.94759 | -1.91941 |
| H | -1.03285 | 0.72375  | -2.20919 | C                                                 | 4.89441  | -1.82114 | -1.73321 |

|   |          |          |          |                                                                      |           |           |           |
|---|----------|----------|----------|----------------------------------------------------------------------|-----------|-----------|-----------|
| C | 6.15531  | -0.19592 | 0.33640  | 85                                                                   |           |           |           |
| C | 4.54414  | 1.66519  | 1.89869  | [Si(C <sub>6</sub> F <sub>5</sub> ) <sub>3</sub> -NCMe] <sup>+</sup> |           |           |           |
| C | 1.66606  | 1.53628  | 1.78057  | Si                                                                   | -0.002294 | -0.000176 | 0.084485  |
| C | -3.71083 | 3.08959  | 1.90329  | C                                                                    | 0.712187  | 1.713800  | -0.184766 |
| H | 0.00622  | 0.00194  | -2.06672 | C                                                                    | -1.843342 | -0.240039 | -0.185231 |
| H | -3.80207 | 5.50758  | -0.30205 | C                                                                    | -2.527427 | 0.616676  | -1.075721 |
| H | -3.24189 | 5.54204  | 1.37033  | C                                                                    | -3.929212 | 0.602466  | -1.120655 |
| H | -2.25749 | 6.25617  | 0.10495  | C                                                                    | -4.646234 | -0.327500 | -0.350995 |
| H | -2.99485 | 0.05168  | 1.44243  | C                                                                    | -3.970622 | -1.203233 | 0.512719  |
| H | -1.30882 | -0.00940 | 1.91667  | C                                                                    | -2.568660 | -1.177524 | 0.583034  |
| H | -2.40771 | 1.06316  | 2.77041  | C                                                                    | 1.796241  | 1.875856  | -1.075727 |
| H | -0.11499 | 5.80698  | -1.31435 | C                                                                    | 2.487413  | 3.095446  | -1.121043 |
| H | -0.51250 | 4.79652  | -2.70316 | C                                                                    | 2.044121  | 4.181732  | -0.349911 |
| H | -1.76830 | 5.74509  | -1.92739 | C                                                                    | 0.948194  | 4.036174  | 0.514484  |
| H | 1.21927  | 3.66605  | -1.93976 | C                                                                    | 0.265805  | 2.811145  | 0.583372  |
| H | 1.40597  | 1.94761  | -1.65402 | C                                                                    | -1.788878 | 1.516781  | -2.045465 |
| H | 0.33757  | 2.51049  | -2.94153 | C                                                                    | -4.671374 | 1.587056  | -1.996397 |
| H | 0.66816  | -1.14131 | 1.91308  | C                                                                    | -6.149207 | -0.411533 | -0.482559 |
| H | 0.28322  | -2.62900 | 2.76484  | C                                                                    | -4.762009 | -2.172924 | 1.361950  |
| H | 1.44949  | -2.63508 | 1.43406  | C                                                                    | -1.883814 | -2.228238 | 1.435427  |
| H | 0.24148  | -4.70621 | 2.03733  | C                                                                    | -0.986406 | 2.746475  | 1.436077  |
| H | -1.29983 | -4.65568 | 2.89236  | C                                                                    | 0.508131  | 5.206358  | 1.365894  |
| H | -1.06658 | -5.76484 | 1.54026  | C                                                                    | 2.725129  | 5.524200  | -0.481430 |
| H | -3.20621 | -5.56119 | 1.37329  | C                                                                    | 3.709720  | 3.243813  | -1.999095 |
| H | -4.31233 | -5.06107 | 0.10584  | C                                                                    | 2.203661  | 0.786633  | -2.047173 |
| H | -2.89863 | -6.03611 | -0.29747 | N                                                                    | -0.005844 | 0.001413  | 1.994805  |
| H | -4.11030 | -4.38663 | -1.92614 | C                                                                    | -0.009213 | 0.003388  | 3.142810  |
| H | -4.97923 | -2.97721 | -1.31646 | C                                                                    | -0.013176 | 0.004579  | 4.595384  |
| H | -3.90437 | -2.82829 | -2.70576 | H                                                                    | -0.777406 | 1.164018  | -2.255953 |
| H | -3.77673 | -0.76228 | -1.94460 | H                                                                    | -2.312376 | 1.550057  | -3.002797 |
| H | -2.37320 | 0.24826  | -1.66570 | H                                                                    | -1.696298 | 2.545937  | -1.679001 |
| H | -2.33857 | -0.96406 | -2.94814 | H                                                                    | -4.100270 | 2.504261  | -2.141988 |
| H | 2.56122  | -2.89376 | -1.93444 | H                                                                    | -5.623933 | 1.870735  | -1.546991 |
| H | 0.98296  | -2.18555 | -1.65776 | H                                                                    | -4.886657 | 1.170515  | -2.987796 |
| H | 2.01441  | -1.55160 | -2.94225 | H                                                                    | -6.653375 | 0.245189  | 0.236742  |
| H | 5.86204  | -1.35561 | -1.92735 | H                                                                    | -6.508974 | -1.425944 | -0.308896 |
| H | 5.08651  | -2.81470 | -1.30872 | H                                                                    | -6.477703 | -0.118689 | -1.480000 |
| H | 4.41067  | -1.96852 | -2.69976 | H                                                                    | -5.017036 | -3.082914 | 0.805548  |
| H | 6.42756  | 0.02415  | 1.36971  | H                                                                    | -4.213806 | -2.479081 | 2.252715  |
| H | 6.55071  | -1.18589 | 0.10439  | H                                                                    | -5.698432 | -1.725485 | 1.699084  |
| H | 6.67948  | 0.52572  | -0.30262 | H                                                                    | -2.317576 | -3.211588 | 1.235017  |
| H | 3.95172  | 2.57093  | 2.03552  | H                                                                    | -0.815710 | -2.315453 | 1.232455  |
| H | 4.68906  | 1.21574  | 2.88933  | H                                                                    | -2.016959 | -2.043059 | 2.509133  |
| H | 5.52455  | 1.97623  | 1.53423  | H                                                                    | -1.617157 | 3.617160  | 1.237753  |
| H | 0.65816  | 1.14375  | 1.91632  | H                                                                    | -1.600019 | 1.868452  | 1.231074  |
| H | 2.13820  | 1.56238  | 2.76552  | H                                                                    | -0.759193 | 2.765965  | 2.509801  |
| H | 1.55385  | 2.57103  | 1.43424  | H                                                                    | 1.365818  | 5.790174  | 1.703913  |
| H | -3.39275 | 3.43999  | 2.89345  | H                                                                    | -0.150471 | 5.885407  | 0.811124  |
| H | -4.47276 | 3.78151  | 1.54073  | H                                                                    | -0.031706 | 4.884916  | 2.256363  |
| H | -4.19636 | 2.12241  | 2.04067  | H                                                                    | 3.138358  | 5.663968  | -1.480591 |
|   |          |          |          | H                                                                    | 2.029007  | 6.343892  | -0.302317 |

|                                                |           |           |           |                                                                 |           |           |           |
|------------------------------------------------|-----------|-----------|-----------|-----------------------------------------------------------------|-----------|-----------|-----------|
| H                                              | 3.549733  | 5.629115  | 0.234047  | C                                                               | 0.229340  | 4.389470  | 0.000650  |
| H                                              | 4.217856  | 2.290167  | -2.143964 | C                                                               | -1.396730 | -0.712110 | -0.000120 |
| H                                              | 3.454855  | 3.636974  | -2.990650 | C                                                               | -2.515050 | -0.162630 | 0.635400  |
| H                                              | 4.432808  | 3.927388  | -1.552303 | C                                                               | -1.608950 | -1.939930 | -0.635640 |
| H                                              | 1.390540  | 0.090012  | -2.259897 | C                                                               | -3.755220 | -0.781430 | 0.653510  |
| H                                              | 2.496325  | 1.224341  | -3.003478 | C                                                               | -2.838270 | -2.580000 | -0.653830 |
| H                                              | 3.046532  | 0.188559  | -1.681287 | C                                                               | -3.915990 | -1.996430 | -0.000130 |
| H                                              | -0.419573 | -0.943851 | 4.952942  | F                                                               | -1.899060 | 1.803740  | -1.282120 |
| H                                              | -0.632926 | 0.830689  | 4.950519  | F                                                               | -1.741300 | 4.462730  | -1.283100 |
| H                                              | 1.010257  | 0.128345  | 4.955699  | F                                                               | 0.298490  | 5.711060  | 0.000910  |
| C                                              | 1.127120  | -1.474849 | -0.180577 | F                                                               | 2.196970  | 4.255930  | 1.284270  |
| C                                              | 0.731527  | -2.495151 | -1.073686 | F                                                               | 2.076860  | 1.595290  | 1.281250  |
| C                                              | 1.448416  | -3.699853 | -1.120276 | F                                                               | 2.510170  | 0.741980  | -1.284160 |
| C                                              | 2.610269  | -3.855025 | -0.347200 | F                                                               | 4.734350  | -0.723870 | -1.285770 |
| C                                              | 3.025042  | -2.833462 | 0.521200  | F                                                               | 4.796880  | -3.113400 | 0.000230  |
| C                                              | 2.299409  | -1.633609 | 0.591382  | F                                                               | 2.588780  | -4.029240 | 1.286080  |
| C                                              | 3.439272  | -5.111368 | -0.480297 | F                                                               | 0.344280  | -2.595000 | 1.283880  |
| C                                              | -0.416504 | -2.307266 | -2.044730 | F                                                               | -0.612250 | -2.546490 | -1.282150 |
| C                                              | 4.257256  | -3.033944 | 1.375220  | F                                                               | -2.420330 | 1.000420  | 1.281640  |
| C                                              | 2.862553  | -0.516435 | 1.448302  | F                                                               | -4.784870 | -0.226130 | 1.283440  |
| C                                              | 0.972653  | -4.833138 | -2.001476 | F                                                               | -5.095050 | -2.597460 | -0.000200 |
| H                                              | 3.356842  | -5.538140 | -1.480092 | F                                                               | -2.993670 | -3.739480 | -1.283780 |
| H                                              | 4.495997  | -4.912560 | -0.300344 |                                                                 |           |           |           |
| H                                              | 3.121918  | -5.880724 | 0.233997  |                                                                 |           |           |           |
| H                                              | -0.616382 | -1.255310 | -2.257844 | 35                                                              |           |           |           |
| H                                              | -0.183280 | -2.779589 | -3.000876 | [HB(C <sub>6</sub> F <sub>5</sub> ) <sub>3</sub> ] <sup>-</sup> |           |           |           |
| H                                              | -1.354359 | -2.740579 | -1.677714 | B                                                               | -0.07624  | -0.06040  | -0.97638  |
| H                                              | 5.174657  | -2.795310 | 0.823737  | C                                                               | 0.37095   | 1.40393   | -0.38536  |
| H                                              | 4.242882  | -2.409597 | 2.268361  | C                                                               | -1.61404  | -0.46576  | -0.59673  |
| H                                              | 4.339264  | -4.069610 | 1.708880  | C                                                               | 1.05767   | -1.10242  | -0.43322  |
| H                                              | 3.932231  | -0.401461 | 1.253971  | C                                                               | 1.49136   | 2.02243   | -0.93553  |
| H                                              | 2.406310  | 0.452823  | 1.243784  | C                                                               | 1.98959   | 3.24572   | -0.50679  |
| H                                              | 2.762840  | -0.725495 | 2.521243  | C                                                               | 1.35968   | 3.90415   | 0.53865   |
| H                                              | -0.107524 | -4.802313 | -2.146380 | C                                                               | 0.25023   | 3.32421   | 1.13158   |
| H                                              | 1.440412  | -4.803649 | -2.992975 | C                                                               | -0.21162  | 2.09526   | 0.67067   |
| H                                              | 1.208442  | -5.801004 | -1.557253 | C                                                               | -2.63938  | 0.43506   | -0.88078  |
|                                                |           |           |           | C                                                               | -3.98504  | 0.18217   | -0.66324  |
|                                                |           |           |           | C                                                               | -4.36734  | -1.04266  | -0.13499  |
|                                                |           |           |           | C                                                               | -3.39187  | -1.97749  | 0.16207   |
|                                                |           |           |           | C                                                               | -2.05232  | -1.67625  | -0.07298  |
|                                                |           |           |           | C                                                               | 2.01819   | -1.68494  | -1.24871  |
|                                                |           |           |           | C                                                               | 3.03713   | -2.49932  | -0.75906  |
|                                                |           |           |           | C                                                               | 3.11982   | -2.74790  | 0.60055   |
|                                                |           |           |           | C                                                               | 2.18479   | -2.18086  | 1.45691   |
|                                                |           |           |           | C                                                               | 1.19116   | -1.37423  | 0.92456   |
|                                                |           |           |           | F                                                               | 2.16057   | 1.42522   | -1.93381  |
|                                                |           |           |           | F                                                               | 3.06944   | 3.79404   | -1.07999  |
|                                                |           |           |           | F                                                               | 1.82091   | 5.08409   | 0.97123   |
|                                                |           |           |           | F                                                               | -0.35859  | 3.95054   | 2.14716   |
|                                                |           |           |           | F                                                               | -1.28217  | 1.60183   | 1.31178   |
|                                                |           |           |           | F                                                               | -2.33969  | 1.64105   | -1.39003  |
|                                                |           |           |           | F                                                               | -4.91845  | 1.09718   | -0.95702  |
| 34                                             |           |           |           |                                                                 |           |           |           |
| B(C <sub>6</sub> F <sub>5</sub> ) <sub>3</sub> |           |           |           |                                                                 |           |           |           |
| B                                              | -0.000120 | -0.000030 | -0.000360 |                                                                 |           |           |           |
| C                                              | 1.314780  | -0.853570 | -0.000240 |                                                                 |           |           |           |
| C                                              | 1.398460  | -2.096160 | 0.636440  |                                                                 |           |           |           |
| C                                              | 2.483810  | -0.423980 | -0.636770 |                                                                 |           |           |           |
| C                                              | 2.554550  | -2.860580 | 0.654850  |                                                                 |           |           |           |
| C                                              | 3.652860  | -1.168430 | -0.654800 |                                                                 |           |           |           |
| C                                              | 3.686770  | -2.392930 | 0.000090  |                                                                 |           |           |           |
| C                                              | 0.081750  | 1.565510  | -0.000340 |                                                                 |           |           |           |
| C                                              | -0.875380 | 2.363520  | -0.635580 |                                                                 |           |           |           |
| C                                              | 1.116850  | 2.258990  | 0.635350  |                                                                 |           |           |           |
| C                                              | -0.814950 | 3.748190  | -0.653290 |                                                                 |           |           |           |
| C                                              | 1.201070  | 3.642390  | 0.654090  |                                                                 |           |           |           |

|   |          |          |          |
|---|----------|----------|----------|
| F | -5.66035 | -1.31495 | 0.07993  |
| F | -3.74602 | -3.16673 | 0.66739  |
| F | -1.18821 | -2.65853 | 0.23586  |
| F | 2.00929  | -1.49187 | -2.57423 |
| F | 3.94040  | -3.04436 | -1.58562 |
| F | 4.09191  | -3.52903 | 1.08735  |
| F | 2.26300  | -2.41884 | 2.77284  |
| F | 0.30939  | -0.84328 | 1.78693  |
| H | -0.01545 | -0.00191 | -2.18162 |

40

B(C<sub>6</sub>F<sub>5</sub>)<sub>3</sub>-NCMe

|   |          |          |          |
|---|----------|----------|----------|
| B | 0.07219  | -0.06470 | 0.60582  |
| C | -0.30292 | 1.41763  | 0.04344  |
| C | 1.58732  | -0.55841 | 0.28941  |
| C | -1.12390 | -1.07614 | 0.18266  |
| C | -1.40980 | 2.08395  | 0.56122  |
| C | -1.84574 | 3.32034  | 0.10891  |
| C | -1.15910 | 3.93500  | -0.92902 |
| C | -0.05962 | 3.30205  | -1.48988 |
| C | 0.34671  | 2.06439  | -1.00240 |
| C | 2.64357  | 0.27148  | 0.65852  |
| C | 3.97698  | -0.02923 | 0.43783  |
| C | 4.29893  | -1.22894 | -0.18465 |
| C | 3.28498  | -2.09304 | -0.56465 |
| C | 1.95728  | -1.75157 | -0.31990 |
| C | -2.07314 | -1.67226 | 1.00004  |
| C | -3.11585 | -2.45078 | 0.50626  |
| C | -3.23551 | -2.64641 | -0.85959 |
| C | -2.31016 | -2.06372 | -1.71833 |
| C | -1.29133 | -1.29417 | -1.18308 |
| F | -2.11780 | 1.51825  | 1.55750  |
| F | -2.90674 | 3.91405  | 0.65364  |
| F | -1.55458 | 5.11933  | -1.38349 |
| F | 0.59734  | 3.88336  | -2.49056 |
| F | 1.40586  | 1.51249  | -1.60072 |
| F | 2.37329  | 1.43953  | 1.26688  |
| F | 4.94233  | 0.80635  | 0.81719  |
| F | 5.56988  | -1.54738 | -0.40412 |
| F | 3.58572  | -3.25008 | -1.15010 |
| F | 1.04663  | -2.65423 | -0.69856 |
| F | -2.03371 | -1.53166 | 2.33890  |
| F | -3.99791 | -3.00249 | 1.33893  |
| F | -4.22514 | -3.38759 | -1.34668 |
| F | -2.41617 | -2.24726 | -3.03178 |
| F | -0.41222 | -0.74816 | -2.03392 |
| N | 0.06065  | 0.08365  | 2.18752  |
| C | 0.02746  | 0.19886  | 3.32479  |
| C | -0.06521 | 0.31790  | 4.76975  |
| H | -0.85927 | -0.34643 | 5.11690  |
| H | -0.30735 | 1.34920  | 5.03110  |

|   |         |         |         |
|---|---------|---------|---------|
| H | 0.88454 | 0.03297 | 5.22442 |
|---|---------|---------|---------|

34

B(C<sub>6</sub>F<sub>5</sub>)<sub>2</sub>Ph

|   |           |           |           |
|---|-----------|-----------|-----------|
| B | 0.000020  | 0.755480  | -0.000050 |
| C | 1.346700  | -0.053560 | 0.103210  |
| C | 2.504990  | 0.327180  | -0.578200 |
| C | 1.442470  | -1.225990 | 0.856260  |
| C | 3.688150  | -0.396910 | -0.511680 |
| C | 2.610520  | -1.965450 | 0.958960  |
| C | 3.739410  | -1.545660 | 0.265960  |
| C | 0.000060  | 2.303110  | -0.000030 |
| C | -1.061040 | 3.030010  | -0.568390 |
| C | 1.061220  | 3.029940  | 0.568340  |
| C | -1.058090 | 4.418620  | -0.582990 |
| H | -1.892950 | 2.494630  | -1.018440 |
| C | 1.058350  | 4.418540  | 0.582970  |
| H | 1.893080  | 2.494500  | 1.018380  |
| C | 0.000150  | 5.113340  | -0.000010 |
| H | -1.879340 | 4.960880  | -1.039690 |
| H | 1.879630  | 4.960750  | 1.039680  |
| H | 0.000190  | 6.198960  | 0.000000  |
| C | -1.346710 | -0.053490 | -0.103250 |
| C | -1.442600 | -1.225860 | -0.856380 |
| C | -2.504930 | 0.327260  | 0.578270  |
| C | -2.610690 | -1.965260 | -0.959030 |
| C | -3.688120 | -0.396780 | 0.511800  |
| C | -3.739500 | -1.545460 | -0.265920 |
| F | 2.506000  | 1.404870  | -1.363930 |
| F | 4.764780  | -0.005000 | -1.186410 |
| F | 4.863270  | -2.243520 | 0.345350  |
| F | 2.660980  | -3.065290 | 1.703980  |
| F | 0.382870  | -1.671930 | 1.536700  |
| F | -0.383060 | -1.671800 | -1.536930 |
| F | -2.505820 | 1.404890  | 1.364090  |
| F | -4.764680 | -0.004870 | 1.186650  |
| F | -4.863400 | -2.243270 | -0.345260 |
| F | -2.661260 | -3.065050 | -1.704130 |

35

[HB(C<sub>6</sub>F<sub>5</sub>)<sub>2</sub>Ph]<sup>-</sup>

|   |          |          |          |
|---|----------|----------|----------|
| B | -0.02561 | 0.67634  | -1.02415 |
| C | 1.28851  | -0.16687 | -0.50258 |
| C | 0.07481  | 2.26138  | -0.68936 |
| C | -1.35963 | -0.02948 | -0.38390 |
| C | 1.63283  | -1.36525 | -1.12449 |
| C | 2.72586  | -2.14286 | -0.76150 |
| C | 3.53278  | -1.72914 | 0.28705  |
| C | 3.22689  | -0.55195 | 0.95026  |
| C | 2.12005  | 0.19399  | 0.55503  |
| C | 1.15333  | 3.00359  | -1.19997 |



|                                                        |          |          |          |                                                  |           |           |           |
|--------------------------------------------------------|----------|----------|----------|--------------------------------------------------|-----------|-----------|-----------|
| C                                                      | 1.28833  | 4.37002  | -0.98311 | F                                                | -1.99083  | 1.06039   | -1.72909  |
| C                                                      | 0.32763  | 5.05747  | -0.24114 | F                                                | 2.43338   | -0.25249  | 2.14944   |
| C                                                      | -0.75585 | 4.35341  | 0.27239  | F                                                | 4.45327   | -1.63948  | 1.15134   |
| C                                                      | -0.87137 | 2.98056  | 0.04991  | F                                                | 4.54634   | -2.26500  | -1.49699  |
| C                                                      | -2.41635 | -0.50647 | -1.15222 | F                                                | 2.53409   | -1.45623  | -3.14349  |
| C                                                      | -3.54274 | -1.11908 | -0.60981 | F                                                | 0.47014   | -0.05536  | -2.15617  |
| C                                                      | -3.64370 | -1.27173 | 0.76359  | N                                                | 0.06374   | 0.91950   | 2.06151   |
| C                                                      | -2.61861 | -0.80862 | 1.57525  | C                                                | 0.13176   | 1.07870   | 3.19224   |
| C                                                      | -1.51284 | -0.20589 | 0.98869  | C                                                | 0.26541   | 1.24888   | 4.62926   |
| F                                                      | 0.88884  | -1.83837 | -2.13669 | H                                                | -1.97516  | 2.64327   | 0.80633   |
| F                                                      | 3.00979  | -3.28522 | -1.40461 | H                                                | -2.07858  | 5.00140   | 0.09814   |
| F                                                      | 4.59219  | -2.46111 | 0.65666  | H                                                | -0.20547  | 5.99613   | -1.19570  |
| F                                                      | 3.99844  | -0.15266 | 1.97139  | H                                                | 1.76887   | 4.60412   | -1.76230  |
| F                                                      | 1.89222  | 1.30532  | 1.26477  | H                                                | 1.87960   | 2.25426   | -1.03614  |
| F                                                      | -2.40448 | -0.39472 | -2.48753 | H                                                | -0.49873  | 0.65854   | 5.13706   |
| F                                                      | -4.53390 | -1.56269 | -1.39632 | H                                                | 0.15521   | 2.30294   | 4.88755   |
| F                                                      | -4.72124 | -1.85649 | 1.30270  | H                                                | 1.25634   | 0.89663   | 4.92320   |
| F                                                      | -2.71255 | -0.94941 | 2.90470  |                                                  |           |           |           |
| F                                                      | -0.55780 | 0.22815  | 1.82644  |                                                  |           |           |           |
| H                                                      | -0.06631 | 0.54228  | -2.22708 | 34                                               |           |           |           |
| H                                                      | 1.91040  | 2.48230  | -1.78468 | B(C <sub>6</sub> F <sub>5</sub> )Ph <sub>2</sub> |           |           |           |
| H                                                      | 2.14195  | 4.90460  | -1.39358 | B                                                | 0.897430  | 0.000030  | 0.000140  |
| H                                                      | 0.42454  | 6.12603  | -0.06825 | C                                                | -0.686060 | -0.000010 | 0.000070  |
| H                                                      | -1.51467 | 4.87303  | 0.85298  | C                                                | -1.425950 | -0.930390 | -0.730670 |
| H                                                      | -1.73085 | 2.45632  | 0.46310  | C                                                | -1.426060 | 0.930330  | 0.730750  |
|                                                        |          |          |          | C                                                | -2.814250 | -0.941240 | -0.748550 |
| 40                                                     |          |          |          | C                                                | -2.814360 | 0.941100  | 0.748520  |
| B(C <sub>6</sub> F <sub>5</sub> ) <sub>2</sub> Ph-NCMe |          |          |          | C                                                | -3.508980 | -0.000090 | -0.000040 |
| B                                                      | 0.01437  | 0.74255  | 0.47842  | C                                                | 1.645050  | -1.351100 | 0.200340  |
| C                                                      | -1.31884 | -0.15474 | 0.19732  | C                                                | 2.926390  | -1.569830 | -0.336160 |
| C                                                      | -0.03718 | 2.26462  | -0.05756 | C                                                | 1.049780  | -2.406070 | 0.914530  |
| C                                                      | 1.33877  | -0.09263 | 0.03524  | C                                                | 3.583630  | -2.783760 | -0.166280 |
| C                                                      | -1.60955 | -1.26701 | 0.98315  | H                                                | 3.402600  | -0.781360 | -0.912070 |
| C                                                      | -2.69702 | -2.10126 | 0.76978  | C                                                | 1.710520  | -3.612160 | 1.110910  |
| C                                                      | -3.54506 | -1.83891 | -0.29686 | H                                                | 0.055000  | -2.270000 | 1.331760  |
| C                                                      | -3.28477 | -0.75736 | -1.12468 | C                                                | 2.979110  | -3.802790 | 0.565800  |
| C                                                      | -2.18464 | 0.05740  | -0.87365 | H                                                | 4.565510  | -2.936430 | -0.602630 |
| C                                                      | -1.14107 | 3.07236  | 0.25173  | H                                                | 1.237160  | -4.407040 | 1.678150  |
| C                                                      | -1.20770 | 4.40136  | -0.14815 | H                                                | 3.493500  | -4.748380 | 0.706940  |
| C                                                      | -0.15773 | 4.95978  | -0.87624 | C                                                | 1.644980  | 1.351190  | -0.200220 |
| C                                                      | 0.94771  | 4.17881  | -1.19340 | C                                                | 1.049580  | 2.406090  | -0.914390 |
| C                                                      | 1.00412  | 2.84692  | -0.78328 | C                                                | 2.926360  | 1.570000  | 0.336140  |
| C                                                      | 2.39268  | -0.52481 | 0.83060  | C                                                | 1.710240  | 3.612210  | -1.110900 |
| C                                                      | 3.47102  | -1.25239 | 0.33776  | H                                                | 0.054750  | 2.269950  | -1.331510 |
| C                                                      | 3.52149  | -1.57266 | -1.00937 | C                                                | 3.583520  | 2.783960  | 0.166140  |
| C                                                      | 2.49385  | -1.15858 | -1.84690 | H                                                | 3.402660  | 0.781580  | 0.912050  |
| C                                                      | 1.43561  | -0.43856 | -1.31204 | C                                                | 2.978870  | 3.802920  | -0.565930 |
| F                                                      | -0.80492 | -1.58331 | 2.01616  | H                                                | 1.236780  | 4.407040  | -1.678130 |
| F                                                      | -2.92875 | -3.14365 | 1.56822  | H                                                | 4.565440  | 2.936690  | 0.602380  |
| F                                                      | -4.59463 | -2.62252 | -0.52554 | H                                                | 3.493200  | 4.748530  | -0.707170 |
| F                                                      | -4.08845 | -0.50970 | -2.15727 | F                                                | -0.803360 | -1.844470 | -1.477880 |
|                                                        |          |          |          | F                                                | -3.482240 | -1.835910 | -1.472270 |

|   |           |           |           |
|---|-----------|-----------|-----------|
| F | -4.835920 | -0.000130 | -0.000100 |
| F | -3.482460 | 1.835740  | 1.472180  |
| F | -0.803580 | 1.844450  | 1.477990  |

35

[HB(C<sub>6</sub>F<sub>5</sub>)Ph<sub>2</sub>]<sup>-</sup>

|   |          |          |          |
|---|----------|----------|----------|
| B | -0.86819 | -0.10161 | -0.95830 |
| C | 0.69143  | 0.08314  | -0.45665 |
| C | -1.78319 | 1.19317  | -0.58803 |
| C | -1.41769 | -1.49689 | -0.31169 |
| C | 1.79165  | -0.07402 | -1.29308 |
| C | 3.11098  | 0.03667  | -0.86186 |
| C | 3.37351  | 0.31801  | 0.46860  |
| C | 2.31240  | 0.48226  | 1.34679  |
| C | 1.01330  | 0.35667  | 0.87109  |
| C | -1.26456 | 2.45941  | -0.27897 |
| C | -2.07877 | 3.56533  | -0.03765 |
| C | -3.46391 | 3.44090  | -0.09330 |
| C | -4.01476 | 2.19696  | -0.39638 |
| C | -3.18564 | 1.10454  | -0.63680 |
| C | -1.17698 | -2.71716 | -0.96249 |
| C | -1.58200 | -3.94001 | -0.43210 |
| C | -2.25632 | -3.98160 | 0.78657  |
| C | -2.51184 | -2.78844 | 1.45831  |
| C | -2.09541 | -1.57371 | 0.91543  |
| F | 1.63566  | -0.35353 | -2.59758 |
| F | 4.13388  | -0.12438 | -1.71577 |
| F | 4.63687  | 0.42998  | 0.90293  |
| F | 2.55939  | 0.75387  | 2.63696  |
| F | 0.03630  | 0.52240  | 1.77734  |
| H | -0.85015 | -0.22472 | -2.16962 |
| H | -0.18443 | 2.58774  | -0.23009 |
| H | -1.62941 | 4.52731  | 0.19924  |
| H | -4.10460 | 4.29788  | 0.09818  |
| H | -5.09526 | 2.07900  | -0.44338 |
| H | -3.63524 | 0.14002  | -0.86646 |
| H | -2.30499 | -0.65163 | 1.45309  |
| H | -0.65389 | -2.69530 | -1.91733 |
| H | -1.37647 | -4.86273 | -0.97054 |
| H | -2.57985 | -4.93096 | 1.20591  |
| H | -3.03683 | -2.80511 | 2.41096  |

40

B(C<sub>6</sub>F<sub>5</sub>)Ph<sub>2</sub>-NCMe

|   |          |          |          |
|---|----------|----------|----------|
| B | 0.80429  | -0.09401 | 0.29710  |
| C | -0.81254 | 0.08379  | 0.17181  |
| C | 1.64985  | 1.26541  | 0.05700  |
| C | 1.28016  | -1.39243 | -0.54480 |
| C | -1.78281 | -0.18893 | 1.12762  |
| C | -3.14790 | -0.05790 | 0.89439  |
| C | -3.59007 | 0.36024  | -0.34988 |

|   |          |          |          |
|---|----------|----------|----------|
| C | -2.65987 | 0.63887  | -1.34281 |
| C | -1.30836 | 0.49003  | -1.06700 |
| C | 1.05501  | 2.52882  | -0.02715 |
| C | 1.81628  | 3.68546  | -0.18459 |
| C | 3.20342  | 3.60324  | -0.25570 |
| C | 3.82158  | 2.35780  | -0.16769 |
| C | 3.05006  | 1.20984  | -0.01357 |
| C | 0.99147  | -2.68752 | -0.09375 |
| C | 1.34099  | -3.81498 | -0.83060 |
| C | 1.98493  | -3.66823 | -2.05708 |
| C | 2.26653  | -2.39159 | -2.53440 |
| C | 1.91718  | -1.26973 | -1.78509 |
| F | -1.44599 | -0.61361 | 2.36347  |
| F | -4.02899 | -0.33285 | 1.85754  |
| F | -4.89180 | 0.49353  | -0.59167 |
| F | -3.07357 | 1.03899  | -2.54404 |
| F | -0.45470 | 0.76380  | -2.06060 |
| N | 1.12697  | -0.44478 | 1.82606  |
| C | 1.41595  | -0.66406 | 2.91202  |
| C | 1.74281  | -0.94071 | 4.30198  |
| H | -0.02728 | 2.61574  | 0.03167  |
| H | 1.32485  | 4.65134  | -0.25391 |
| H | 3.79922  | 4.50209  | -0.38131 |
| H | 4.90343  | 2.28198  | -0.22587 |
| H | 3.54385  | 0.24112  | 0.03989  |
| H | 0.46839  | -2.81965 | 0.85336  |
| H | 1.10666  | -4.80633 | -0.45392 |
| H | 2.25915  | -4.54310 | -2.63844 |
| H | 2.75968  | -2.26756 | -3.49392 |
| H | 2.13995  | -0.27834 | -2.16994 |
| H | 0.81350  | -1.03159 | 4.86748  |
| H | 2.34089  | -0.12208 | 4.70505  |
| H | 2.30488  | -1.87357 | 4.36552  |

34

BPh<sub>3</sub>

|   |           |           |           |
|---|-----------|-----------|-----------|
| B | 0.000460  | -0.000110 | -0.000260 |
| C | -0.732810 | -1.384860 | 0.000040  |
| C | -0.171710 | -2.509190 | -0.631650 |
| C | -1.978220 | -1.552010 | 0.631740  |
| C | -0.826110 | -3.736650 | -0.645500 |
| H | 0.789710  | -2.411220 | -1.128920 |
| C | -2.626180 | -2.782860 | 0.645940  |
| H | -2.437140 | -0.701410 | 1.128810  |
| C | -2.052620 | -3.876020 | 0.000290  |
| H | -0.379560 | -4.585670 | -1.153520 |
| H | -3.579460 | -2.890130 | 1.153940  |
| H | -2.560920 | -4.835460 | 0.000390  |
| C | 1.566310  | 0.057680  | 0.000170  |
| C | 2.258850  | 1.105420  | -0.632860 |
| C | 2.334340  | -0.936170 | 0.632930  |

|                                   |           |           |           |                        |          |          |          |
|-----------------------------------|-----------|-----------|-----------|------------------------|----------|----------|----------|
| C                                 | 3.649030  | 1.152980  | -0.647190 | H                      | 2.14615  | 1.51052  | 1.81610  |
| H                                 | 1.692790  | 1.888230  | -1.130820 | C                      | 1.58164  | 3.96288  | -0.46437 |
| C                                 | 3.724240  | -0.881280 | 0.646660  | H                      | -0.02279 | 3.94394  | -1.89742 |
| H                                 | 1.827620  | -1.758530 | 1.131080  | H                      | 3.06318  | 3.68050  | 1.07447  |
| C                                 | 4.383550  | 0.161500  | -0.000440 | H                      | 1.98060  | 4.91918  | -0.79378 |
| H                                 | 4.160560  | 1.963810  | -1.156300 | H                      | -0.00012 | -0.00026 | 2.13669  |
| H                                 | 4.294290  | -1.652310 | 1.155450  |                        |          |          |          |
| H                                 | 5.468590  | 0.201410  | -0.000700 |                        |          |          |          |
| C                                 | -0.832580 | 1.327120  | -0.000280 | 40                     |          |          |          |
| C                                 | -2.085940 | 1.403100  | -0.633750 | BPh <sub>3</sub> -NCMe |          |          |          |
| C                                 | -0.356470 | 2.488860  | 0.633520  | B                      | 0.00032  | -0.00021 | 0.16893  |
| C                                 | -2.822530 | 2.583050  | -0.647600 | C                      | 1.46747  | -0.56916 | -0.21469 |
| H                                 | -2.480480 | 0.521660  | -1.132360 | C                      | 2.31194  | 0.09202  | -1.11355 |
| C                                 | -1.099380 | 3.664850  | 0.647890  | C                      | 1.92598  | -1.78540 | 0.31585  |
| H                                 | 0.608890  | 2.461200  | 1.132040  | C                      | 3.55702  | -0.43012 | -1.46446 |
| C                                 | -2.331840 | 3.714560  | 0.000290  | C                      | 3.16857  | -2.31296 | -0.01981 |
| H                                 | -3.780300 | 2.620690  | -1.157090 | C                      | 3.99181  | -1.63162 | -0.91498 |
| H                                 | -0.717190 | 4.543730  | 1.157610  | C                      | -0.24055 | 1.55514  | -0.21336 |
| H                                 | -2.909290 | 4.634040  | 0.000560  | C                      | -1.23180 | 1.95562  | -1.11629 |
|                                   |           |           |           | C                      | 0.58012  | 2.56077  | 0.32157  |
|                                   |           |           |           | C                      | -1.40189 | 3.29504  | -1.46698 |
| 35                                |           |           |           | C                      | 0.41583  | 3.90077  | -0.01377 |
| [HBPh <sub>3</sub> ] <sup>-</sup> |           |           |           | C                      | -0.58218 | 4.27273  | -0.91313 |
| B                                 | -0.00016  | -0.00007  | 0.90791   | C                      | -1.22652 | -0.98571 | -0.21449 |
| C                                 | -1.53050  | -0.26993  | 0.40251   | C                      | -1.07804 | -2.04550 | -1.11619 |
| C                                 | -1.86705  | -1.12188  | -0.66044  | C                      | -2.50806 | -0.77569 | 0.31887  |
| C                                 | -2.60490  | 0.40574   | 1.00827   | C                      | -2.15360 | -2.86165 | -1.46710 |
| C                                 | -3.18325  | -1.29517  | -1.09239  | C                      | -3.58701 | -1.58700 | -0.01672 |
| H                                 | -1.07015  | -1.66995  | -1.16003  | C                      | -3.41045 | -2.63851 | -0.91473 |
| C                                 | -3.92321  | 0.24646   | 0.59121   | N                      | 0.00053  | -0.00132 | 1.79881  |
| H                                 | -2.38603  | 1.07929   | 1.83564   | C                      | 0.00036  | -0.00246 | 2.94543  |
| C                                 | -4.22187  | -0.61148  | -0.46750  | C                      | 0.00033  | -0.00399 | 4.40178  |
| H                                 | -3.39843  | -1.96783  | -1.92030  | H                      | 1.98868  | 1.03454  | -1.54735 |
| H                                 | -4.72314  | 0.78861   | 1.09172   | H                      | 1.28340  | -2.34141 | 0.99806  |
| H                                 | -5.24923  | -0.74419  | -0.79785  | H                      | 4.18856  | 0.10496  | -2.16768 |
| C                                 | 0.99861   | -1.19065  | 0.40252   | H                      | 3.49442  | -3.25638 | 0.40896  |
| C                                 | 1.91313   | -1.05340  | -0.65278  | H                      | 4.96192  | -2.03838 | -1.18402 |
| C                                 | 0.94229   | -2.46198  | 1.00130   | H                      | -1.88378 | 1.20411  | -1.55352 |
| C                                 | 2.72164   | -2.10676  | -1.08386  | H                      | 1.38019  | 2.28264  | 1.00715  |
| H                                 | 1.99589   | -0.08699  | -1.14693  | H                      | -2.17817 | 3.57417  | -2.17350 |
| C                                 | 1.73954   | -3.52414  | 0.58501   | H                      | 1.06726  | 4.65499  | 0.41849  |
| H                                 | 0.24263   | -2.61148  | 1.82242   | H                      | -0.71478 | 5.31634  | -1.18191 |
| C                                 | 2.64056   | -3.35099  | -0.46591  | H                      | -0.10098 | -2.23591 | -1.55222 |
| H                                 | 3.41845   | -1.95458  | -1.90576  | H                      | -2.66687 | 0.05722  | 1.00336  |
| H                                 | 1.66338   | -4.49033  | 1.07997   | H                      | -2.00745 | -3.67448 | -2.17253 |
| H                                 | 3.26924   | -4.17451  | -0.79573  | H                      | -4.56613 | -1.39836 | 0.41431  |
| C                                 | 0.53155   | 1.46034   | 0.40295   | H                      | -4.24841 | -3.27446 | -1.18370 |
| C                                 | -0.04790  | 2.18690   | -0.64830  | H                      | 0.96300  | -0.36882 | 4.76313  |
| C                                 | 1.66413   | 2.04429   | 0.99825   | H                      | -0.79667 | -0.65587 | 4.76272  |
| C                                 | 0.46005   | 3.41405   | -1.07870  | H                      | -0.16543 | 1.01156  | 4.76454  |
| H                                 | -0.92873  | 1.77764   | -1.13984  |                        |          |          |          |
| C                                 | 2.18552   | 3.26587   | 0.58242   | 22                     |          |          |          |

BEt<sub>3</sub>

|   |           |           |           |
|---|-----------|-----------|-----------|
| B | -0.007510 | -0.004080 | -0.694580 |
| C | 0.380220  | 1.527080  | -0.642750 |
| H | 1.066860  | 1.752730  | -1.471360 |
| H | -0.485760 | 2.191890  | -0.751930 |
| C | -1.526710 | -0.434400 | -0.637150 |
| H | -1.669460 | -1.515780 | -0.756720 |
| H | -2.069630 | 0.055410  | -1.458480 |
| C | 1.126010  | -1.104050 | -0.652590 |
| H | 0.956650  | -1.834280 | -1.456660 |
| H | 2.130780  | -0.688400 | -0.798960 |
| C | 1.106740  | 1.838920  | 0.681750  |
| H | 2.009020  | 1.227150  | 0.789600  |
| H | 1.408180  | 2.889520  | 0.738350  |
| H | 0.465670  | 1.633210  | 1.546670  |
| C | 1.069120  | -1.852180 | 0.695420  |
| H | 0.091110  | -2.322560 | 0.843930  |
| H | 1.828700  | -2.638060 | 0.752440  |
| H | 1.237040  | -1.170870 | 1.537410  |
| C | -2.153880 | 0.025380  | 0.694950  |
| H | -2.071190 | 1.110950  | 0.815980  |
| H | -3.215130 | -0.235880 | 0.752040  |
| H | -1.654270 | -0.439030 | 1.552800  |

## 23

[HBEt<sub>3</sub>]<sup>-</sup>

|   |          |          |          |
|---|----------|----------|----------|
| B | -0.00021 | 0.00001  | 0.29919  |
| H | -0.00070 | 0.00014  | 1.54564  |
| C | -1.50720 | 0.42388  | -0.22448 |
| H | -1.79938 | 1.39912  | 0.19794  |
| H | -1.50873 | 0.57147  | -1.32075 |
| C | 0.38630  | -1.51735 | -0.22368 |
| H | -0.31155 | -2.25790 | 0.19996  |
| H | 0.25818  | -1.59330 | -1.31977 |
| C | 1.12098  | 1.09306  | -0.22351 |
| H | 2.11095  | 0.85859  | 0.20058  |
| H | 1.25123  | 1.02002  | -1.31955 |
| C | 1.81074  | -1.95835 | 0.12674  |
| H | 2.03837  | -3.00318 | -0.13624 |
| H | 2.55259  | -1.32969 | -0.38023 |
| H | 1.98794  | -1.84264 | 1.20387  |
| C | 0.79097  | 2.54723  | 0.12686  |
| H | 1.58213  | 3.26662  | -0.13620 |
| H | -0.12436 | 2.87550  | -0.38006 |
| H | 0.60223  | 2.64291  | 1.20400  |
| C | -2.60163 | -0.58848 | 0.12721  |
| H | -3.62016 | -0.26347 | -0.13664 |
| H | -2.42817 | -1.54617 | -0.37810 |
| H | -2.59041 | -0.79803 | 1.20469  |

## 28

BEt<sub>3</sub>-NCMe

|   |          |          |          |
|---|----------|----------|----------|
| B | -0.32882 | -0.13269 | 0.01506  |
| N | 1.28384  | -0.27870 | 0.12227  |
| C | -0.55404 | 0.79928  | -1.30052 |
| C | -0.71930 | 0.57545  | 1.42997  |
| C | -0.85974 | -1.66871 | -0.16467 |
| C | -2.22368 | 0.82771  | 1.56928  |
| C | -2.22039 | -1.77541 | -0.86513 |
| C | 0.01746  | 2.21652  | -1.21533 |
| C | 2.42552  | -0.36306 | 0.20267  |
| C | 3.87552  | -0.47105 | 0.30508  |
| H | -0.15926 | 0.29456  | -2.19509 |
| H | -1.63765 | 0.86718  | -1.46711 |
| H | -0.18740 | 1.53091  | 1.54653  |
| H | -0.38979 | -0.05344 | 2.27010  |
| H | -0.13933 | -2.25878 | -0.75055 |
| H | -0.91820 | -2.16386 | 0.81557  |
| H | -2.47106 | 1.37074  | 2.48754  |
| H | -2.60832 | 1.41412  | 0.72699  |
| H | -2.77961 | -0.11500 | 1.58910  |
| H | -2.58475 | -2.80764 | -0.89950 |
| H | -2.15732 | -1.41553 | -1.89685 |
| H | -2.98547 | -1.17358 | -0.36486 |
| H | -0.11881 | 2.78303  | -2.14235 |
| H | -0.46072 | 2.78472  | -0.41084 |
| H | 1.09384  | 2.20570  | -0.99923 |
| H | 4.34188  | 0.21849  | -0.40017 |
| H | 4.18243  | -1.49169 | 0.07185  |
| H | 4.18871  | -0.21992 | 1.31953  |

## 12

## Q

|   |           |           |           |
|---|-----------|-----------|-----------|
| C | -1.297754 | 0.603643  | -0.131806 |
| C | -1.047532 | -0.494437 | -0.850958 |
| C | 0.269687  | -1.183746 | -0.775123 |
| C | 1.297751  | -0.603646 | 0.131810  |
| C | 1.047531  | 0.494434  | 0.850962  |
| C | -0.269706 | 1.183713  | 0.775166  |
| O | -0.497283 | 2.181859  | 1.429176  |
| O | 0.497289  | -2.181849 | -1.429190 |
| H | -2.247465 | 1.128127  | -0.165525 |
| H | -1.776015 | -0.940757 | -1.520497 |
| H | 2.247473  | -1.128112 | 0.165505  |
| H | 1.776024  | 0.940771  | 1.520478  |

## 12

[Q]<sup>-</sup>

|   |           |           |           |
|---|-----------|-----------|-----------|
| C | -1.253600 | 0.613810  | -0.104004 |
| C | -0.997726 | -0.508975 | -0.839392 |
| C | 0.274767  | -1.205688 | -0.789688 |
| C | 1.253600  | -0.613809 | 0.104003  |

|                   |           |           |           |                                      |           |           |           |
|-------------------|-----------|-----------|-----------|--------------------------------------|-----------|-----------|-----------|
| C                 | 0.997726  | 0.508975  | 0.839392  | H                                    | -1.771191 | -0.902473 | -1.488938 |
| C                 | -0.274767 | 1.205688  | 0.789688  | H                                    | 2.213842  | -1.100307 | 0.170224  |
| O                 | -0.510408 | 2.239692  | 1.466927  | H                                    | 1.736925  | 0.964732  | 1.522186  |
| O                 | 0.510408  | -2.239693 | -1.466926 | H                                    | -1.340237 | 2.605555  | 1.374578  |
| H                 | -2.216949 | 1.117540  | -0.159625 |                                      |           |           |           |
| H                 | -1.749685 | -0.932831 | -1.502553 |                                      |           |           |           |
| H                 | 2.216949  | -1.117540 | 0.159624  |                                      |           |           |           |
| H                 | 1.749685  | 0.932832  | 1.502553  |                                      |           |           |           |
|                   |           |           |           | 13                                   |           |           |           |
|                   |           |           |           | [HQ] <sup>-</sup>                    |           |           |           |
|                   |           |           |           | C                                    | -1.231894 | 0.649503  | -0.066641 |
|                   |           |           |           | C                                    | -0.989573 | -0.491610 | -0.821995 |
|                   |           |           |           | C                                    | 0.265266  | -1.203040 | -0.792039 |
|                   |           |           |           | C                                    | 1.230995  | -0.604113 | 0.100893  |
|                   |           |           |           | C                                    | 0.976990  | 0.535272  | 0.850261  |
|                   |           |           |           | C                                    | -0.257608 | 1.177946  | 0.776827  |
|                   |           |           |           | O                                    | -0.471418 | 2.325826  | 1.549283  |
|                   |           |           |           | O                                    | 0.496446  | -2.240532 | -1.474178 |
|                   |           |           |           | H                                    | -2.204299 | 1.146472  | -0.131739 |
|                   |           |           |           | H                                    | -1.764578 | -0.887853 | -1.474380 |
|                   |           |           |           | H                                    | 2.199946  | -1.094313 | 0.169162  |
|                   |           |           |           | H                                    | 1.736692  | 0.950667  | 1.510885  |
|                   |           |           |           | H                                    | -1.373593 | 2.606137  | 1.366941  |
|                   |           |           |           | 26                                   |           |           |           |
|                   |           |           |           | [SiPhH <sub>2</sub> -Q] <sup>+</sup> |           |           |           |
|                   |           |           |           | C                                    | 1.971548  | -0.547860 | 1.578338  |
|                   |           |           |           | C                                    | 3.023320  | -1.316192 | 1.903653  |
|                   |           |           |           | C                                    | 3.399140  | -2.502239 | 1.073648  |
|                   |           |           |           | C                                    | 2.565964  | -2.801825 | -0.126899 |
|                   |           |           |           | C                                    | 1.517360  | -2.026933 | -0.442020 |
|                   |           |           |           | C                                    | 1.188445  | -0.881617 | 0.395781  |
|                   |           |           |           | O                                    | 0.185981  | -0.193637 | 0.039700  |
|                   |           |           |           | O                                    | 4.346731  | -3.189380 | 1.372017  |
|                   |           |           |           | Si                                   | -0.586539 | 1.276166  | 0.740738  |
|                   |           |           |           | C                                    | -1.994777 | 1.677543  | -0.346020 |
|                   |           |           |           | C                                    | -3.264912 | 1.134095  | -0.090770 |
|                   |           |           |           | C                                    | -4.334933 | 1.435545  | -0.924423 |
|                   |           |           |           | C                                    | -4.147065 | 2.284226  | -2.013986 |
|                   |           |           |           | C                                    | -2.894075 | 2.836556  | -2.274074 |
|                   |           |           |           | C                                    | -1.821237 | 2.537844  | -1.443059 |
|                   |           |           |           | H                                    | 1.686831  | 0.315685  | 2.170813  |
|                   |           |           |           | H                                    | 3.646760  | -1.121636 | 2.771241  |
|                   |           |           |           | H                                    | 2.857167  | -3.667107 | -0.714256 |
|                   |           |           |           | H                                    | 0.880220  | -2.200448 | -1.302391 |
|                   |           |           |           | H                                    | -0.932567 | 0.807102  | 2.094030  |
|                   |           |           |           | H                                    | 0.533847  | 2.232974  | 0.720458  |
|                   |           |           |           | H                                    | -3.423047 | 0.480528  | 0.763378  |
|                   |           |           |           | H                                    | -5.314530 | 1.016409  | -0.722985 |
|                   |           |           |           | H                                    | -4.984806 | 2.522526  | -2.660971 |
|                   |           |           |           | H                                    | -2.757194 | 3.503019  | -3.118439 |
|                   |           |           |           | H                                    | -0.850229 | 2.982194  | -1.646579 |
|                   |           |           |           | 26                                   |           |           |           |
| 12                |           |           |           |                                      |           |           |           |
| [Q] <sup>2-</sup> |           |           |           |                                      |           |           |           |
| C                 | -1.220339 | 0.626678  | -0.079072 |                                      |           |           |           |
| C                 | -0.957779 | -0.525246 | -0.833654 |                                      |           |           |           |
| C                 | 0.282941  | -1.241249 | -0.813145 |                                      |           |           |           |
| C                 | 1.220342  | -0.626673 | 0.079065  |                                      |           |           |           |
| C                 | 0.957783  | 0.525252  | 0.833647  |                                      |           |           |           |
| C                 | -0.282936 | 1.241256  | 0.813135  |                                      |           |           |           |
| O                 | -0.525767 | 2.307389  | 1.511101  |                                      |           |           |           |
| O                 | 0.525752  | -2.307413 | -1.511070 |                                      |           |           |           |
| H                 | -2.201131 | 1.109496  | -0.158439 |                                      |           |           |           |
| H                 | -1.737161 | -0.926103 | -1.491866 |                                      |           |           |           |
| H                 | 2.201133  | -1.109492 | 0.158435  |                                      |           |           |           |
| H                 | 1.737163  | 0.926105  | 1.491862  |                                      |           |           |           |
| 13                |           |           |           |                                      |           |           |           |
| [HQ] <sup>+</sup> |           |           |           |                                      |           |           |           |
| C                 | -1.310352 | 0.635392  | -0.110930 |                                      |           |           |           |
| C                 | -1.066759 | -0.468331 | -0.839422 |                                      |           |           |           |
| C                 | 0.259630  | -1.157980 | -0.762395 |                                      |           |           |           |
| C                 | 1.295760  | -0.582523 | 0.146445  |                                      |           |           |           |
| C                 | 1.036886  | 0.521600  | 0.868235  |                                      |           |           |           |
| C                 | -0.263406 | 1.141101  | 0.748893  |                                      |           |           |           |
| O                 | -0.435428 | 2.192930  | 1.469058  |                                      |           |           |           |
| O                 | 0.476919  | -2.149374 | -1.415534 |                                      |           |           |           |
| H                 | -2.263231 | 1.156527  | -0.147220 |                                      |           |           |           |
| H                 | -1.802416 | -0.907581 | -1.507080 |                                      |           |           |           |
| H                 | 2.248955  | -1.101488 | 0.185141  |                                      |           |           |           |
| H                 | 1.750238  | 0.982776  | 1.542958  |                                      |           |           |           |
| H                 | -1.313424 | 2.607313  | 1.385132  |                                      |           |           |           |
| 13                |           |           |           |                                      |           |           |           |
| [HQ] <sup>-</sup> |           |           |           |                                      |           |           |           |
| C                 | -1.265625 | 0.642619  | -0.085838 |                                      |           |           |           |
| C                 | -1.020489 | -0.482102 | -0.828734 |                                      |           |           |           |
| C                 | 0.258181  | -1.165764 | -0.767412 |                                      |           |           |           |
| C                 | 1.256087  | -0.593811 | 0.120022  |                                      |           |           |           |
| C                 | 0.999982  | 0.528768  | 0.856405  |                                      |           |           |           |
| C                 | -0.261804 | 1.157563  | 0.761142  |                                      |           |           |           |
| O                 | -0.450329 | 2.258153  | 1.511150  |                                      |           |           |           |
| O                 | 0.485718  | -2.189858 | -1.441961 |                                      |           |           |           |
| H                 | -2.227688 | 1.147288  | -0.139544 |                                      |           |           |           |



|                                     |           |           |           |                                                                    |           |           |           |
|-------------------------------------|-----------|-----------|-----------|--------------------------------------------------------------------|-----------|-----------|-----------|
| O                                   | 0.163469  | -0.668021 | -0.684230 | H                                                                  | -0.674761 | -0.265129 | 2.159068  |
| O                                   | 4.701194  | -2.751298 | 1.439311  | H                                                                  | 1.030460  | 1.645308  | 0.397292  |
| Si                                  | -1.041216 | 0.359544  | -0.047312 | H                                                                  | -0.450902 | 2.595252  | 0.329031  |
| C                                   | -1.866394 | -0.487140 | 1.409779  | H                                                                  | -2.843416 | 1.288093  | -1.256553 |
| C                                   | -0.277734 | 2.014779  | 0.419779  | H                                                                  | -1.857364 | 0.488603  | -2.469903 |
| C                                   | -2.222823 | 0.535141  | -1.487205 | H                                                                  | -4.007067 | -0.788158 | -2.178369 |
| C                                   | -2.888611 | -0.790790 | -1.878197 | H                                                                  | -3.681616 | -0.960569 | -0.450418 |
| C                                   | 0.873607  | 2.424013  | -0.510397 | H                                                                  | -2.640346 | -1.767197 | -1.622093 |
| C                                   | -3.107666 | 0.288404  | 1.877205  | H                                                                  | 1.153952  | 3.219305  | -1.555732 |
| H                                   | 1.182811  | 0.026193  | 1.700357  | H                                                                  | -0.367148 | 2.581475  | -2.189879 |
| H                                   | 3.265622  | -0.952640 | 2.644462  | H                                                                  | 1.067050  | 1.555184  | -2.145118 |
| H                                   | 3.714193  | -3.411829 | -0.878891 | H                                                                  | -2.941593 | 0.557823  | 2.951770  |
| H                                   | 1.606873  | -2.417469 | -1.816845 | H                                                                  | -2.135356 | 1.824089  | 2.027269  |
| H                                   | -2.144330 | -1.505729 | 1.114381  | H                                                                  | -3.417354 | 0.871916  | 1.280830  |
| H                                   | -1.154251 | -0.594961 | 2.235945  |                                                                    |           |           |           |
| H                                   | 0.060970  | 2.003890  | 1.462745  |                                                                    |           |           |           |
| H                                   | -1.078068 | 2.765016  | 0.377345  | 91                                                                 |           |           |           |
| H                                   | -2.982423 | 1.285009  | -1.232943 | [Si(C <sub>6</sub> Me <sub>5</sub> ) <sub>3</sub> -Q] <sup>+</sup> |           |           |           |
| H                                   | -1.665832 | 0.944963  | -2.338361 | C                                                                  | 1.28284   | 2.16784   | 1.75112   |
| H                                   | -3.540468 | -0.674365 | -2.747925 | C                                                                  | 1.60007   | 3.32105   | 2.35835   |
| H                                   | -3.499794 | -1.183348 | -1.058978 | C                                                                  | 0.88903   | 3.77461   | 3.58888   |
| H                                   | -2.137619 | -1.547665 | -2.121602 | C                                                                  | -0.16543  | 2.87969   | 4.14799   |
| H                                   | 1.258895  | 3.415399  | -0.259003 | C                                                                  | -0.46844  | 1.72253   | 3.54431   |
| H                                   | 0.550138  | 2.450104  | -1.555485 | C                                                                  | 0.21506   | 1.33920   | 2.30994   |
| H                                   | 1.704820  | 1.715800  | -0.444103 | O                                                                  | -0.15686  | 0.25823   | 1.78539   |
| H                                   | -3.584826 | -0.192987 | 2.734518  | O                                                                  | 1.16470   | 4.82650   | 4.11852   |
| H                                   | -2.852656 | 1.310568  | 2.176185  | Si                                                                 | -0.02098  | -0.43180  | 0.07719   |
| H                                   | -3.855891 | 0.356699  | 1.080741  | C                                                                  | -1.64977  | -1.37690  | 0.03424   |
|                                     |           |           |           | C                                                                  | -0.05323  | 1.21228   | -0.86161  |
|                                     |           |           |           | C                                                                  | 1.56430   | -1.45113  | 0.01716   |
| 34                                  |           |           |           | C                                                                  | -2.60085  | -1.22294  | -1.00383  |
| [SiEt <sub>3</sub> -Q] <sup>-</sup> |           |           |           | C                                                                  | -3.87451  | -1.80048  | -0.87246  |
| C                                   | 1.047020  | -2.413445 | 0.915105  | C                                                                  | -4.19671  | -2.56094  | 0.26282   |
| C                                   | 2.118349  | -2.799461 | 1.704217  | C                                                                  | 0.97044   | 1.62115   | -1.75330  |
| C                                   | 3.435011  | -2.209497 | 1.593274  | C                                                                  | 0.75928   | 2.71183   | -2.61562  |
| C                                   | 3.518558  | -1.187798 | 0.572370  | C                                                                  | -0.40637  | 3.48251   | -2.50761  |
| C                                   | 2.438953  | -0.810208 | -0.210158 | C                                                                  | 1.80522   | -2.06066  | -1.23680  |
| C                                   | 1.189531  | -1.411329 | -0.046466 | C                                                                  | 3.05802   | -2.61682  | -1.53345  |
| O                                   | 0.092110  | -1.024010 | -0.848611 | C                                                                  | 4.06505   | -2.62803  | -0.55751  |
| O                                   | 4.410352  | -2.553054 | 2.310912  | C                                                                  | -3.26031  | -2.71719  | 1.29442   |
| Si                                  | -0.841322 | 0.213255  | -0.250709 | C                                                                  | -1.97621  | -2.16827  | 1.16019   |
| C                                   | -1.516696 | -0.194023 | 1.461502  | C                                                                  | 3.84009   | -2.02537  | 0.69034   |
| C                                   | 0.129772  | 1.828488  | -0.200730 | C                                                                  | 2.58375   | -1.47594  | 1.00030   |
| C                                   | -2.279406 | 0.368702  | -1.464492 | C                                                                  | -1.40515  | 3.12105   | -1.59006  |
| C                                   | -3.207503 | -0.851244 | -1.432117 | C                                                                  | -1.23377  | 1.99822   | -0.76369  |
| C                                   | 0.518871  | 2.328156  | -1.597262 | C                                                                  | -5.54035  | -3.24706  | 0.35049   |
| C                                   | -2.557821 | 0.815807  | 1.959196  | C                                                                  | -3.63515  | -3.47953  | 2.54610   |
| H                                   | 0.072971  | -2.890059 | 1.027201  | C                                                                  | -0.94932  | -2.50407  | 2.22128   |
| H                                   | 1.994975  | -3.582261 | 2.449001  | C                                                                  | -4.91065  | -1.61187  | -1.95814  |
| H                                   | 4.487064  | -0.713088 | 0.433683  | C                                                                  | -2.30561  | -0.51157  | -2.31020  |
| H                                   | 2.550237  | -0.041081 | -0.975211 | C                                                                  | 2.38274   | -0.99647  | 2.42568   |
| H                                   | -1.952879 | -1.200258 | 1.423475  | C                                                                  | 4.96882   | -1.95864  | 1.69686   |

|   |          |          |          |                                                                    |          |          |          |
|---|----------|----------|----------|--------------------------------------------------------------------|----------|----------|----------|
| C | 5.37908  | -3.32250 | -0.83357 | H                                                                  | -2.15894 | 0.92987  | 0.93720  |
| C | 3.33322  | -3.16689 | -2.91553 | H                                                                  | -3.27989 | 1.43830  | -0.28947 |
| C | -2.67518 | 3.93966  | -1.51299 | H                                                                  | -2.57922 | 2.63647  | 0.79031  |
| C | -0.56897 | 4.72934  | -3.34633 | H                                                                  | -0.26845 | -2.17181 | -1.86804 |
| C | 1.79360  | 3.06081  | -3.66370 | H                                                                  | 0.76674  | -1.24247 | -2.97104 |
| C | 2.35883  | 1.00757  | -1.77080 | H                                                                  | 0.83695  | -3.00164 | -2.92350 |
| C | -2.35626 | 1.72518  | 0.22460  |                                                                    |          |          |          |
| C | 0.73048  | -2.11264 | -2.30126 | 91                                                                 |          |          |          |
| H | 1.79196  | 1.81861  | 0.86044  | [Si(C <sub>6</sub> Me <sub>5</sub> ) <sub>3</sub> -Q] <sup>+</sup> |          |          |          |
| H | 2.38707  | 3.97416  | 1.99490  | C                                                                  | 1.39520  | 2.14575  | 1.83472  |
| H | -0.65948 | 3.22127  | 5.05204  | C                                                                  | 1.74744  | 3.33812  | 2.40740  |
| H | -1.23114 | 1.04045  | 3.90489  | C                                                                  | 0.98847  | 3.91170  | 3.50456  |
| H | -6.30450 | -2.58564 | 0.77635  | C                                                                  | -0.15828 | 3.14828  | 3.96462  |
| H | -5.49409 | -4.14071 | 0.97244  | C                                                                  | -0.49829 | 1.95705  | 3.38600  |
| H | -5.88970 | -3.55812 | -0.63469 | C                                                                  | 0.26394  | 1.43998  | 2.31080  |
| H | -3.06006 | -3.14458 | 3.40980  | O                                                                  | -0.11666 | 0.25707  | 1.81074  |
| H | -3.46513 | -4.55722 | 2.43511  | O                                                                  | 1.30692  | 4.99939  | 4.02523  |
| H | -4.68891 | -3.33833 | 2.79006  | Si                                                                 | -0.01537 | -0.34588 | 0.21120  |
| H | -1.03656 | -1.86858 | 3.11107  | C                                                                  | -1.63755 | -1.34820 | 0.10634  |
| H | 0.06857  | -2.42459 | 1.83817  | C                                                                  | -0.05285 | 1.23943  | -0.84433 |
| H | -1.06730 | -3.53827 | 2.55001  | C                                                                  | 1.54224  | -1.43244 | 0.01942  |
| H | -5.91840 | -1.58697 | -1.54188 | C                                                                  | -2.60378 | -1.21920 | -0.91948 |
| H | -4.87878 | -2.42729 | -2.69108 | C                                                                  | -3.85948 | -1.83945 | -0.79043 |
| H | -4.76548 | -0.67992 | -2.50402 | C                                                                  | -4.15354 | -2.62163 | 0.33472  |
| H | -1.26112 | -0.24222 | -2.43630 | C                                                                  | 0.95494  | 1.62299  | -1.75925 |
| H | -2.58202 | -1.15624 | -3.15028 | C                                                                  | 0.72919  | 2.67737  | -2.66309 |
| H | -2.88228 | 0.41492  | -2.41286 | C                                                                  | -0.44323 | 3.43872  | -2.58172 |
| H | 1.34989  | -1.08690 | 2.75161  | C                                                                  | 1.73772  | -2.04108 | -1.24364 |
| H | 2.70876  | 0.04197  | 2.57623  | C                                                                  | 2.95389  | -2.65597 | -1.57178 |
| H | 2.97156  | -1.60590 | 3.11189  | C                                                                  | 3.97403  | -2.73996 | -0.61327 |
| H | 4.97706  | -2.82894 | 2.36430  | C                                                                  | -3.20636 | -2.75421 | 1.35805  |
| H | 4.90089  | -1.06653 | 2.32049  | C                                                                  | -1.94102 | -2.16103 | 1.22342  |
| H | 5.93666  | -1.92130 | 1.19689  | C                                                                  | 3.79864  | -2.14536 | 0.64275  |
| H | 5.81110  | -3.73115 | 0.08009  | C                                                                  | 2.57998  | -1.52389 | 0.97851  |
| H | 6.11643  | -2.63958 | -1.27218 | C                                                                  | -1.42423 | 3.10930  | -1.63540 |
| H | 5.24798  | -4.15486 | -1.52498 | C                                                                  | -1.22948 | 2.02733  | -0.76182 |
| H | 3.00864  | -4.20950 | -3.01429 | C                                                                  | -5.47396 | -3.35528 | 0.42169  |
| H | 4.39576  | -3.12849 | -3.15375 | C                                                                  | -3.55113 | -3.52728 | 2.61299  |
| H | 2.81520  | -2.58866 | -3.68267 | C                                                                  | -0.90882 | -2.46527 | 2.29029  |
| H | -2.59225 | 4.74837  | -0.77630 | C                                                                  | -4.90557 | -1.66205 | -1.86984 |
| H | -3.53592 | 3.33334  | -1.23156 | C                                                                  | -2.35002 | -0.48194 | -2.22084 |
| H | -2.90935 | 4.39765  | -2.47383 | C                                                                  | 2.45419  | -1.02309 | 2.40494  |
| H | -1.11049 | 5.50390  | -2.80211 | C                                                                  | 4.93808  | -2.15712 | 1.63972  |
| H | -1.12596 | 4.52441  | -4.26833 | C                                                                  | 5.24473  | -3.50262 | -0.91952 |
| H | 0.39496  | 5.15010  | -3.63093 | C                                                                  | 3.18216  | -3.18522 | -2.97194 |
| H | 2.51235  | 3.80747  | -3.30434 | C                                                                  | -2.70139 | 3.91731  | -1.56394 |
| H | 1.31888  | 3.46832  | -4.55688 | C                                                                  | -0.62740 | 4.64933  | -3.47038 |
| H | 2.36014  | 2.18363  | -3.97627 | C                                                                  | 1.76152  | 2.99657  | -3.72366 |
| H | 3.10170  | 1.79077  | -1.93673 | C                                                                  | 2.34799  | 1.02120  | -1.75966 |
| H | 2.49343  | 0.26869  | -2.56937 | C                                                                  | -2.32255 | 1.78933  | 0.26526  |
| H | 2.61768  | 0.50939  | -0.83825 | C                                                                  | 0.64436  | -2.02440 | -2.28880 |



|   |          |          |          |                                                        |          |          |          |
|---|----------|----------|----------|--------------------------------------------------------|----------|----------|----------|
| H | 1.97313  | 1.72573  | 1.01672  | [Si(C <sub>6</sub> Me <sub>5</sub> ) <sub>3</sub> -Q]- |          |          |          |
| H | 2.60983  | 3.89924  | 2.06374  | C                                                      | 1.71942  | 1.96575  | 1.88845  |
| H | -0.72955 | 3.56785  | 4.78584  | C                                                      | 2.23217  | 3.14641  | 2.40062  |
| H | -1.35422 | 1.37821  | 3.71877  | C                                                      | 1.54933  | 3.93427  | 3.40375  |
| H | -6.26062 | -2.73116 | 0.86346  | C                                                      | 0.28359  | 3.36463  | 3.81324  |
| H | -5.39016 | -4.25702 | 1.02889  | C                                                      | -0.21815 | 2.18341  | 3.29303  |
| H | -5.81919 | -3.66534 | -0.56581 | C                                                      | 0.48896  | 1.47151  | 2.32432  |
| H | -3.01304 | -3.13915 | 3.47864  | O                                                      | -0.05329 | 0.26095  | 1.85539  |
| H | -3.30375 | -4.59259 | 2.52384  | O                                                      | 2.01064  | 5.00613  | 3.87399  |
| H | -4.61575 | -3.45549 | 2.84047  | Si                                                     | -0.04091 | -0.28723 | 0.29236  |
| H | -1.00206 | -1.80425 | 3.15894  | C                                                      | -1.75557 | -1.16689 | 0.17134  |
| H | 0.10702  | -2.37029 | 1.90722  | C                                                      | 0.05677  | 1.25475  | -0.83208 |
| H | -1.01196 | -3.49558 | 2.63727  | C                                                      | 1.37416  | -1.56523 | 0.00435  |
| H | -5.91449 | -1.71670 | -1.45893 | C                                                      | -2.73323 | -0.95019 | -0.82794 |
| H | -4.82425 | -2.43314 | -2.64660 | C                                                      | -4.03359 | -1.46961 | -0.68260 |
| H | -4.81366 | -0.69547 | -2.36596 | C                                                      | -4.36889 | -2.24153 | 0.43613  |
| H | -1.31868 | -0.17133 | -2.34899 | C                                                      | 1.06557  | 1.50923  | -1.78635 |
| H | -2.61249 | -1.12545 | -3.06743 | C                                                      | 0.91198  | 2.54523  | -2.72657 |
| H | -2.96121 | 0.42453  | -2.30398 | C                                                      | -0.17928 | 3.41759  | -2.64341 |
| H | 1.42288  | -0.90992 | 2.72007  | C                                                      | 1.46705  | -2.19004 | -1.26246 |
| H | 2.95319  | -0.05689 | 2.54791  | C                                                      | 2.58301  | -2.96040 | -1.61794 |
| H | 2.92789  | -1.73001 | 3.09007  | C                                                      | 3.59803  | -3.19198 | -0.67871 |
| H | 4.88681  | -3.02162 | 2.31364  | C                                                      | -3.41418 | -2.46034 | 1.43709  |
| H | 4.93311  | -1.26126 | 2.26155  | C                                                      | -2.10794 | -1.96749 | 1.28438  |
| H | 5.90448  | -2.19051 | 1.13569  | C                                                      | 3.52418  | -2.58913 | 0.58171  |
| H | 5.66133  | -3.95353 | -0.01809 | C                                                      | 2.41039  | -1.80167 | 0.94063  |
| H | 6.01830  | -2.85670 | -1.35273 | C                                                      | -1.14677 | 3.22542  | -1.64734 |
| H | 5.05958  | -4.31337 | -1.62499 | C                                                      | -1.02707 | 2.16174  | -0.73955 |
| H | 2.77459  | -4.19460 | -3.10682 | C                                                      | -5.74180 | -2.87157 | 0.54268  |
| H | 4.24395  | -3.22307 | -3.21547 | C                                                      | -3.79675 | -3.20873 | 2.69705  |
| H | 2.70952  | -2.54147 | -3.71663 | C                                                      | -1.08948 | -2.35576 | 2.33757  |
| H | -2.62951 | 4.72201  | -0.82157 | C                                                      | -5.08126 | -1.18192 | -1.73755 |
| H | -3.55379 | 3.29737  | -1.28279 | C                                                      | -2.45326 | -0.21458 | -2.12527 |
| H | -2.94049 | 4.37518  | -2.52407 | C                                                      | 2.39120  | -1.27880 | 2.36365  |
| H | -1.15171 | 5.44743  | -2.94253 | C                                                      | 4.66233  | -2.76545 | 1.56478  |
| H | -1.20977 | 4.41176  | -4.36910 | C                                                      | 4.74878  | -4.11855 | -1.01203 |
| H | 0.32929  | 5.05748  | -3.79606 | C                                                      | 2.71762  | -3.49583 | -3.02906 |
| H | 2.47412  | 3.76181  | -3.39086 | C                                                      | -2.32667 | 4.16674  | -1.54506 |
| H | 1.28669  | 3.36529  | -4.63424 | C                                                      | -0.28184 | 4.60815  | -3.57314 |
| H | 2.33779  | 2.11273  | -3.99906 | C                                                      | 1.94341  | 2.72595  | -3.82107 |
| H | 3.08602  | 1.81162  | -1.91818 | C                                                      | 2.39918  | 0.78636  | -1.78561 |
| H | 2.49923  | 0.27751  | -2.55172 | C                                                      | -2.08493 | 2.06540  | 0.34253  |
| H | 2.59502  | 0.53325  | -0.81986 | C                                                      | 0.36619  | -2.02082 | -2.28585 |
| H | -2.07353 | 1.04712  | 1.01749  | H                                                      | 2.27903  | 1.41132  | 1.13237  |
| H | -3.25509 | 1.45826  | -0.20656 | H                                                      | 3.18982  | 3.52247  | 2.04957  |
| H | -2.53879 | 2.72512  | 0.79094  | H                                                      | -0.27670 | 3.91036  | 4.56867  |
| H | -0.34061 | -2.09515 | -1.82950 | H                                                      | -1.17515 | 1.78532  | 3.62948  |
| H | 0.67199  | -1.11215 | -2.90039 | H                                                      | -6.46854 | -2.20191 | 1.02023  |
| H | 0.72698  | -2.87408 | -2.96719 | H                                                      | -5.71207 | -3.79219 | 1.12738  |
|   |          |          |          | H                                                      | -6.13562 | -3.13154 | -0.44165 |
|   |          |          |          | H                                                      | -3.23476 | -2.84073 | 3.55656  |

|   |          |          |          |   |           |           |           |
|---|----------|----------|----------|---|-----------|-----------|-----------|
| H | -3.60371 | -4.28666 | 2.61779  | B | -0.267148 | 0.119197  | -0.378508 |
| H | -4.85554 | -3.08033 | 2.92864  | C | 0.133489  | 1.401251  | 0.537950  |
| H | -1.09546 | -1.66333 | 3.18533  | C | -1.321834 | -0.943529 | 0.256585  |
| H | -0.07763 | -2.36119 | 1.93405  | C | -0.642866 | 0.689580  | -1.847066 |
| H | -1.28601 | -3.36509 | 2.70744  | C | -0.907764 | 2.239692  | 0.930932  |
| H | -6.08798 | -1.19833 | -1.31721 | C | -0.719688 | 3.432856  | 1.608712  |
| H | -5.05327 | -1.91308 | -2.55648 | C | 0.574877  | 3.842151  | 1.907893  |
| H | -4.93678 | -0.19705 | -2.18405 | C | 1.645614  | 3.049859  | 1.526491  |
| H | -1.40183 | 0.00168  | -2.27839 | C | 1.407025  | 1.860223  | 0.845974  |
| H | -2.80133 | -0.81339 | -2.97485 | C | -1.797278 | -0.944237 | 1.563106  |
| H | -2.97755 | 0.74764  | -2.17059 | C | -2.694838 | -1.885965 | 2.053550  |
| H | 1.41134  | -0.92961 | 2.66911  | C | -3.150622 | -2.890733 | 1.214506  |
| H | 3.07804  | -0.43496 | 2.49456  | C | -2.693224 | -2.945791 | -0.095843 |
| H | 2.70757  | -2.06873 | 3.05200  | C | -1.795567 | -1.986369 | -0.538706 |
| H | 4.48899  | -3.60603 | 2.24945  | C | 0.358416  | 1.291344  | -2.605210 |
| H | 4.79317  | -1.87394 | 2.17884  | C | 0.140705  | 1.859936  | -3.851422 |
| H | 5.60863  | -2.94659 | 1.05275  | C | -1.144174 | 1.855697  | -4.376989 |
| H | 5.10901  | -4.63547 | -0.12117 | C | -2.178880 | 1.287508  | -3.648915 |
| H | 5.60161  | -3.58181 | -1.44687 | C | -1.915513 | 0.723891  | -2.405459 |
| H | 4.44613  | -4.88687 | -1.72534 | F | -2.166105 | 1.880386  | 0.646556  |
| H | 2.16654  | -4.43321 | -3.17840 | F | -1.753598 | 4.188054  | 1.968237  |
| H | 3.76072  | -3.68225 | -3.28730 | F | 0.782149  | 4.982220  | 2.557031  |
| H | 2.33570  | -2.77662 | -3.75714 | F | 2.890833  | 3.428931  | 1.807197  |
| H | -2.14403 | 4.95708  | -0.80638 | F | 2.501644  | 1.147984  | 0.509248  |
| H | -3.22955 | 3.63986  | -1.23037 | F | -1.358629 | -0.037502 | 2.454186  |
| H | -2.54737 | 4.64684  | -2.49961 | F | 1.610736  | 1.348109  | -2.121195 |
| H | -0.65858 | 5.48458  | -3.04207 | F | 1.140510  | 2.412389  | -4.536615 |
| H | -0.96063 | 4.41868  | -4.41469 | F | -1.381095 | 2.396014  | -5.567721 |
| H | 0.68875  | 4.88162  | -3.98720 | F | -3.414281 | 1.286740  | -4.144814 |
| H | 2.72558  | 3.44219  | -3.53807 | F | -2.963747 | 0.202785  | -1.758482 |
| H | 1.48255  | 3.08968  | -4.74184 | F | -1.379670 | -2.089004 | -1.806976 |
| H | 2.43814  | 1.78380  | -4.06096 | F | -3.113168 | -3.914401 | -0.905367 |
| H | 3.20138  | 1.50723  | -1.96544 | F | -4.003206 | -3.803482 | 1.664064  |
| H | 2.47903  | 0.01085  | -2.55846 | F | -3.103642 | -1.837246 | 3.319327  |
| H | 2.60582  | 0.31059  | -0.83094 | O | 4.188164  | -3.486201 | 2.608405  |
| H | -1.85657 | 1.32796  | 1.10591  | H | 0.755280  | -0.677720 | 2.005044  |
| H | -3.07062 | 1.82146  | -0.07465 | H | 2.253866  | -2.006793 | 3.496297  |
| H | -2.16589 | 3.02846  | 0.85597  | H | 4.498952  | -3.440856 | 0.024680  |
| H | -0.60860 | -1.99158 | -1.80219 | H | 2.966658  | -2.107128 | -1.481436 |
| H | 0.48366  | -1.09603 | -2.86701 |   |           |           |           |
| H | 0.33841  | -2.85268 | -2.99118 |   |           |           |           |

46

B(C<sub>6</sub>F<sub>5</sub>)<sub>3</sub>-Q

|   |          |           |           |
|---|----------|-----------|-----------|
| C | 1.554664 | -1.299016 | 1.616872  |
| C | 2.361157 | -2.008203 | 2.416387  |
| C | 3.473043 | -2.840698 | 1.873983  |
| C | 3.674084 | -2.843020 | 0.397915  |
| C | 2.866390 | -2.139373 | -0.402121 |
| C | 1.760380 | -1.355945 | 0.163065  |
| O | 1.029303 | -0.772447 | -0.659151 |

46

[B(C<sub>6</sub>F<sub>5</sub>)<sub>3</sub>-Q]<sup>-</sup>

|   |           |           |           |
|---|-----------|-----------|-----------|
| C | 1.598324  | -1.339278 | 1.590827  |
| C | 2.366843  | -2.112897 | 2.417697  |
| C | 3.387672  | -3.013394 | 1.914769  |
| C | 3.551537  | -3.036839 | 0.471771  |
| C | 2.783246  | -2.263355 | -0.347844 |
| C | 1.780895  | -1.400368 | 0.180750  |
| O | 1.089670  | -0.699773 | -0.692409 |
| B | -0.133888 | 0.101265  | -0.393029 |
| C | 0.161881  | 1.437293  | 0.519506  |

|   |           |           |           |   |           |           |           |
|---|-----------|-----------|-----------|---|-----------|-----------|-----------|
| C | -1.240602 | -0.935091 | 0.250719  | C | -0.954931 | 2.295380  | 0.852672  |
| C | -0.598423 | 0.719565  | -1.846766 | C | -0.895564 | 3.518841  | 1.501586  |
| C | -0.911429 | 2.245960  | 0.883272  | C | 0.346737  | 4.039582  | 1.833481  |
| C | -0.780388 | 3.454234  | 1.547911  | C | 1.488340  | 3.326534  | 1.510659  |
| C | 0.492083  | 3.914261  | 1.860405  | C | 1.381527  | 2.097614  | 0.858907  |
| C | 1.594633  | 3.157521  | 1.502530  | C | -1.611706 | -0.917994 | 1.559416  |
| C | 1.415193  | 1.947311  | 0.835318  | C | -2.456332 | -1.903511 | 2.061840  |
| C | -1.734161 | -0.932713 | 1.548381  | C | -2.839637 | -2.952212 | 1.245964  |
| C | -2.618148 | -1.887720 | 2.040613  | C | -2.373294 | -2.997020 | -0.059025 |
| C | -3.043167 | -2.911664 | 1.212102  | C | -1.532023 | -1.992259 | -0.512791 |
| C | -2.573276 | -2.966907 | -0.092260 | C | 0.368157  | 1.501076  | -2.612845 |
| C | -1.690386 | -1.993693 | -0.535514 | C | 0.064284  | 2.083424  | -3.837964 |
| C | 0.360865  | 1.370327  | -2.620878 | C | -1.221532 | 1.976053  | -4.343902 |
| C | 0.088862  | 1.960331  | -3.848324 | C | -2.177060 | 1.295744  | -3.610049 |
| C | -1.206516 | 1.931423  | -4.342193 | C | -1.829930 | 0.727062  | -2.387441 |
| C | -2.200784 | 1.319199  | -3.597435 | F | -2.184013 | 1.846414  | 0.533754  |
| C | -1.884434 | 0.737774  | -2.373602 | F | -2.007872 | 4.210780  | 1.802891  |
| F | -2.158947 | 1.850424  | 0.581530  | F | 0.438449  | 5.225893  | 2.456583  |
| F | -1.850610 | 4.183533  | 1.880961  | F | 2.688726  | 3.839416  | 1.822719  |
| F | 0.648311  | 5.078025  | 2.497607  | F | 2.535002  | 1.496224  | 0.573856  |
| F | 2.822122  | 3.600545  | 1.792698  | F | -1.285774 | 0.048788  | 2.436295  |
| F | 2.535858  | 1.290161  | 0.514771  | F | 1.614184  | 1.704692  | -2.171109 |
| F | -1.345245 | -0.000667 | 2.437095  | F | 0.989597  | 2.765193  | -4.532272 |
| F | 1.620974  | 1.480283  | -2.179749 | F | -1.538018 | 2.534283  | -5.523279 |
| F | 1.052382  | 2.567190  | -4.549959 | F | -3.429615 | 1.198893  | -4.085936 |
| F | -1.493429 | 2.495426  | -5.518884 | F | -2.836568 | 0.109913  | -1.748153 |
| F | -3.455122 | 1.296130  | -4.061174 | F | -1.145953 | -2.084505 | -1.794102 |
| F | -2.913526 | 0.182119  | -1.718351 | F | -2.754544 | -4.002612 | -0.862547 |
| F | -1.286378 | -2.095173 | -1.809199 | F | -3.661202 | -3.908136 | 1.706010  |
| F | -2.979059 | -3.950767 | -0.901154 | F | -2.904023 | -1.849886 | 3.326255  |
| F | -3.891452 | -3.838754 | 1.662927  | O | 3.835479  | -4.119253 | 2.662765  |
| F | -3.051728 | -1.831118 | 3.304004  | H | 1.149718  | -0.517793 | 2.029871  |
| O | 4.083653  | -3.720809 | 2.674729  | H | 2.335060  | -2.114106 | 3.487272  |
| H | 0.854442  | -0.666293 | 2.003199  | H | 3.835854  | -4.166198 | 0.028250  |
| H | 2.241625  | -2.075037 | 3.495314  | H | 2.618421  | -2.551726 | -1.427766 |
| H | 4.313917  | -3.700974 | 0.076575  |   |           |           |           |
| H | 2.897513  | -2.275880 | -1.427055 |   |           |           |           |

46

[B(C<sub>6</sub>F<sub>5</sub>)<sub>3</sub>-Q]<sup>2-</sup>

|   |           |           |           |
|---|-----------|-----------|-----------|
| C | 1.741194  | -1.316222 | 1.581409  |
| C | 2.408795  | -2.216929 | 2.405742  |
| C | 3.217690  | -3.302744 | 1.912726  |
| C | 3.247691  | -3.363846 | 0.472354  |
| C | 2.570422  | -2.466557 | -0.342503 |
| C | 1.807706  | -1.423374 | 0.188477  |
| O | 1.196520  | -0.550058 | -0.696421 |
| B | -0.021514 | 0.144512  | -0.395408 |
| C | 0.157553  | 1.529597  | 0.521716  |
| C | -1.124422 | -0.908779 | 0.260595  |
| C | -0.550176 | 0.780948  | -1.848352 |

46

B(C<sub>6</sub>F<sub>5</sub>)<sub>2</sub>Ph-Q

|   |           |           |           |
|---|-----------|-----------|-----------|
| C | 1.487592  | -1.463674 | 1.538039  |
| C | 2.240747  | -2.284282 | 2.279778  |
| C | 3.358734  | -3.072237 | 1.689225  |
| C | 3.629011  | -2.899034 | 0.234112  |
| C | 2.874540  | -2.082862 | -0.508520 |
| C | 1.753882  | -1.349262 | 0.097141  |
| O | 1.076102  | -0.650435 | -0.676241 |
| B | -0.265473 | 0.196426  | -0.370622 |
| C | 0.119938  | 1.475732  | 0.560162  |
| C | -1.278954 | -0.875284 | 0.280729  |
| C | -0.651618 | 0.730439  | -1.851192 |
| C | -0.907425 | 2.381238  | 0.825481  |
| C | -0.734545 | 3.554163  | 1.545659  |

|                                                                    |           |           |           |                                                                   |           |           |           |
|--------------------------------------------------------------------|-----------|-----------|-----------|-------------------------------------------------------------------|-----------|-----------|-----------|
| C                                                                  | 0.530331  | 3.874788  | 2.022065  | C                                                                 | 1.407690  | 1.968540  | 0.784299  |
| C                                                                  | 1.589055  | 3.017009  | 1.769388  | C                                                                 | -1.775451 | -0.998532 | 1.467611  |
| C                                                                  | 1.366981  | 1.851745  | 1.043518  | C                                                                 | -2.716470 | -1.931306 | 1.889624  |
| C                                                                  | -1.948291 | -0.677889 | 1.493126  | C                                                                 | -3.164975 | -2.893711 | 1.000641  |
| C                                                                  | -2.777605 | -1.658368 | 2.035871  | C                                                                 | -2.655594 | -2.912545 | -0.288521 |
| C                                                                  | -2.956411 | -2.867293 | 1.371795  | C                                                                 | -1.714482 | -1.961871 | -0.664454 |
| C                                                                  | -2.304091 | -3.086961 | 0.160117  | C                                                                 | 0.395406  | 1.012329  | -2.812239 |
| C                                                                  | -1.480412 | -2.101031 | -0.372047 | C                                                                 | 0.058753  | 1.589291  | -4.034257 |
| C                                                                  | 0.323267  | 1.339689  | -2.638146 | C                                                                 | -1.272071 | 1.875280  | -4.329292 |
| C                                                                  | 0.076618  | 1.856672  | -3.901070 | C                                                                 | -2.255620 | 1.578203  | -3.389536 |
| C                                                                  | -1.212523 | 1.791239  | -4.413399 | C                                                                 | -1.906957 | 1.001349  | -2.170305 |
| C                                                                  | -2.222714 | 1.218890  | -3.655559 | F                                                                 | -2.173758 | 1.776950  | 0.785959  |
| C                                                                  | -1.932397 | 0.707331  | -2.393957 | F                                                                 | -1.836555 | 4.062945  | 2.122093  |
| F                                                                  | -2.139285 | 2.123536  | 0.366433  | F                                                                 | 0.671000  | 5.024950  | 2.592432  |
| F                                                                  | -1.757271 | 4.373249  | 1.775630  | F                                                                 | 2.833402  | 3.636128  | 1.687986  |
| F                                                                  | 0.722350  | 4.992244  | 2.714822  | F                                                                 | 2.528699  | 1.367456  | 0.356581  |
| F                                                                  | 2.808343  | 3.313115  | 2.216003  | F                                                                 | -1.367814 | -0.133192 | 2.414006  |
| F                                                                  | 2.455182  | 1.081618  | 0.836103  | F                                                                 | -1.255156 | -2.059715 | -1.916842 |
| F                                                                  | 1.576325  | 1.457559  | -2.167785 | F                                                                 | -3.072916 | -3.846263 | -1.150528 |
| F                                                                  | 1.050685  | 2.419016  | -4.616528 | F                                                                 | -4.069243 | -3.799346 | 1.383477  |
| F                                                                  | -1.476450 | 2.281652  | -5.620911 | F                                                                 | -3.185202 | -1.914764 | 3.142207  |
| F                                                                  | -3.462795 | 1.167083  | -4.139409 | O                                                                 | 4.199393  | -3.535087 | 2.779937  |
| F                                                                  | -2.958881 | 0.193061  | -1.714113 | H                                                                 | 0.800771  | -0.692219 | 2.013468  |
| O                                                                  | 4.028380  | -3.820680 | 2.367583  | H                                                                 | 2.225919  | -2.019541 | 3.544683  |
| H                                                                  | 0.670486  | -0.884415 | 1.950246  | H                                                                 | 4.511707  | -3.484310 | 0.190616  |
| H                                                                  | 2.082890  | -2.411856 | 3.345655  | H                                                                 | 3.058000  | -2.142709 | -1.352582 |
| H                                                                  | 4.460192  | -3.466159 | -0.171729 | H                                                                 | 1.435628  | 0.787584  | -2.590059 |
| H                                                                  | 3.029045  | -1.919776 | -1.569556 | H                                                                 | 0.836042  | 1.815419  | -4.759898 |
| H                                                                  | -1.820851 | 0.256874  | 2.033629  | H                                                                 | -1.540051 | 2.323657  | -5.282038 |
| H                                                                  | -3.285583 | -1.475097 | 2.977789  | H                                                                 | -3.298332 | 1.793980  | -3.608051 |
| H                                                                  | -3.602242 | -3.632016 | 1.791453  | H                                                                 | -2.688280 | 0.776645  | -1.447715 |
| H                                                                  | -2.444167 | -4.023505 | -0.371098 |                                                                   |           |           |           |
| H                                                                  | -0.989288 | -2.281114 | -1.327473 |                                                                   |           |           |           |
|                                                                    |           |           |           | 46                                                                |           |           |           |
|                                                                    |           |           |           | [B(C <sub>6</sub> F <sub>5</sub> ) <sub>2</sub> -Q] <sup>2-</sup> |           |           |           |
| 46                                                                 |           |           |           | C                                                                 | 1.716219  | -1.276767 | 1.626365  |
| [B(C <sub>6</sub> F <sub>5</sub> ) <sub>2</sub> Ph-Q] <sup>-</sup> |           |           |           | C                                                                 | 2.464390  | -2.081765 | 2.482801  |
| C                                                                  | 1.601705  | -1.310129 | 1.623922  | C                                                                 | 3.448605  | -3.031509 | 2.033861  |
| C                                                                  | 2.390833  | -2.039615 | 2.471815  | C                                                                 | 3.570892  | -3.064096 | 0.597530  |
| C                                                                  | 3.484270  | -2.868644 | 2.000381  | C                                                                 | 2.817941  | -2.262703 | -0.249732 |
| C                                                                  | 3.696126  | -2.872217 | 0.563322  | C                                                                 | 1.875985  | -1.352051 | 0.239166  |
| C                                                                  | 2.908159  | -2.143147 | -0.277418 | O                                                                 | 1.197113  | -0.577871 | -0.681797 |
| C                                                                  | 1.835945  | -1.346000 | 0.220267  | B                                                                 | -0.039687 | 0.113695  | -0.426644 |
| O                                                                  | 1.136265  | -0.681898 | -0.670118 | C                                                                 | 0.130480  | 1.475683  | 0.545321  |
| B                                                                  | -0.120438 | 0.096924  | -0.414190 | C                                                                 | -1.185743 | -0.946874 | 0.170358  |
| C                                                                  | 0.153494  | 1.420041  | 0.536783  | C                                                                 | -0.544868 | 0.737507  | -1.859186 |
| C                                                                  | -1.246779 | -0.956125 | 0.182223  | C                                                                 | -0.959763 | 2.191736  | 1.029697  |
| C                                                                  | -0.576546 | 0.700486  | -1.852827 | C                                                                 | -0.869005 | 3.392326  | 1.719077  |
| C                                                                  | -0.912039 | 2.187730  | 1.000676  | C                                                                 | 0.380219  | 3.950526  | 1.938094  |
| C                                                                  | -0.768979 | 3.380267  | 1.692607  | C                                                                 | 1.500977  | 3.291860  | 1.463376  |
| C                                                                  | 0.505420  | 3.874555  | 1.931949  | C                                                                 | 1.361609  | 2.085795  | 0.778083  |
| C                                                                  | 1.600483  | 3.163312  | 1.473502  | C                                                                 | -1.687681 | -1.027311 | 1.464457  |

|   |           |           |           |
|---|-----------|-----------|-----------|
| C | -2.612342 | -1.979268 | 1.882007  |
| C | -3.068456 | -2.926366 | 0.982137  |
| C | -2.586989 | -2.906680 | -0.316358 |
| C | -1.662505 | -1.937203 | -0.687468 |
| C | 0.397483  | 0.952200  | -2.874806 |
| C | 0.045664  | 1.524838  | -4.095243 |
| C | -1.274032 | 1.900435  | -4.341009 |
| C | -2.230655 | 1.692619  | -3.350173 |
| C | -1.864934 | 1.122819  | -2.131506 |
| F | -2.213885 | 1.729244  | 0.844963  |
| F | -1.967149 | 4.027058  | 2.166401  |
| F | 0.498770  | 5.117703  | 2.593585  |
| F | 2.712168  | 3.837572  | 1.659723  |
| F | 2.503163  | 1.552964  | 0.336672  |
| F | -1.301880 | -0.163895 | 2.420088  |
| F | -1.246764 | -1.998165 | -1.959496 |
| F | -3.025941 | -3.822359 | -1.196464 |
| F | -3.967781 | -3.848909 | 1.360593  |
| F | -3.071223 | -1.993251 | 3.143960  |
| O | 4.135073  | -3.763170 | 2.813257  |
| H | 0.994642  | -0.578910 | 2.047112  |
| H | 2.314809  | -2.004679 | 3.558850  |
| H | 4.296615  | -3.763642 | 0.183413  |
| H | 2.942687  | -2.322603 | -1.330922 |
| H | 1.421177  | 0.641862  | -2.683511 |
| H | 0.802848  | 1.675514  | -4.862545 |
| H | -1.553909 | 2.345407  | -5.293439 |
| H | -3.266989 | 1.973374  | -3.528732 |
| H | -2.625947 | 0.968445  | -1.369719 |

46

B(C<sub>6</sub>F<sub>5</sub>)Ph<sub>2</sub>-Q

|   |           |           |           |
|---|-----------|-----------|-----------|
| C | 1.492063  | -1.457488 | 1.535256  |
| C | 2.220801  | -2.299868 | 2.276775  |
| C | 3.336477  | -3.095538 | 1.693018  |
| C | 3.635303  | -2.902311 | 0.246175  |
| C | 2.909288  | -2.059788 | -0.495160 |
| C | 1.786532  | -1.318460 | 0.100977  |
| O | 1.137043  | -0.590570 | -0.666597 |
| B | -0.247128 | 0.243074  | -0.389026 |
| C | 0.133185  | 1.512342  | 0.565668  |
| C | -1.258690 | -0.835439 | 0.259269  |
| C | -0.627335 | 0.742824  | -1.868878 |
| C | -0.899658 | 2.407578  | 0.849908  |
| C | -0.734323 | 3.568077  | 1.591684  |
| C | 0.526310  | 3.888747  | 2.078897  |
| C | 1.588394  | 3.039158  | 1.817100  |
| C | 1.372970  | 1.884779  | 1.071080  |
| C | -1.912323 | -0.665674 | 1.486067  |
| C | -2.759494 | -1.643270 | 2.005652  |
| C | -2.973661 | -2.825317 | 1.303662  |

|   |           |           |           |
|---|-----------|-----------|-----------|
| C | -2.341088 | -3.018227 | 0.077270  |
| C | -1.501680 | -2.032601 | -0.433300 |
| C | 0.349355  | 1.319927  | -2.692642 |
| C | 0.045937  | 1.789080  | -3.966298 |
| C | -1.260403 | 1.701210  | -4.444104 |
| C | -2.249599 | 1.143848  | -3.640003 |
| C | -1.931948 | 0.669719  | -2.368253 |
| F | -2.133872 | 2.149876  | 0.400839  |
| F | -1.763731 | 4.375591  | 1.836574  |
| F | 0.709778  | 4.995887  | 2.792103  |
| F | 2.805322  | 3.329877  | 2.276682  |
| F | 2.470799  | 1.123195  | 0.863459  |
| O | 3.982920  | -3.865610 | 2.370255  |
| H | 0.679228  | -0.869375 | 1.943007  |
| H | 2.044791  | -2.439683 | 3.338270  |
| H | 4.462221  | -3.478963 | -0.154971 |
| H | 3.083062  | -1.886457 | -1.551668 |
| H | -1.755648 | 0.247144  | 2.056677  |
| H | -3.253760 | -1.479786 | 2.958586  |
| H | -3.632768 | -3.588592 | 1.705285  |
| H | -2.509134 | -3.932964 | -0.483304 |
| H | -1.031152 | -2.185658 | -1.403260 |
| H | 1.372064  | 1.401959  | -2.326854 |
| H | 0.823090  | 2.227440  | -4.585473 |
| H | -1.504447 | 2.068483  | -5.436242 |
| H | -3.270748 | 1.076662  | -4.003238 |
| H | -2.712940 | 0.236298  | -1.748721 |

46

[B(C<sub>6</sub>F<sub>5</sub>)Ph<sub>2</sub>-Q]<sup>-</sup>

|   |           |           |           |
|---|-----------|-----------|-----------|
| C | 1.588083  | -1.399668 | 1.563261  |
| C | 2.360218  | -2.192697 | 2.366100  |
| C | 3.437759  | -3.014611 | 1.846494  |
| C | 3.650195  | -2.935947 | 0.411991  |
| C | 2.877953  | -2.141746 | -0.384014 |
| C | 1.819746  | -1.353875 | 0.158100  |
| O | 1.140761  | -0.616816 | -0.685303 |
| B | -0.141370 | 0.141623  | -0.400969 |
| C | 0.144215  | 1.465925  | 0.557336  |
| C | -1.237372 | -0.895702 | 0.218203  |
| C | -0.592995 | 0.719008  | -1.857328 |
| C | -0.919619 | 2.287936  | 0.928308  |
| C | -0.782495 | 3.461019  | 1.658193  |
| C | 0.484226  | 3.880376  | 2.035015  |
| C | 1.580015  | 3.116275  | 1.671998  |
| C | 1.393866  | 1.944274  | 0.943168  |
| C | -1.862898 | -0.789048 | 1.465663  |
| C | -2.771723 | -1.742608 | 1.922867  |
| C | -3.082684 | -2.844694 | 1.132990  |
| C | -2.472999 | -2.981971 | -0.112548 |
| C | -1.569019 | -2.020506 | -0.553899 |

|   |           |           |           |   |           |           |           |
|---|-----------|-----------|-----------|---|-----------|-----------|-----------|
| C | 0.381949  | 1.134486  | -2.775788 | C | -1.409819 | 1.816445  | -4.337164 |
| C | 0.043664  | 1.666280  | -4.017306 | C | -2.339373 | 1.599999  | -3.322833 |
| C | -1.296124 | 1.801722  | -4.376141 | C | -1.928766 | 1.067707  | -2.101338 |
| C | -2.283779 | 1.398739  | -3.481630 | F | -1.438408 | -0.062775 | 2.396194  |
| C | -1.931600 | 0.865888  | -2.242300 | F | -1.113948 | -2.049135 | -1.903025 |
| F | -2.174636 | 1.964774  | 0.575878  | F | -2.907088 | -3.876358 | -1.173111 |
| F | -1.850589 | 4.195854  | 1.991665  | F | -3.999880 | -3.818059 | 1.321740  |
| F | 0.644284  | 5.009134  | 2.734325  | F | -3.235374 | -1.882423 | 3.081869  |
| F | 2.808692  | 3.517988  | 2.018197  | O | 4.205909  | -3.729913 | 2.756346  |
| F | 2.522201  | 1.293771  | 0.620578  | H | 0.903524  | -0.691830 | 2.060926  |
| O | 4.139430  | -3.740441 | 2.584906  | H | 2.242898  | -2.145859 | 3.531585  |
| H | 0.790952  | -0.795087 | 1.980046  | H | 4.477484  | -3.533944 | 0.141919  |
| H | 2.194157  | -2.234054 | 3.438294  | H | 3.096180  | -2.078092 | -1.332513 |
| H | 4.454092  | -3.540632 | 0.003038  | H | -1.970307 | 2.044065  | 0.660418  |
| H | 3.031660  | -2.079047 | -1.457019 | H | -1.625121 | 4.148179  | 1.886741  |
| H | -1.629196 | 0.057134  | 2.109387  | H | 0.674255  | 4.869294  | 2.513367  |
| H | -3.235342 | -1.624862 | 2.898896  | H | 2.610037  | 3.437627  | 1.886153  |
| H | -3.789792 | -3.591052 | 1.484410  | H | 2.241897  | 1.320330  | 0.648747  |
| H | -2.703531 | -3.840100 | -0.738618 | H | 1.355769  | 0.677909  | -2.708452 |
| H | -1.100725 | -2.135465 | -1.529692 | H | 0.661953  | 1.640608  | -4.895850 |
| H | 1.429676  | 1.024940  | -2.504472 | H | -1.722242 | 2.229955  | -5.293766 |
| H | 0.824395  | 1.975234  | -4.708157 | H | -3.388329 | 1.841158  | -3.486579 |
| H | -1.566669 | 2.215147  | -5.344146 | H | -2.677000 | 0.890170  | -1.328744 |
| H | -3.332492 | 1.496154  | -3.751351 |   |           |           |           |
| H | -2.713137 | 0.548085  | -1.556427 |   |           |           |           |

46

[B(C<sub>6</sub>F<sub>5</sub>)Ph<sub>2</sub>]<sup>2-</sup>

|   |           |           |           |
|---|-----------|-----------|-----------|
| C | 1.678568  | -1.321867 | 1.628160  |
| C | 2.441449  | -2.138803 | 2.460578  |
| C | 3.504668  | -2.990470 | 1.996007  |
| C | 3.690071  | -2.912776 | 0.568721  |
| C | 2.922270  | -2.101550 | -0.256489 |
| C | 1.901521  | -1.286395 | 0.246089  |
| O | 1.218818  | -0.492146 | -0.653028 |
| B | -0.050219 | 0.173107  | -0.391216 |
| C | 0.113215  | 1.509927  | 0.555110  |
| C | -1.186472 | -0.920413 | 0.185794  |
| C | -0.592386 | 0.732739  | -1.840945 |
| C | -0.955223 | 2.341553  | 0.923416  |
| C | -0.767852 | 3.533491  | 1.617337  |
| C | 0.518918  | 3.940361  | 1.968527  |
| C | 1.599979  | 3.137687  | 1.614079  |
| C | 1.394862  | 1.947137  | 0.916235  |
| C | -1.763628 | -0.959254 | 1.450188  |
| C | -2.701285 | -1.909390 | 1.848581  |
| C | -3.091232 | -2.896146 | 0.961350  |
| C | -2.532194 | -2.919499 | -0.306542 |
| C | -1.601365 | -1.950078 | -0.659705 |
| C | 0.319239  | 0.953110  | -2.883621 |
| C | -0.074570 | 1.485758  | -4.109061 |

46

BPh<sub>3</sub>-Q

|   |           |           |           |
|---|-----------|-----------|-----------|
| C | 1.441493  | -1.511654 | 1.496920  |
| C | 2.181198  | -2.355153 | 2.228159  |
| C | 3.356643  | -3.069295 | 1.659670  |
| C | 3.706342  | -2.792256 | 0.238239  |
| C | 2.975931  | -1.944768 | -0.493134 |
| C | 1.794016  | -1.280944 | 0.085277  |
| O | 1.153666  | -0.536058 | -0.673455 |
| B | -0.253999 | 0.284374  | -0.399191 |
| C | 0.147960  | 1.536646  | 0.539446  |
| C | -1.259749 | -0.797419 | 0.262246  |
| C | -0.661859 | 0.745386  | -1.887657 |
| C | -0.843291 | 2.510915  | 0.752725  |
| C | -0.623321 | 3.617823  | 1.563504  |
| C | 0.615456  | 3.799031  | 2.178253  |
| C | 1.621948  | 2.865725  | 1.965497  |
| C | 1.384680  | 1.753159  | 1.155898  |
| C | -1.978632 | -0.562154 | 1.441455  |
| C | -2.829925 | -1.525296 | 1.983618  |
| C | -2.979465 | -2.758541 | 1.357186  |
| C | -2.280982 | -3.017126 | 0.179159  |
| C | -1.441514 | -2.045353 | -0.357174 |
| C | 0.258130  | 1.440237  | -2.687554 |
| C | -0.069136 | 1.882429  | -3.964065 |
| C | -1.347879 | 1.653390  | -4.471916 |
| C | -2.283259 | 0.980791  | -3.693829 |

|   |           |           |           |   |           |           |           |
|---|-----------|-----------|-----------|---|-----------|-----------|-----------|
| C | -1.937854 | 0.529449  | -2.419328 | H | -1.513496 | 4.219994  | 1.803465  |
| H | -1.807328 | 2.393325  | 0.261210  | H | 0.746149  | 4.716101  | 2.720550  |
| H | -1.414683 | 4.346755  | 1.710762  | H | 2.626901  | 3.169588  | 2.221887  |
| H | 0.794386  | 4.665315  | 2.807258  | H | 2.254295  | 1.159647  | 0.859147  |
| H | 2.597227  | 3.002560  | 2.423371  | H | -1.886753 | 0.276244  | 1.926220  |
| H | 2.209924  | 1.060005  | 1.000262  | H | 1.365405  | 1.033013  | -2.580351 |
| H | -1.864461 | 0.391379  | 1.951845  | H | 0.672006  | 1.930139  | -4.778870 |
| H | 1.252415  | 1.642958  | -2.292517 | H | -1.742407 | 2.142719  | -5.331961 |
| H | 0.665695  | 2.413442  | -4.562337 | H | -3.442923 | 1.436308  | -3.662911 |
| H | -1.611168 | 2.001926  | -5.466027 | H | -2.735803 | 0.517562  | -1.483855 |
| H | -3.283003 | 0.802370  | -4.079033 | H | -0.818222 | -2.283267 | -1.333039 |
| H | -2.677818 | -0.003202 | -1.826884 | H | -2.442959 | -3.970331 | -0.548945 |
| H | -0.920769 | -2.252171 | -1.291287 | H | -3.821542 | -3.526637 | 1.473098  |
| H | -2.398339 | -3.972664 | -0.323673 | H | -3.531631 | -1.385966 | 2.699937  |
| H | -3.638566 | -3.511167 | 1.778690  | O | 4.200307  | -3.728512 | 2.514019  |
| H | -3.374665 | -1.311848 | 2.898664  | H | 0.713461  | -0.933998 | 1.949384  |
| O | 4.011669  | -3.841081 | 2.327840  | H | 2.129958  | -2.398859 | 3.371039  |
| H | 0.587636  | -0.979100 | 1.896826  | H | 4.614125  | -3.332035 | -0.030960 |
| H | 1.965194  | -2.555931 | 3.272384  | H | 3.176536  | -1.851249 | -1.454891 |
| H | 4.574126  | -3.312592 | -0.153619 |   |           |           |           |
| H | 3.187333  | -1.712480 | -1.531490 |   |           |           |           |

46

[BPh<sub>3</sub>-Q]<sup>-</sup>

|   |           |           |           |
|---|-----------|-----------|-----------|
| C | 1.559950  | -1.466958 | 1.532462  |
| C | 2.341811  | -2.272009 | 2.313625  |
| C | 3.488874  | -2.993969 | 1.793543  |
| C | 3.759348  | -2.802490 | 0.379373  |
| C | 2.978882  | -1.997002 | -0.396995 |
| C | 1.853156  | -1.304176 | 0.144757  |
| O | 1.176359  | -0.544943 | -0.677227 |
| B | -0.135353 | 0.193365  | -0.386115 |
| C | 0.149915  | 1.495727  | 0.553714  |
| C | -1.223388 | -0.863115 | 0.226458  |
| C | -0.627219 | 0.717658  | -1.852173 |
| C | -0.884981 | 2.404076  | 0.834937  |
| C | -0.684503 | 3.544530  | 1.606508  |
| C | 0.581187  | 3.826615  | 2.118517  |
| C | 1.631392  | 2.958359  | 1.839249  |
| C | 1.413185  | 1.816081  | 1.068207  |
| C | -2.010537 | -0.647020 | 1.364379  |
| C | -2.939576 | -1.588945 | 1.810751  |
| C | -3.102989 | -2.788628 | 1.126798  |
| C | -2.329186 | -3.034771 | -0.006976 |
| C | -1.413352 | -2.083485 | -0.443609 |
| C | 0.307615  | 1.124221  | -2.815814 |
| C | -0.080562 | 1.628291  | -4.054030 |
| C | -1.433698 | 1.748946  | -4.367093 |
| C | -2.383850 | 1.354462  | -3.429827 |
| C | -1.979711 | 0.843204  | -2.196556 |
| H | -1.874772 | 2.212652  | 0.422371  |

46

[BPh<sub>3</sub>-Q]<sup>2-</sup>

|   |           |           |           |
|---|-----------|-----------|-----------|
| C | 1.683918  | -1.509599 | 1.511092  |
| C | 2.487170  | -2.366786 | 2.260780  |
| C | 3.600147  | -3.102893 | 1.721645  |
| C | 3.789975  | -2.859992 | 0.314512  |
| C | 2.984372  | -2.004543 | -0.427571 |
| C | 1.915311  | -1.303158 | 0.144453  |
| O | 1.199606  | -0.457529 | -0.673039 |
| B | -0.082623 | 0.197245  | -0.358145 |
| C | 0.126340  | 1.533392  | 0.590687  |
| C | -1.194181 | -0.856315 | 0.245079  |
| C | -0.652422 | 0.735514  | -1.814322 |
| C | -0.871598 | 2.502927  | 0.789933  |
| C | -0.667598 | 3.644352  | 1.564471  |
| C | 0.569233  | 3.866146  | 2.165810  |
| C | 1.588019  | 2.935732  | 1.969475  |
| C | 1.367180  | 1.797890  | 1.194113  |
| C | -2.216954 | -0.540100 | 1.149079  |
| C | -3.183612 | -1.471899 | 1.537165  |
| C | -3.145178 | -2.768382 | 1.035836  |
| C | -2.125637 | -3.119509 | 0.149412  |
| C | -1.175978 | -2.178576 | -0.233533 |
| C | 0.245335  | 0.996524  | -2.862158 |
| C | -0.175259 | 1.495121  | -4.093023 |
| C | -1.526816 | 1.751954  | -4.323863 |
| C | -2.443351 | 1.491764  | -3.308163 |
| C | -2.006316 | 0.988256  | -2.082299 |
| H | -1.837046 | 2.371023  | 0.302280  |
| H | -1.472112 | 4.367420  | 1.691094  |
| H | 0.738387  | 4.754110  | 2.771814  |

|   |           |           |           |
|---|-----------|-----------|-----------|
| H | 2.563379  | 3.096846  | 2.424730  |
| H | 2.171541  | 1.081332  | 1.050457  |
| H | -2.253819 | 0.460091  | 1.576746  |
| H | 1.295546  | 0.779836  | -2.685126 |
| H | 0.552245  | 1.682984  | -4.881471 |
| H | -1.860660 | 2.140123  | -5.284198 |
| H | -3.504390 | 1.671176  | -3.475666 |
| H | -2.742989 | 0.761745  | -1.311726 |
| H | -0.373282 | -2.461486 | -0.910924 |
| H | -2.068925 | -4.135926 | -0.235104 |
| H | -3.889900 | -3.501278 | 1.339633  |
| H | -3.962572 | -1.184523 | 2.241931  |
| O | 4.336762  | -3.881952 | 2.407500  |
| H | 0.857968  | -0.986526 | 1.990498  |
| H | 2.278489  | -2.505175 | 3.321118  |
| H | 4.614314  | -3.385994 | -0.167507 |
| H | 3.169381  | -1.850228 | -1.491303 |

34

[BEt<sub>3</sub>-Q]

|   |           |           |           |
|---|-----------|-----------|-----------|
| C | 1.640525  | -0.647381 | 1.198954  |
| C | 2.784364  | -1.160956 | 1.667357  |
| C | 3.560199  | -2.176195 | 0.902658  |
| C | 3.018985  | -2.599837 | -0.417882 |
| C | 1.876806  | -2.088233 | -0.887474 |
| C | 1.118610  | -1.092350 | -0.105867 |
| O | 0.061462  | -0.676976 | -0.590878 |
| O | 4.594693  | -2.637320 | 1.337541  |
| B | -1.108487 | 0.399928  | 0.003039  |
| C | -1.774200 | -0.437995 | 1.220752  |
| C | -0.354619 | 1.775591  | 0.434850  |
| C | -2.037254 | 0.564755  | -1.305945 |
| C | -2.733544 | -0.713711 | -1.779996 |
| C | 0.805683  | 2.225333  | -0.459668 |
| C | -2.995867 | 0.301203  | 1.778765  |
| H | 1.063870  | 0.095804  | 1.734966  |
| H | 3.207131  | -0.863898 | 2.621655  |
| H | 3.601448  | -3.337475 | -0.960118 |
| H | 1.443699  | -2.369041 | -1.841709 |
| H | -2.082159 | -1.439372 | 0.890402  |
| H | -1.056213 | -0.598667 | 2.040147  |
| H | -0.030537 | 1.782343  | 1.487255  |
| H | -1.134674 | 2.548544  | 0.389473  |
| H | -2.798386 | 1.325820  | -1.082127 |
| H | -1.450602 | 0.986529  | -2.135079 |
| H | -3.299131 | -0.567600 | -2.705841 |
| H | -3.434052 | -1.085673 | -1.024378 |
| H | -2.005685 | -1.512710 | -1.962663 |
| H | 1.158914  | 3.230873  | -0.211781 |
| H | 0.509959  | 2.228138  | -1.513644 |
| H | 1.675517  | 1.560211  | -0.375450 |

|   |           |           |          |
|---|-----------|-----------|----------|
| H | -3.452522 | -0.225219 | 2.622826 |
| H | -2.726004 | 1.305648  | 2.122712 |
| H | -3.765245 | 0.419473  | 1.008521 |

34

[BEt<sub>3</sub>-Q]<sup>-</sup>

|   |           |           |           |
|---|-----------|-----------|-----------|
| C | 1.624793  | -0.700156 | 1.192530  |
| C | 2.781073  | -1.241088 | 1.683224  |
| C | 3.562963  | -2.220294 | 0.951283  |
| C | 3.033734  | -2.586256 | -0.351050 |
| C | 1.882018  | -2.043685 | -0.839362 |
| C | 1.125281  | -1.082587 | -0.092457 |
| O | 0.047209  | -0.616726 | -0.640099 |
| O | 4.619560  | -2.713284 | 1.407463  |
| B | -1.030220 | 0.345222  | -0.029908 |
| C | -1.745628 | -0.431344 | 1.221693  |
| C | -0.361588 | 1.783741  | 0.406815  |
| C | -2.050185 | 0.560856  | -1.291741 |
| C | -2.729708 | -0.721699 | -1.778325 |
| C | 0.759970  | 2.271276  | -0.516223 |
| C | -2.969691 | 0.318449  | 1.757403  |
| H | 1.065815  | 0.033293  | 1.760071  |
| H | 3.164119  | -0.949493 | 2.657190  |
| H | 3.601972  | -3.316815 | -0.920021 |
| H | 1.486613  | -2.317676 | -1.813334 |
| H | -2.052982 | -1.442354 | 0.914301  |
| H | -1.040891 | -0.583227 | 2.052990  |
| H | 0.006623  | 1.789638  | 1.445608  |
| H | -1.169206 | 2.532309  | 0.396832  |
| H | -2.820975 | 1.300609  | -1.026124 |
| H | -1.495903 | 1.006309  | -2.132589 |
| H | -3.331387 | -0.582178 | -2.686517 |
| H | -3.394912 | -1.131002 | -1.007989 |
| H | -1.977203 | -1.489398 | -1.989871 |
| H | 1.110672  | 3.282656  | -0.272809 |
| H | 0.427845  | 2.279825  | -1.560577 |
| H | 1.628477  | 1.604667  | -0.466846 |
| H | -3.435539 | -0.172031 | 2.622098  |
| H | -2.700301 | 1.336320  | 2.064897  |
| H | -3.739736 | 0.415708  | 0.982820  |

34

[BEt<sub>3</sub>-Q]<sup>2-</sup>

|   |          |           |           |
|---|----------|-----------|-----------|
| C | 1.760275 | -0.589105 | 1.094794  |
| C | 2.844891 | -1.252811 | 1.671021  |
| C | 3.447219 | -2.436152 | 1.121589  |
| C | 2.797366 | -2.864359 | -0.088797 |
| C | 1.710946 | -2.201693 | -0.652612 |
| C | 1.155841 | -1.042816 | -0.088131 |
| O | 0.130932 | -0.424257 | -0.743520 |
| O | 4.443970 | -3.040508 | 1.644099  |



|                                                           |           |           |           |                                                           |           |           |           |
|-----------------------------------------------------------|-----------|-----------|-----------|-----------------------------------------------------------|-----------|-----------|-----------|
| B                                                         | -0.959204 | 0.392337  | -0.109269 | H                                                         | -1.141141 | 2.087155  | 2.105051  |
| C                                                         | -1.643678 | -0.407785 | 1.162431  | H                                                         | 1.234450  | 1.361009  | 2.410844  |
| C                                                         | -0.430044 | 1.901064  | 0.362795  | H                                                         | 1.973907  | 1.850669  | -1.888560 |
| C                                                         | -2.050602 | 0.594867  | -1.340468 | H                                                         | -0.401684 | 2.576818  | -2.194352 |
| C                                                         | -2.624754 | -0.726533 | -1.855145 | H                                                         | -3.337674 | 2.706013  | 1.960649  |
| C                                                         | 0.686639  | 2.438120  | -0.536641 | H                                                         | -3.827911 | 4.454410  | 0.268001  |
| C                                                         | -2.889003 | 0.280321  | 1.730278  | H                                                         | -4.635999 | 0.336259  | 1.302296  |
| H                                                         | 1.363008  | 0.306111  | 1.569879  | H                                                         | -6.186188 | -1.235695 | 0.207590  |
| H                                                         | 3.281151  | -0.867617 | 2.593686  | H                                                         | -7.257963 | -0.630727 | -1.940875 |
| H                                                         | 3.195229  | -3.760911 | -0.567051 | H                                                         | -6.793247 | 1.556090  | -3.005491 |
| H                                                         | 1.254855  | -2.570112 | -1.573021 | H                                                         | -5.248401 | 3.150099  | -1.936029 |
| H                                                         | -1.907378 | -1.434427 | 0.861589  | H                                                         | 4.660679  | -0.516601 | -0.051466 |
| H                                                         | -0.904224 | -0.525879 | 1.967594  | H                                                         | 4.170427  | 1.231738  | -1.744170 |
| H                                                         | -0.072273 | 1.907015  | 1.406778  | H                                                         | 5.468801  | 3.601479  | -1.085957 |
| H                                                         | -1.274089 | 2.614165  | 0.348320  | H                                                         | 7.018986  | 5.173487  | 0.008676  |
| H                                                         | -2.875574 | 1.264199  | -1.041574 | H                                                         | 8.090708  | 4.568650  | 2.157206  |
| H                                                         | -1.542846 | 1.104164  | -2.176531 | H                                                         | 7.625941  | 2.381910  | 3.221959  |
| H                                                         | -3.240930 | -0.635411 | -2.765159 | H                                                         | 6.081102  | 0.787846  | 2.152567  |
| H                                                         | -3.250146 | -1.205072 | -1.089246 |                                                           |           |           |           |
| H                                                         | -1.798001 | -1.413621 | -2.065255 |                                                           |           |           |           |
| H                                                         | 1.024928  | 3.454216  | -0.275107 | 40                                                        |           |           |           |
| H                                                         | 0.361205  | 2.459856  | -1.584593 | [SiPhH <sub>2</sub> -Q-SiPhH <sub>2</sub> ] <sup>++</sup> |           |           |           |
| H                                                         | 1.551781  | 1.768053  | -0.493805 | C                                                         | -0.800356 | 1.499774  | 0.671573  |
| H                                                         | -3.318018 | -0.219548 | 2.613716  | C                                                         | 0.283314  | 0.674041  | 0.643173  |
| H                                                         | -2.661368 | 1.314220  | 2.023064  | C                                                         | 1.523684  | 1.116381  | 0.080050  |
| H                                                         | -3.685418 | 0.339497  | 0.975668  | C                                                         | 1.633146  | 2.438048  | -0.455160 |
|                                                           |           |           |           | C                                                         | 0.549476  | 3.263780  | -0.426761 |
| 40                                                        |           |           |           | C                                                         | -0.690894 | 2.821440  | 0.136363  |
| [SiPhH <sub>2</sub> -Q-SiPhH <sub>2</sub> ] <sup>2+</sup> |           |           |           | O                                                         | -1.671774 | 3.678173  | 0.133434  |
| C                                                         | -0.447004 | 2.022194  | 1.274101  | O                                                         | 2.504563  | 0.259648  | 0.082979  |
| C                                                         | 0.825234  | 1.634219  | 1.442815  | Si                                                        | -3.293624 | 3.553218  | 0.773241  |
| C                                                         | 1.745508  | 1.551326  | 0.288896  | C                                                         | -4.130309 | 2.099681  | 0.001451  |
| C                                                         | 1.279769  | 1.915629  | -1.057609 | C                                                         | -4.554849 | 1.024392  | 0.797466  |
| C                                                         | 0.007531  | 2.303606  | -1.226323 | C                                                         | -5.189227 | -0.073963 | 0.224320  |
| C                                                         | -0.912744 | 2.386496  | -0.072405 | C                                                         | -5.403339 | -0.109359 | -1.151267 |
| O                                                         | -2.067739 | 2.787081  | -0.307429 | C                                                         | -4.988908 | 0.951401  | -1.955483 |
| O                                                         | 2.900501  | 1.150733  | 0.523918  | C                                                         | -4.359361 | 2.050705  | -1.382790 |
| Si                                                        | -3.703287 | 3.025758  | 0.571572  | Si                                                        | 4.126422  | 0.384611  | -0.556804 |
| C                                                         | -4.813065 | 1.847474  | -0.250526 | C                                                         | 4.963072  | 1.838165  | 0.214992  |
| C                                                         | -5.086655 | 0.603632  | 0.349660  | C                                                         | 5.387649  | 2.913438  | -0.581024 |
| C                                                         | -5.963524 | -0.283300 | -0.260335 | C                                                         | 6.021994  | 4.011808  | -0.007868 |
| C                                                         | -6.568583 | 0.061828  | -1.469282 | C                                                         | 6.236031  | 4.047235  | 1.367730  |
| C                                                         | -6.306628 | 1.292648  | -2.073094 | C                                                         | 5.821562  | 2.986491  | 2.171947  |
| C                                                         | -5.432766 | 2.185931  | -1.469142 | C                                                         | 5.192050  | 1.887172  | 1.599244  |
| Si                                                        | 4.536046  | 0.912041  | -0.355083 | H                                                         | -1.747338 | 1.158247  | 1.075776  |
| C                                                         | 5.645817  | 2.090365  | 0.466969  | H                                                         | 0.243577  | -0.336964 | 1.032874  |
| C                                                         | 5.919433  | 3.334164  | -0.133294 | H                                                         | 2.580128  | 2.779575  | -0.859364 |
| C                                                         | 6.796300  | 4.221126  | 0.476660  | H                                                         | 0.589213  | 4.274786  | -0.816461 |
| C                                                         | 7.401330  | 3.876072  | 1.685643  | H                                                         | -3.125385 | 3.363465  | 2.227609  |
| C                                                         | 7.139346  | 2.645295  | 2.289533  | H                                                         | -3.823757 | 4.870321  | 0.402839  |
| C                                                         | 6.265487  | 1.751982  | 1.685621  | H                                                         | -4.399258 | 1.046451  | 1.874243  |
|                                                           |           |           |           | H                                                         | -5.521100 | -0.896451 | 0.848799  |

|   |           |           |           |
|---|-----------|-----------|-----------|
| H | -5.900701 | -0.963528 | -1.598731 |
| H | -5.164763 | 0.923224  | -3.025461 |
| H | -4.052465 | 2.877664  | -2.019142 |
| H | 4.656562  | -0.932483 | -0.186381 |
| H | 3.958208  | 0.574348  | -2.011177 |
| H | 5.232113  | 2.891356  | -1.657808 |
| H | 6.353896  | 4.834285  | -0.632346 |
| H | 6.733366  | 4.901416  | 1.815202  |
| H | 5.997359  | 3.014692  | 3.241934  |
| H | 4.885122  | 1.060226  | 2.235597  |

40

SiPhH<sub>2</sub>-Q-SiPhH<sub>2</sub>

|    |           |           |           |
|----|-----------|-----------|-----------|
| C  | -0.269108 | 1.262305  | 2.157031  |
| C  | 1.039575  | 1.063781  | 2.580668  |
| C  | 2.098495  | 1.219771  | 1.689744  |
| C  | 1.840821  | 1.585318  | 0.366942  |
| C  | 0.530966  | 1.774712  | -0.057635 |
| C  | -0.528872 | 1.611400  | 0.830966  |
| O  | -1.793803 | 1.823760  | 0.357465  |
| O  | 3.364479  | 1.020744  | 2.172318  |
| Si | -3.209475 | 1.264235  | 1.045477  |
| C  | -4.524722 | 1.585008  | -0.229483 |
| C  | -4.187832 | 1.738520  | -1.580288 |
| C  | -5.174238 | 1.953031  | -2.538910 |
| C  | -6.512501 | 2.014751  | -2.159056 |
| C  | -6.863791 | 1.867916  | -0.819295 |
| C  | -5.874711 | 1.658439  | 0.136914  |
| Si | 4.711589  | 0.616592  | 1.271505  |
| C  | 5.337666  | 2.125196  | 0.366382  |
| C  | 6.270256  | 2.017836  | -0.673528 |
| C  | 6.744667  | 3.150825  | -1.327512 |
| C  | 6.284916  | 4.411570  | -0.953017 |
| C  | 5.351719  | 4.536211  | 0.072767  |
| C  | 4.882772  | 3.400291  | 0.727573  |
| H  | -1.085051 | 1.153450  | 2.866231  |
| H  | 1.259662  | 0.787475  | 3.605788  |
| H  | 2.659751  | 1.738574  | -0.329960 |
| H  | 0.312214  | 2.057312  | -1.081417 |
| H  | -3.041006 | -0.173819 | 1.369516  |
| H  | -3.531353 | 1.981436  | 2.304240  |
| H  | -3.143343 | 1.701008  | -1.876888 |
| H  | -4.899437 | 2.074354  | -3.581938 |
| H  | -7.281993 | 2.182105  | -2.906180 |
| H  | -7.905720 | 1.923074  | -0.520429 |
| H  | -6.161478 | 1.559385  | 1.181926  |
| H  | 5.689597  | 0.118297  | 2.259416  |
| H  | 4.380707  | -0.453027 | 0.297899  |
| H  | 6.630122  | 1.038726  | -0.983934 |
| H  | 7.467313  | 3.051932  | -2.131305 |
| H  | 6.651127  | 5.296177  | -1.464482 |

|   |          |          |          |
|---|----------|----------|----------|
| H | 4.988188 | 5.517395 | 0.361116 |
| H | 4.146930 | 3.500843 | 1.522178 |

56

[SiEt<sub>3</sub>-Q-SiEt<sub>3</sub>]<sup>2+</sup>

|    |           |           |           |
|----|-----------|-----------|-----------|
| C  | 1.044880  | 0.915200  | -0.379609 |
| C  | -0.245250 | 1.249210  | -0.522499 |
| C  | -1.312970 | 0.273940  | -0.211339 |
| C  | -0.965140 | -1.076370 | 0.262981  |
| C  | 0.324810  | -1.411080 | 0.404401  |
| C  | 1.393180  | -0.437800 | 0.087161  |
| O  | 2.565180  | -0.823600 | 0.225571  |
| O  | -2.485370 | 0.652230  | -0.365779 |
| Si | 4.308470  | -0.105290 | 0.006391  |
| C  | 4.469340  | -0.058110 | -1.849449 |
| C  | 4.198030  | 1.562760  | 0.839401  |
| C  | 5.281360  | -1.390520 | 0.917861  |
| C  | 6.791220  | -1.251580 | 0.627621  |
| C  | 3.400010  | 1.591960  | 2.151751  |
| C  | 5.651510  | 0.847890  | -2.256789 |
| Si | -4.228750 | -0.064790 | -0.112819 |
| C  | -4.149290 | -1.770710 | -0.872349 |
| C  | -5.201620 | 1.205100  | -1.044679 |
| C  | -4.354650 | 0.003720  | 1.742691  |
| C  | -5.147740 | 2.607650  | -0.418529 |
| C  | -5.767190 | -0.462360 | 2.157611  |
| C  | -5.520170 | -2.157360 | -1.469449 |
| H  | 1.849530  | 1.610190  | -0.598739 |
| H  | -0.567210 | 2.228060  | -0.864919 |
| H  | -1.769170 | -1.771380 | 0.484251  |
| H  | 0.647000  | -2.389150 | 0.748821  |
| H  | 4.616060  | -1.074830 | -2.229469 |
| H  | 3.542110  | 0.317070  | -2.301299 |
| H  | 3.855070  | 2.336350  | 0.141801  |
| H  | 5.244870  | 1.825620  | 1.050491  |
| H  | 4.932600  | -2.385370 | 0.619181  |
| H  | 5.091110  | -1.298510 | 1.993161  |
| H  | 7.354760  | -1.968680 | 1.226181  |
| H  | 7.016590  | -1.453610 | -0.422609 |
| H  | 7.170960  | -0.255550 | 0.874791  |
| H  | 3.489360  | 2.565550  | 2.636211  |
| H  | 3.756460  | 0.839120  | 2.859701  |
| H  | 2.329530  | 1.414360  | 1.990801  |
| H  | 5.756790  | 0.859560  | -3.343019 |
| H  | 5.503870  | 1.879990  | -1.927749 |
| H  | 6.599120  | 0.493650  | -1.843239 |
| H  | -3.862020 | -2.506180 | -0.110419 |
| H  | -3.387130 | -1.804210 | -1.661189 |
| H  | -4.860340 | 1.220600  | -2.086969 |
| H  | -6.238950 | 0.847060  | -1.084909 |
| H  | -4.173960 | 1.025750  | 2.092271  |

|   |           |           |           |
|---|-----------|-----------|-----------|
| H | -3.595050 | -0.637720 | 2.206031  |
| H | -5.715090 | 3.316950  | -1.022889 |
| H | -5.578880 | 2.613960  | 0.585981  |
| H | -4.122120 | 2.982270  | -0.349169 |
| H | -5.877340 | -0.413170 | 3.242251  |
| H | -5.959320 | -1.495990 | 1.855701  |
| H | -6.545530 | 0.171600  | 1.722831  |
| H | -5.484390 | -3.172530 | -1.867729 |
| H | -5.800710 | -1.488710 | -2.286389 |
| H | -6.315000 | -2.129230 | -0.718769 |

56

[SiEt<sub>3</sub>-Q-SiEt<sub>3</sub>]<sup>+</sup>

|    |           |           |           |
|----|-----------|-----------|-----------|
| C  | 0.938500  | -0.310290 | -0.890639 |
| C  | -0.369570 | -0.421280 | -1.258169 |
| C  | -1.418750 | -0.091450 | -0.339859 |
| C  | -1.085220 | 0.361780  | 0.975961  |
| C  | 0.222440  | 0.473250  | 1.343171  |
| C  | 1.271310  | 0.140950  | 0.426031  |
| O  | 2.490460  | 0.273430  | 0.851771  |
| O  | -2.636230 | -0.226870 | -0.767429 |
| Si | 4.054310  | -0.046600 | 0.094461  |
| C  | 4.158300  | -1.901630 | -0.139209 |
| C  | 4.090640  | 0.915130  | -1.515119 |
| C  | 5.228010  | 0.632500  | 1.370391  |
| C  | 6.682660  | 0.196420  | 1.127721  |
| C  | 3.422960  | 2.295520  | -1.427919 |
| C  | 5.212730  | -2.298300 | -1.187839 |
| Si | -4.251530 | 0.014930  | -0.099499 |
| C  | -4.579050 | 1.850480  | -0.230379 |
| C  | -4.274180 | -0.644430 | 1.654501  |
| C  | -5.289890 | -1.007860 | -1.258059 |
| C  | -3.596230 | -2.012950 | 1.817101  |
| C  | -6.792010 | -0.895020 | -0.948799 |
| C  | -3.558090 | 2.751350  | 0.476731  |
| H  | 1.731820  | -0.556630 | -1.587879 |
| H  | -0.659770 | -0.758570 | -2.246909 |
| H  | -1.880770 | 0.617200  | 1.666301  |
| H  | 0.512600  | 0.813730  | 2.330791  |
| H  | 4.391160  | -2.362240 | 0.827951  |
| H  | 3.176730  | -2.295700 | -0.431269 |
| H  | 3.666360  | 0.331300  | -2.340509 |
| H  | 5.152960  | 1.033790  | -1.768409 |
| H  | 4.894420  | 0.298410  | 2.359531  |
| H  | 5.154070  | 1.726310  | 1.375901  |
| H  | 7.353670  | 0.651210  | 1.859091  |
| H  | 6.792040  | -0.888570 | 1.213801  |
| H  | 7.037770  | 0.490800  | 0.134851  |
| H  | 3.559480  | 2.858560  | -2.353389 |
| H  | 3.842400  | 2.893640  | -0.613839 |
| H  | 2.345570  | 2.211550  | -1.251729 |

|   |           |           |           |
|---|-----------|-----------|-----------|
| H | 5.278280  | -3.384050 | -1.284019 |
| H | 4.968670  | -1.893780 | -2.174309 |
| H | 6.208510  | -1.933830 | -0.920079 |
| H | -5.580450 | 2.023560  | 0.185071  |
| H | -4.646880 | 2.112250  | -1.292709 |
| H | -3.868840 | 0.083080  | 2.367191  |
| H | -5.337680 | -0.729210 | 1.916171  |
| H | -5.087570 | -0.678210 | -2.283689 |
| H | -4.967790 | -2.054250 | -1.205069 |
| H | -3.705910 | -2.389910 | 2.835991  |
| H | -4.034020 | -2.754890 | 1.143371  |
| H | -2.524180 | -1.964800 | 1.599171  |
| H | -7.380610 | -1.493250 | -1.647079 |
| H | -7.024990 | -1.250580 | 0.059351  |
| H | -7.142990 | 0.138100  | -1.028429 |
| H | -3.832000 | 3.804450  | 0.383891  |
| H | -2.557620 | 2.638730  | 0.046301  |
| H | -3.494500 | 2.527620  | 1.546761  |

56

SiEt<sub>3</sub>-Q-SiEt<sub>3</sub>

|    |           |           |           |
|----|-----------|-----------|-----------|
| C  | 0.633840  | 0.857140  | -1.298990 |
| C  | -0.739960 | 1.073110  | -1.274760 |
| C  | -1.619279 | -0.007881 | -1.289500 |
| C  | -1.116879 | -1.306281 | -1.383790 |
| C  | 0.256111  | -1.522980 | -1.405450 |
| C  | 1.139641  | -0.444600 | -1.338690 |
| O  | 2.480271  | -0.702579 | -1.330600 |
| O  | -2.968020 | 0.211119  | -1.177960 |
| Si | 3.569121  | -0.054209 | -0.210680 |
| C  | 4.284850  | 1.576451  | -0.839920 |
| C  | 2.672780  | 0.173041  | 1.428250  |
| C  | 4.926031  | -1.339049 | -0.071120 |
| C  | 6.062731  | -0.900998 | 0.862310  |
| C  | 2.112971  | -1.146070 | 1.977910  |
| C  | 4.626820  | 2.575851  | 0.274850  |
| Si | -3.667299 | 0.103789  | 0.362760  |
| C  | -2.546490 | 0.938249  | 1.627330  |
| C  | -3.923159 | -1.707461 | 0.792830  |
| C  | -5.293280 | 1.015948  | 0.182330  |
| C  | -4.841239 | -2.431812 | -0.200180 |
| C  | -5.100060 | 2.520848  | -0.047770 |
| C  | -1.337529 | 0.115139  | 2.098700  |
| H  | 1.318910  | 1.699540  | -1.279570 |
| H  | -1.147150 | 2.078129  | -1.226870 |
| H  | -1.813279 | -2.138391 | -1.423920 |
| H  | 0.666881  | -2.525580 | -1.460320 |
| H  | 5.182900  | 1.345931  | -1.427190 |
| H  | 3.583620  | 2.032801  | -1.547780 |
| H  | 1.859880  | 0.899370  | 1.300660  |
| H  | 3.366530  | 0.622341  | 2.150440  |

|                                                                                                                       |           |           |           |    |           |           |           |
|-----------------------------------------------------------------------------------------------------------------------|-----------|-----------|-----------|----|-----------|-----------|-----------|
| H                                                                                                                     | 5.315531  | -1.536099 | -1.077110 | C  | -5.020962 | 0.236054  | 2.556381  |
| H                                                                                                                     | 4.488581  | -2.282909 | 0.273750  | C  | -5.226828 | -0.160793 | 3.885931  |
| H                                                                                                                     | 6.841371  | -1.664488 | 0.941710  | C  | -5.107447 | -1.514724 | 4.250613  |
| H                                                                                                                     | 6.541121  | 0.016142  | 0.502540  | C  | -4.737164 | -2.473941 | 3.296582  |
| H                                                                                                                     | 5.694651  | -0.702959 | 1.874940  | C  | -4.550879 | -2.092331 | 1.959439  |
| H                                                                                                                     | 1.560671  | -0.994100 | 2.909990  | C  | -2.178713 | 5.638588  | -0.213035 |
| H                                                                                                                     | 2.915571  | -1.862189 | 2.181490  | C  | -4.406999 | 1.895535  | -2.642533 |
| H                                                                                                                     | 1.427531  | -1.612220 | 1.262000  | C  | -1.254828 | 3.858148  | 1.852160  |
| H                                                                                                                     | 5.081480  | 3.486711  | -0.124470 | C  | -1.989832 | 1.072164  | 1.851919  |
| H                                                                                                                     | 3.730720  | 2.869171  | 0.830310  | C  | -6.996480 | 0.481015  | -0.546283 |
| H                                                                                                                     | 5.329450  | 2.149531  | 0.998560  | C  | -8.595892 | 0.037929  | -2.899160 |
| H                                                                                                                     | -3.175180 | 1.200649  | 2.489640  | C  | -7.684589 | -1.819355 | -4.959256 |
| H                                                                                                                     | -2.207110 | 1.894069  | 1.207860  | C  | -4.930936 | -2.739801 | -4.950673 |
| H                                                                                                                     | -2.942939 | -2.199161 | 0.832970  | C  | -3.307772 | -2.423508 | -2.581967 |
| H                                                                                                                     | -4.330919 | -1.771411 | 1.810340  | C  | -4.316922 | -3.186663 | 0.939415  |
| H                                                                                                                     | -5.838620 | 0.575068  | -0.660820 | C  | -4.555624 | -3.917337 | 3.709820  |
| H                                                                                                                     | -5.909600 | 0.838748  | 1.072780  | C  | -5.425968 | -1.939121 | 5.664183  |
| H                                                                                                                     | -4.935588 | -3.496322 | 0.031690  | C  | -5.595757 | 0.860607  | 4.937289  |
| H                                                                                                                     | -5.847929 | -2.002662 | -0.192860 | C  | -5.294369 | 1.689214  | 2.220561  |
| H                                                                                                                     | -4.459829 | -2.343682 | -1.222560 | C  | -3.957502 | 4.697566  | -2.294242 |
| H                                                                                                                     | -6.052770 | 3.034298  | -0.204020 | Si | 4.123954  | -0.146626 | -0.316263 |
| H                                                                                                                     | -4.608390 | 2.992528  | 0.808960  | C  | 4.774670  | 1.569063  | -0.704724 |
| H                                                                                                                     | -4.475710 | 2.700728  | -0.928050 | C  | 3.312075  | -0.320380 | 1.387582  |
| H                                                                                                                     | -0.750990 | 0.660130  | 2.845390  | C  | 5.067021  | -1.619268 | -1.001900 |
| H                                                                                                                     | -0.667639 | -0.129460 | 1.267610  | C  | 6.333688  | -1.812140 | -0.406246 |
| H                                                                                                                     | -1.652659 | -0.828561 | 2.555280  | C  | 7.054785  | -2.996308 | -0.633688 |
| 170                                                                                                                   |           |           |           | C  | 6.542816  | -3.969377 | -1.504128 |
| [Si(C <sub>6</sub> Me <sub>5</sub> ) <sub>3</sub> -Q-Si(C <sub>6</sub> Me <sub>5</sub> ) <sub>3</sub> ] <sup>2+</sup> |           |           |           | C  | 5.272385  | -3.800252 | -2.081869 |
| C                                                                                                                     | -1.004761 | 0.047004  | -1.512307 | C  | 4.550529  | -2.613011 | -1.871186 |
| C                                                                                                                     | 0.284342  | 0.301810  | -1.790391 | C  | 3.601544  | -1.409323 | 2.251101  |
| C                                                                                                                     | 1.359640  | -0.384054 | -1.067173 | C  | 3.250496  | -1.339907 | 3.610262  |
| C                                                                                                                     | 1.032655  | -1.480800 | -0.139025 | C  | 2.482234  | -0.267831 | 4.085268  |
| C                                                                                                                     | -0.256933 | -1.752593 | 0.121001  | C  | 2.108211  | 0.773969  | 3.219382  |
| C                                                                                                                     | -1.330719 | -0.962643 | -0.489056 | C  | 2.527790  | 0.763119  | 1.879025  |
| O                                                                                                                     | -2.495306 | -1.228307 | -0.125453 | C  | 5.182376  | 2.475873  | 0.305147  |
| O                                                                                                                     | 2.525909  | -0.010468 | -1.312490 | C  | 5.483058  | 3.803241  | -0.035484 |
| Si                                                                                                                    | -4.114621 | -0.256615 | -0.149926 | C  | 5.419802  | 4.225569  | -1.376169 |
| C                                                                                                                     | -4.647911 | -0.728048 | 1.586880  | C  | 5.012640  | 3.334402  | -2.379791 |
| C                                                                                                                     | -3.363481 | 1.472587  | -0.313647 | C  | 4.735548  | 1.998224  | -2.054687 |
| C                                                                                                                     | -5.134352 | -0.925394 | -1.578587 | C  | 2.042936  | -0.247692 | 5.529620  |
| C                                                                                                                     | -6.437409 | -0.385101 | -1.654498 | C  | 4.195719  | -2.721613 | 1.772988  |
| C                                                                                                                     | -7.241406 | -0.623919 | -2.782033 | C  | 1.297465  | 1.919114  | 3.786729  |
| C                                                                                                                     | -6.773025 | -1.453745 | -3.810729 | C  | 2.086961  | 1.938130  | 1.016997  |
| C                                                                                                                     | -5.464007 | -1.965724 | -3.763742 | C  | 6.941458  | -0.768827 | 0.506530  |
| C                                                                                                                     | -4.657009 | -1.739152 | -2.636332 | C  | 8.364433  | -3.233901 | 0.083376  |
| C                                                                                                                     | -3.740031 | 2.355422  | -1.359015 | C  | 7.369868  | -5.186937 | -1.845929 |
| C                                                                                                                     | -3.416096 | 3.721059  | -1.274312 | C  | 4.685290  | -4.918848 | -2.915740 |
| C                                                                                                                     | -2.588999 | 4.185777  | -0.242699 | C  | 3.261141  | -2.431307 | -2.644503 |
| C                                                                                                                     | -2.129867 | 3.302611  | 0.749452  | C  | 4.464540  | 1.034430  | -3.190105 |
| C                                                                                                                     | -2.522705 | 1.954293  | 0.731156  | C  | 4.887551  | 3.812722  | -3.808995 |
|                                                                                                                       |           |           |           | C  | 5.836820  | 5.631079  | -1.737440 |

|   |           |           |           |                                                                                                                      |           |           |           |
|---|-----------|-----------|-----------|----------------------------------------------------------------------------------------------------------------------|-----------|-----------|-----------|
| C | 5.894265  | 4.790128  | 1.033079  | H                                                                                                                    | -4.906035 | 4.359304  | -2.710866 |
| C | 5.393034  | 2.070785  | 1.751050  | H                                                                                                                    | 1.123178  | 0.318814  | 5.669429  |
| C | 3.698705  | -2.419697 | 4.569515  | H                                                                                                                    | 2.809335  | 0.210772  | 6.166108  |
| H | -1.815767 | 0.555398  | -2.018787 | H                                                                                                                    | 1.867804  | -1.255624 | 5.907330  |
| H | 0.589237  | 1.035197  | -2.529488 | H                                                                                                                    | 3.755673  | -3.547072 | 2.335658  |
| H | 1.842526  | -2.048379 | 0.302522  | H                                                                                                                    | 5.280661  | -2.782865 | 1.915124  |
| H | -0.562711 | -2.543962 | 0.797101  | H                                                                                                                    | 4.008725  | -2.913606 | 0.717238  |
| H | -1.226852 | 5.784326  | 0.296040  | H                                                                                                                    | 0.276398  | 1.602370  | 4.032466  |
| H | -2.926236 | 6.246387  | 0.310810  | H                                                                                                                    | 1.223795  | 2.766767  | 3.109588  |
| H | -2.077565 | 6.045001  | -1.219927 | H                                                                                                                    | 1.746213  | 2.283589  | 4.714552  |
| H | -4.050059 | 2.502027  | -3.476643 | H                                                                                                                    | 0.992292  | 2.023263  | 1.017943  |
| H | -5.498537 | 1.991533  | -2.622651 | H                                                                                                                    | 2.415912  | 1.896572  | -0.016930 |
| H | -4.186854 | 0.856472  | -2.882858 | H                                                                                                                    | 2.477071  | 2.883471  | 1.408156  |
| H | -1.109614 | 3.160627  | 2.673405  | H                                                                                                                    | 8.029892  | -0.779628 | 0.446763  |
| H | -1.696288 | 4.765893  | 2.271947  | H                                                                                                                    | 6.675250  | -0.934918 | 1.559639  |
| H | -0.262727 | 4.134685  | 1.474595  | H                                                                                                                    | 6.641867  | 0.243092  | 0.231148  |
| H | -0.891264 | 1.077272  | 1.856630  | H                                                                                                                    | 9.209855  | -2.786002 | -0.451976 |
| H | -2.317854 | 0.037756  | 1.814720  | H                                                                                                                    | 8.570148  | -4.298209 | 0.191484  |
| H | -2.310145 | 1.441616  | 2.831528  | H                                                                                                                    | 8.350524  | -2.809473 | 1.088534  |
| H | -8.081654 | 0.398603  | -0.488785 | H                                                                                                                    | 7.155271  | -5.541769 | -2.853979 |
| H | -6.761650 | 1.544016  | -0.695825 | H                                                                                                                    | 7.179002  | -6.015980 | -1.154212 |
| H | -6.625875 | 0.181667  | 0.434795  | H                                                                                                                    | 8.435643  | -4.962858 | -1.806365 |
| H | -9.376756 | -0.534900 | -2.385332 | H                                                                                                                    | 4.923580  | -4.807504 | -3.980239 |
| H | -8.896850 | 0.144159  | -3.940634 | H                                                                                                                    | 3.599776  | -4.966284 | -2.821134 |
| H | -8.586460 | 1.040426  | -2.468290 | H                                                                                                                    | 5.069932  | -5.886692 | -2.595336 |
| H | -7.456402 | -2.813193 | -5.344564 | H                                                                                                                    | 3.126596  | -1.400574 | -2.970439 |
| H | -7.595546 | -1.111484 | -5.791810 | H                                                                                                                    | 2.369689  | -2.729049 | -2.069702 |
| H | -8.728118 | -1.830681 | -4.645546 | H                                                                                                                    | 3.262981  | -3.039465 | -3.547539 |
| H | -5.068813 | -3.821192 | -4.833605 | H                                                                                                                    | 3.432251  | 1.094226  | -3.556851 |
| H | -3.867532 | -2.554452 | -5.107501 | H                                                                                                                    | 4.674575  | 0.001748  | -2.909424 |
| H | -5.436733 | -2.444041 | -5.869001 | H                                                                                                                    | 5.118151  | 1.254029  | -4.036453 |
| H | -3.105201 | -2.830979 | -1.590941 | H                                                                                                                    | 4.164307  | 3.222317  | -4.372028 |
| H | -2.478592 | -1.750863 | -2.852466 | H                                                                                                                    | 5.844163  | 3.756741  | -4.341771 |
| H | -3.264965 | -3.263316 | -3.272384 | H                                                                                                                    | 4.553058  | 4.850187  | -3.847366 |
| H | -3.281089 | -3.547988 | 0.939143  | H                                                                                                                    | 5.000855  | 6.335024  | -1.644759 |
| H | -4.573710 | -2.870682 | -0.072024 | H                                                                                                                    | 6.205232  | 5.689781  | -2.761093 |
| H | -4.954574 | -4.045832 | 1.157133  | H                                                                                                                    | 6.635691  | 5.986047  | -1.085688 |
| H | -3.863636 | -4.443749 | 3.052099  | H                                                                                                                    | 5.546009  | 5.796139  | 0.795737  |
| H | -5.504568 | -4.466325 | 3.695388  | H                                                                                                                    | 6.985194  | 4.838167  | 1.135021  |
| H | -4.153472 | -3.988023 | 4.721284  | H                                                                                                                    | 5.488362  | 4.529757  | 2.010094  |
| H | -4.547501 | -1.858628 | 6.316001  | H                                                                                                                    | 4.663468  | 2.539428  | 2.421308  |
| H | -5.772742 | -2.971206 | 5.704692  | H                                                                                                                    | 6.384773  | 2.393285  | 2.082165  |
| H | -6.210663 | -1.317518 | 6.096310  | H                                                                                                                    | 5.329967  | 0.998829  | 1.919400  |
| H | -5.181297 | 0.592884  | 5.910015  | H                                                                                                                    | 2.945716  | -3.208973 | 4.684284  |
| H | -6.683252 | 0.938289  | 5.056251  | H                                                                                                                    | 3.887406  | -2.004204 | 5.559875  |
| H | -5.224602 | 1.854835  | 4.690295  | H                                                                                                                    | 4.623644  | -2.892595 | 4.240101  |
| H | -5.315684 | 1.895593  | 1.153605  |                                                                                                                      |           |           |           |
| H | -6.267076 | 1.982639  | 2.626509  |                                                                                                                      |           |           |           |
| H | -4.548456 | 2.362352  | 2.658329  |                                                                                                                      |           |           |           |
| H | -3.263649 | 4.849448  | -3.130014 |                                                                                                                      |           |           |           |
| H | -4.137419 | 5.672301  | -1.839784 |                                                                                                                      |           |           |           |
|   |           |           |           | 170                                                                                                                  |           |           |           |
|   |           |           |           | [Si(C <sub>6</sub> Me <sub>5</sub> ) <sub>3</sub> -Q-Si(C <sub>6</sub> Me <sub>5</sub> ) <sub>3</sub> ] <sup>+</sup> |           |           |           |
|   |           |           |           | C                                                                                                                    | -0.81572  | 0.79408   | -2.04884  |
|   |           |           |           | C                                                                                                                    | 0.54417   | 0.85424   | -2.06468  |

|    |          |          |          |   |          |          |          |
|----|----------|----------|----------|---|----------|----------|----------|
| C  | 1.31237  | 0.10664  | -1.11189 | C | 2.98840  | -2.84338 | 3.26411  |
| C  | 0.63813  | -0.77460 | -0.21039 | C | 3.06074  | -3.25092 | 1.92055  |
| C  | -0.72480 | -0.86689 | -0.22320 | C | 3.33312  | -2.31402 | 0.91248  |
| C  | -1.49885 | -0.02850 | -1.09409 | C | 6.22183  | -1.45728 | -0.98001 |
| O  | -2.79374 | 0.04551  | -1.08520 | C | 6.94301  | -2.18432 | -1.93910 |
| O  | 2.59584  | 0.28280  | -1.13371 | C | 6.78787  | -1.89375 | -3.30361 |
| Si | -4.17280 | -0.15313 | 0.00818  | C | 5.88988  | -0.89763 | -3.71340 |
| C  | -5.21246 | -1.40583 | -0.94527 | C | 5.16524  | -0.16637 | -2.75734 |
| C  | -3.31221 | -0.65663 | 1.61309  | C | 2.65082  | -3.87248 | 4.31875  |
| C  | -4.90192 | 1.58423  | -0.04398 | C | 4.22981  | 0.73499  | 3.07200  |
| C  | -4.97570 | 2.27169  | -1.27517 | C | 2.81923  | -4.70009 | 1.56198  |
| C  | -5.35635 | 3.62482  | -1.30224 | C | 3.25885  | -2.80619 | -0.52148 |
| C  | -5.71350 | 4.27926  | -0.11512 | C | 6.76727  | 1.98694  | -0.32678 |
| C  | -5.64894 | 3.59940  | 1.11160  | C | 6.78145  | 4.84882  | -0.59223 |
| C  | -5.28440 | 2.24588  | 1.14450  | C | 4.46522  | 6.40510  | 0.23297  |
| C  | -2.23178 | 0.12131  | 2.09229  | C | 1.96128  | 5.06941  | 0.87311  |
| C  | -1.35576 | -0.41572 | 3.04925  | C | 1.85860  | 2.19718  | 1.04447  |
| C  | -1.52923 | -1.73508 | 3.49741  | C | 4.33807  | 1.00849  | -3.24366 |
| C  | -2.64081 | -2.48685 | 3.08449  | C | 5.70410  | -0.61414 | -5.18781 |
| C  | -3.56526 | -1.92260 | 2.18722  | C | 7.62766  | -2.62122 | -4.32883 |
| C  | -6.59504 | -1.17760 | -1.11688 | C | 7.88848  | -3.28295 | -1.50591 |
| C  | -7.30941 | -1.88967 | -2.09303 | C | 6.55284  | -1.69948 | 0.48034  |
| C  | -6.66913 | -2.88367 | -2.84888 | C | 3.13324  | -1.04898 | 5.04415  |
| C  | -5.30476 | -3.14616 | -2.65533 | H | -1.42443 | 1.38524  | -2.72356 |
| C  | -4.58792 | -2.43330 | -1.68307 | H | 1.08608  | 1.49587  | -2.75107 |
| C  | -0.50898 | -2.30698 | 4.45149  | H | 1.21804  | -1.36297 | 0.49075  |
| C  | -1.95015 | 1.52261  | 1.58539  | H | -1.22360 | -1.54481 | 0.45650  |
| C  | -2.82575 | -3.89514 | 3.60650  | H | -0.56983 | -1.81571 | 5.42990  |
| C  | -4.84953 | -2.67228 | 1.89246  | H | -0.63617 | -3.37514 | 4.61672  |
| C  | -4.72923 | 1.58822  | -2.60634 | H | 0.50425  | -2.14128 | 4.06970  |
| C  | -5.38386 | 4.38174  | -2.61193 | H | -2.59943 | 1.83285  | 0.76842  |
| C  | -6.20930 | 5.70686  | -0.16017 | H | -2.09152 | 2.25598  | 2.38727  |
| C  | -5.97304 | 4.33064  | 2.39581  | H | -0.91217 | 1.61451  | 1.24725  |
| C  | -5.38514 | 1.52306  | 2.47363  | H | -1.93186 | -4.49727 | 3.42159  |
| C  | -3.16515 | -2.85356 | -1.38596 | H | -3.00360 | -3.90396 | 4.68692  |
| C  | -4.61049 | -4.19183 | -3.49968 | H | -3.65617 | -4.40974 | 3.12820  |
| C  | -7.46222 | -3.70302 | -3.84099 | H | -5.24828 | -3.10556 | 2.81212  |
| C  | -8.77011 | -1.58251 | -2.33753 | H | -5.62158 | -2.01497 | 1.49387  |
| C  | -7.36704 | -0.23293 | -0.21881 | H | -4.71603 | -3.48603 | 1.16999  |
| C  | -0.16699 | 0.36825  | 3.55644  | H | -4.71890 | 0.50207  | -2.53841 |
| Si | 4.05874  | 0.23147  | -0.14941 | H | -5.52092 | 1.85509  | -3.31178 |
| C  | 5.28385  | -0.48399 | -1.38733 | H | -3.78111 | 1.90256  | -3.05803 |
| C  | 3.66243  | -0.97801 | 1.25402  | H | -4.68311 | 3.96482  | -3.33533 |
| C  | 4.25956  | 2.08094  | 0.18690  | H | -6.37907 | 4.36146  | -3.07280 |
| C  | 5.47073  | 2.74092  | -0.11626 | H | -5.11285 | 5.42879  | -2.46802 |
| C  | 5.51374  | 4.14435  | -0.16222 | H | -6.72017 | 5.92081  | -1.09948 |
| C  | 4.38250  | 4.89658  | 0.18668  | H | -6.91757 | 5.90762  | 0.64419  |
| C  | 3.18564  | 4.24979  | 0.52973  | H | -5.38650 | 6.42551  | -0.06172 |
| C  | 3.13145  | 2.84896  | 0.54976  | H | -5.68557 | 5.38120  | 2.33408  |
| C  | 3.69252  | -0.60678 | 2.61607  | H | -7.04475 | 4.29679  | 2.62728  |
| C  | 3.26626  | -1.51189 | 3.60866  | H | -5.44174 | 3.90259  | 3.24650  |

|   |          |          |          |                                                                                                      |          |          |          |
|---|----------|----------|----------|------------------------------------------------------------------------------------------------------|----------|----------|----------|
| H | -4.52382 | 1.71641  | 3.12447  | H                                                                                                    | 5.79127  | -1.52815 | -5.77743 |
| H | -6.28018 | 1.84623  | 3.01069  | H                                                                                                    | 4.72158  | -0.19041 | -5.39646 |
| H | -5.45543 | 0.44076  | 2.36394  | H                                                                                                    | 6.45355  | 0.09207  | -5.56576 |
| H | -3.07987 | -3.94295 | -1.39858 | H                                                                                                    | 8.59279  | -2.91634 | -3.91593 |
| H | -2.44077 | -2.46318 | -2.11131 | H                                                                                                    | 7.13051  | -3.53103 | -4.68681 |
| H | -2.86305 | -2.53153 | -0.38807 | H                                                                                                    | 7.82800  | -1.99391 | -5.19788 |
| H | -5.00379 | -4.19732 | -4.51766 | H                                                                                                    | 7.59271  | -3.71572 | -0.54973 |
| H | -3.53865 | -4.00570 | -3.57277 | H                                                                                                    | 7.90783  | -4.09539 | -2.23397 |
| H | -4.74381 | -5.20159 | -3.09250 | H                                                                                                    | 8.91673  | -2.91697 | -1.39624 |
| H | -8.49700 | -3.82415 | -3.51852 | H                                                                                                    | 6.20937  | -0.89407 | 1.13145  |
| H | -7.47938 | -3.23147 | -4.83109 | H                                                                                                    | 6.11268  | -2.62561 | 0.86889  |
| H | -7.04276 | -4.70226 | -3.96057 | H                                                                                                    | 7.63637  | -1.76985 | 0.60815  |
| H | -9.01154 | -0.55059 | -2.08138 | H                                                                                                    | 3.98593  | -1.36131 | 5.65784  |
| H | -9.03044 | -1.72148 | -3.38783 | H                                                                                                    | 3.05424  | 0.03537  | 5.11307  |
| H | -9.42852 | -2.23173 | -1.74739 | H                                                                                                    | 2.23288  | -1.45854 | 5.50795  |
| H | -6.84960 | -0.04610 | 0.72329  |                                                                                                      |          |          |          |
| H | -7.54765 | 0.74264  | -0.68405 |                                                                                                      |          |          |          |
| H | -8.33612 | -0.66807 | 0.03655  | 170                                                                                                  |          |          |          |
| H | -0.26206 | 1.43787  | 3.37495  | Si(C <sub>6</sub> Me <sub>5</sub> ) <sub>3</sub> -Q-Si(C <sub>6</sub> Me <sub>5</sub> ) <sub>3</sub> |          |          |          |
| H | -0.02945 | 0.22897  | 4.63205  | C                                                                                                    | -0.62574 | 0.48670  | -0.29813 |
| H | 0.76204  | 0.02680  | 3.07373  | C                                                                                                    | 0.68763  | 0.23376  | -0.15417 |
| H | 2.44660  | -3.42906 | 5.29130  | C                                                                                                    | 1.40441  | -0.51480 | -1.19441 |
| H | 1.77789  | -4.46535 | 4.03141  | C                                                                                                    | 0.72569  | -0.86776 | -2.45105 |
| H | 3.48468  | -4.57070 | 4.45147  | C                                                                                                    | -0.56749 | -0.56087 | -2.61965 |
| H | 4.90270  | 1.17952  | 2.34132  | C                                                                                                    | -1.32546 | 0.03561  | -1.50797 |
| H | 3.43363  | 1.46568  | 3.26263  | O                                                                                                    | -2.56243 | 0.11038  | -1.65698 |
| H | 4.79478  | 0.61993  | 3.99899  | O                                                                                                    | 2.58522  | -0.89764 | -1.06898 |
| H | 3.09889  | -5.36674 | 2.37760  | Si                                                                                                   | -3.97757 | 0.04547  | -0.40214 |
| H | 1.76217  | -4.88933 | 1.33534  | C                                                                                                    | -4.99675 | -1.20097 | -1.36674 |
| H | 3.39656  | -4.99975 | 0.68664  | C                                                                                                    | -3.01719 | -0.68489 | 1.05572  |
| H | 2.38204  | -3.44521 | -0.66158 | C                                                                                                    | -4.65355 | 1.78581  | -0.22194 |
| H | 3.20408  | -2.00813 | -1.25910 | C                                                                                                    | -5.80462 | 1.87196  | 0.59283  |
| H | 4.14236  | -3.40183 | -0.78084 | C                                                                                                    | -6.30381 | 3.12467  | 0.98649  |
| H | 6.75516  | 1.01122  | 0.15760  | C                                                                                                    | -5.69278 | 4.29724  | 0.51945  |
| H | 6.99163  | 1.81803  | -1.38621 | C                                                                                                    | -4.52404 | 4.22274  | -0.25931 |
| H | 7.59983  | 2.54443  | 0.10707  | C                                                                                                    | -4.02353 | 2.97481  | -0.66517 |
| H | 7.36453  | 4.23687  | -1.28104 | C                                                                                                    | -3.05383 | -0.07344 | 2.33683  |
| H | 6.55611  | 5.78403  | -1.10646 | C                                                                                                    | -2.76491 | -0.83513 | 3.47996  |
| H | 7.42630  | 5.09002  | 0.26170  | C                                                                                                    | -2.27955 | -2.14900 | 3.35738  |
| H | 5.46688  | 6.73964  | 0.50498  | C                                                                                                    | -2.03733 | -2.68963 | 2.08232  |
| H | 4.22142  | 6.85260  | -0.73828 | C                                                                                                    | -2.45427 | -1.98467 | 0.93717  |
| H | 3.77583  | 6.82098  | 0.96820  | C                                                                                                    | -5.48043 | -2.40495 | -0.79362 |
| H | 1.90278  | 5.96577  | 0.25311  | C                                                                                                    | -6.06345 | -3.37893 | -1.61705 |
| H | 1.03823  | 4.51094  | 0.71583  | C                                                                                                    | -6.20857 | -3.14940 | -2.99863 |
| H | 1.97267  | 5.39739  | 1.91975  | C                                                                                                    | -5.73271 | -1.96087 | -3.57278 |
| H | 1.51471  | 2.68295  | 1.96325  | C                                                                                                    | -5.16967 | -0.96962 | -2.75639 |
| H | 1.04089  | 2.28153  | 0.31737  | C                                                                                                    | -2.02843 | -2.94331 | 4.61674  |
| H | 1.99298  | 1.13963  | 1.28510  | C                                                                                                    | -3.31220 | 1.40685  | 2.54504  |
| H | 4.89190  | 1.55945  | -4.00802 | C                                                                                                    | -1.41803 | -4.06358 | 1.93672  |
| H | 3.39110  | 0.68896  | -3.69469 | C                                                                                                    | -2.26444 | -2.69418 | -0.39316 |
| H | 4.10802  | 1.71452  | -2.44516 | C                                                                                                    | -6.51469 | 0.62869  | 1.08403  |
|   |          |          |          | C                                                                                                    | -7.47802 | 3.20742  | 1.93574  |

|    |          |          |          |   |          |          |          |
|----|----------|----------|----------|---|----------|----------|----------|
| C  | -6.30576 | 5.64289  | 0.83125  | H | -4.34054 | 1.63165  | 2.84962  |
| C  | -3.80364 | 5.50033  | -0.63466 | H | -3.11354 | 1.99908  | 1.65252  |
| C  | -2.84120 | 2.95778  | -1.61147 | H | -0.89670 | -4.18147 | 0.98699  |
| C  | -4.82694 | 0.35964  | -3.39455 | H | -2.18031 | -4.85041 | 1.98881  |
| C  | -5.84254 | -1.74853 | -5.06595 | H | -0.69033 | -4.26671 | 2.72270  |
| C  | -6.92052 | -4.16857 | -3.85437 | H | -1.19314 | -2.79443 | -0.61910 |
| C  | -6.55826 | -4.67996 | -1.02826 | H | -2.74892 | -2.21243 | -1.23858 |
| C  | -5.48158 | -2.67567 | 0.69840  | H | -2.66823 | -3.71015 | -0.35786 |
| C  | -2.95780 | -0.23864 | 4.85539  | H | -7.57859 | 0.81269  | 1.23273  |
| Si | 3.99906  | -0.19485 | -0.01927 | H | -6.11023 | 0.27518  | 2.04287  |
| C  | 5.41479  | -0.69034 | -1.13919 | H | -6.45564 | -0.18898 | 0.36416  |
| C  | 3.44761  | 1.61245  | -0.18607 | H | -8.43632 | 3.14464  | 1.40702  |
| C  | 3.86515  | -0.99844 | 1.67466  | H | -7.47113 | 4.14240  | 2.49471  |
| C  | 4.86148  | -0.55864 | 2.57880  | H | -7.45390 | 2.39954  | 2.66890  |
| C  | 4.73979  | -0.80619 | 3.95436  | H | -6.11742 | 6.35830  | 0.03063  |
| C  | 3.64650  | -1.54156 | 4.43746  | H | -5.90503 | 6.06881  | 1.75873  |
| C  | 2.65232  | -1.98176 | 3.54958  | H | -7.38707 | 5.56687  | 0.94325  |
| C  | 2.77855  | -1.76257 | 2.16689  | H | -4.11737 | 5.87757  | -1.61517 |
| C  | 3.20109  | 2.45598  | 0.92834  | H | -2.72240 | 5.35887  | -0.66286 |
| C  | 3.08173  | 3.84569  | 0.74722  | H | -3.99694 | 6.28664  | 0.09422  |
| C  | 3.07520  | 4.39337  | -0.54371 | H | -2.95725 | 2.19813  | -2.38468 |
| C  | 3.27511  | 3.56529  | -1.65966 | H | -1.88464 | 2.78076  | -1.09671 |
| C  | 3.45640  | 2.18209  | -1.49159 | H | -2.74282 | 3.90818  | -2.13246 |
| C  | 6.38525  | 0.23723  | -1.59060 | H | -3.87731 | 0.33167  | -3.94305 |
| C  | 7.30771  | -0.15023 | -2.57506 | H | -4.78232 | 1.16895  | -2.66520 |
| C  | 7.29368  | -1.46046 | -3.08657 | H | -5.60094 | 0.64266  | -4.11074 |
| C  | 6.32924  | -2.38067 | -2.64949 | H | -5.08182 | -1.06067 | -5.43538 |
| C  | 5.42313  | -2.01344 | -1.64423 | H | -6.82020 | -1.33957 | -5.34691 |
| C  | 2.81849  | 5.87002  | -0.73562 | H | -5.71465 | -2.68781 | -5.60554 |
| C  | 2.96002  | 1.94313  | 2.33683  | H | -6.22878 | -4.93646 | -4.22181 |
| C  | 3.32662  | 4.17841  | -3.04201 | H | -7.39068 | -3.70650 | -4.72179 |
| C  | 3.64059  | 1.38392  | -2.77280 | H | -7.70469 | -4.67784 | -3.29353 |
| C  | 6.07312  | 0.20991  | 2.09683  | H | -6.42826 | -5.50438 | -1.73047 |
| C  | 5.76481  | -0.24845 | 4.91566  | H | -7.62545 | -4.62703 | -0.78100 |
| C  | 3.56486  | -1.89697 | 5.90407  | H | -6.02614 | -4.94640 | -0.11575 |
| C  | 1.42451  | -2.68622 | 4.08304  | H | -5.20382 | -1.81480 | 1.30148  |
| C  | 1.76517  | -2.46488 | 1.28211  | H | -6.48353 | -2.98261 | 1.01298  |
| C  | 4.50755  | -3.08011 | -1.08363 | H | -4.79806 | -3.48835 | 0.96988  |
| C  | 6.27731  | -3.76508 | -3.25581 | H | -2.02879 | 0.20361  | 5.23604  |
| C  | 8.34784  | -1.88673 | -4.07998 | H | -3.27018 | -0.99613 | 5.57421  |
| C  | 8.33349  | 0.83389  | -3.08902 | H | -3.71882 | 0.54127  | 4.85839  |
| C  | 6.53519  | 1.63172  | -1.01500 | H | 2.26513  | 6.05983  | -1.65586 |
| C  | 2.96340  | 4.76038  | 1.94685  | H | 3.75569  | 6.43599  | -0.79344 |
| H  | -1.19516 | 1.00398  | 0.46426  | H | 2.23457  | 6.28587  | 0.08492  |
| H  | 1.23389  | 0.52979  | 0.73433  | H | 2.18556  | 2.54523  | 2.81679  |
| H  | 1.32415  | -1.36696 | -3.20624 | H | 3.85020  | 2.01027  | 2.97299  |
| H  | -1.12507 | -0.79988 | -3.51945 | H | 2.63235  | 0.90572  | 2.37138  |
| H  | -1.55357 | -3.90389 | 4.43207  | H | 2.34263  | 4.17302  | -3.52719 |
| H  | -2.97654 | -3.14679 | 5.12561  | H | 4.01322  | 3.64526  | -3.69938 |
| H  | -1.40320 | -2.38608 | 5.32023  | H | 3.66503  | 5.21316  | -3.00431 |
| H  | -2.65768 | 1.77771  | 3.33693  | H | 2.84660  | 1.63672  | -3.48397 |



|   |         |          |          |   |           |           |           |
|---|---------|----------|----------|---|-----------|-----------|-----------|
| H | 3.65415 | 0.30520  | -2.64861 | C | -4.529197 | 3.179798  | -2.962056 |
| H | 4.58870 | 1.63306  | -3.26111 | C | -3.437313 | 3.257301  | -2.112381 |
| H | 6.94588 | -0.01166 | 2.71189  | C | -3.193261 | 2.219394  | -1.219420 |
| H | 5.91827 | 1.29672  | 2.13813  | C | -3.660257 | -2.005835 | -1.945026 |
| H | 6.35423 | -0.06031 | 1.07812  | C | -3.597827 | -3.325241 | -2.377673 |
| H | 6.63317 | -0.91035 | 5.01391  | C | -3.688493 | -4.349085 | -1.446855 |
| H | 5.34344 | -0.10837 | 5.91043  | C | -3.825107 | -4.038559 | -0.099617 |
| H | 6.13119 | 0.72509  | 4.58570  | C | -3.877749 | -2.707359 | 0.284819  |
| H | 3.03106 | -2.83452 | 6.05869  | C | -6.189880 | -0.576664 | 1.262113  |
| H | 3.05165 | -1.12040 | 6.48350  | C | -7.156998 | -0.233716 | 2.200187  |
| H | 4.55893 | -2.02330 | 6.33291  | C | -6.981323 | 0.897514  | 2.983923  |
| H | 1.54175 | -3.77778 | 4.08966  | C | -5.844146 | 1.676925  | 2.818225  |
| H | 0.54243 | -2.44850 | 3.48242  | C | -4.907435 | 1.301757  | 1.867129  |
| H | 1.20722 | -2.37621 | 5.10551  | F | -5.893846 | -0.001639 | -1.975855 |
| H | 2.13663 | -2.63756 | 0.27493  | F | -6.407366 | 1.980360  | -3.721080 |
| H | 0.79569 | -1.94378 | 1.22348  | F | -4.780651 | 4.159623  | -3.820528 |
| H | 1.54505 | -3.45134 | 1.69668  | F | -2.633103 | 4.316454  | -2.150629 |
| H | 3.61715 | -3.24078 | -1.70475 | F | -2.107321 | 2.370645  | -0.429497 |
| H | 4.18674 | -2.84613 | -0.06735 | F | -3.509009 | -1.069149 | -2.899436 |
| H | 5.03036 | -4.03615 | -1.02000 | F | -6.427929 | -1.674115 | 0.536793  |
| H | 5.27656 | -4.19429 | -3.20018 | F | -8.247686 | -0.980005 | 2.350759  |
| H | 6.96218 | -4.45690 | -2.75138 | F | -7.896174 | 1.235213  | 3.884850  |
| H | 6.55593 | -3.74087 | -4.31004 | F | -5.669141 | 2.769545  | 3.557847  |
| H | 8.04683 | -1.65503 | -5.10884 | F | -3.835795 | 2.099681  | 1.716742  |
| H | 8.54027 | -2.95782 | -4.02591 | F | -3.996923 | -2.460440 | 1.594335  |
| H | 9.29440 | -1.37828 | -3.89458 | F | -3.896540 | -5.012202 | 0.801804  |
| H | 8.55093 | 0.66115  | -4.14378 | F | -3.627155 | -5.614426 | -1.837407 |
| H | 9.28012 | 0.74728  | -2.54203 | F | -3.439290 | -3.607623 | -3.667465 |
| H | 7.99659 | 1.86556  | -2.99400 | O | 2.518357  | -0.020754 | -0.795205 |
| H | 6.28026 | 2.40756  | -1.74601 | B | 3.903346  | 0.122094  | 0.048509  |
| H | 7.57535 | 1.79915  | -0.71979 | C | 3.980857  | -1.078827 | 1.139752  |
| H | 5.91751 | 1.81315  | -0.13945 | C | 3.815673  | 1.640760  | 0.611750  |
| H | 1.91885 | 4.95955  | 2.21625  | C | 5.029136  | -0.165033 | -1.072176 |
| H | 3.43762 | 5.72197  | 1.74897  | C | 5.071580  | -1.054071 | 2.007411  |
| H | 3.45452 | 4.33943  | 2.82392  | C | 5.356869  | -2.063534 | 2.911995  |

80

B(C<sub>6</sub>F<sub>5</sub>)<sub>3</sub>-Q-B(C<sub>6</sub>F<sub>5</sub>)<sub>3</sub>

|   |           |           |           |   |          |           |           |
|---|-----------|-----------|-----------|---|----------|-----------|-----------|
| C | -0.998619 | -0.129137 | -1.049523 | C | 4.529000 | -3.179722 | 2.962163  |
| C | 0.294219  | -0.155540 | -1.390892 | C | 3.437125 | -3.257202 | 2.112473  |
| C | 1.354918  | -0.018839 | -0.374975 | C | 3.193136 | -2.219314 | 1.219473  |
| C | 0.998609  | 0.129296  | 1.049499  | C | 3.877895 | 2.707365  | -0.284903 |
| C | -0.294228 | 0.155697  | 1.390867  | C | 3.825326 | 4.038580  | 0.099495  |
| C | -1.354926 | 0.018964  | 0.374954  | C | 3.688715 | 4.349153  | 1.446722  |
| O | -2.518362 | 0.020819  | 0.795190  | C | 3.597981 | 3.325341  | 2.377570  |
| B | -3.903346 | -0.122080 | -0.048516 | C | 3.660339 | 2.005919  | 1.944961  |
| C | -3.980929 | 1.078868  | -1.139723 | C | 4.907378 | -1.301840 | -1.867099 |
| C | -3.815598 | -1.640724 | -0.611803 | C | 5.844080 | -1.677077 | -2.818176 |
| C | -5.029140 | 0.164958  | 1.072186  | C | 6.981302 | -0.897732 | -2.983874 |
| C | -5.071663 | 1.054089  | -2.007367 | C | 7.157028 | 0.233505  | -2.200159 |
| C | -5.357013 | 2.063569  | -2.911914 | C | 6.189919 | 0.576524  | -1.262102 |
|   |           |           |           | F | 5.893814 | 0.001617  | 1.975876  |
|   |           |           |           | F | 6.407214 | -1.980349 | 3.721175  |
|   |           |           |           | F | 4.780394 | -4.159530 | 3.820671  |

F 2.632863 -4.316317 2.150745  
 F 2.107201 -2.370541 0.429538  
 F 3.997072 2.460401 -1.594409  
 F 3.835692 -2.099702 -1.716711  
 F 5.669026 -2.769702 -3.557779  
 F 7.896147 -1.235498 -3.884782  
 F 8.247760 0.979731 -2.350732  
 F 6.428017 1.673976 -0.536802  
 F 3.509028 1.069269 2.899398  
 F 3.439447 3.607770 3.667351  
 F 3.627448 5.614509 1.837236  
 F 3.896826 5.012191 -0.801954  
 H -1.792852 -0.207989 -1.784071  
 H 0.631837 -0.264551 -2.415826  
 H 1.792842 0.208163 1.784045  
 H -0.631847 0.264717 2.415800

80

[B(C<sub>6</sub>F<sub>5</sub>)<sub>3</sub>-Q-B(C<sub>6</sub>F<sub>5</sub>)<sub>3</sub>]<sup>-</sup>

C 1.002084 -0.055874 1.003765  
 C -0.312832 -0.090274 1.360425  
 C -1.356310 -0.031857 0.381247  
 C -1.002083 0.055891 -1.003766  
 C 0.312833 0.090291 -1.360427  
 C 1.356311 0.031873 -0.381249  
 O 2.568882 0.066211 -0.827027  
 B 3.839959 -0.123759 -0.008038  
 C 4.073287 1.083837 1.072951  
 C 3.735935 -1.629730 0.631989  
 C 5.054157 0.053106 -1.092113  
 C 5.177935 0.998726 1.916875  
 C 5.559924 2.002100 2.791716  
 C 4.822294 3.178710 2.829625  
 C 3.725710 3.321283 1.996398  
 C 3.378590 2.285209 1.132565  
 C 3.598079 -1.953447 1.975631  
 C 3.474265 -3.256399 2.446254  
 C 3.481839 -4.307697 1.544936  
 C 3.603834 -4.039030 0.188725  
 C 3.720059 -2.722878 -0.232234  
 C 6.172708 -0.762091 -1.220314  
 C 7.194223 -0.514515 -2.131277  
 C 7.124893 0.599194 -2.952490  
 C 6.038407 1.454926 -2.846735  
 C 5.042314 1.172572 -1.921868  
 F 5.928423 -0.113308 1.896147  
 F 6.623741 1.859720 3.585349  
 F 5.170398 4.161583 3.660516  
 F 3.016558 4.451364 2.021230  
 F 2.311976 2.509980 0.351473  
 F 3.533748 -0.992295 2.915142

F 6.328096 -1.852428 -0.457885  
 F 8.242232 -1.337613 -2.219710  
 F 8.096886 0.850891 -3.830438  
 F 5.970926 2.541477 -3.620165  
 F 4.042600 2.061289 -1.832129  
 F 3.843417 -2.526345 -1.551424  
 F 3.610700 -5.044458 -0.688039  
 F 3.365734 -5.563556 1.973628  
 F 3.339396 -3.499141 3.751769  
 O -2.568881 -0.066198 0.827026  
 B -3.839959 0.123764 0.008037  
 C -4.073281 -1.083834 -1.072950  
 C -3.735944 1.629735 -0.631991  
 C -5.054155 -0.053108 1.092113  
 C -5.177930 -0.998731 -1.916873  
 C -5.559914 -2.002108 -2.791712  
 C -4.822278 -3.178714 -2.829621  
 C -3.725691 -3.321279 -1.996395  
 C -3.378576 -2.285202 -1.132564  
 C -3.720074 2.722883 0.232231  
 C -3.603857 4.039036 -0.188729  
 C -3.481861 4.307703 -1.544940  
 C -3.474282 3.256405 -2.446257  
 C -3.598088 1.953452 -1.975633  
 C -5.042305 -1.172575 1.921867  
 C -6.038396 -1.454935 2.846734  
 C -7.124888 -0.599209 2.952491  
 C -7.194224 0.514500 2.131278  
 C -6.172710 0.762082 1.220315  
 F -5.928425 0.113298 -1.896145  
 F -6.623734 -1.859736 -3.585344  
 F -5.170377 -4.161591 -3.660509  
 F -3.016532 -4.451356 -2.021225  
 F -2.311961 -2.509965 -0.351472  
 F -3.843432 2.526351 1.551421  
 F -4.042586 -2.061284 1.832128  
 F -5.970909 -2.541485 3.620164  
 F -8.096879 -0.850913 3.830438  
 F -8.242238 1.337592 2.219712  
 F -6.328105 1.852419 0.457887  
 F -3.533751 0.992299 -2.915143  
 F -3.339413 3.499146 -3.751772  
 F -3.365763 5.563562 -1.973632  
 F -3.610728 5.044465 0.688035  
 H 1.780382 -0.079722 1.757371  
 H -0.619582 -0.152496 2.398449  
 H -1.780381 0.079740 -1.757373  
 H 0.619583 0.152514 -2.398451

80

[B(C<sub>6</sub>F<sub>5</sub>)<sub>3</sub>-Q-B(C<sub>6</sub>F<sub>5</sub>)<sub>3</sub>]<sup>2-</sup>

|   |           |           |           |                                                                                                       |           |           |           |
|---|-----------|-----------|-----------|-------------------------------------------------------------------------------------------------------|-----------|-----------|-----------|
| C | -1.002684 | -0.082727 | 0.963422  | C                                                                                                     | 3.590894  | -2.730930 | 0.147460  |
| C | 0.336225  | -0.025941 | 1.337843  | C                                                                                                     | 3.401180  | -4.022577 | -0.321036 |
| C | 1.359947  | 0.056561  | 0.390225  | C                                                                                                     | 3.267656  | -4.235907 | -1.684904 |
| C | 1.002680  | 0.082694  | -0.963419 | C                                                                                                     | 3.327928  | -3.154286 | -2.545304 |
| C | -0.336229 | 0.025906  | -1.337840 | C                                                                                                     | 3.524090  | -1.878047 | -2.026624 |
| C | -1.359951 | -0.056595 | -0.390222 | C                                                                                                     | 5.174752  | 1.041532  | 1.959747  |
| O | -2.631227 | -0.124324 | -0.853982 | C                                                                                                     | 6.199278  | 1.228025  | 2.880021  |
| B | -3.816930 | 0.123121  | -0.044154 | C                                                                                                     | 7.221824  | 0.295714  | 2.958061  |
| C | -4.191356 | -1.086450 | 1.027005  | C                                                                                                     | 7.201981  | -0.798000 | 2.110175  |
| C | -3.673357 | 1.608708  | 0.673345  | C                                                                                                     | 6.156223  | -0.947595 | 1.204072  |
| C | -5.093470 | 0.057307  | -1.104407 | F                                                                                                     | 5.985750  | -0.209832 | -1.849243 |
| C | -5.304845 | -0.950337 | 1.850168  | F                                                                                                     | 6.853131  | 1.753117  | -3.467559 |
| C | -5.777618 | -1.946040 | 2.689635  | F                                                                                                     | 5.562999  | 4.154383  | -3.507700 |
| C | -5.125129 | -3.170830 | 2.710053  | F                                                                                                     | 3.400775  | 4.551609  | -1.906655 |
| C | -4.023002 | -3.366087 | 1.895811  | F                                                                                                     | 2.524153  | 2.619561  | -0.304552 |
| C | -3.581096 | -2.334957 | 1.067190  | F                                                                                                     | 3.739211  | -2.601927 | 1.473591  |
| C | -3.524065 | 1.878051  | 2.026605  | F                                                                                                     | 4.258842  | 2.014835  | 1.904256  |
| C | -3.327883 | 3.154292  | 2.545273  | F                                                                                                     | 6.224603  | 2.303348  | 3.679587  |
| C | -3.267596 | 4.235904  | 1.684861  | F                                                                                                     | 8.222298  | 0.457145  | 3.834646  |
| C | -3.401129 | 4.022562  | 0.320996  | F                                                                                                     | 8.194543  | -1.697888 | 2.168815  |
| C | -3.590863 | 2.730913  | -0.147486 | F                                                                                                     | 6.240942  | -2.029410 | 0.414828  |
| C | -6.156213 | 0.947597  | -1.204075 | F                                                                                                     | 3.543559  | -0.889735 | -2.939876 |
| C | -7.201976 | 0.798006  | -2.110174 | F                                                                                                     | 3.195164  | -3.346759 | -3.864547 |
| C | -7.221834 | -0.295716 | -2.958048 | F                                                                                                     | 3.088680  | -5.473486 | -2.162049 |
| C | -6.199298 | -1.228038 | -2.880002 | F                                                                                                     | 3.357234  | -5.065231 | 0.518554  |
| C | -5.174767 | -1.041548 | -1.959732 | H                                                                                                     | -1.768443 | -0.155047 | 1.729395  |
| F | -5.985753 | 0.209866  | 1.849236  | H                                                                                                     | 0.618064  | -0.047209 | 2.385902  |
| F | -6.853164 | -1.753058 | 3.467569  | H                                                                                                     | 1.768440  | 0.155016  | -1.729392 |
| F | -5.563063 | -4.154338 | 3.507737  | H                                                                                                     | -0.618067 | 0.047174  | -2.385899 |
| F | -3.400837 | -4.551606 | 1.906701  |                                                                                                       |           |           |           |
| F | -2.524186 | -2.619582 | 0.304584  | 80                                                                                                    |           |           |           |
| F | -3.543545 | 0.889748  | 2.939866  | B(C <sub>6</sub> F <sub>5</sub> ) <sub>2</sub> Ph-Q-B(C <sub>6</sub> F <sub>5</sub> ) <sub>2</sub> Ph |           |           |           |
| F | -6.240918 | 2.029420  | -0.414841 | C                                                                                                     | 0.930400  | -0.628480 | -0.919340 |
| F | -8.194527 | 1.697906  | -2.168820 | C                                                                                                     | -0.378310 | -0.838370 | -1.096060 |
| F | -8.222311 | -0.457145 | -3.834631 | C                                                                                                     | -1.373490 | -0.248479 | -0.183390 |
| F | -6.224637 | -2.303368 | -3.679558 | C                                                                                                     | -0.930400 | 0.628421  | 0.919400  |
| F | -4.258868 | -2.014860 | -1.904235 | C                                                                                                     | 0.378310  | 0.838310  | 1.096120  |
| F | -3.739184 | 2.601898  | -1.473615 | C                                                                                                     | 1.373500  | 0.248430  | 0.183450  |
| F | -3.357169 | 5.065207  | -0.518605 | O                                                                                                     | 2.556470  | 0.541310  | 0.394120  |
| F | -3.088601 | 5.473485  | 2.161994  | B                                                                                                     | 3.884180  | 0.170750  | -0.494830 |
| F | -3.195112 | 3.346776  | 3.864513  | C                                                                                                     | 4.196250  | -1.412910 | -0.299070 |
| O | 2.631223  | 0.124293  | 0.853987  | C                                                                                                     | 3.496400  | 0.635970  | -1.987620 |
| B | 3.816929  | -0.123132 | 0.044155  | C                                                                                                     | 5.012200  | 1.045800  | 0.261700  |
| C | 4.191339  | 1.086455  | -1.026992 | C                                                                                                     | 5.389620  | -1.874590 | -0.854830 |
| C | 3.673374  | -1.608715 | -0.673361 | C                                                                                                     | 5.841419  | -3.180611 | -0.734710 |
| C | 5.093468  | -0.057316 | 1.104411  | C                                                                                                     | 5.085149  | -4.093690 | -0.010430 |
| C | 5.304827  | 0.950363  | -1.850161 | C                                                                                                     | 3.896069  | -3.682030 | 0.570740  |
| C | 5.777585  | 1.946080  | -2.689621 | C                                                                                                     | 3.483840  | -2.362520 | 0.421830  |
| C | 5.125081  | 3.170861  | -2.710025 | C                                                                                                     | 3.657730  | -0.178070 | -3.114330 |
| C | 4.022954  | 3.366097  | -1.895777 | C                                                                                                     | 3.262610  | 0.248280  | -4.381480 |
| C | 3.581063  | 2.334955  | -1.067164 | C                                                                                                     | 2.693910  | 1.506700  | -4.549680 |

|   |           |           |           |                                                                                                                      |           |           |           |
|---|-----------|-----------|-----------|----------------------------------------------------------------------------------------------------------------------|-----------|-----------|-----------|
| C | 2.530200  | 2.339180  | -3.444490 | H                                                                                                                    | 4.095200  | -1.167360 | -3.007810 |
| C | 2.930300  | 1.905220  | -2.185160 | H                                                                                                                    | 3.400730  | -0.404570 | -5.237780 |
| C | 5.959810  | 1.834359  | -0.383200 | H                                                                                                                    | 2.384360  | 1.839810  | -5.535000 |
| C | 6.941710  | 2.540339  | 0.305380  | H                                                                                                                    | 2.097281  | 3.327140  | -3.566700 |
| C | 7.002710  | 2.458659  | 1.688460  | H                                                                                                                    | 2.812480  | 2.575360  | -1.334540 |
| C | 6.089290  | 1.665859  | 2.371510  | H                                                                                                                    | -2.812550 | -2.575379 | 1.334610  |
| C | 5.129790  | 0.974180  | 1.647900  | H                                                                                                                    | -2.097411 | -3.327139 | 3.566790  |
| F | 6.154280  | -1.024941 | -1.552860 | H                                                                                                                    | -2.384500 | -1.839779 | 5.535060  |
| F | 6.984469  | -3.562591 | -1.295500 | H                                                                                                                    | -3.400810 | 0.404621  | 5.237800  |
| F | 5.494679  | -5.349910 | 0.119150  | H                                                                                                                    | -4.095220 | 1.167401  | 3.007810  |
| F | 3.159499  | -4.544930 | 1.266860  |                                                                                                                      |           |           |           |
| F | 2.314950  | -2.048530 | 1.022680  |                                                                                                                      |           |           |           |
| F | 5.974450  | 1.940139  | -1.712750 | 80                                                                                                                   |           |           |           |
| F | 7.824501  | 3.289389  | -0.351790 | [B(C <sub>6</sub> F <sub>5</sub> ) <sub>2</sub> Ph-Q-B(C <sub>6</sub> F <sub>5</sub> ) <sub>2</sub> Ph] <sup>-</sup> |           |           |           |
| F | 7.933930  | 3.129729  | 2.357830  | C                                                                                                                    | 1.20959   | -0.16698  | 0.54547   |
| F | 6.149320  | 1.572049  | 3.699060  | C                                                                                                                    | -0.08969  | -0.35781  | 0.91189   |
| F | 4.285260  | 0.194280  | 2.343510  | C                                                                                                                    | -1.16452  | -0.21227  | -0.02570  |
| O | -2.556470 | -0.541349 | -0.394080 | C                                                                                                                    | -0.85711  | 0.14338   | -1.37946  |
| B | -3.884190 | -0.170749 | 0.494840  | C                                                                                                                    | 0.44230   | 0.34122   | -1.74216  |
| C | -4.196240 | 1.412901  | 0.299060  | C                                                                                                                    | 1.51681   | 0.18934   | -0.80739  |
| C | -3.496440 | -0.635969 | 1.987650  | O                                                                                                                    | 2.71049   | 0.38881   | -1.25837  |
| C | -5.012210 | -1.045799 | -0.261690 | B                                                                                                                    | 4.02516   | 0.13896   | -0.51648  |
| C | -5.389610 | 1.874601  | 0.854790  | C                                                                                                                    | 4.18497   | 1.15320   | 0.76689   |
| C | -5.841389 | 3.180631  | 0.734640  | C                                                                                                                    | 4.05223   | -1.46535  | -0.15249  |
| C | -5.085089 | 4.093691  | 0.010380  | C                                                                                                                    | 5.19595   | 0.55467   | -1.55429  |
| C | -3.895999 | 3.682011  | -0.570770 | C                                                                                                                    | 5.25498   | 0.98438   | 1.64305   |
| C | -3.483790 | 2.362501  | -0.421830 | C                                                                                                                    | 5.55678   | 1.85893   | 2.67455   |
| C | -2.930380 | -1.905219 | 2.185210  | C                                                                                                                    | 4.77311   | 2.99083   | 2.85377   |
| C | -2.530310 | -2.339179 | 3.444560  | C                                                                                                                    | 3.70851   | 3.21772   | 1.99855   |
| C | -2.694020 | -1.506679 | 4.549740  | C                                                                                                                    | 3.44288   | 2.30988   | 0.97681   |
| C | -3.262690 | -0.248239 | 4.381500  | C                                                                                                                    | 3.96935   | -2.04611  | 1.10854   |
| C | -3.657770 | 0.178091  | 3.114350  | C                                                                                                                    | 4.01041   | -3.41734  | 1.33391   |
| C | -5.129780 | -0.974189 | -1.647900 | C                                                                                                                    | 4.12967   | -4.27901  | 0.25578   |
| C | -6.089260 | -1.665879 | -2.371520 | C                                                                                                                    | 4.19147   | -3.75548  | -1.02690  |
| C | -7.002710 | -2.458648 | -1.688470 | C                                                                                                                    | 4.14356   | -2.37829  | -1.20415  |
| C | -6.941740 | -2.540319 | -0.305390 | C                                                                                                                    | 6.45707   | -0.05258  | -1.56078  |
| C | -5.959840 | -1.834329 | 0.383200  | C                                                                                                                    | 7.46755   | 0.37466   | -2.41910  |
| F | -6.154300 | 1.024981  | 1.552820  | C                                                                                                                    | 7.23880   | 1.43081   | -3.29678  |
| F | -6.984449 | 3.562642  | 1.295400  | C                                                                                                                    | 5.99335   | 2.05413   | -3.30401  |
| F | -5.494599 | 5.349921  | -0.119230 | C                                                                                                                    | 4.99140   | 1.62014   | -2.44024  |
| F | -3.159399 | 4.544901  | -1.266870 | F                                                                                                                    | 6.05885   | -0.08259  | 1.51001   |
| F | -2.314890 | 2.048491  | -1.022640 | F                                                                                                                    | 6.59133   | 1.63343   | 3.48896   |
| F | -4.285220 | -0.194319 | -2.343500 | F                                                                                                                    | 5.04617   | 3.85021   | 3.83735   |
| F | -6.149270 | -1.572079 | -3.699070 | F                                                                                                                    | 2.95224   | 4.30736   | 2.15422   |
| F | -7.933930 | -3.129708 | -2.357850 | F                                                                                                                    | 2.40500   | 2.62273   | 0.18130   |
| F | -7.824551 | -3.289338 | 0.351770  | F                                                                                                                    | 3.80006   | -1.28912  | 2.20819   |
| F | -5.974510 | -1.940099 | 1.712750  | F                                                                                                                    | 4.17998   | -1.94684  | -2.46900  |
| H | 1.686080  | -1.060310 | -1.564240 | F                                                                                                                    | 4.28925   | -4.57903  | -2.07323  |
| H | -0.773640 | -1.462899 | -1.889480 | F                                                                                                                    | 4.17066   | -5.59763  | 0.44808   |
| H | -1.686080 | 1.060251  | 1.564300  | F                                                                                                                    | 3.92603   | -3.90981  | 2.57224   |
| H | 0.773650  | 1.462840  | 1.889550  | O                                                                                                                    | -2.35575  | -0.42331  | 0.42747   |
|   |           |           |           | B                                                                                                                    | -3.67266  | -0.29025  | -0.34725  |

|                                                                                                                       |          |          |          |   |          |          |          |
|-----------------------------------------------------------------------------------------------------------------------|----------|----------|----------|---|----------|----------|----------|
| C                                                                                                                     | -3.75526 | -1.33151 | -1.58359 | C | 1.29164  | -0.30186 | -0.36367 |
| C                                                                                                                     | -3.80239 | 1.31004  | -0.71739 | O | 2.59545  | -0.16059 | -0.70153 |
| C                                                                                                                     | -4.82105 | -0.78835 | 0.71545  | B | 3.73317  | -0.57080 | 0.13225  |
| C                                                                                                                     | -4.82768 | -1.26416 | -2.48539 | C | 4.12491  | 0.52480  | 1.32732  |
| C                                                                                                                     | -4.99497 | -2.20605 | -3.49323 | C | 3.51245  | -2.08464 | 0.70388  |
| C                                                                                                                     | -4.08881 | -3.25868 | -3.62178 | C | 5.02892  | -0.47563 | -0.91299 |
| C                                                                                                                     | -3.03023 | -3.35994 | -2.72663 | C | 5.30441  | 0.36379  | 2.05078  |
| C                                                                                                                     | -2.87459 | -2.40970 | -1.71700 | C | 5.76016  | 1.25542  | 3.01230  |
| C                                                                                                                     | -3.99819 | 2.23306  | 0.31057  | C | 5.02340  | 2.40127  | 3.26902  |
| C                                                                                                                     | -4.09313 | 3.60291  | 0.11641  | C | 3.85559  | 2.62586  | 2.55981  |
| C                                                                                                                     | -3.97676 | 4.11552  | -1.16792 | C | 3.43456  | 1.70145  | 1.60527  |
| C                                                                                                                     | -3.76142 | 3.24724  | -2.22375 | C | 3.75371  | -2.52336 | 2.00909  |
| C                                                                                                                     | -3.67556 | 1.87907  | -1.98009 | C | 3.51706  | -3.84116 | 2.40105  |
| C                                                                                                                     | -4.60478 | -1.90288 | 1.52280  | C | 3.02477  | -4.76497 | 1.48585  |
| C                                                                                                                     | -5.56128 | -2.41981 | 2.38849  | C | 2.76067  | -4.35209 | 0.18071  |
| C                                                                                                                     | -6.81309 | -1.82829 | 2.45478  | C | 2.99811  | -3.03436 | -0.19264 |
| C                                                                                                                     | -7.08661 | -0.73470 | 1.64884  | C | 6.01160  | -1.43999 | -1.10926 |
| C                                                                                                                     | -6.09928 | -0.24840 | 0.80099  | C | 7.06006  | -1.29130 | -2.01453 |
| F                                                                                                                     | -4.11766 | 1.80974  | 1.57636  | C | 7.16658  | -0.12780 | -2.75601 |
| F                                                                                                                     | -3.43726 | -2.56038 | 1.48308  | C | 6.22829  | 0.87654  | -2.57528 |
| F                                                                                                                     | -5.29257 | -3.48720 | 3.14647  | C | 5.19752  | 0.68858  | -1.66235 |
| F                                                                                                                     | -7.74720 | -2.31257 | 3.27670  | F | 6.08807  | -0.70790 | 1.82655  |
| F                                                                                                                     | -8.29430 | -0.16330 | 1.69231  | F | 6.90171  | 1.03503  | 3.68284  |
| F                                                                                                                     | -6.45376 | 0.79869  | 0.03450  | F | 5.44110  | 3.28236  | 4.18884  |
| F                                                                                                                     | -3.42408 | 1.12429  | -3.06367 | F | 3.15146  | 3.74060  | 2.79491  |
| F                                                                                                                     | -3.62963 | 3.72712  | -3.46320 | F | 2.31159  | 2.02028  | 0.95964  |
| F                                                                                                                     | -4.06225 | 5.42889  | -1.37938 | F | 6.01581  | -2.58894 | -0.42175 |
| F                                                                                                                     | -4.29404 | 4.43111  | 1.14391  | F | 7.97599  | -2.25991 | -2.17274 |
| H                                                                                                                     | 2.01022  | -0.27123 | 1.26793  | F | 8.17158  | 0.03181  | -3.62955 |
| H                                                                                                                     | -0.36164 | -0.62510 | 1.92709  | F | 6.34135  | 2.01741  | -3.27210 |
| H                                                                                                                     | -1.65529 | 0.22882  | -2.10593 | F | 4.36514  | 1.72485  | -1.50519 |
| H                                                                                                                     | 0.71306  | 0.60408  | -2.75875 | O | -2.78604 | -0.70555 | 0.50357  |
| H                                                                                                                     | 6.65234  | -0.87979 | -0.88207 | B | -3.93307 | -0.39360 | -0.35678 |
| H                                                                                                                     | 8.43484  | -0.12017 | -2.40500 | C | -4.15989 | -1.43810 | -1.58935 |
| H                                                                                                                     | 8.02352  | 1.76503  | -3.96931 | C | -3.82818 | 1.20316  | -0.81880 |
| H                                                                                                                     | 5.80287  | 2.87976  | -3.98436 | C | -5.28127 | -0.63368 | 0.59566  |
| H                                                                                                                     | 4.02245  | 2.11409  | -2.45323 | C | -5.19633 | -1.26955 | -2.51963 |
| H                                                                                                                     | -5.54601 | -0.45075 | -2.39030 | C | -5.46457 | -2.21656 | -3.50187 |
| H                                                                                                                     | -5.83150 | -2.12179 | -4.18123 | C | -4.69618 | -3.37863 | -3.57671 |
| H                                                                                                                     | -4.21333 | -3.99550 | -4.40979 | C | -3.67043 | -3.57584 | -2.65732 |
| H                                                                                                                     | -2.32467 | -4.18181 | -2.80809 | C | -3.41371 | -2.61843 | -1.67516 |
| H                                                                                                                     | -2.05451 | -2.52374 | -1.01192 | C | -3.94859 | 2.19809  | 0.14992  |
|                                                                                                                       |          |          |          | C | -3.82407 | 3.55552  | -0.10778 |
|                                                                                                                       |          |          |          | C | -3.54966 | 3.97783  | -1.39987 |
|                                                                                                                       |          |          |          | C | -3.40405 | 3.03272  | -2.39897 |
|                                                                                                                       |          |          |          | C | -3.54019 | 1.68105  | -2.09139 |
|                                                                                                                       |          |          |          | C | -5.33873 | -1.70092 | 1.49208  |
|                                                                                                                       |          |          |          | C | -6.45483 | -1.99036 | 2.27146  |
|                                                                                                                       |          |          |          | C | -7.59428 | -1.21095 | 2.15976  |
|                                                                                                                       |          |          |          | C | -7.59881 | -0.15798 | 1.26114  |
|                                                                                                                       |          |          |          | C | -6.46098 | 0.09726  | 0.50456  |
| 80                                                                                                                    |          |          |          |   |          |          |          |
| [B(C <sub>6</sub> F <sub>5</sub> ) <sub>2</sub> Ph-Q-B(C <sub>6</sub> F <sub>5</sub> ) <sub>2</sub> Ph] <sup>2-</sup> |          |          |          |   |          |          |          |
| C                                                                                                                     | 0.82249  | -0.50899 | 0.94002  |   |          |          |          |
| C                                                                                                                     | -0.53963 | -0.62803 | 1.18853  |   |          |          |          |
| C                                                                                                                     | -1.48567 | -0.54773 | 0.15926  |   |          |          |          |
| C                                                                                                                     | -1.01903 | -0.33803 | -1.14417 |   |          |          |          |
| C                                                                                                                     | 0.34734  | -0.21756 | -1.38973 |   |          |          |          |

|   |          |          |          |   |           |           |           |
|---|----------|----------|----------|---|-----------|-----------|-----------|
| F | -4.23142 | 1.87151  | 1.42056  | C | -6.150589 | -3.203490 | 3.073120  |
| F | -4.31294 | -2.54584 | 1.63566  | C | -5.462470 | -2.050350 | 3.447210  |
| F | -6.45010 | -3.02805 | 3.12176  | C | -4.741880 | -1.336910 | 2.495740  |
| F | -8.68043 | -1.47995 | 2.89964  | F | -6.408940 | -0.405870 | -0.892590 |
| F | -8.70086 | 0.59699  | 1.12873  | F | -7.689610 | 1.930309  | -1.148060 |
| F | -6.57496 | 1.12372  | -0.36235 | F | -6.444590 | 4.255870  | -0.474100 |
| F | -3.36015 | 0.84638  | -3.12903 | F | -3.884100 | 4.187690  | 0.458520  |
| F | -3.13349 | 3.42892  | -3.65082 | F | -2.594070 | 1.899400  | 0.721690  |
| F | -3.42982 | 5.28326  | -1.67511 | O | 2.386120  | 0.738230  | -0.868370 |
| F | -3.97405 | 4.46439  | 0.86635  | B | 3.850110  | 0.894200  | -0.085160 |
| H | 1.53004  | -0.58382 | 1.76005  | C | 4.447660  | -0.614660 | 0.069330  |
| H | -0.90610 | -0.79150 | 2.19739  | C | 3.497460  | 1.643420  | 1.297750  |
| H | -1.71833 | -0.28900 | -1.97148 | C | 4.675110  | 1.754050  | -1.158760 |
| H | 0.71177  | -0.05578 | -2.39990 | C | 5.759010  | -0.708870 | 0.539490  |
| H | 4.12439  | -1.82086 | 2.75188  | C | 6.442500  | -1.906960 | 0.686050  |
| H | 3.71253  | -4.14395 | 3.42721  | C | 5.810600  | -3.095560 | 0.342360  |
| H | 2.83503  | -5.79191 | 1.78747  | C | 4.509170  | -3.057870 | -0.130170 |
| H | 2.35726  | -5.05771 | -0.54128 | C | 3.863120  | -1.832310 | -0.256260 |
| H | 2.76625  | -2.71303 | -1.20634 | C | 2.719880  | 2.812890  | 1.264930  |
| H | -5.80742 | -0.36823 | -2.46605 | C | 2.357000  | 3.484690  | 2.428530  |
| H | -6.27246 | -2.05241 | -4.21150 | C | 2.778230  | 3.005090  | 3.667060  |
| H | -4.89825 | -4.12205 | -4.34389 | C | 3.564520  | 1.858550  | 3.726530  |
| H | -3.06614 | -4.47860 | -2.70340 | C | 3.916370  | 1.189620  | 2.554840  |
| H | -2.61532 | -2.78129 | -0.95522 | C | 4.741860  | 1.336950  | -2.495720 |

80

B(C<sub>6</sub>F<sub>5</sub>)Ph<sub>2</sub>-Q-B(C<sub>6</sub>F<sub>5</sub>)Ph<sub>2</sub>

|   |           |           |           |   |           |           |           |
|---|-----------|-----------|-----------|---|-----------|-----------|-----------|
| C | -1.101080 | 0.191750  | -0.924680 | C | 6.109140  | 3.630360  | -1.749650 |
| C | 0.130920  | 0.524120  | -1.324340 | C | 6.150490  | 3.203610  | -3.073070 |
| C | 1.291330  | 0.372450  | -0.427470 | C | 6.109140  | 3.630360  | -1.749650 |
| C | 1.101080  | -0.191860 | 0.924660  | C | 5.375990  | 2.912010  | -0.806430 |
| C | -0.130920 | -0.524230 | 1.324310  | F | 6.408940  | 0.405950  | 0.892570  |
| C | -1.291340 | -0.372550 | 0.427450  | F | 7.689710  | -1.930179 | 1.148030  |
| O | -2.386120 | -0.738310 | 0.868360  | F | 6.444771  | -4.255790 | 0.474060  |
| B | -3.850140 | -0.894220 | 0.085160  | F | 3.884271  | -4.187700 | -0.458540 |
| C | -4.447620 | 0.614670  | -0.069340 | F | 2.594150  | -1.899460 | -0.721690 |
| C | -3.497530 | -1.643470 | -1.297740 | H | -1.974730 | 0.312350  | -1.553530 |
| C | -4.675160 | -1.754020 | 1.158780  | H | 0.339110  | 0.947220  | -2.300860 |
| C | -5.758970 | 0.708930  | -0.539510 | H | 1.974730  | -0.312450 | 1.553500  |
| C | -6.442400 | 1.907050  | -0.686070 | H | -0.339110 | -0.947340 | 2.300840  |
| C | -5.810470 | 3.095620  | -0.342380 | H | -4.523850 | -0.290840 | -2.627430 |
| C | -4.509040 | 3.057880  | 0.130150  | H | -3.905520 | -1.482870 | -4.686450 |
| C | -3.863040 | 1.832300  | 0.256260  | H | -2.500409 | -3.525850 | -4.577900 |
| C | -3.916410 | -1.189650 | -2.554840 | H | -1.753169 | -4.385130 | -2.370240 |
| C | -3.564600 | -1.858620 | -3.726520 | H | -2.403989 | -3.212710 | -0.302370 |
| C | -2.778380 | -3.005210 | -3.667040 | H | -5.352259 | -3.254280 | -0.224910 |
| C | -2.357169 | -3.484820 | -2.428500 | H | -6.647699 | -4.524340 | 1.450280  |
| C | -2.720020 | -2.812980 | -1.264910 | H | -6.717969 | -3.763020 | 3.810450  |
| C | -5.376100 | -2.911950 | 0.806460  | H | -5.494060 | -1.707980 | 4.477230  |
| C | -6.109289 | -3.630260 | 1.749700  | H | -4.215650 | -0.432140 | 2.797640  |
|   |           |           |           | H | 2.403830  | 3.212610  | 0.302390  |
|   |           |           |           | H | 1.752940  | 4.384970  | 2.370270  |
|   |           |           |           | H | 2.500230  | 3.525700  | 4.577920  |
|   |           |           |           | H | 3.905460  | 1.482810  | 4.686450  |

|   |          |          |           |
|---|----------|----------|-----------|
| H | 4.523860 | 0.290830 | 2.627420  |
| H | 4.215690 | 0.432150 | -2.797640 |
| H | 5.494050 | 1.708060 | -4.477200 |
| H | 6.717840 | 3.763160 | -3.810390 |
| H | 6.647500 | 4.524470 | -1.450220 |
| H | 5.352110 | 3.254340 | 0.224940  |

80

[B(C<sub>6</sub>F<sub>5</sub>)Ph<sub>2</sub>-Q-B(C<sub>6</sub>F<sub>5</sub>)Ph<sub>2</sub>]<sup>-</sup>

|   |           |           |           |
|---|-----------|-----------|-----------|
| C | 1.115180  | 0.201181  | 0.850700  |
| C | -0.127660 | 0.571260  | 1.269480  |
| C | -1.283720 | 0.391890  | 0.442330  |
| C | -1.115180 | -0.201230 | -0.850680 |
| C | 0.127660  | -0.571310 | -1.269450 |
| C | 1.283720  | -0.391939 | -0.442310 |
| O | 2.416340  | -0.769399 | -0.931820 |
| B | 3.773760  | -0.865699 | -0.199200 |
| C | 4.372730  | 0.643021  | 0.098060  |
| C | 3.550310  | -1.771599 | 1.132800  |
| C | 4.747270  | -1.569159 | -1.292130 |
| C | 5.604610  | 0.758191  | 0.742840  |
| C | 6.248380  | 1.964591  | 0.979930  |
| C | 5.664530  | 3.143241  | 0.539290  |
| C | 4.451820  | 3.085811  | -0.126110 |
| C | 3.840660  | 1.852831  | -0.337950 |
| C | 3.800480  | -1.363419 | 2.448050  |
| C | 3.553020  | -2.195669 | 3.539010  |
| C | 3.041590  | -3.473779 | 3.338940  |
| C | 2.781460  | -3.908299 | 2.040880  |
| C | 3.036110  | -3.066809 | 0.962290  |
| C | 5.748940  | -2.481399 | -0.939220 |
| C | 6.597950  | -3.039809 | -1.893500 |
| C | 6.463090  | -2.696599 | -3.235680 |
| C | 5.474670  | -1.789419 | -3.612390 |
| C | 4.635520  | -1.235989 | -2.649510 |
| F | 6.239090  | -0.341849 | 1.175520  |
| F | 7.423670  | 2.004571  | 1.615520  |
| F | 6.266200  | 4.316031  | 0.752430  |
| F | 3.883650  | 4.212531  | -0.565400 |
| F | 2.678630  | 1.901841  | -1.010830 |
| O | -2.416330 | 0.769350  | 0.931840  |
| B | -3.773750 | 0.865690  | 0.199210  |
| C | -4.372750 | -0.643020 | -0.098070 |
| C | -3.550270 | 1.771580  | -1.132780 |
| C | -4.747250 | 1.569160  | 1.292130  |
| C | -5.604630 | -0.758160 | -0.742840 |
| C | -6.248420 | -1.964540 | -0.979950 |
| C | -5.664590 | -3.143210 | -0.539320 |
| C | -4.451890 | -3.085810 | 0.126080  |
| C | -3.840700 | -1.852850 | 0.337930  |
| C | -3.036030 | 3.066780  | -0.962260 |

|   |           |           |           |
|---|-----------|-----------|-----------|
| C | -2.781350 | 3.908270  | -2.040850 |
| C | -3.041490 | 3.473770  | -3.338910 |
| C | -3.552960 | 2.195680  | -3.538990 |
| C | -3.800450 | 1.363420  | -2.448040 |
| C | -4.635540 | 1.235960  | 2.649510  |
| C | -5.474690 | 1.789400  | 3.612380  |
| C | -6.463070 | 2.696620  | 3.235680  |
| C | -6.597900 | 3.039860  | 1.893500  |
| C | -5.748890 | 2.481440  | 0.939220  |
| F | -6.239090 | 0.341890  | -1.175510 |
| F | -7.423710 | -2.004500 | -1.615540 |
| F | -6.266290 | -4.315990 | -0.752480 |
| F | -3.883730 | -4.212550 | 0.565360  |
| F | -2.678670 | -1.901880 | 1.010810  |
| H | 1.984960  | 0.347111  | 1.478740  |
| H | -0.288670 | 1.025330  | 2.241050  |
| H | -1.984960 | -0.347160 | -1.478720 |
| H | 0.288670  | -1.025369 | -2.241030 |
| H | 4.190510  | -0.364309 | 2.633450  |
| H | 3.758200  | -1.843369 | 4.546220  |
| H | 2.844560  | -4.125029 | 4.185560  |
| H | 2.379260  | -4.903169 | 1.870970  |
| H | 2.835520  | -3.419459 | -0.047700 |
| H | 5.860690  | -2.761999 | 0.105220  |
| H | 7.364390  | -3.747509 | -1.588620 |
| H | 7.120990  | -3.132339 | -3.982500 |
| H | 5.359440  | -1.514479 | -4.657600 |
| H | 3.864950  | -0.530409 | -2.953620 |
| H | -2.835430 | 3.419410  | 0.047730  |
| H | -2.379110 | 4.903130  | -1.870930 |
| H | -2.844440 | 4.125020  | -4.185520 |
| H | -3.758160 | 1.843390  | -4.546210 |
| H | -4.190520 | 0.364330  | -2.633450 |
| H | -3.865000 | 0.530350  | 2.953620  |
| H | -5.359480 | 1.514440  | 4.657590  |
| H | -7.120960 | 3.132370  | 3.982500  |
| H | -7.364300 | 3.747590  | 1.588620  |
| H | -5.860610 | 2.762070  | -0.105210 |

80

[B(C<sub>6</sub>F<sub>5</sub>)Ph<sub>2</sub>-Q-B(C<sub>6</sub>F<sub>5</sub>)Ph<sub>2</sub>]<sup>2-</sup>

|   |           |           |           |
|---|-----------|-----------|-----------|
| C | -1.198510 | -0.746000 | 0.818810  |
| C | 0.094330  | -0.721290 | 1.336690  |
| C | 1.217240  | -0.552400 | 0.520360  |
| C | 1.001800  | -0.400470 | -0.855630 |
| C | -0.288010 | -0.422660 | -1.375540 |
| C | -1.411520 | -0.596130 | -0.558220 |
| O | -2.621120 | -0.627780 | -1.164410 |
| B | -3.925120 | -0.575080 | -0.472740 |
| C | -4.271440 | -1.965880 | 0.321820  |
| C | -4.003840 | 0.797290  | 0.480590  |

|   |           |           |           |                                      |           |           |           |
|---|-----------|-----------|-----------|--------------------------------------|-----------|-----------|-----------|
| C | -5.061720 | -0.449410 | -1.647000 | H                                    | -6.691720 | -3.452270 | 2.238300  |
| C | -5.437240 | -2.138650 | 1.083470  | H                                    | -5.216840 | -5.430240 | 1.908300  |
| C | -5.780810 | -3.361490 | 1.650140  | H                                    | -3.143370 | -5.188630 | 0.555630  |
| C | -4.956940 | -4.471590 | 1.465610  | H                                    | -2.561470 | -3.006460 | -0.446150 |
| C | -3.797940 | -4.333580 | 0.708180  | H                                    | -6.602800 | 0.434400  | -0.431400 |
| C | -3.469100 | -3.100180 | 0.144840  | H                                    | -8.314330 | 0.473140  | -2.201310 |
| C | -4.044900 | 0.865200  | 1.869220  | H                                    | -7.779500 | -0.373910 | -4.478600 |
| C | -4.119700 | 2.055520  | 2.588600  | H                                    | -5.501370 | -1.256390 | -4.943980 |
| C | -4.140370 | 3.260910  | 1.910380  | H                                    | -3.790440 | -1.288200 | -3.146810 |
| C | -4.076760 | 3.255510  | 0.525650  | H                                    | 3.221740  | -3.232760 | 1.203830  |
| C | -4.003390 | 2.043280  | -0.149350 | H                                    | 3.136590  | -5.378540 | -0.021770 |
| C | -6.353150 | 0.045450  | -1.418420 | H                                    | 3.579010  | -5.431730 | -2.469830 |
| C | -7.324640 | 0.075510  | -2.417030 | H                                    | 4.085130  | -3.309410 | -3.661160 |
| C | -7.027570 | -0.396250 | -3.693320 | H                                    | 4.159670  | -1.184110 | -2.431180 |
| C | -5.750010 | -0.890470 | -3.949790 | H                                    | 3.677000  | 0.410640  | 2.960090  |
| C | -4.789450 | -0.913590 | -2.941110 | H                                    | 5.307880  | 0.332550  | 4.829800  |
| F | -3.996380 | -0.245120 | 2.625080  | H                                    | 7.408420  | -0.978220 | 4.591100  |
| F | -3.936720 | 2.130540  | -1.483120 | H                                    | 7.848490  | -2.200060 | 2.471110  |
| F | -4.091200 | 4.420910  | -0.138380 | H                                    | 6.215050  | -2.102600 | 0.620070  |
| F | -4.217920 | 4.418650  | 2.581980  |                                      |           |           |           |
| F | -4.170280 | 2.049770  | 3.929620  |                                      |           |           |           |
| O | 2.428670  | -0.524640 | 1.118980  | 80                                   |           |           |           |
| B | 3.724770  | -0.691080 | 0.431700  | BPh <sub>3</sub> -Q-BPh <sub>3</sub> |           |           |           |
| C | 4.180380  | 0.685200  | -0.415440 | C                                    | 0.997864  | -0.003511 | 1.054655  |
| C | 3.718420  | -2.035420 | -0.504260 | C                                    | -0.296685 | -0.033463 | 1.395860  |
| C | 4.826320  | -0.822050 | 1.641690  | C                                    | -1.361561 | -0.019758 | 0.377070  |
| C | 5.384970  | 0.729920  | -1.115070 | C                                    | -0.997865 | 0.003503  | -1.054655 |
| C | 5.875030  | 1.855380  | -1.764860 | C                                    | 0.296684  | 0.033454  | -1.395860 |
| C | 5.151850  | 3.035770  | -1.710700 | C                                    | 1.361560  | 0.019751  | -0.377070 |
| C | 3.958390  | 3.058700  | -1.009740 | O                                    | 2.528301  | 0.031427  | -0.790704 |
| C | 3.502740  | 1.903120  | -0.377790 | B                                    | 3.955247  | -0.047313 | 0.061450  |
| C | 3.423320  | -3.250800 | 0.134420  | C                                    | 4.119023  | 1.417250  | 0.725830  |
| C | 3.373650  | -4.459550 | -0.552850 | C                                    | 3.759773  | -1.271179 | 1.099942  |
| C | 3.619460  | -4.491930 | -1.924650 | C                                    | 5.019876  | -0.316456 | -1.113262 |
| C | 3.904270  | -3.303180 | -2.588620 | C                                    | 5.363268  | 1.698715  | 1.317738  |
| C | 3.949840  | -2.100870 | -1.882850 | C                                    | 5.613620  | 2.905374  | 1.959541  |
| C | 4.602860  | -0.149100 | 2.852320  | C                                    | 4.625548  | 3.888748  | 2.011103  |
| C | 5.515450  | -0.199030 | 3.903400  | C                                    | 3.396455  | 3.648988  | 1.410860  |
| C | 6.692980  | -0.933750 | 3.773110  | C                                    | 3.154134  | 2.428332  | 0.777306  |
| C | 6.937550  | -1.615680 | 2.583850  | C                                    | 4.036253  | -1.165263 | 2.469401  |
| C | 6.015210  | -1.557120 | 1.539370  | C                                    | 3.837986  | -2.237540 | 3.339625  |
| F | 6.167370  | -0.362810 | -1.193840 | C                                    | 3.349419  | -3.448077 | 2.857931  |
| F | 7.040910  | 1.821960  | -2.431130 | C                                    | 3.073780  | -3.583390 | 1.498493  |
| F | 5.606020  | 4.139670  | -2.322990 | C                                    | 3.284257  | -2.510085 | 0.637662  |
| F | 3.261480  | 4.201660  | -0.940440 | C                                    | 5.918179  | -1.388596 | -1.088403 |
| F | 2.353630  | 2.044890  | 0.290470  | C                                    | 6.857752  | -1.575016 | -2.103332 |
| H | -2.040700 | -0.903520 | 1.484080  | C                                    | 6.909785  | -0.691268 | -3.175239 |
| H | 0.260520  | -0.840890 | 2.403440  | C                                    | 6.025709  | 0.386622  | -3.221955 |
| H | 1.848850  | -0.265530 | -1.520500 | C                                    | 5.104015  | 0.569778  | -2.198077 |
| H | -0.455210 | -0.302980 | -2.442100 | H                                    | 6.150036  | 0.948605  | 1.265552  |
| H | -6.095710 | -1.284730 | 1.240670  | H                                    | 6.583402  | 3.085311  | 2.413659  |
|   |           |           |           | H                                    | 4.819450  | 4.835863  | 2.504307  |



|   |           |           |           |                                                      |  |  |
|---|-----------|-----------|-----------|------------------------------------------------------|--|--|
| H | 2.624667  | 4.412716  | 1.424985  |                                                      |  |  |
| H | 2.185360  | 2.299699  | 0.296448  |                                                      |  |  |
| H | 4.404891  | -0.222084 | 2.865727  |                                                      |  |  |
| H | 5.885117  | -2.092239 | -0.260266 |                                                      |  |  |
| H | 7.546297  | -2.413563 | -2.056457 |                                                      |  |  |
| H | 7.636655  | -0.835691 | -3.968770 |                                                      |  |  |
| H | 6.064921  | 1.085799  | -4.052101 |                                                      |  |  |
| H | 4.433482  | 1.427051  | -2.232524 |                                                      |  |  |
| H | 3.087567  | -2.638242 | -0.426085 |                                                      |  |  |
| H | 2.703241  | -4.527624 | 1.110438  |                                                      |  |  |
| H | 3.189590  | -4.282290 | 3.533831  |                                                      |  |  |
| H | 4.062360  | -2.124835 | 4.396187  |                                                      |  |  |
| O | -2.528302 | -0.031432 | 0.790703  |                                                      |  |  |
| B | -3.955249 | 0.047313  | -0.061451 |                                                      |  |  |
| C | -4.119028 | -1.417249 | -0.725834 |                                                      |  |  |
| C | -3.759770 | 1.271180  | -1.099940 |                                                      |  |  |
| C | -5.019877 | 0.316455  | 1.113261  |                                                      |  |  |
| C | -5.363273 | -1.698710 | -1.317741 |                                                      |  |  |
| C | -5.613628 | -2.905368 | -1.959546 |                                                      |  |  |
| C | -4.625558 | -3.888744 | -2.011109 |                                                      |  |  |
| C | -3.396465 | -3.648988 | -1.410866 |                                                      |  |  |
| C | -3.154142 | -2.428334 | -0.777310 |                                                      |  |  |
| C | -3.284250 | 2.510084  | -0.637658 |                                                      |  |  |
| C | -3.073768 | 3.583389  | -1.498487 |                                                      |  |  |
| C | -3.349407 | 3.448080  | -2.857925 |                                                      |  |  |
| C | -3.837979 | 2.237545  | -3.339622 |                                                      |  |  |
| C | -4.036250 | 1.165268  | -2.469399 |                                                      |  |  |
| C | -5.104023 | -0.569785 | 2.198071  |                                                      |  |  |
| C | -6.025715 | -0.386627 | 3.221951  |                                                      |  |  |
| C | -6.909781 | 0.691271  | 3.175242  |                                                      |  |  |
| C | -6.857741 | 1.575025  | 2.103341  |                                                      |  |  |
| C | -5.918171 | 1.388603  | 1.088409  |                                                      |  |  |
| H | -6.150040 | -0.948599 | -1.265556 |                                                      |  |  |
| H | -6.583410 | -3.085302 | -2.413665 |                                                      |  |  |
| H | -4.819464 | -4.835859 | -2.504314 |                                                      |  |  |
| H | -2.624680 | -4.412718 | -1.424991 |                                                      |  |  |
| H | -2.185367 | -2.299704 | -0.296452 |                                                      |  |  |
| H | -3.087559 | 2.638239  | 0.426090  |                                                      |  |  |
| H | -4.433497 | -1.427064 | 2.232512  |                                                      |  |  |
| H | -6.064932 | -1.085809 | 4.052092  |                                                      |  |  |
| H | -7.636650 | 0.835695  | 3.968774  |                                                      |  |  |
| H | -7.546279 | 2.413578  | 2.056470  |                                                      |  |  |
| H | -5.885105 | 2.092250  | 0.260276  |                                                      |  |  |
| H | -4.404891 | 0.222090  | -2.865727 |                                                      |  |  |
| H | -4.062352 | 2.124842  | -4.396184 |                                                      |  |  |
| H | -3.189575 | 4.282292  | -3.533824 |                                                      |  |  |
| H | -2.703227 | 4.527621  | -1.110430 |                                                      |  |  |
| H | 1.797368  | 0.007985  | 1.784973  |                                                      |  |  |
| H | -0.629360 | -0.045194 | 2.428061  |                                                      |  |  |
| H | -1.797369 | -0.007993 | -1.784974 |                                                      |  |  |
| H | 0.629359  | 0.045184  | -2.428061 |                                                      |  |  |
|   |           |           |           | 80                                                   |  |  |
|   |           |           |           | [BPh <sub>3</sub> -Q-BPh <sub>3</sub> ] <sup>-</sup> |  |  |
| C | -1.004182 | 0.023700  | -1.001888 |                                                      |  |  |
| C | 0.310437  | -0.013186 | -1.362072 |                                                      |  |  |
| C | 1.361449  | -0.035702 | -0.387154 |                                                      |  |  |
| C | 1.004183  | -0.023656 | 1.001881  |                                                      |  |  |
| C | -0.310436 | 0.013232  | 1.362066  |                                                      |  |  |
| C | -1.361448 | 0.035745  | 0.387148  |                                                      |  |  |
| O | -2.572193 | 0.079433  | 0.832048  |                                                      |  |  |
| B | -3.888331 | -0.016542 | 0.004934  |                                                      |  |  |
| C | -4.123085 | 1.382582  | -0.790285 |                                                      |  |  |
| C | -3.797228 | -1.340669 | -0.943981 |                                                      |  |  |
| C | -5.042604 | -0.186571 | 1.138456  |                                                      |  |  |
| C | -5.318005 | 1.571091  | -1.505969 |                                                      |  |  |
| C | -5.592862 | 2.749269  | -2.191877 |                                                      |  |  |
| C | -4.675194 | 3.798910  | -2.171354 |                                                      |  |  |
| C | -3.494107 | 3.651001  | -1.452880 |                                                      |  |  |
| C | -3.229318 | 2.460472  | -0.774318 |                                                      |  |  |
| C | -4.056829 | -1.360584 | -2.320071 |                                                      |  |  |
| C | -3.972778 | -2.535346 | -3.069371 |                                                      |  |  |
| C | -3.617771 | -3.731902 | -2.455959 |                                                      |  |  |
| C | -3.351790 | -3.742571 | -1.087306 |                                                      |  |  |
| C | -3.447077 | -2.565730 | -0.351857 |                                                      |  |  |
| C | -6.178078 | -0.982273 | 0.940342  |                                                      |  |  |
| C | -7.192956 | -1.067598 | 1.893424  |                                                      |  |  |
| C | -7.090878 | -0.358845 | 3.086401  |                                                      |  |  |
| C | -5.968876 | 0.437479  | 3.311374  |                                                      |  |  |
| C | -4.968787 | 0.521085  | 2.347301  |                                                      |  |  |
| H | -6.055232 | 0.769458  | -1.512521 |                                                      |  |  |
| H | -6.526971 | 2.854481  | -2.737597 |                                                      |  |  |
| H | -4.884334 | 4.722974  | -2.702757 |                                                      |  |  |
| H | -2.774222 | 4.464330  | -1.416299 |                                                      |  |  |
| H | -2.301745 | 2.382494  | -0.211942 |                                                      |  |  |
| H | -4.320831 | -0.432852 | -2.823157 |                                                      |  |  |
| H | -6.263322 | -1.559065 | 0.021178  |                                                      |  |  |
| H | -8.060667 | -1.695511 | 1.707230  |                                                      |  |  |
| H | -7.875299 | -0.426651 | 3.835235  |                                                      |  |  |
| H | -5.877132 | 0.995126  | 4.240090  |                                                      |  |  |
| H | -4.099830 | 1.149094  | 2.531542  |                                                      |  |  |
| H | -3.247467 | -2.588618 | 0.718184  |                                                      |  |  |
| H | -3.072044 | -4.670541 | -0.595644 |                                                      |  |  |
| H | -3.546411 | -4.647520 | -3.036206 |                                                      |  |  |
| H | -4.179732 | -2.512562 | -4.136220 |                                                      |  |  |
| O | 2.572194  | -0.079396 | -0.832054 |                                                      |  |  |
| B | 3.888331  | 0.016551  | -0.004935 |                                                      |  |  |
| C | 4.123046  | -1.382576 | 0.790292  |                                                      |  |  |
| C | 3.797256  | 1.340686  | 0.943972  |                                                      |  |  |
| C | 5.042614  | 0.186545  | -1.138451 |                                                      |  |  |
| C | 5.317937  | -1.571095 | 1.506021  |                                                      |  |  |
| C | 5.592761  | -2.749278 | 2.191933  |                                                      |  |  |

|                                                       |           |           |           |   |           |           |           |
|-------------------------------------------------------|-----------|-----------|-----------|---|-----------|-----------|-----------|
| C                                                     | 4.675089  | -3.798914 | 2.171370  | C | 4.314881  | -1.314048 | 2.286375  |
| C                                                     | 3.494031  | -3.650994 | 1.452849  | C | 4.297878  | -2.478512 | 3.058272  |
| C                                                     | 3.229274  | -2.460461 | 0.774284  | C | 3.785873  | -3.659316 | 2.532046  |
| C                                                     | 3.447181  | 2.565759  | 0.351826  | C | 3.288409  | -3.659176 | 1.228299  |
| C                                                     | 3.351918  | 3.742610  | 1.087265  | C | 3.319582  | -2.493846 | 0.470526  |
| C                                                     | 3.617845  | 3.731937  | 2.455928  | C | 6.285917  | -0.892357 | -0.828393 |
| C                                                     | 3.972776  | 2.535369  | 3.069361  | C | 7.314057  | -1.039972 | -1.759481 |
| C                                                     | 4.056804  | 1.360599  | 2.320071  | C | 7.161993  | -0.545248 | -3.052186 |
| C                                                     | 4.968766  | -0.521076 | -2.347314 | C | 5.970479  | 0.092809  | -3.395261 |
| C                                                     | 5.968865  | -0.437499 | -3.311379 | C | 4.955491  | 0.237822  | -2.452438 |
| C                                                     | 7.090909  | 0.358759  | -3.086379 | H | 6.174821  | 0.876156  | 1.380524  |
| C                                                     | 7.193018  | 1.067476  | -1.893384 | H | 6.680276  | 3.021244  | 2.476015  |
| C                                                     | 6.178129  | 0.982182  | -0.940311 | H | 5.021418  | 4.877334  | 2.417583  |
| H                                                     | 6.055167  | -0.769465 | 1.512609  | H | 2.858204  | 4.534641  | 1.237317  |
| H                                                     | 6.526849  | -2.854498 | 2.737690  | H | 2.356098  | 2.373791  | 0.163207  |
| H                                                     | 4.884202  | -4.722982 | 2.702777  | H | 4.697936  | -0.397257 | 2.729685  |
| H                                                     | 2.774143  | -4.464321 | 1.416237  | H | 6.411427  | -1.311357 | 0.169549  |
| H                                                     | 2.301724  | -2.382475 | 0.211872  | H | 8.232458  | -1.552429 | -1.478827 |
| H                                                     | 3.247615  | 2.588649  | -0.718222 | H | 7.957239  | -0.661741 | -3.785178 |
| H                                                     | 4.099778  | -1.149034 | -2.531577 | H | 5.833741  | 0.476440  | -4.404667 |
| H                                                     | 5.877097  | -0.995118 | -4.240110 | H | 4.023306  | 0.725564  | -2.725438 |
| H                                                     | 7.875337  | 0.426542  | -3.835208 | H | 2.922087  | -2.498520 | -0.542624 |
| H                                                     | 8.060761  | 1.695338  | -1.707169 | H | 2.870238  | -4.570948 | 0.807603  |
| H                                                     | 6.263398  | 1.558947  | -0.021133 | H | 3.763367  | -4.566863 | 3.130768  |
| H                                                     | 4.320747  | 0.432859  | 2.823175  | H | 4.677407  | -2.458208 | 4.078147  |
| H                                                     | 4.179688  | 2.512583  | 4.136218  | O | -2.634312 | -0.092873 | 0.862529  |
| H                                                     | 3.546503  | 4.647562  | 3.036166  | B | -3.880723 | -0.006061 | 0.044641  |
| H                                                     | 3.072232  | 4.670589  | 0.595586  | C | -4.204623 | -1.428815 | -0.711234 |
| H                                                     | -1.790660 | 0.052849  | -1.745171 | C | -3.836421 | 1.285845  | -0.970150 |
| H                                                     | 0.611700  | -0.016863 | -2.404048 | C | -5.082356 | 0.243208  | 1.140116  |
| H                                                     | 1.790660  | -0.052806 | 1.745165  | C | -5.425205 | -1.666623 | -1.366337 |
| H                                                     | -0.611699 | 0.016909  | 2.404042  | C | -5.722450 | -2.882298 | -1.978249 |
|                                                       |           |           |           | C | -4.797956 | -3.924471 | -1.943250 |
|                                                       |           |           |           | C | -3.587751 | -3.728956 | -1.282844 |
|                                                       |           |           |           | C | -3.304227 | -2.504451 | -0.678032 |
| 80                                                    |           |           |           | C | -3.319522 | 2.493829  | -0.470483 |
| [BPh <sub>3</sub> -Q-BPh <sub>3</sub> ] <sup>2-</sup> |           |           |           | C | -3.288326 | 3.659172  | -1.228234 |
| C                                                     | 1.005315  | 0.108282  | 0.959022  | C | -3.785796 | 3.659349  | -2.531978 |
| C                                                     | -0.334775 | 0.068828  | 1.333751  | C | -4.297834 | 2.478567  | -3.058224 |
| C                                                     | -1.368476 | -0.040755 | 0.394192  | C | -4.314860 | 1.314089  | -2.286348 |
| C                                                     | -1.005317 | -0.108335 | -0.959023 | C | -4.955502 | -0.237872 | 2.452429  |
| C                                                     | 0.334773  | -0.068881 | -1.333752 | C | -5.970487 | -0.092858 | 3.395255  |
| C                                                     | 1.368474  | 0.040701  | -0.394193 | C | -7.161984 | 0.545241  | 3.052197  |
| O                                                     | 2.634310  | 0.092818  | -0.862531 | C | -7.314032 | 1.040005  | 1.759505  |
| B                                                     | 3.880722  | 0.006048  | -0.044641 | C | -6.285896 | 0.892389  | 0.828414  |
| C                                                     | 4.204592  | 1.428823  | 0.711207  | H | -6.174843 | -0.876096 | -1.380533 |
| C                                                     | 3.836448  | -1.285841 | 0.970174  | H | -6.680343 | -3.021152 | -2.476069 |
| C                                                     | 5.082360  | -0.243218 | -1.140112 | H | -5.021520 | -4.877275 | -2.417680 |
| C                                                     | 5.425167  | 1.666668  | 1.366308  | H | -2.858297 | -4.534648 | -1.237413 |
| C                                                     | 5.722388  | 2.882362  | 1.978196  | H | -2.356146 | -2.373829 | -0.163260 |
| C                                                     | 4.797873  | 3.924517  | 1.943172  | H | -2.922022 | 2.498474  | 0.542665  |
| C                                                     | 3.587674  | 3.728965  | 1.282767  |   |           |           |           |
| C                                                     | 3.304175  | 2.504442  | 0.677980  |   |           |           |           |

|                                      |           |           |           |                                                      |           |           |           |
|--------------------------------------|-----------|-----------|-----------|------------------------------------------------------|-----------|-----------|-----------|
| H                                    | -4.023330 | -0.725646 | 2.725416  | H                                                    | -3.456549 | 0.589890  | 3.486380  |
| H                                    | -5.833761 | -0.476521 | 4.404651  | H                                                    | -3.601789 | 1.792120  | 2.199250  |
| H                                    | -7.957227 | 0.661735  | 3.785191  | H                                                    | -2.164629 | 0.781050  | 2.314190  |
| H                                    | -8.232420 | 1.552495  | 1.478865  | H                                                    | -5.007269 | -3.102840 | -1.356560 |
| H                                    | -6.411393 | 1.311419  | -0.169516 | H                                                    | -4.738949 | -2.675590 | 0.334940  |
| H                                    | -4.697941 | 0.397315  | -2.729673 | H                                                    | -5.985459 | -1.850480 | -0.591100 |
| H                                    | -4.677368 | 2.458291  | -4.078096 | H                                                    | 5.051461  | 1.685071  | 1.064210  |
| H                                    | -3.763272 | 4.566906  | -3.130683 | H                                                    | 3.325831  | 1.778551  | 1.031580  |
| H                                    | -2.870129 | 4.570925  | -0.807523 | H                                                    | 3.293431  | 0.306821  | -2.146870 |
| H                                    | 1.778275  | 0.195383  | 1.715605  | H                                                    | 5.026291  | 0.176351  | -2.109680 |
| H                                    | -0.612986 | 0.121791  | 2.382763  | H                                                    | 4.967001  | -2.032429 | 0.456160  |
| H                                    | -1.778278 | -0.195432 | -1.715607 | H                                                    | 6.164601  | -0.757999 | 0.473130  |
| H                                    | 0.612983  | -0.121843 | -2.382765 | H                                                    | 3.937401  | -1.825769 | -3.217610 |
| 56                                   |           |           |           | H                                                    | 4.900671  | -2.292629 | -1.815590 |
| BEt <sub>3</sub> -Q-BEt <sub>3</sub> |           |           |           | H                                                    | 3.147981  | -2.227319 | -1.689770 |
| C                                    | -0.939089 | -0.825620 | 0.503500  | H                                                    | 5.657881  | -1.560569 | 2.807210  |
| C                                    | 0.341921  | -1.164269 | 0.692990  | H                                                    | 5.188531  | 0.130131  | 2.635510  |
| C                                    | 1.446291  | -0.304219 | 0.215070  | H                                                    | 3.960901  | -1.132799 | 2.587850  |
| C                                    | 1.119361  | 0.955031  | -0.484360 | H                                                    | 4.319650  | 3.635341  | -0.292500 |
| C                                    | -0.161589 | 1.291340  | -0.677310 | H                                                    | 3.511370  | 2.579761  | -1.450320 |
| C                                    | -1.262849 | 0.428090  | -0.204730 | H                                                    | 5.245670  | 2.493171  | -1.265880 |
| O                                    | -2.415399 | 0.800740  | -0.434180 | 56                                                   |           |           |           |
| O                                    | 2.598751  | -0.676949 | 0.424510  | [BEt <sub>3</sub> -Q-BEt <sub>3</sub> ] <sup>-</sup> |           |           |           |
| B                                    | -3.928289 | 0.083910  | -0.075740 | C                                                    | -0.967380 | -0.330950 | 0.815730  |
| C                                    | -3.951499 | -1.202990 | -1.073020 | C                                                    | 0.344220  | -0.480619 | 1.161200  |
| C                                    | -3.929599 | -0.252440 | 1.515200  | C                                                    | 1.411350  | -0.218779 | 0.237440  |
| C                                    | -4.895859 | 1.305640  | -0.493160 | C                                                    | 1.057270  | 0.207051  | -1.086110 |
| C                                    | -6.369459 | 0.902550  | -0.622880 | C                                                    | -0.253970 | 0.355461  | -1.432290 |
| C                                    | -3.257499 | 0.778530  | 2.427400  | C                                                    | -1.321740 | 0.099380  | -0.507180 |
| C                                    | -4.975599 | -2.265540 | -0.652150 | O                                                    | -2.523060 | 0.274850  | -0.926100 |
| B                                    | 4.185701  | -0.002259 | -0.092680 | O                                                    | 2.613590  | -0.391519 | 0.654600  |
| C                                    | 4.193581  | 1.554321  | 0.392040  | B                                                    | -3.883000 | 0.058550  | -0.136500 |
| C                                    | 4.113001  | -0.266349 | -1.685410 | C                                                    | -4.015100 | -1.551150 | 0.170790  |
| C                                    | 5.125561  | -0.988109 | 0.754830  | C                                                    | -3.893480 | 1.013010  | 1.199310  |
| C                                    | 4.018941  | -1.728039 | -2.130730 | C                                                    | -4.973550 | 0.564220  | -1.241540 |
| C                                    | 4.981661  | -0.883209 | 2.276750  | C                                                    | -6.429500 | 0.230540  | -0.905080 |
| C                                    | 4.315260  | 2.621631  | -0.704580 | C                                                    | -3.280180 | 2.402260  | 0.995950  |
| H                                    | -1.765879 | -1.433520 | 0.848450  | C                                                    | -4.899150 | -1.900880 | 1.374370  |
| H                                    | 0.639261  | -2.073189 | 1.205160  | B                                                    | 3.986440  | -0.096379 | -0.085030 |
| H                                    | 1.944161  | 1.570271  | -0.820850 | C                                                    | 4.069920  | 1.522221  | -0.294690 |
| H                                    | -0.460300 | 2.201630  | -1.186100 | C                                                    | 4.079170  | -0.940239 | -1.489780 |
| H                                    | -4.165399 | -0.880180 | -2.101130 | C                                                    | 5.075730  | -0.652959 | 0.994570  |
| H                                    | -2.962469 | -1.686920 | -1.118760 | C                                                    | 3.452400  | -2.337869 | -1.449120 |
| H                                    | -3.553229 | -1.256150 | 1.762860  | C                                                    | 5.063910  | 0.074601  | 2.341530  |
| H                                    | -4.996729 | -0.298780 | 1.778540  | C                                                    | 5.444300  | 1.970462  | -0.801840 |
| H                                    | -4.565459 | 1.721440  | -1.455210 | H                                                    | -1.759790 | -0.530960 | 1.524880  |
| H                                    | -4.817700 | 2.129950  | 0.230640  | H                                                    | 0.633720  | -0.802719 | 2.156170  |
| H                                    | -7.014579 | 1.762809  | -0.826540 | H                                                    | 1.850960  | 0.398701  | -1.796000 |
| H                                    | -6.512239 | 0.188560  | -1.440670 | H                                                    | -0.543720 | 0.674091  | -2.428210 |
| H                                    | -6.742539 | 0.427569  | 0.291920  | H                                                    | -4.412990 | -2.059140 | -0.721330 |

|                                                       |           |           |           |                                                                                      |           |           |           |
|-------------------------------------------------------|-----------|-----------|-----------|--------------------------------------------------------------------------------------|-----------|-----------|-----------|
| H                                                     | -3.025840 | -2.004280 | 0.334070  | C                                                                                    | 3.682360  | -2.369670 | -1.399940 |
| H                                                     | -3.422640 | 0.552660  | 2.080860  | C                                                                                    | 5.011370  | 0.210580  | 2.379970  |
| H                                                     | -4.948630 | 1.133930  | 1.490880  | C                                                                                    | 5.323140  | 2.064380  | -0.823630 |
| H                                                     | -4.725710 | 0.102600  | -2.209260 | H                                                                                    | -1.732700 | -0.413940 | 1.541470  |
| H                                                     | -4.887210 | 1.649570  | -1.404530 | H                                                                                    | 0.648300  | -0.689230 | 2.167890  |
| H                                                     | -7.139200 | 0.619539  | -1.646070 | H                                                                                    | 1.830540  | 0.142170  | -1.846530 |
| H                                                     | -6.581070 | -0.853900 | -0.850650 | H                                                                                    | -0.552050 | 0.431030  | -2.472940 |
| H                                                     | -6.722170 | 0.642870  | 0.068580  | H                                                                                    | -4.472090 | -2.116030 | -0.513570 |
| H                                                     | -3.423731 | 3.062200  | 1.860060  | H                                                                                    | -3.042480 | -1.978030 | 0.479720  |
| H                                                     | -3.715160 | 2.901050  | 0.123100  | H                                                                                    | -3.413450 | 0.759100  | 2.004160  |
| H                                                     | -2.200520 | 2.336490  | 0.817310  | H                                                                                    | -4.977650 | 1.245800  | 1.410720  |
| H                                                     | -5.020080 | -2.982690 | 1.512110  | H                                                                                    | -4.796530 | -0.121400 | -2.198350 |
| H                                                     | -4.476540 | -1.500190 | 2.302710  | H                                                                                    | -4.957280 | 1.497700  | -1.548790 |
| H                                                     | -5.901440 | -1.469490 | 1.276510  | H                                                                                    | -7.215590 | 0.417329  | -1.618370 |
| H                                                     | 3.851110  | 2.041341  | 0.650050  | H                                                                                    | -6.600110 | -0.953781 | -0.688740 |
| H                                                     | 3.305790  | 1.874051  | -1.004210 | H                                                                                    | -6.737140 | 0.629549  | 0.069550  |
| H                                                     | 3.669930  | -0.390099 | -2.352360 | H                                                                                    | -3.453100 | 3.236360  | 1.547890  |
| H                                                     | 5.150210  | -1.049008 | -1.718250 | H                                                                                    | -3.822200 | 2.902040  | -0.151840 |
| H                                                     | 4.900750  | -1.725559 | 1.170230  | H                                                                                    | -2.275770 | 2.400190  | 0.518340  |
| H                                                     | 6.084670  | -0.591338 | 0.559630  | H                                                                                    | -5.003380 | -2.827380 | 1.828920  |
| H                                                     | 3.644190  | -2.919739 | -2.358870 | H                                                                                    | -4.412760 | -1.279590 | 2.443860  |
| H                                                     | 3.839520  | -2.913539 | -0.601170 | H                                                                                    | -5.878220 | -1.330521 | 1.478500  |
| H                                                     | 2.364520  | -2.284649 | -1.324320 | H                                                                                    | 3.704860  | 2.070750  | 0.602770  |
| H                                                     | 5.737390  | -0.373358 | 3.083160  | H                                                                                    | 3.199140  | 1.811040  | -1.049850 |
| H                                                     | 5.360230  | 1.124002  | 2.224900  | H                                                                                    | 3.799630  | -0.434590 | -2.337970 |
| H                                                     | 4.053770  | 0.074171  | 2.765980  | H                                                                                    | 5.309790  | -0.978350 | -1.649090 |
| H                                                     | 5.505439  | 3.051212  | -0.979680 | H                                                                                    | 5.061350  | -1.602000 | 1.222920  |
| H                                                     | 5.697320  | 1.468532  | -1.743370 | H                                                                                    | 6.139080  | -0.352660 | 0.622170  |
| H                                                     | 6.230160  | 1.711572  | -0.082820 | H                                                                                    | 3.917730  | -2.966590 | -2.294430 |
| 56                                                    |           |           |           | H                                                                                    | 4.087100  | -2.903850 | -0.531670 |
| [BEt <sub>3</sub> -Q-BEt <sub>3</sub> ] <sup>2-</sup> |           |           |           | H                                                                                    | 2.593740  | -2.359320 | -1.280390 |
| C                                                     | -0.960970 | -0.284280 | 0.790800  | H                                                                                    | 5.701300  | -0.155200 | 3.156580  |
| C                                                     | 0.378560  | -0.441160 | 1.143780  | H                                                                                    | 5.201040  | 1.285450  | 2.259780  |
| C                                                     | 1.427810  | -0.296260 | 0.222130  | H                                                                                    | 3.988000  | 0.108410  | 2.756460  |
| C                                                     | 1.056370  | 0.023690  | -1.096090 | H                                                                                    | 5.322030  | 3.140540  | -1.054470 |
| C                                                     | -0.281490 | 0.184110  | -1.448920 | H                                                                                    | 5.631740  | 1.537440  | -1.736140 |
| C                                                     | -1.333010 | 0.036250  | -0.527780 | H                                                                                    | 6.114230  | 1.893380  | -0.081710 |
| O                                                     | -2.585070 | 0.216580  | -0.970880 | 60                                                                                   |           |           |           |
| O                                                     | 2.682370  | -0.504130 | 0.649650  | [B(C <sub>6</sub> F <sub>5</sub> ) <sub>3</sub> -Q-SiPhH <sub>2</sub> ] <sup>+</sup> |           |           |           |
| B                                                     | -3.861800 | 0.048830  | -0.165410 | C                                                                                    | -2.934375 | -0.083789 | -2.228885 |
| C                                                     | -4.033190 | -1.531790 | 0.313590  | C                                                                                    | -1.596658 | -0.085784 | -2.310732 |
| C                                                     | -3.925750 | 1.119820  | 1.098810  | C                                                                                    | -0.763915 | 0.074339  | -1.092655 |
| C                                                     | -5.025780 | 0.432400  | -1.274370 | C                                                                                    | -1.420550 | 0.270415  | 0.222852  |
| C                                                     | -6.468010 | 0.121199  | -0.866020 | C                                                                                    | -2.759639 | 0.294762  | 0.284276  |
| C                                                     | -3.343160 | 2.491450  | 0.745290  | C                                                                                    | -3.562098 | 0.103108  | -0.921750 |
| C                                                     | -4.874520 | -1.763960 | 1.575050  | O                                                                                    | -4.813214 | 0.107523  | -0.773270 |
| B                                                     | 3.966250  | -0.090070 | -0.049550 | O                                                                                    | 0.451916  | 0.038611  | -1.254916 |
| C                                                     | 3.975630  | 1.535760  | -0.321130 | H                                                                                    | -3.561540 | -0.218789 | -3.103971 |
| C                                                     | 4.224330  | -0.938270 | -1.452990 | H                                                                                    | -1.056637 | -0.223026 | -3.242504 |
| C                                                     | 5.131690  | -0.517450 | 1.039410  | H                                                                                    | -0.797343 | 0.384907  | 1.105572  |

|    |            |           |           |                                                                                      |            |           |           |
|----|------------|-----------|-----------|--------------------------------------------------------------------------------------|------------|-----------|-----------|
| H  | -3.303075  | 0.433177  | 1.212720  | [B(C <sub>6</sub> F <sub>5</sub> ) <sub>3</sub> -Q-SiPhH <sub>2</sub> ] <sup>+</sup> |            |           |           |
| Si | -6.199494  | -0.115341 | -1.932267 | C                                                                                    | -3.005191  | -0.160842 | -2.093932 |
| C  | -7.710028  | -0.102678 | -0.916979 | C                                                                                    | -1.645288  | -0.136901 | -2.208226 |
| C  | -8.224535  | -1.304265 | -0.400575 | C                                                                                    | -0.806826  | -0.115677 | -1.041466 |
| C  | -9.373710  | -1.292786 | 0.380150  | C                                                                                    | -1.420206  | -0.138588 | 0.260007  |
| C  | -10.018931 | -0.086159 | 0.646067  | C                                                                                    | -2.779428  | -0.161847 | 0.361123  |
| C  | -9.523357  | 1.111711  | 0.133248  | C                                                                                    | -3.597804  | -0.169441 | -0.802815 |
| C  | -8.374565  | 1.106099  | -0.647893 | O                                                                                    | -4.906222  | -0.188998 | -0.612514 |
| H  | -5.991614  | 1.042054  | -2.819020 | O                                                                                    | 0.454072   | -0.080889 | -1.247614 |
| H  | -5.837851  | -1.404279 | -2.546565 | H                                                                                    | -3.630619  | -0.173864 | -2.980739 |
| H  | -7.734254  | -2.250977 | -0.612728 | H                                                                                    | -1.147065  | -0.130149 | -3.170911 |
| H  | -9.770214  | -2.221402 | 0.775365  | H                                                                                    | -0.796077  | -0.150910 | 1.146032  |
| H  | -10.918886 | -0.079947 | 1.252032  | H                                                                                    | -3.277496  | -0.182600 | 1.323782  |
| H  | -10.036050 | 2.045121  | 0.337256  | Si                                                                                   | -6.155580  | -0.205000 | -1.785886 |
| H  | -8.001570  | 2.043175  | -1.053390 | C                                                                                    | -7.757765  | -0.220867 | -0.872739 |
| B  | 1.686199   | 0.084503  | -0.099400 | C                                                                                    | -8.364179  | -1.433678 | -0.514675 |
| C  | 1.368237   | -1.074093 | 0.989184  | C                                                                                    | -9.567163  | -1.445565 | 0.183232  |
| C  | 1.586087   | 1.625746  | 0.371270  | C                                                                                    | -10.181014 | -0.243332 | 0.526972  |
| C  | 2.962676   | -0.353274 | -0.963495 | C                                                                                    | -9.595744  | 0.970000  | 0.172733  |
| C  | 2.217390   | -1.101935 | 2.095519  | C                                                                                    | -8.392753  | 0.980351  | -0.525190 |
| C  | 2.184811   | -2.091363 | 3.065315  | H                                                                                    | -5.983422  | 1.018057  | -2.598808 |
| C  | 1.268860   | -3.130906 | 2.940329  | H                                                                                    | -5.955484  | -1.424613 | -2.597132 |
| C  | 0.407241   | -3.152623 | 1.854143  | H                                                                                    | -7.896049  | -2.377213 | -0.784192 |
| C  | 0.483131   | -2.140546 | 0.904931  | H                                                                                    | -10.027492 | -2.389372 | 0.455738  |
| C  | 1.974863   | 2.645432  | -0.499037 | H                                                                                    | -11.121049 | -0.252114 | 1.069201  |
| C  | 1.943095   | 3.991844  | -0.164359 | H                                                                                    | -10.078214 | 1.905034  | 0.437100  |
| C  | 1.484637   | 4.367842  | 1.092336  | H                                                                                    | -7.947072  | 1.932298  | -0.803074 |
| C  | 1.058010   | 3.393672  | 1.984630  | B                                                                                    | 1.570130   | 0.060200  | -0.173468 |
| C  | 1.114768   | 2.057416  | 1.607985  | C                                                                                    | 1.589959   | -1.225329 | 0.831022  |
| C  | 2.886705   | -1.494488 | -1.757320 | C                                                                                    | 1.279777   | 1.511528  | 0.520364  |
| C  | 3.956236   | -1.996441 | -2.481117 | C                                                                                    | 2.950968   | -0.022416 | -1.029252 |
| C  | 5.182528   | -1.346709 | -2.401856 | C                                                                                    | 2.500509   | -1.198058 | 1.885181  |
| C  | 5.312237   | -0.215282 | -1.607494 | C                                                                                    | 2.715801   | -2.262965 | 2.744405  |
| C  | 4.210938   | 0.258279  | -0.903972 | C                                                                                    | 2.005013   | -3.441351 | 2.548552  |
| F  | 3.112757   | -0.119564 | 2.237017  | C                                                                                    | 1.099431   | -3.524397 | 1.503832  |
| F  | 3.012750   | -2.058363 | 4.099068  | C                                                                                    | 0.917489   | -2.428657 | 0.665053  |
| F  | 1.212643   | -4.085395 | 3.855291  | C                                                                                    | 1.398728   | 2.662887  | -0.256458 |
| F  | -0.484878  | -4.129829 | 1.723009  | C                                                                                    | 1.154452   | 3.942524  | 0.218755  |
| F  | -0.405759  | -2.232298 | -0.117574 | C                                                                                    | 0.755308   | 4.110231  | 1.538147  |
| F  | 2.393721   | 2.339449  | -1.730143 | C                                                                                    | 0.603240   | 2.996799  | 2.348461  |
| F  | 1.719200   | -2.162008 | -1.836311 | C                                                                                    | 0.864328   | 1.733950  | 1.827524  |
| F  | 3.821494   | -3.082801 | -3.234467 | C                                                                                    | 3.113521   | -1.073806 | -1.928131 |
| F  | 6.221791   | -1.806634 | -3.080894 | C                                                                                    | 4.265363   | -1.274303 | -2.675165 |
| F  | 6.482478   | 0.404670  | -1.525262 | C                                                                                    | 5.332487   | -0.401377 | -2.515925 |
| F  | 4.399000   | 1.345144  | -0.151199 | C                                                                                    | 5.226845   | 0.647266  | -1.615166 |
| F  | 0.635487   | 1.173536  | 2.504633  | C                                                                                    | 4.052164   | 0.814269  | -0.889824 |
| F  | 0.590405   | 3.739355  | 3.177903  | F                                                                                    | 3.214111   | -0.083432 | 2.094333  |
| F  | 1.431864   | 5.646055  | 1.427386  | F                                                                                    | 3.592245   | -2.175133 | 3.742851  |
| F  | 2.326026   | 4.916228  | -1.034594 | F                                                                                    | 2.192158   | -4.478928 | 3.359381  |
|    |            |           |           | F                                                                                    | 0.412680   | -4.649783 | 1.304843  |
|    |            |           |           | F                                                                                    | 0.024601   | -2.593456 | -0.327782 |

|   |          |           |           |
|---|----------|-----------|-----------|
| F | 1.775525 | 2.560087  | -1.537158 |
| F | 2.125882 | -1.969268 | -2.089362 |
| F | 4.360673 | -2.294747 | -3.528068 |
| F | 6.449305 | -0.573648 | -3.218224 |
| F | 6.250430 | 1.484554  | -1.451145 |
| F | 4.031445 | 1.843826  | -0.034679 |
| F | 0.637984 | 0.704193  | 2.663755  |
| F | 0.195440 | 3.140037  | 3.609049  |
| F | 0.505288 | 5.326417  | 2.013331  |
| F | 1.291411 | 5.004956  | -0.572750 |

60

 $[B(C_6F_5)_3-Q-SiPhH_2]^-$ 

|    |            |           |           |
|----|------------|-----------|-----------|
| C  | -3.003047  | -0.351191 | -2.184080 |
| C  | -1.625896  | -0.217952 | -2.282647 |
| C  | -0.803371  | -0.321168 | -1.149766 |
| C  | -1.407100  | -0.570473 | 0.092676  |
| C  | -2.789567  | -0.701037 | 0.189368  |
| C  | -3.587511  | -0.592945 | -0.943149 |
| O  | -4.967299  | -0.747539 | -0.844183 |
| O  | 0.512756   | -0.186029 | -1.342836 |
| H  | -3.637611  | -0.276385 | -3.062178 |
| H  | -1.146659  | -0.029872 | -3.237252 |
| H  | -0.798297  | -0.672298 | 0.983800  |
| H  | -3.258486  | -0.901856 | 1.148096  |
| Si | -5.889333  | 0.591327  | -0.515353 |
| C  | -7.652817  | -0.031361 | -0.484946 |
| C  | -8.724517  | 0.825895  | -0.203079 |
| C  | -10.034079 | 0.356054  | -0.185646 |
| C  | -10.292265 | -0.987306 | -0.450945 |
| C  | -9.239722  | -1.853750 | -0.731787 |
| C  | -7.930026  | -1.378482 | -0.748542 |
| H  | -5.528897  | 1.195087  | 0.791352  |
| H  | -5.720519  | 1.629205  | -1.563542 |
| H  | -8.538444  | 1.877609  | 0.007994  |
| H  | -10.852734 | 1.034391  | 0.035042  |
| H  | -11.313194 | -1.357091 | -0.437428 |
| H  | -9.438430  | -2.901222 | -0.937475 |
| H  | -7.107176  | -2.053769 | -0.966023 |
| B  | 1.495680   | 0.026187  | -0.264844 |
| C  | 1.758392   | -1.303300 | 0.678699  |
| C  | 1.027484   | 1.366239  | 0.582437  |
| C  | 2.942924   | 0.231124  | -1.032597 |
| C  | 2.653977   | -1.212240 | 1.740246  |
| C  | 3.042058   | -2.287994 | 2.522328  |
| C  | 2.532291   | -3.546717 | 2.232726  |
| C  | 1.652111   | -3.695316 | 1.174801  |
| C  | 1.289664   | -2.584544 | 0.414966  |
| C  | 0.969393   | 2.583171  | -0.093497 |
| C  | 0.518094   | 3.765027  | 0.474823  |
| C  | 0.081928   | 3.760497  | 1.791878  |

|   |           |           |           |
|---|-----------|-----------|-----------|
| C | 0.107175  | 2.575975  | 2.506609  |
| C | 0.572692  | 1.417132  | 1.892664  |
| C | 3.315971  | -0.709267 | -1.991886 |
| C | 4.515802  | -0.662377 | -2.690354 |
| C | 5.419076  | 0.354572  | -2.421389 |
| C | 5.106403  | 1.297550  | -1.456945 |
| C | 3.892270  | 1.214750  | -0.782200 |
| F | 3.188417  | -0.017633 | 2.044556  |
| F | 3.900673  | -2.137012 | 3.537633  |
| F | 2.891424  | -4.603930 | 2.968318  |
| F | 1.164744  | -4.907951 | 0.887422  |
| F | 0.446321  | -2.824674 | -0.594926 |
| F | 1.390111  | 2.661804  | -1.363406 |
| F | 2.517798  | -1.749296 | -2.265494 |
| F | 4.818218  | -1.591555 | -3.605068 |
| F | 6.581727  | 0.417557  | -3.078684 |
| F | 5.976862  | 2.276299  | -1.181734 |
| F | 3.686973  | 2.163107  | 0.143679  |
| F | 0.522357  | 0.308550  | 2.654513  |
| F | -0.324552 | 2.554428  | 3.773097  |
| F | -0.360993 | 4.885859  | 2.360575  |
| F | 0.500177  | 4.905763  | -0.223999 |

68

 $[B(C_6F_5)_3-Q-SiEt_3]^+$ 

|   |           |           |           |
|---|-----------|-----------|-----------|
| C | -2.900600 | 0.190591  | -2.566000 |
| C | -1.565430 | 0.267261  | -2.473270 |
| C | -0.902950 | 0.198840  | -1.155280 |
| C | -1.727130 | 0.097131  | 0.068160  |
| C | -3.065040 | 0.041191  | -0.037580 |
| C | -3.700980 | 0.059451  | -1.351350 |
| O | -4.947960 | -0.040239 | -1.499230 |
| O | 0.328530  | 0.229740  | -1.170480 |
| B | 1.609930  | 0.110080  | -0.175270 |
| C | 2.020990  | 1.670710  | -0.184790 |
| C | 2.562240  | -0.932430 | -0.953920 |
| C | 1.201620  | -0.519390 | 1.251750  |
| C | 3.188471  | 2.220640  | -0.710700 |
| C | 3.463561  | 3.582780  | -0.646270 |
| C | 2.543021  | 4.450700  | -0.069300 |
| C | 3.831440  | -1.124040 | -0.413840 |
| C | 4.742140  | -2.041970 | -0.909250 |
| C | 4.374930  | -2.833370 | -1.993010 |
| C | 1.707960  | -0.072340 | 2.469030  |
| C | 1.468890  | -0.737230 | 3.669040  |
| C | 0.696350  | -1.890730 | 3.673700  |
| C | 3.112610  | -2.691810 | -2.549730 |
| C | 2.229560  | -1.756590 | -2.020670 |
| C | 0.168260  | -2.372790 | 2.479750  |
| C | 0.449420  | -1.689140 | 1.309150  |
| C | 1.351041  | 3.949890  | 0.441280  |

|                                                                                     |           |           |           |    |           |           |           |
|-------------------------------------------------------------------------------------|-----------|-----------|-----------|----|-----------|-----------|-----------|
| C                                                                                   | 1.124821  | 2.587670  | 0.365080  | O  | -4.872750 | -0.141239 | -1.698500 |
| F                                                                                   | -0.054069 | 2.134880  | 0.850120  | O  | 0.517570  | 0.045880  | -1.456760 |
| F                                                                                   | 0.449631  | 4.766450  | 0.975810  | B  | 1.469510  | 0.087649  | -0.230320 |
| F                                                                                   | 2.794721  | 5.746560  | -0.015750 | C  | 1.066580  | 1.469939  | 0.545850  |
| F                                                                                   | 4.593841  | 4.062720  | -1.141780 | C  | 2.958540  | 0.082139  | -0.885770 |
| F                                                                                   | 4.105530  | 1.462020  | -1.305190 | C  | 1.367720  | -1.283391 | 0.650090  |
| F                                                                                   | -0.097650 | -2.159130 | 0.164800  | C  | 1.280891  | 2.687879  | -0.097860 |
| F                                                                                   | -0.591800 | -3.463600 | 2.473380  | C  | 0.949941  | 3.918529  | 0.449130  |
| F                                                                                   | 0.448290  | -2.523470 | 4.809150  | C  | 0.357821  | 3.964730  | 1.704260  |
| F                                                                                   | 1.967310  | -0.273870 | 4.806080  | C  | 4.017890  | 0.906449  | -0.524850 |
| F                                                                                   | 2.457180  | 1.027280  | 2.531090  | C  | 5.284010  | 0.803899  | -1.090650 |
| F                                                                                   | 4.193830  | -0.379430 | 0.639610  | C  | 5.528710  | -0.165011 | -2.051670 |
| F                                                                                   | 5.943600  | -2.176460 | -0.363990 | C  | 2.119600  | -1.349641 | 1.821250  |
| F                                                                                   | 5.224040  | -3.721910 | -2.485800 | C  | 2.226490  | -2.487031 | 2.604680  |
| F                                                                                   | 2.746490  | -3.453740 | -3.575580 | C  | 1.567209  | -3.644121 | 2.206550  |
| F                                                                                   | 1.012680  | -1.701200 | -2.599130 | C  | 4.506530  | -1.023971 | -2.430220 |
| H                                                                                   | -3.433330 | 0.203771  | -3.510380 | C  | 3.259390  | -0.889421 | -1.837340 |
| H                                                                                   | -0.908990 | 0.336490  | -3.334680 | C  | 0.819689  | -3.634401 | 1.040720  |
| H                                                                                   | -1.220800 | 0.103420  | 1.024930  | C  | 0.742990  | -2.468401 | 0.284460  |
| H                                                                                   | -3.697890 | -0.016179 | 0.841730  | C  | 0.105601  | 2.781730  | 2.379600  |
| Si                                                                                  | -6.350670 | -0.288859 | -0.348130 | C  | 0.460920  | 1.572280  | 1.792100  |
| C                                                                                   | -6.050860 | -1.977859 | 0.382890  | F  | 0.130270  | 0.470280  | 2.491390  |
| C                                                                                   | -6.229570 | 1.134951  | 0.863320  | F  | -0.487219 | 2.808470  | 3.573410  |
| C                                                                                   | -7.765490 | -0.193559 | -1.545530 | F  | 0.021291  | 5.131960  | 2.244830  |
| C                                                                                   | -7.980630 | 1.193681  | -2.170270 | F  | 1.185911  | 5.048849  | -0.214500 |
| C                                                                                   | -5.605579 | 2.431321  | 0.320270  | F  | 1.843661  | 2.703769  | -1.312190 |
| C                                                                                   | -7.163820 | -2.317199 | 1.394440  | F  | 0.001480  | -2.545710 | -0.835180 |
| H                                                                                   | -5.073220 | -2.022109 | 0.877430  | F  | 0.182379  | -4.738280 | 0.648510  |
| H                                                                                   | -6.030030 | -2.723229 | -0.419840 | F  | 1.651449  | -4.749761 | 2.941330  |
| H                                                                                   | -7.263050 | 1.334601  | 1.177450  | F  | 2.950970  | -2.487751 | 3.721890  |
| H                                                                                   | -5.712330 | 0.809511  | 1.774460  | F  | 2.779880  | -0.257281 | 2.228890  |
| H                                                                                   | -8.670720 | -0.509589 | -1.011450 | F  | 3.864501  | 1.860199  | 0.401950  |
| H                                                                                   | -7.601790 | -0.948899 | -2.323510 | F  | 6.263200  | 1.626648  | -0.716300 |
| H                                                                                   | -7.087960 | 1.539761  | -2.700130 | F  | 6.734860  | -0.274602 | -2.602470 |
| H                                                                                   | -8.234099 | 1.938231  | -1.410510 | F  | 4.733690  | -1.969271 | -3.342680 |
| H                                                                                   | -8.800290 | 1.169591  | -2.890550 | F  | 2.316500  | -1.770291 | -2.208430 |
| H                                                                                   | -4.543529 | 2.307661  | 0.082880  | H  | -3.331850 | 0.112750  | -3.699750 |
| H                                                                                   | -6.108619 | 2.776971  | -0.586000 | H  | -0.818740 | 0.190140  | -3.579900 |
| H                                                                                   | -5.672779 | 3.229461  | 1.061640  | H  | -1.039220 | -0.254230 | 0.722080  |
| H                                                                                   | -8.147750 | -2.338169 | 0.917910  | H  | -3.493820 | -0.313770 | 0.593430  |
| H                                                                                   | -7.200890 | -1.593969 | 2.214570  | Si | -6.116580 | -0.453649 | -0.529410 |
| H                                                                                   | -6.994920 | -3.301819 | 1.833830  | C  | -5.872170 | -2.189969 | 0.128870  |
|                                                                                     |           |           |           | C  | -6.005140 | 0.858431  | 0.813090  |
|                                                                                     |           |           |           | C  | -7.662590 | -0.302759 | -1.564680 |
|                                                                                     |           |           |           | C  | -7.939710 | 1.117871  | -2.075490 |
|                                                                                     |           |           |           | C  | -5.424059 | 2.204531  | 0.351900  |
|                                                                                     |           |           |           | C  | -6.892310 | -2.519859 | 1.231120  |
|                                                                                     |           |           |           | H  | -4.853110 | -2.311859 | 0.514110  |
|                                                                                     |           |           |           | H  | -5.969570 | -2.898349 | -0.701900 |
|                                                                                     |           |           |           | H  | -7.025760 | 1.005481  | 1.191340  |
|                                                                                     |           |           |           | H  | -5.433210 | 0.473631  | 1.666850  |
| 68                                                                                  |           |           |           |    |           |           |           |
| [B(C <sub>6</sub> F <sub>5</sub> ) <sub>3</sub> -Q-SiEt <sub>3</sub> ] <sup>+</sup> |           |           |           |    |           |           |           |
| C                                                                                   | -2.796530 | 0.041840  | -2.759900 |    |           |           |           |
| C                                                                                   | -1.437310 | 0.083870  | -2.696120 |    |           |           |           |
| C                                                                                   | -0.760020 | -0.010290 | -1.432290 |    |           |           |           |
| C                                                                                   | -1.540760 | -0.161920 | -0.234150 |    |           |           |           |
| C                                                                                   | -2.903910 | -0.204930 | -0.310850 |    |           |           |           |
| C                                                                                   | -3.563400 | -0.105340 | -1.568820 |    |           |           |           |

|   |           |           |           |
|---|-----------|-----------|-----------|
| H | -8.511930 | -0.661399 | -0.969600 |
| H | -7.568070 | -0.998959 | -2.406670 |
| H | -7.094570 | 1.502491  | -2.654150 |
| H | -8.119199 | 1.808771  | -1.246180 |
| H | -8.821660 | 1.143581  | -2.720090 |
| H | -4.379509 | 2.105031  | 0.042490  |
| H | -5.977239 | 2.613301  | -0.497740 |
| H | -5.457059 | 2.942591  | 1.156600  |
| H | -7.919810 | -2.450439 | 0.860980  |
| H | -6.799760 | -1.835799 | 2.080400  |
| H | -6.751001 | -3.534259 | 1.610870  |

68

 $[B(C_6F_5)_3-Q-SiEt_3]^-$ 

|    |           |           |           |
|----|-----------|-----------|-----------|
| C  | 2.876570  | 0.529671  | -2.533970 |
| C  | 1.549031  | 0.122700  | -2.492950 |
| C  | 0.696660  | 0.539440  | -1.460980 |
| C  | 1.206150  | 1.413530  | -0.486950 |
| C  | 2.537860  | 1.814130  | -0.527270 |
| C  | 3.382470  | 1.359491  | -1.535070 |
| O  | 4.722530  | 1.709121  | -1.518250 |
| O  | -0.559179 | 0.074540  | -1.473230 |
| Si | 5.802930  | 0.606741  | -0.853080 |
| C  | 7.392430  | 1.596992  | -0.610780 |
| C  | 5.167791  | -0.088399 | 0.779660  |
| C  | 6.105041  | -0.814879 | -2.051850 |
| C  | 7.190551  | -1.775658 | -1.548210 |
| C  | 4.090131  | -1.179069 | 0.668210  |
| C  | 8.249970  | 1.171132  | 0.588190  |
| B  | -1.386389 | -0.052090 | -0.257450 |
| C  | -0.455309 | -0.796410 | 0.886450  |
| C  | -2.693549 | -0.948781 | -0.711350 |
| C  | -2.052250 | 1.370599  | 0.248240  |
| C  | 0.035741  | -2.068890 | 0.600740  |
| C  | 0.945361  | -2.745240 | 1.399640  |
| C  | 1.407291  | -2.138680 | 2.558400  |
| C  | -3.225549 | -2.046861 | -0.046970 |
| C  | -4.352179 | -2.735121 | -0.486290 |
| C  | -5.005579 | -2.316361 | -1.633130 |
| C  | -2.848470 | 1.379939  | 1.389320  |
| C  | -3.548480 | 2.488889  | 1.836140  |
| C  | -3.476350 | 3.667179  | 1.104630  |
| C  | -4.526699 | -1.210901 | -2.319820 |
| C  | -3.399659 | -0.551831 | -1.845560 |
| C  | -2.708170 | 3.706769  | -0.046270 |
| C  | -2.020240 | 2.566519  | -0.457800 |
| C  | 0.959521  | -0.872060 | 2.886100  |
| C  | 0.043611  | -0.235780 | 2.053350  |
| F  | -0.298990 | 1.010000  | 2.428720  |
| F  | 1.423701  | -0.266660 | 3.985420  |
| F  | 2.319861  | -2.751070 | 3.321410  |

|   |           |           |           |
|---|-----------|-----------|-----------|
| F | 1.390771  | -3.962120 | 1.068040  |
| F | -0.374469 | -2.708770 | -0.502800 |
| F | -1.306270 | 2.692700  | -1.581750 |
| F | -2.639891 | 4.839949  | -0.754850 |
| F | -4.143410 | 4.752639  | 1.510640  |
| F | -4.292270 | 2.442679  | 2.947800  |
| F | -2.954849 | 0.257859  | 2.120730  |
| F | -2.668719 | -2.517291 | 1.078750  |
| F | -4.813409 | -3.795401 | 0.188000  |
| F | -6.090279 | -2.965201 | -2.069390 |
| F | -5.163739 | -0.786801 | -3.417930 |
| F | -3.020770 | 0.535609  | -2.529560 |
| H | 3.536581  | 0.199541  | -3.331160 |
| H | 1.140741  | -0.541060 | -3.247510 |
| H | 0.564630  | 1.764080  | 0.314480  |
| H | 2.940550  | 2.473161  | 0.236260  |
| H | 7.103600  | 2.649172  | -0.508250 |
| H | 7.981260  | 1.535342  | -1.534980 |
| H | 6.038471  | -0.491779 | 1.315880  |
| H | 4.798650  | 0.740841  | 1.397000  |
| H | 5.164881  | -1.355969 | -2.210200 |
| H | 6.388531  | -0.397319 | -3.026030 |
| H | 7.345641  | -2.616348 | -2.231240 |
| H | 6.927571  | -2.193789 | -0.570060 |
| H | 8.152501  | -1.263138 | -1.436610 |
| H | 3.153801  | -0.783069 | 0.261020  |
| H | 4.414521  | -1.994389 | 0.012100  |
| H | 3.871341  | -1.619839 | 1.645460  |
| H | 8.529901  | 0.113602  | 0.533180  |
| H | 7.707700  | 1.310592  | 1.528090  |
| H | 9.175640  | 1.751702  | 0.652630  |

125

 $[B(C_6F_5)_3-Q-Si(C_6Me_5)_3]^+$ 

|   |          |          |          |
|---|----------|----------|----------|
| C | -0.78036 | 0.24290  | 0.02108  |
| C | 0.54842  | 0.35023  | 0.17752  |
| C | 1.43589  | 0.25958  | -1.00109 |
| C | 0.85037  | 0.18912  | -2.35049 |
| C | -0.47261 | 0.07551  | -2.50684 |
| C | -1.35920 | 0.07896  | -1.32569 |
| O | -2.56756 | -0.03919 | -1.54511 |
| O | 2.68225  | 0.22793  | -0.95440 |
| B | -3.80932 | -0.01209 | -0.46984 |
| C | -5.09630 | 0.00680  | -1.43600 |
| C | -3.56355 | -1.37249 | 0.37907  |
| C | -3.75923 | 1.39669  | 0.33596  |
| C | -4.71120 | 1.55610  | 1.34230  |
| C | -4.89444 | 2.73393  | 2.04867  |
| C | -4.10449 | 3.83638  | 1.74033  |
| C | -3.15134 | 3.73260  | 0.73927  |
| C | -3.00832 | 2.53045  | 0.05606  |



|    |          |          |          |   |          |          |          |
|----|----------|----------|----------|---|----------|----------|----------|
| C  | -3.26363 | -1.45093 | 1.73565  | C | 1.95163  | 0.75077  | 5.02840  |
| C  | -3.15159 | -2.65313 | 2.42093  | C | 4.23421  | 0.97615  | 3.24488  |
| C  | -3.28571 | -3.84986 | 1.73440  | C | 2.62331  | 2.82374  | 0.50003  |
| C  | -3.55415 | -3.82768 | 0.37177  | C | 3.80210  | 5.27254  | -0.48709 |
| C  | -3.68109 | -2.60294 | -0.26814 | C | 6.68612  | 5.44001  | -0.85530 |
| C  | -6.22909 | -0.78634 | -1.29165 | C | 8.33578  | 3.06027  | -0.60969 |
| C  | -7.33897 | -0.66968 | -2.12060 | C | 7.19251  | 0.59348  | 0.34691  |
| C  | -7.33894 | 0.27613  | -3.13644 | C | 6.53264  | -4.79117 | -0.40402 |
| C  | -6.23256 | 1.09868  | -3.31000 | H | -1.45541 | 0.30665  | 0.86927  |
| C  | -5.15018 | 0.95253  | -2.45676 | H | 0.98040  | 0.50017  | 1.15786  |
| F  | -3.11947 | -5.00006 | 2.36994  | H | 1.54921  | 0.19131  | -3.17962 |
| F  | -3.01079 | -0.33979 | 2.45247  | H | -0.95738 | -0.01197 | -3.47347 |
| F  | -3.66999 | -4.96465 | -0.30278 | H | 7.70993  | -4.85801 | -2.64702 |
| F  | -3.93798 | -2.62988 | -1.57969 | H | 6.28001  | -5.02366 | -3.66615 |
| F  | -5.49188 | 0.51587  | 1.65587  | H | 7.52349  | -3.83767 | -4.06327 |
| F  | -5.80952 | 2.82100  | 3.00496  | H | 5.41172  | -1.77236 | 1.84626  |
| F  | -4.25539 | 4.97324  | 2.40394  | H | 4.67712  | -3.34567 | 1.59285  |
| F  | -2.38032 | 4.77388  | 0.43595  | H | 6.43281  | -3.17325 | 1.60427  |
| F  | -2.05246 | 2.51377  | -0.90315 | H | 5.84298  | -2.83585 | -5.01589 |
| F  | -4.10636 | 1.78272  | -2.63847 | H | 5.21135  | -1.20452 | -4.88643 |
| F  | -6.22296 | 2.01228  | -4.27590 | H | 6.94418  | -1.48639 | -4.74586 |
| F  | -8.38842 | 0.39595  | -3.93658 | H | 5.68423  | 0.55660  | -3.52081 |
| F  | -8.39565 | -1.45540 | -1.94779 | H | 3.98838  | 0.10410  | -3.54970 |
| F  | -6.29562 | -1.71330 | -0.33015 | H | 4.64395  | 1.03886  | -2.19923 |
| F  | -2.82625 | -2.66948 | 3.71466  | H | 2.88643  | -2.33239 | -0.50799 |
| Si | 4.11538  | -0.04896 | 0.22906  | H | 2.25966  | -3.62136 | 0.49463  |
| C  | 4.87296  | 1.66497  | 0.21104  | H | 1.13825  | -2.52197 | -0.27492 |
| C  | 5.05114  | -1.28792 | -0.81613 | H | -0.50016 | -2.71762 | 1.26194  |
| C  | 3.10414  | -0.68163 | 1.67350  | H | 0.56461  | -3.94992 | 1.92507  |
| C  | 2.14557  | -1.70043 | 1.46286  | H | -0.58614 | -3.12473 | 2.97422  |
| C  | 1.13855  | -1.92158 | 2.41806  | H | -0.10271 | -2.37163 | 4.87322  |
| C  | 1.06012  | -1.11112 | 3.56521  | H | 0.04264  | -0.71972 | 5.44489  |
| C  | 2.03743  | -0.12474 | 3.79765  | H | -1.03574 | -1.09918 | 4.10081  |
| C  | 3.09474  | 0.04408  | 2.88476  | H | 0.93727  | 1.12989  | 5.16715  |
| C  | 5.52885  | -2.47922 | -0.22190 | H | 2.21969  | 0.19690  | 5.93467  |
| C  | 6.09854  | -3.47999 | -1.02005 | H | 2.60807  | 1.61633  | 4.96225  |
| C  | 6.26945  | -3.26494 | -2.39817 | H | 4.50229  | 0.84760  | 4.29563  |
| C  | 5.81029  | -2.08023 | -2.99237 | H | 5.13231  | 0.76676  | 2.66267  |
| C  | 5.22202  | -1.07694 | -2.20322 | H | 3.98864  | 2.03368  | 3.09235  |
| C  | 6.27183  | 1.75630  | 0.03823  | H | 2.38847  | 3.71108  | 1.09265  |
| C  | 6.84886  | 2.97368  | -0.35266 | H | 1.93261  | 2.83181  | -0.35527 |
| C  | 6.04651  | 4.11695  | -0.50668 | H | 2.39929  | 1.96429  | 1.13329  |
| C  | 4.66120  | 4.04321  | -0.29478 | H | 4.15307  | 5.86522  | -1.33349 |
| C  | 4.08038  | 2.82876  | 0.09956  | H | 2.76137  | 5.01694  | -0.68669 |
| C  | 6.98292  | -4.29952 | -3.23677 | H | 3.81942  | 5.92234  | 0.39597  |
| C  | 5.50479  | -2.69881 | 1.27788  | H | 7.69203  | 5.51575  | -0.44129 |
| C  | 5.95804  | -1.88951 | -4.48558 | H | 6.76650  | 5.57125  | -1.94110 |
| C  | 4.85569  | 0.22459  | -2.88946 | H | 6.11101  | 6.27920  | -0.46436 |
| C  | 2.11586  | -2.57033 | 0.22274  | H | 8.75298  | 2.09528  | -0.89718 |
| C  | 0.10210  | -2.98315 | 2.14379  | H | 8.55306  | 3.75920  | -1.41869 |
| C  | -0.06459 | -1.32794 | 4.55033  | H | 8.88046  | 3.40593  | 0.27717  |

|                                                                                                                    |          |          |          |    |          |          |          |
|--------------------------------------------------------------------------------------------------------------------|----------|----------|----------|----|----------|----------|----------|
| H                                                                                                                  | 6.71618  | -0.15679 | 0.98192  | Si | 4.03925  | -0.02844 | 0.12327  |
| H                                                                                                                  | 7.54294  | 0.07817  | -0.55402 | C  | 4.94685  | 1.63289  | 0.15017  |
| H                                                                                                                  | 8.06884  | 0.94887  | 0.89399  | C  | 5.04223  | -1.31233 | -0.83837 |
| H                                                                                                                  | 5.95265  | -5.02935 | 0.48775  | C  | 3.10982  | -0.61317 | 1.65549  |
| H                                                                                                                  | 6.39696  | -5.61683 | -1.10375 | C  | 2.14203  | -1.63079 | 1.50628  |
| H                                                                                                                  | 7.59056  | -4.77575 | -0.11552 | C  | 1.15243  | -1.81402 | 2.48629  |
|                                                                                                                    |          |          |          | C  | 1.09847  | -0.96230 | 3.60160  |
| 125                                                                                                                |          |          |          | C  | 2.08712  | 0.02241  | 3.77944  |
| [B(C <sub>6</sub> F <sub>5</sub> ) <sub>3</sub> -Q-Si(C <sub>6</sub> Me <sub>5</sub> ) <sub>3</sub> ] <sup>+</sup> |          |          |          | C  | 3.12675  | 0.15177  | 2.84217  |
| C                                                                                                                  | -0.80448 | 0.29053  | -0.05713 | C  | 5.51696  | -2.49355 | -0.22621 |
| C                                                                                                                  | 0.54947  | 0.40289  | 0.08513  | C  | 6.12861  | -3.49352 | -0.99628 |
| C                                                                                                                  | 1.41589  | 0.19743  | -1.03592 | C  | 6.33965  | -3.29192 | -2.36890 |
| C                                                                                                                  | 0.84517  | -0.07774 | -2.31534 | C  | 5.87805  | -2.12138 | -2.98527 |
| C                                                                                                                  | -0.50405 | -0.17344 | -2.46687 | C  | 5.25312  | -1.11962 | -2.22132 |
| C                                                                                                                  | -1.37800 | 0.00420  | -1.34145 | C  | 6.35551  | 1.66047  | 0.06615  |
| O                                                                                                                  | -2.63594 | -0.08689 | -1.57023 | C  | 7.01923  | 2.85023  | -0.27078 |
| O                                                                                                                  | 2.72387  | 0.26243  | -0.98592 | C  | 6.29011  | 4.03437  | -0.45623 |
| B                                                                                                                  | -3.77278 | -0.01050 | -0.53104 | C  | 4.89345  | 4.02666  | -0.33078 |
| C                                                                                                                  | -5.13456 | -0.08192 | -1.42486 | C  | 4.22893  | 2.83840  | 0.00869  |
| C                                                                                                                  | -3.54699 | -1.31077 | 0.43887  | C  | 7.09653  | -4.32340 | -3.17563 |
| C                                                                                                                  | -3.82069 | 1.44108  | 0.21678  | C  | 5.44073  | -2.71248 | 1.27187  |
| C                                                                                                                  | -4.76953 | 1.61564  | 1.22198  | C  | 6.04877  | -1.94129 | -4.47806 |
| C                                                                                                                  | -5.00540 | 2.82287  | 1.85909  | C  | 4.88132  | 0.16637  | -2.93432 |
| C                                                                                                                  | -4.27883 | 3.94224  | 1.47150  | C  | 2.08177  | -2.53542 | 0.29371  |
| C                                                                                                                  | -3.33887 | 3.82637  | 0.46093  | C  | 0.09978  | -2.87132 | 2.25936  |
| C                                                                                                                  | -3.13691 | 2.59281  | -0.15134 | C  | -0.02077 | -1.12205 | 4.60495  |
| C                                                                                                                  | -3.25526 | -1.30541 | 1.79785  | C  | 2.02195  | 0.95124  | 4.97333  |
| C                                                                                                                  | -3.13306 | -2.46299 | 2.55627  | C  | 4.27908  | 1.08672  | 3.15338  |
| C                                                                                                                  | -3.24514 | -3.70027 | 1.94503  | C  | 2.74678  | 2.89947  | 0.30285  |
| C                                                                                                                  | -3.50397 | -3.76252 | 0.58344  | C  | 4.10500  | 5.29563  | -0.56929 |
| C                                                                                                                  | -3.64327 | -2.58012 | -0.12972 | C  | 7.01484  | 5.32964  | -0.74485 |
| C                                                                                                                  | -6.25181 | -0.86695 | -1.16466 | C  | 8.52222  | 2.85638  | -0.44445 |
| C                                                                                                                  | -7.40173 | -0.83277 | -1.94611 | C  | 7.19880  | 0.45048  | 0.41325  |
| C                                                                                                                  | -7.46623 | 0.02529  | -3.03287 | C  | 6.55607  | -4.79397 | -0.35120 |
| C                                                                                                                  | -6.38321 | 0.84420  | -3.31962 | H  | -1.45666 | 0.44736  | 0.79512  |
| C                                                                                                                  | -5.25693 | 0.78085  | -2.51171 | H  | 0.96632  | 0.63559  | 1.05633  |
| F                                                                                                                  | -3.06823 | -4.81197 | 2.65356  | H  | 1.52691  | -0.21745 | -3.14656 |
| F                                                                                                                  | -3.02895 | -0.15344 | 2.45648  | H  | -0.96717 | -0.38372 | -3.42411 |
| F                                                                                                                  | -3.60799 | -4.94464 | -0.02110 | H  | 7.81731  | -4.86049 | -2.55802 |
| F                                                                                                                  | -3.90924 | -2.69930 | -1.43590 | H  | 6.42352  | -5.06738 | -3.61934 |
| F                                                                                                                  | -5.50607 | 0.56390  | 1.60776  | H  | 7.65384  | -3.85896 | -3.99010 |
| F                                                                                                                  | -5.91787 | 2.92556  | 2.82415  | H  | 5.29404  | -1.78857 | 1.82983  |
| F                                                                                                                  | -4.48497 | 5.11418  | 2.06698  | H  | 4.61586  | -3.37906 | 1.55197  |
| F                                                                                                                  | -2.63884 | 4.89497  | 0.07726  | H  | 6.36597  | -3.16578 | 1.63660  |
| F                                                                                                                  | -2.21645 | 2.57152  | -1.13050 | H  | 6.01126  | -2.89894 | -4.99925 |
| F                                                                                                                  | -4.25621 | 1.62507  | -2.80752 | H  | 5.26153  | -1.31580 | -4.89961 |
| F                                                                                                                  | -6.43974 | 1.68577  | -4.35259 | H  | 7.00758  | -1.46887 | -4.72585 |
| F                                                                                                                  | -8.55938 | 0.06890  | -3.79070 | H  | 5.70115  | 0.48167  | -3.58562 |
| F                                                                                                                  | -8.44130 | -1.61580 | -1.65785 | H  | 3.99716  | 0.03585  | -3.56892 |
| F                                                                                                                  | -6.27494 | -1.71395 | -0.12701 | H  | 4.67747  | 0.99343  | -2.25784 |
| F                                                                                                                  | -2.82000 | -2.39942 | 3.85498  | H  | 2.83760  | -2.31562 | -0.45848 |

|                                                                                                                    |          |          |          |    |          |          |          |
|--------------------------------------------------------------------------------------------------------------------|----------|----------|----------|----|----------|----------|----------|
| H                                                                                                                  | 2.22425  | -3.58036 | 0.59101  | C  | 3.81175  | 2.34280  | -1.90169 |
| H                                                                                                                  | 1.09862  | -2.48191 | -0.18891 | C  | 6.27467  | 0.19521  | -1.48870 |
| H                                                                                                                  | -0.51149 | -2.61775 | 1.38163  | C  | 7.40603  | -0.41650 | -2.01977 |
| H                                                                                                                  | 0.54812  | -3.84880 | 2.05767  | C  | 7.40790  | -1.78439 | -2.23403 |
| H                                                                                                                  | -0.57709 | -2.98310 | 3.10419  | C  | 6.28025  | -2.52094 | -1.90563 |
| H                                                                                                                  | -0.09473 | -2.15683 | 4.94936  | C  | 5.17283  | -1.87082 | -1.37582 |
| H                                                                                                                  | 0.11989  | -0.50013 | 5.48623  | C  | 4.77597  | 0.07031  | 1.91313  |
| H                                                                                                                  | -0.98821 | -0.86645 | 4.16117  | C  | 5.01577  | -0.42865 | 3.18364  |
| H                                                                                                                  | 1.00926  | 1.33580  | 5.11130  | C  | 4.26333  | -1.50406 | 3.63632  |
| H                                                                                                                  | 2.30720  | 0.44282  | 5.90143  | C  | 3.29969  | -2.05193 | 2.80731  |
| H                                                                                                                  | 2.67460  | 1.81445  | 4.85386  | C  | 3.08152  | -1.50629 | 1.54389  |
| H                                                                                                                  | 4.54613  | 1.01240  | 4.20998  | F  | 8.48679  | -2.38897 | -2.74173 |
| H                                                                                                                  | 5.16993  | 0.83096  | 2.58004  | F  | 6.37610  | 1.51961  | -1.30293 |
| H                                                                                                                  | 4.05065  | 2.13792  | 2.94066  | F  | 6.27964  | -3.84693 | -2.08727 |
| H                                                                                                                  | 2.50136  | 3.81771  | 0.84171  | F  | 4.14373  | -2.65584 | -1.03120 |
| H                                                                                                                  | 2.12566  | 2.87450  | -0.60013 | F  | 3.13957  | 2.29169  | 1.62908  |
| H                                                                                                                  | 2.44654  | 2.07239  | 0.94748  | F  | 2.94863  | 4.89147  | 1.16199  |
| H                                                                                                                  | 4.56093  | 5.89896  | -1.35627 | F  | 3.30027  | 5.88320  | -1.35357 |
| H                                                                                                                  | 3.08313  | 5.08067  | -0.88285 | F  | 3.87236  | 4.18036  | -3.40188 |
| H                                                                                                                  | 4.04903  | 5.91959  | 0.33131  | F  | 4.10851  | 1.56089  | -2.94879 |
| H                                                                                                                  | 8.00340  | 5.34346  | -0.28391 | F  | 2.12942  | -2.10720 | 0.81380  |
| H                                                                                                                  | 7.15174  | 5.48558  | -1.82200 | F  | 2.58760  | -3.10410 | 3.23205  |
| H                                                                                                                  | 6.46593  | 6.18839  | -0.35687 | F  | 4.47890  | -2.01405 | 4.85302  |
| H                                                                                                                  | 8.89484  | 1.87640  | -0.74412 | F  | 5.96312  | 0.09527  | 3.96950  |
| H                                                                                                                  | 8.82592  | 3.56505  | -1.21673 | F  | 5.55914  | 1.08167  | 1.50459  |
| H                                                                                                                  | 9.04074  | 3.13727  | 0.48081  | F  | 8.49393  | 0.30192  | -2.32200 |
| H                                                                                                                  | 6.64976  | -0.27025 | 1.02094  | Si | -4.00133 | -0.17184 | 0.04460  |
| H                                                                                                                  | 7.55880  | -0.08551 | -0.47215 | C  | -5.33779 | 1.18620  | -0.06101 |
| H                                                                                                                  | 8.06884  | 0.75683  | 0.99968  | C  | -3.33262 | -0.52852 | 1.79306  |
| H                                                                                                                  | 5.92645  | -5.04159 | 0.50408  | C  | -4.47628 | -1.68277 | -1.01705 |
| H                                                                                                                  | 6.48297  | -5.62565 | -1.05345 | C  | -4.69146 | -2.96581 | -0.47169 |
| H                                                                                                                  | 7.59293  | -4.75465 | 0.00560  | C  | -4.79968 | -4.08816 | -1.30672 |
|                                                                                                                    |          |          |          | C  | -4.76630 | -3.93064 | -2.69992 |
|                                                                                                                    |          |          |          | C  | -4.58047 | -2.65820 | -3.25577 |
|                                                                                                                    |          |          |          | C  | -4.47007 | -1.53109 | -2.42159 |
|                                                                                                                    |          |          |          | C  | -2.11020 | -1.22669 | 1.93977  |
|                                                                                                                    |          |          |          | C  | -1.40843 | -1.17898 | 3.15790  |
|                                                                                                                    |          |          |          | C  | -1.94051 | -0.47869 | 4.24862  |
|                                                                                                                    |          |          |          | C  | -3.17679 | 0.17107  | 4.13193  |
|                                                                                                                    |          |          |          | C  | -3.89343 | 0.10345  | 2.92742  |
|                                                                                                                    |          |          |          | C  | -6.66842 | 0.90134  | -0.42758 |
|                                                                                                                    |          |          |          | C  | -7.53938 | 1.93346  | -0.81205 |
|                                                                                                                    |          |          |          | C  | -7.10935 | 3.26672  | -0.76511 |
|                                                                                                                    |          |          |          | C  | -5.79923 | 3.56588  | -0.36576 |
|                                                                                                                    |          |          |          | C  | -4.92750 | 2.53436  | 0.02051  |
|                                                                                                                    |          |          |          | C  | -1.19802 | -0.46227 | 5.56625  |
|                                                                                                                    |          |          |          | C  | -1.55304 | -2.12031 | 0.84987  |
|                                                                                                                    |          |          |          | C  | -3.72791 | 0.95892  | 5.30166  |
|                                                                                                                    |          |          |          | C  | -5.30628 | 0.65492  | 2.92261  |
|                                                                                                                    |          |          |          | C  | -4.86119 | -3.17431 | 1.01978  |
|                                                                                                                    |          |          |          | C  | -4.93040 | -5.47120 | -0.70536 |
|                                                                                                                    |          |          |          |    |          |          |          |
| 125                                                                                                                |          |          |          |    |          |          |          |
| [B(C <sub>6</sub> F <sub>5</sub> ) <sub>3</sub> -Q-Si(C <sub>6</sub> Me <sub>5</sub> ) <sub>3</sub> ] <sup>-</sup> |          |          |          |    |          |          |          |
| C                                                                                                                  | 0.81866  | 0.59161  | -0.02501 |    |          |          |          |
| C                                                                                                                  | -0.54881 | 0.85057  | 0.06177  |    |          |          |          |
| C                                                                                                                  | -1.42705 | 0.34324  | -0.88992 |    |          |          |          |
| C                                                                                                                  | -0.92873 | -0.41986 | -1.94595 |    |          |          |          |
| C                                                                                                                  | 0.43275  | -0.66085 | -2.04736 |    |          |          |          |
| C                                                                                                                  | 1.33350  | -0.15475 | -1.09668 |    |          |          |          |
| O                                                                                                                  | 2.62825  | -0.43936 | -1.28430 |    |          |          |          |
| O                                                                                                                  | -2.77660 | 0.59301  | -0.80474 |    |          |          |          |
| B                                                                                                                  | 3.73349  | 0.13431  | -0.50270 |    |          |          |          |
| C                                                                                                                  | 3.79702  | -0.42066 | 1.05347  |    |          |          |          |
| C                                                                                                                  | 5.11050  | -0.49348 | -1.16759 |    |          |          |          |
| C                                                                                                                  | 3.66141  | 1.78026  | -0.63609 |    |          |          |          |
| C                                                                                                                  | 3.36718  | 2.69548  | 0.36491  |    |          |          |          |
| C                                                                                                                  | 3.24246  | 4.06460  | 0.15172  |    |          |          |          |
| C                                                                                                                  | 3.41439  | 4.57160  | -1.12446 |    |          |          |          |
| C                                                                                                                  | 3.70182  | 3.70022  | -2.16493 |    |          |          |          |

|   |          |          |          |                                                                                                     |           |           |           |
|---|----------|----------|----------|-----------------------------------------------------------------------------------------------------|-----------|-----------|-----------|
| C | -4.96843 | -5.12924 | -3.60141 | H                                                                                                   | -9.27083  | 2.32068   | -2.05056  |
| C | -4.48155 | -2.49784 | -4.75770 | H                                                                                                   | -6.64366  | -1.13777  | 0.31740   |
| C | -4.42174 | -0.16882 | -3.08972 | H                                                                                                   | -8.24991  | -0.49001  | 0.02756   |
| C | -3.57834 | 2.91618  | 0.59603  | H                                                                                                   | -7.23602  | -1.00883  | -1.32911  |
| C | -5.31713 | 5.00078  | -0.36966 | H                                                                                                   | 0.38062   | -2.09106  | 2.33404   |
| C | -8.07117 | 4.38554  | -1.10246 | H                                                                                                   | 0.63728   | -1.23476  | 3.84267   |
| C | -8.93577 | 1.60559  | -1.29682 | H                                                                                                   | -0.14871  | -2.81066  | 3.84969   |
| C | -7.22543 | -0.50639 | -0.35453 |                                                                                                     |           |           |           |
| C | -0.07053 | -1.86572 | 3.29756  | 80                                                                                                  |           |           |           |
| H | 1.47897  | 0.96453  | 0.74939  | B(C <sub>6</sub> F <sub>5</sub> ) <sub>3</sub> -Q-B(C <sub>6</sub> F <sub>5</sub> ) <sub>2</sub> Ph |           |           |           |
| H | -0.94367 | 1.41884  | 0.89857  | C                                                                                                   | -0.699266 | -0.347938 | 0.848052  |
| H | -1.62356 | -0.84669 | -2.66335 | C                                                                                                   | 0.602770  | -0.461724 | 1.130761  |
| H | 0.83973  | -1.25218 | -2.86061 | C                                                                                                   | 1.631629  | -0.236222 | 0.096029  |
| H | -0.58596 | -1.35636 | 5.68849  | C                                                                                                   | 1.226988  | 0.181504  | -1.261412 |
| H | -0.52757 | 0.40309  | 5.64008  | C                                                                                                   | -0.075206 | 0.298377  | -1.543063 |
| H | -1.88554 | -0.41863 | 6.41306  | C                                                                                                   | -1.099638 | 0.050339  | -0.515821 |
| H | -2.19258 | -2.16294 | -0.03138 | O                                                                                                   | -2.277374 | 0.218654  | -0.860922 |
| H | -0.55825 | -1.80875 | 0.51783  | B                                                                                                   | -3.622837 | 0.069825  | 0.029964  |
| H | -1.46174 | -3.14396 | 1.23378  | C                                                                                                   | -3.719804 | -1.446541 | 0.604675  |
| H | -2.92201 | 1.40250  | 5.88911  | C                                                                                                   | -3.467177 | 1.268698  | 1.113151  |
| H | -4.36673 | 1.77715  | 4.96580  | C                                                                                                   | -4.797376 | 0.245073  | -1.064766 |
| H | -4.32320 | 0.33464  | 5.98098  | C                                                                                                   | -4.789259 | -1.716148 | 1.456893  |
| H | -5.78034 | 0.47501  | 3.89088  | C                                                                                                   | -5.088764 | -2.980214 | 1.937350  |
| H | -5.34869 | 1.73297  | 2.72545  | C                                                                                                   | -4.299033 | -4.055826 | 1.546297  |
| H | -5.92582 | 0.17097  | 2.16801  | C                                                                                                   | -3.230414 | -3.841629 | 0.690458  |
| H | -5.13202 | -2.25517 | 1.53859  | C                                                                                                   | -2.970621 | -2.554256 | 0.232376  |
| H | -5.65000 | -3.90584 | 1.21604  | C                                                                                                   | -3.266106 | 1.109907  | 2.480194  |
| H | -3.94244 | -3.53969 | 1.49460  | C                                                                                                   | -3.144929 | 2.173184  | 3.367248  |
| H | -4.44625 | -5.52643 | 0.27049  | C                                                                                                   | -3.221058 | 3.470878  | 2.884885  |
| H | -5.97895 | -5.76637 | -0.56842 | C                                                                                                   | -3.402636 | 3.685004  | 1.524307  |
| H | -4.45826 | -6.22419 | -1.33882 | C                                                                                                   | -3.514055 | 2.592758  | 0.677538  |
| H | -5.60529 | -5.87908 | -3.12920 | C                                                                                                   | -5.937746 | 1.024872  | -0.908776 |
| H | -5.44815 | -4.84454 | -4.53920 | C                                                                                                   | -6.950152 | 1.076774  | -1.860114 |
| H | -4.01792 | -5.61625 | -3.85303 | C                                                                                                   | -6.843143 | 0.318574  | -3.016947 |
| H | -4.03073 | -3.37718 | -5.22115 | C                                                                                                   | -5.729138 | -0.488167 | -3.207614 |
| H | -5.46431 | -2.34657 | -5.22306 | C                                                                                                   | -4.745369 | -0.514497 | -2.230634 |
| H | -3.86170 | -1.64099 | -5.02417 | F                                                                                                   | -5.574906 | -0.703141 | 1.842115  |
| H | -5.14524 | -0.13523 | -3.91013 | F                                                                                                   | -6.117030 | -3.175797 | 2.755989  |
| H | -4.66335 | 0.64355  | -2.40829 | F                                                                                                   | -4.564757 | -5.276946 | 1.993147  |
| H | -3.43492 | 0.05522  | -3.50927 | F                                                                                                   | -2.463501 | -4.860495 | 0.309761  |
| H | -3.67017 | 3.81801  | 1.20769  | F                                                                                                   | -1.911228 | -2.428631 | -0.595578 |
| H | -3.18126 | 2.12993  | 1.23971  | F                                                                                                   | -3.125824 | -0.116972 | 3.014913  |
| H | -2.83134 | 3.10193  | -0.18266 | F                                                                                                   | -6.111689 | 1.773458  | 0.185252  |
| H | -5.79387 | 5.57573  | -1.16592 | F                                                                                                   | -8.019449 | 1.844925  | -1.669329 |
| H | -5.53013 | 5.51192  | 0.57812  | F                                                                                                   | -7.801906 | 0.360283  | -3.934802 |
| H | -4.24056 | 5.05530  | -0.53428 | F                                                                                                   | -5.621088 | -1.228854 | -4.308538 |
| H | -9.10056 | 4.11090  | -0.86613 | F                                                                                                   | -3.699802 | -1.333675 | -2.437626 |
| H | -7.84194 | 5.28981  | -0.53637 | F                                                                                                   | -3.677420 | 2.851968  | -0.624971 |
| H | -8.03713 | 4.64836  | -2.16742 | F                                                                                                   | -3.461538 | 4.925079  | 1.049772  |
| H | -8.97465 | 0.61635  | -1.75513 | F                                                                                                   | -3.103610 | 4.499776  | 3.712976  |
| H | -9.67175 | 1.61816  | -0.48228 | F                                                                                                   | -2.944621 | 1.953564  | 4.663632  |

|                                                                                                                    |           |           |           |   |           |           |           |
|--------------------------------------------------------------------------------------------------------------------|-----------|-----------|-----------|---|-----------|-----------|-----------|
| O                                                                                                                  | 2.803481  | -0.423709 | 0.438248  | C | 3.299689  | 1.533166  | -0.703475 |
| B                                                                                                                  | 4.167879  | -0.387446 | -0.485518 | C | 4.468878  | 0.030913  | 1.273381  |
| C                                                                                                                  | 4.474389  | 1.164686  | -0.857718 | C | 4.831656  | -1.203256 | -1.607057 |
| C                                                                                                                  | 3.820003  | -1.357127 | -1.723195 | C | 5.280242  | -2.286196 | -2.344762 |
| C                                                                                                                  | 5.261373  | -0.925557 | 0.572750  | C | 4.543864  | -3.464020 | -2.326721 |
| C                                                                                                                  | 5.687073  | 1.408851  | -1.502592 | C | 3.382608  | -3.529094 | -1.575522 |
| C                                                                                                                  | 6.136865  | 2.675856  | -1.843820 | C | 2.969558  | -2.414641 | -0.849190 |
| C                                                                                                                  | 5.357962  | 3.779946  | -1.520287 | C | 3.272351  | 1.728683  | -2.078191 |
| C                                                                                                                  | 4.148437  | 3.591655  | -0.869910 | C | 3.187911  | 2.981016  | -2.677489 |
| C                                                                                                                  | 3.739526  | 2.302095  | -0.549399 | C | 3.123217  | 4.112293  | -1.881556 |
| C                                                                                                                  | 3.247407  | -2.614047 | -1.472056 | C | 3.135184  | 3.972736  | -0.500701 |
| C                                                                                                                  | 2.878418  | -3.468580 | -2.505447 | C | 3.215974  | 2.702651  | 0.049878  |
| C                                                                                                                  | 3.081887  | -3.084593 | -3.829272 | C | 5.577839  | 0.858511  | 1.405133  |
| C                                                                                                                  | 3.659090  | -1.848918 | -4.103735 | C | 6.522513  | 0.709996  | 2.415075  |
| C                                                                                                                  | 4.022187  | -0.998219 | -3.060641 | C | 6.382692  | -0.313257 | 3.338636  |
| C                                                                                                                  | 5.336816  | -0.353084 | 1.840487  | C | 5.304390  | -1.179504 | 3.235151  |
| C                                                                                                                  | 6.267335  | -0.730387 | 2.796605  | C | 4.386319  | -0.997837 | 2.209553  |
| C                                                                                                                  | 7.193508  | -1.715802 | 2.478838  | F | 5.583060  | -0.091807 | -1.632379 |
| C                                                                                                                  | 7.173389  | -2.297458 | 1.219903  | F | 6.406246  | -2.218462 | -3.058873 |
| C                                                                                                                  | 6.219739  | -1.893767 | 0.290313  | F | 4.955309  | -4.522477 | -3.025676 |
| F                                                                                                                  | 6.472628  | 0.373044  | -1.824625 | F | 2.674261  | -4.659709 | -1.546913 |
| F                                                                                                                  | 7.298934  | 2.843460  | -2.466470 | F | 1.842863  | -2.566819 | -0.138615 |
| F                                                                                                                  | 5.765506  | 5.002855  | -1.836450 | F | 3.284594  | 0.683500  | -2.925571 |
| F                                                                                                                  | 3.389702  | 4.638212  | -0.554455 | F | 5.798463  | 1.864815  | 0.548786  |
| F                                                                                                                  | 2.548912  | 2.211931  | 0.084960  | F | 7.564221  | 1.541474  | 2.501460  |
| F                                                                                                                  | 4.477005  | 0.623638  | 2.176025  | F | 7.280686  | -0.469521 | 4.312611  |
| F                                                                                                                  | 6.287988  | -0.158341 | 3.999214  | F | 5.170817  | -2.181051 | 4.108494  |
| F                                                                                                                  | 8.097446  | -2.094072 | 3.375788  | F | 3.393729  | -1.895419 | 2.131546  |
| F                                                                                                                  | 8.067921  | -3.233125 | 0.910163  | F | 3.233411  | 2.632087  | 1.387348  |
| F                                                                                                                  | 6.272237  | -2.477894 | -0.907587 | F | 3.072146  | 5.055907  | 0.275621  |
| H                                                                                                                  | -1.470789 | -0.541204 | 1.585495  | F | 3.042466  | 5.321653  | -2.434788 |
| H                                                                                                                  | 0.970657  | -0.745843 | 2.110750  | F | 3.158733  | 3.099372  | -4.006877 |
| H                                                                                                                  | 2.004309  | 0.364575  | -1.993317 | O | -2.969261 | 0.005847  | -1.271416 |
| H                                                                                                                  | -0.443855 | 0.593608  | -2.519071 | B | -4.321559 | -0.064815 | -0.553221 |
| H                                                                                                                  | 3.099942  | -2.937666 | -0.442440 | C | -4.556245 | 1.259115  | 0.392178  |
| H                                                                                                                  | 2.439090  | -4.435388 | -2.280458 | C | -4.351416 | -1.509376 | 0.232247  |
| H                                                                                                                  | 2.796860  | -3.747311 | -4.639899 | C | -5.439887 | 0.024762  | -1.719611 |
| H                                                                                                                  | 3.828310  | -1.544524 | -5.131924 | C | -5.664861 | 1.311007  | 1.234623  |
| H                                                                                                                  | 4.466822  | -0.035948 | -3.300780 | C | -6.028754 | 2.429055  | 1.967986  |
|                                                                                                                    |           |           |           | C | -5.271365 | 3.587422  | 1.857961  |
|                                                                                                                    |           |           |           | C | -4.170418 | 3.597202  | 1.018910  |
|                                                                                                                    |           |           |           | C | -3.843046 | 2.449198  | 0.302524  |
|                                                                                                                    |           |           |           | C | -4.386586 | -2.675628 | -0.533688 |
|                                                                                                                    |           |           |           | C | -4.438472 | -3.953137 | 0.009985  |
|                                                                                                                    |           |           |           | C | -4.438449 | -4.106486 | 1.388319  |
|                                                                                                                    |           |           |           | C | -4.374847 | -2.981852 | 2.194890  |
|                                                                                                                    |           |           |           | C | -4.327666 | -1.723401 | 1.606220  |
|                                                                                                                    |           |           |           | C | -5.199971 | 0.807951  | -2.855770 |
|                                                                                                                    |           |           |           | C | -6.161713 | 0.965477  | -3.850150 |
|                                                                                                                    |           |           |           | C | -7.401442 | 0.343111  | -3.726379 |
|                                                                                                                    |           |           |           | C | -7.665437 | -0.433170 | -2.601280 |
| 80                                                                                                                 |           |           |           |   |           |           |           |
| [B(C <sub>6</sub> F <sub>5</sub> ) <sub>3</sub> -Q-B(C <sub>6</sub> F <sub>5</sub> ) <sub>2</sub> Ph] <sup>-</sup> |           |           |           |   |           |           |           |
| C                                                                                                                  | 0.602938  | -0.070172 | -1.146490 |   |           |           |           |
| C                                                                                                                  | -0.677035 | -0.057591 | -1.614124 |   |           |           |           |
| C                                                                                                                  | -1.800522 | -0.011122 | -0.725574 |   |           |           |           |
| C                                                                                                                  | -1.562609 | 0.018976  | 0.686997  |   |           |           |           |
| C                                                                                                                  | -0.281810 | 0.008560  | 1.153884  |   |           |           |           |
| C                                                                                                                  | 0.839892  | -0.026657 | 0.265060  |   |           |           |           |
| O                                                                                                                  | 2.012367  | -0.020351 | 0.811626  |   |           |           |           |
| B                                                                                                                  | 3.344690  | 0.095260  | 0.084507  |   |           |           |           |
| C                                                                                                                  | 3.661516  | -1.210192 | -0.851876 |   |           |           |           |

|                                                                                                                     |           |           |           |   |           |           |           |
|---------------------------------------------------------------------------------------------------------------------|-----------|-----------|-----------|---|-----------|-----------|-----------|
| C                                                                                                                   | -6.695105 | -0.585696 | -1.613722 | F | 5.354670  | -4.369492 | -3.039408 |
| F                                                                                                                   | -6.447291 | 0.228475  | 1.368579  | F | 3.072790  | -4.694745 | -1.596260 |
| F                                                                                                                   | -7.098270 | 2.410034  | 2.767830  | F | 2.063230  | -2.683971 | -0.180420 |
| F                                                                                                                   | -5.604134 | 4.677967  | 2.550702  | F | 3.279918  | 0.688925  | -2.914262 |
| F                                                                                                                   | -3.438687 | 4.707303  | 0.896043  | F | 5.696372  | 2.024061  | 0.568288  |
| F                                                                                                                   | -2.773646 | 2.558974  | -0.505586 | F | 7.511875  | 1.804809  | 2.480567  |
| F                                                                                                                   | -4.362334 | -2.605225 | -1.868474 | F | 7.419464  | -0.253961 | 4.262134  |
| F                                                                                                                   | -4.214293 | -0.692479 | 2.463992  | F | 5.444194  | -2.119563 | 4.060676  |
| F                                                                                                                   | -4.350499 | -3.116616 | 3.523064  | F | 3.617957  | -1.944698 | 2.128821  |
| F                                                                                                                   | -4.485964 | -5.322955 | 1.931102  | F | 3.118950  | 2.632304  | 1.403472  |
| F                                                                                                                   | -4.482568 | -5.031417 | -0.775600 | F | 2.800036  | 5.038611  | 0.292517  |
| H                                                                                                                   | 1.440923  | -0.125858 | -1.831145 | F | 2.740581  | 5.303202  | -2.419001 |
| H                                                                                                                   | -0.895205 | -0.093354 | -2.675677 | F | 2.991211  | 3.090967  | -3.992789 |
| H                                                                                                                   | -2.401197 | 0.063961  | 1.371232  | O | -3.034688 | -0.007317 | -1.304087 |
| H                                                                                                                   | -0.063169 | 0.037409  | 2.215473  | B | -4.307886 | -0.114397 | -0.588842 |
| H                                                                                                                   | -4.235610 | 1.299747  | -2.961527 | C | -4.643304 | 1.214815  | 0.361194  |
| H                                                                                                                   | -5.944247 | 1.574592  | -4.723328 | C | -4.347731 | -1.548751 | 0.254646  |
| H                                                                                                                   | -8.154640 | 0.462039  | -4.499883 | C | -5.484246 | -0.087871 | -1.723823 |
| H                                                                                                                   | -8.628723 | -0.924248 | -2.493871 | C | -5.731392 | 1.237748  | 1.229388  |
| H                                                                                                                   | -6.917970 | -1.196003 | -0.741431 | C | -6.140445 | 2.354881  | 1.941855  |
|                                                                                                                     |           |           |           | C | -5.451074 | 3.547316  | 1.782318  |
| 80                                                                                                                  |           |           |           | C | -4.372453 | 3.588966  | 0.916386  |
| [B(C <sub>6</sub> F <sub>5</sub> ) <sub>3</sub> -Q-B(C <sub>6</sub> F <sub>5</sub> ) <sub>2</sub> Ph] <sup>2-</sup> |           |           |           | C | -3.996077 | 2.440027  | 0.223033  |
| C                                                                                                                   | 0.594073  | -0.195663 | -1.100629 | C | -4.390903 | -2.734298 | -0.479321 |
| C                                                                                                                   | -0.708979 | -0.165645 | -1.586522 | C | -4.415719 | -4.000163 | 0.094060  |
| C                                                                                                                   | -1.810187 | -0.038882 | -0.733233 | C | -4.377988 | -4.123781 | 1.473682  |
| C                                                                                                                   | -1.564750 | 0.060344  | 0.641967  | C | -4.309692 | -2.979919 | 2.250068  |
| C                                                                                                                   | -0.260124 | 0.033028  | 1.127475  | C | -4.289942 | -1.734359 | 1.631234  |
| C                                                                                                                   | 0.838510  | -0.093857 | 0.274489  | C | -5.242154 | 0.553867  | -2.945853 |
| O                                                                                                                   | 2.069157  | -0.129477 | 0.843776  | C | -6.225501 | 0.658403  | -3.927105 |
| B                                                                                                                   | 3.314302  | 0.083115  | 0.119863  | C | -7.491559 | 0.118128  | -3.711482 |
| C                                                                                                                   | 3.778156  | -1.179972 | -0.850491 | C | -7.756539 | -0.525694 | -2.505295 |
| C                                                                                                                   | 3.224447  | 1.527227  | -0.686213 | C | -6.765258 | -0.621956 | -1.530534 |
| C                                                                                                                   | 4.504755  | 0.085454  | 1.278548  | F | -6.465078 | 0.124628  | 1.422757  |
| C                                                                                                                   | 4.952900  | -1.080429 | -1.589423 | F | -7.195215 | 2.304103  | 2.770217  |
| C                                                                                                                   | 5.494777  | -2.117184 | -2.331970 | F | -5.830826 | 4.644478  | 2.452748  |
| C                                                                                                                   | 4.850620  | -3.346531 | -2.335617 | F | -3.710808 | 4.741204  | 0.745492  |
| C                                                                                                                   | 3.687739  | -3.505252 | -1.601938 | F | -2.961219 | 2.593249  | -0.610374 |
| C                                                                                                                   | 3.177143  | -2.433524 | -0.869969 | F | -4.417948 | -2.705692 | -1.817037 |
| C                                                                                                                   | 3.181874  | 1.723707  | -2.059251 | F | -4.193999 | -0.688261 | 2.472280  |
| C                                                                                                                   | 3.020700  | 2.969146  | -2.658613 | F | -4.261901 | -3.087578 | 3.585233  |
| C                                                                                                                   | 2.887320  | 4.093904  | -1.864214 | F | -4.405281 | -5.333617 | 2.047785  |
| C                                                                                                                   | 2.914384  | 3.953758  | -0.484629 | F | -4.477670 | -5.102791 | -0.665769 |
| C                                                                                                                   | 3.072874  | 2.690252  | 0.064927  | H | 1.420346  | -0.305186 | -1.796218 |
| C                                                                                                                   | 5.554515  | 0.987365  | 1.408324  | H | -0.902528 | -0.245980 | -2.651840 |
| C                                                                                                                   | 6.529002  | 0.896025  | 2.397846  | H | -2.390140 | 0.167200  | 1.337183  |
| C                                                                                                                   | 6.487529  | -0.148308 | 3.304948  | H | -0.066464 | 0.111458  | 2.192823  |
| C                                                                                                                   | 5.476299  | -1.090523 | 3.202430  | H | -4.251340 | 0.965368  | -3.118858 |
| C                                                                                                                   | 4.523934  | -0.963085 | 2.198254  | H | -6.003091 | 1.160062  | -4.866328 |
| F                                                                                                                   | 5.627575  | 0.083405  | -1.598785 | H | -8.261377 | 0.195040  | -4.475467 |
| F                                                                                                                   | 6.628012  | -1.958731 | -3.032223 | H | -8.738446 | -0.957572 | -2.324443 |

H -6.990014 -1.129516 -0.595080

80

$B(C_6F_5)_3-Q-B(C_6F_5)Ph_2$

C 0.244892 -0.284728 -1.029642  
 C -1.028406 -0.424495 -1.413627  
 C -2.134371 -0.392697 -0.432642  
 C -1.835238 -0.141100 0.993159  
 C -0.561894 0.009232 1.374417  
 C 0.535783 -0.053294 0.397951  
 O 1.679891 0.121195 0.843346  
 B 3.080613 0.157757 0.039338  
 C 3.303367 -1.258626 -0.725117  
 C 2.929845 1.484957 -0.884018  
 C 4.173991 0.236209 1.227017  
 C 4.438037 -1.355777 -1.528564  
 C 4.841290 -2.525884 -2.150432  
 C 4.093360 -3.682806 -1.961788  
 C 2.962657 -3.641013 -1.161897  
 C 2.598840 -2.442806 -0.556286  
 C 2.822772 1.505356 -2.270478  
 C 2.695873 2.673080 -3.013900  
 C 2.668483 3.894720 -2.358838  
 C 2.754396 3.929133 -0.972781  
 C 2.875012 2.737725 -0.273674  
 C 5.276122 1.083163 1.259385  
 C 6.221929 1.049676 2.277814  
 C 6.085234 0.133446 3.310342  
 C 5.008543 -0.743240 3.310841  
 C 4.091298 -0.679456 2.272820  
 F 5.185455 -0.261681 -1.720233  
 F 5.928921 -2.556397 -2.913793  
 F 4.457665 -4.817129 -2.547186  
 F 2.235541 -4.739896 -0.974109  
 F 1.484698 -2.484561 0.204892  
 F 2.786364 0.358303 -2.972981  
 F 5.476085 1.985035 0.292716  
 F 7.256072 1.886921 2.268709  
 F 6.980530 0.091673 4.290520  
 F 4.873286 -1.634155 4.291030  
 F 3.082835 -1.567754 2.294036  
 F 2.943562 2.824010 1.059818  
 F 2.714360 5.094242 -0.334149  
 F 2.543361 5.020734 -3.048562  
 F 2.587774 2.623418 -4.338953  
 O -3.269658 -0.578637 -0.875784  
 B -4.729751 -0.815632 -0.062710  
 C -5.237525 0.672323 0.359712  
 C -4.363254 -1.791922 1.162926  
 C -5.607471 -1.450881 -1.242638  
 C -6.547142 0.756417 0.836321

C -7.158489 1.945495 1.205915  
 C -6.449324 3.135428 1.098848  
 C -5.143798 3.106529 0.636462  
 C -4.571772 1.889122 0.282226  
 C -3.615437 -2.956949 0.922980  
 C -3.238068 -3.810415 1.955622  
 C -3.616423 -3.524064 3.265754  
 C -4.376328 -2.387953 3.527545  
 C -4.741718 -1.535068 2.486685  
 C -5.738660 -0.775604 -2.464682  
 C -6.502110 -1.292714 -3.505123  
 C -7.168661 -2.505659 -3.337821  
 C -7.063129 -3.188235 -2.130277  
 C -6.287143 -2.664673 -1.097265  
 F -7.264723 -0.363632 0.975069  
 F -8.408310 1.958716 1.659718  
 F -7.013421 4.286483 1.446658  
 F -4.444546 4.235504 0.536315  
 F -3.289176 1.961791 -0.146423  
 H 1.070318 -0.340225 -1.731006  
 H -1.316184 -0.598694 -2.444868  
 H -2.665274 -0.089194 1.687122  
 H -0.272253 0.198463 2.401964  
 H -3.334625 -3.206982 -0.099380  
 H -2.656449 -4.701245 1.739407  
 H -3.326183 -4.186355 4.075010  
 H -4.684462 -2.162994 4.543980  
 H -5.325980 -0.647511 2.716310  
 H -5.230539 0.177991 -2.602847  
 H -6.584350 -0.751592 -4.442896  
 H -7.769703 -2.912927 -4.144912  
 H -7.584946 -4.130126 -1.991331  
 H -6.214733 -3.206046 -0.157558

80

$[B(C_6F_5)_3-Q-B(C_6F_5)Ph_2]^-$

C -0.239121 -0.475321 0.976127  
 C 1.050455 -0.643313 1.385542  
 C 2.150317 -0.530251 0.472669  
 C 1.872583 -0.228057 -0.901109  
 C 0.584107 -0.057541 -1.309261  
 C -0.510797 -0.166475 -0.394313  
 O -1.696165 0.023507 -0.882447  
 B -2.989952 0.110144 -0.092210  
 C -3.390655 -1.311101 0.618214  
 C -2.809358 1.379468 0.932126  
 C -4.149770 0.340149 -1.227070  
 C -4.534655 -1.347415 1.411558  
 C -5.050892 -2.505154 1.969615  
 C -4.415573 -3.714490 1.717797  
 C -3.284952 -3.735419 0.919039

|   |           |           |           |                                                                                                                     |           |           |           |
|---|-----------|-----------|-----------|---------------------------------------------------------------------------------------------------------------------|-----------|-----------|-----------|
| C | -2.800981 | -2.546058 | 0.378897  | H                                                                                                                   | -1.059698 | -0.586147 | 1.675098  |
| C | -2.729948 | 1.326130  | 2.317662  | H                                                                                                                   | 1.293207  | -0.880682 | 2.415448  |
| C | -2.527644 | 2.442398  | 3.122468  | H                                                                                                                   | 2.698116  | -0.137482 | -1.595723 |
| C | -2.391128 | 3.688345  | 2.534270  | H                                                                                                                   | 0.338793  | 0.176341  | -2.339121 |
| C | -2.450542 | 3.796756  | 1.151926  | H                                                                                                                   | 3.985870  | -3.423421 | 0.610316  |
| C | -2.649449 | 2.654052  | 0.391831  | H                                                                                                                   | 3.592061  | -5.302602 | -0.940495 |
| C | -5.187734 | 1.263186  | -1.174391 | H                                                                                                                   | 3.873664  | -4.977156 | -3.388421 |
| C | -6.167013 | 1.364848  | -2.156978 | H                                                                                                                   | 4.542527  | -2.747824 | -4.255533 |
| C | -6.138323 | 0.506633  | -3.244133 | H                                                                                                                   | 4.912748  | -0.875882 | -2.708599 |
| C | -5.134956 | -0.447085 | -3.330218 | H                                                                                                                   | 4.834862  | 0.113555  | 2.793524  |
| C | -4.178931 | -0.516729 | -2.325738 | H                                                                                                                   | 6.478495  | -0.352152 | 4.577634  |
| F | -5.190603 | -0.203676 | 1.661280  | H                                                                                                                   | 8.353962  | -1.928493 | 4.160995  |
| F | -6.147318 | -2.477246 | 2.731528  | H                                                                                                                   | 8.560198  | -3.026088 | 1.942869  |
| F | -4.893806 | -4.844894 | 2.240099  | H                                                                                                                   | 6.906678  | -2.558656 | 0.168188  |
| F | -2.674081 | -4.895149 | 0.666423  |                                                                                                                     |           |           |           |
| F | -1.711612 | -2.657887 | -0.393167 |                                                                                                                     |           |           |           |
| F | -2.806050 | 0.151900  | 2.970272  | 80                                                                                                                  |           |           |           |
| F | -5.301136 | 2.123381  | -0.153628 | [B(C <sub>6</sub> F <sub>5</sub> ) <sub>3</sub> -Q-B(C <sub>6</sub> F <sub>5</sub> )Ph <sub>2</sub> ] <sup>2-</sup> |           |           |           |
| F | -7.136498 | 2.279051  | -2.061090 | C                                                                                                                   | -0.243870 | -0.599331 | 0.904888  |
| F | -7.070901 | 0.590917  | -4.194675 | C                                                                                                                   | 1.071543  | -0.754869 | 1.333533  |
| F | -5.109195 | -1.292325 | -4.364401 | C                                                                                                                   | 2.157398  | -0.548553 | 0.475781  |
| F | -3.264845 | -1.490344 | -2.440055 | C                                                                                                                   | 1.879453  | -0.170656 | -0.844845 |
| F | -2.708155 | 2.823525  | -0.935623 | C                                                                                                                   | 0.565885  | -0.012741 | -1.273629 |
| F | -2.319833 | 4.992857  | 0.574903  | C                                                                                                                   | -0.516261 | -0.222664 | -0.414794 |
| F | -2.197978 | 4.771401  | 3.286428  | O                                                                                                                   | -1.762357 | -0.064550 | -0.932619 |
| F | -2.455053 | 2.321336  | 4.450217  | B                                                                                                                   | -2.968230 | 0.091288  | -0.135548 |
| O | 3.329816  | -0.696437 | 0.960066  | C                                                                                                                   | -3.502127 | -1.297823 | 0.600122  |
| B | 4.668604  | -0.818745 | 0.184441  | C                                                                                                                   | -2.754506 | 1.348267  | 0.922155  |
| C | 5.096144  | 0.643675  | -0.444374 | C                                                                                                                   | -4.184219 | 0.390856  | -1.228509 |
| C | 4.479737  | -1.996194 | -0.919514 | C                                                                                                                   | -4.646169 | -1.260381 | 1.390937  |
| C | 5.742845  | -1.187242 | 1.342937  | C                                                                                                                   | -5.244779 | -2.379792 | 1.946672  |
| C | 6.285440  | 0.733346  | -1.168500 | C                                                                                                                   | -4.695102 | -3.628671 | 1.693259  |
| C | 6.795395  | 1.918000  | -1.680725 | C                                                                                                                   | -3.567697 | -3.724369 | 0.896093  |
| C | 6.112468  | 3.104414  | -1.455103 | C                                                                                                                   | -2.997484 | -2.570793 | 0.358151  |
| C | 4.937219  | 3.076594  | -0.723821 | C                                                                                                                   | -2.660285 | 1.277362  | 2.304830  |
| C | 4.461855  | 1.863776  | -0.232473 | C                                                                                                                   | -2.391341 | 2.372675  | 3.119926  |
| C | 4.104304  | -3.268737 | -0.460571 | C                                                                                                                   | -2.196646 | 3.616100  | 2.545788  |
| C | 3.885926  | -4.332289 | -1.330849 | C                                                                                                                   | -2.271431 | 3.742565  | 1.166725  |
| C | 4.043564  | -4.151677 | -2.703426 | C                                                                                                                   | -2.537454 | 2.619835  | 0.396929  |
| C | 4.417753  | -2.902324 | -3.187332 | C                                                                                                                   | -5.166309 | 1.371684  | -1.153502 |
| C | 4.630490  | -1.845681 | -2.302956 | C                                                                                                                   | -6.167687 | 1.531931  | -2.106896 |
| C | 5.653937  | -0.576989 | 2.602120  | C                                                                                                                   | -6.225493 | 0.672103  | -3.189788 |
| C | 6.577430  | -0.837459 | 3.610269  | C                                                                                                                   | -5.285418 | -0.340578 | -3.297417 |
| C | 7.629923  | -1.720804 | 3.378122  | C                                                                                                                   | -4.303040 | -0.466463 | -2.322366 |
| C | 7.743698  | -2.334917 | 2.134282  | F                                                                                                                   | -5.232182 | -0.076347 | 1.645877  |
| C | 6.810028  | -2.068734 | 1.133919  | F                                                                                                                   | -6.344540 | -2.280033 | 2.708806  |
| F | 7.008966  | -0.371198 | -1.404155 | F                                                                                                                   | -5.255799 | -4.730134 | 2.212140  |
| F | 7.935861  | 1.932174  | -2.376808 | F                                                                                                                   | -3.045302 | -4.931116 | 0.641342  |
| F | 6.584624  | 4.256820  | -1.935021 | F                                                                                                                   | -1.927060 | -2.762007 | -0.413200 |
| F | 4.274838  | 4.212678  | -0.490606 | F                                                                                                                   | -2.811735 | 0.108654  | 2.954807  |
| F | 3.325759  | 1.944149  | 0.482580  | F                                                                                                                   | -5.210485 | 2.243344  | -0.134067 |
|   |           |           |           | F                                                                                                                   | -7.081961 | 2.506153  | -1.986862 |



|                                                                    |           |           |           |   |           |           |           |
|--------------------------------------------------------------------|-----------|-----------|-----------|---|-----------|-----------|-----------|
| F                                                                  | -7.184667 | 0.809573  | -4.115900 | C | 0.006380  | -0.033902 | -0.493039 |
| F                                                                  | -5.350318 | -1.193516 | -4.329588 | C | -0.365693 | 0.084003  | 0.927702  |
| F                                                                  | -3.471839 | -1.504341 | -2.466155 | C | -1.662720 | 0.123831  | 1.253742  |
| F                                                                  | -2.623517 | 2.820791  | -0.925820 | C | -2.719750 | 0.011546  | 0.225358  |
| F                                                                  | -2.098642 | 4.945393  | 0.602767  | O | -3.885879 | 0.030229  | 0.630401  |
| F                                                                  | -1.945852 | 4.685442  | 3.311401  | O | 1.181392  | -0.037107 | -0.895635 |
| F                                                                  | -2.317111 | 2.237308  | 4.451231  | H | -3.126577 | -0.166524 | -1.937575 |
| O                                                                  | 3.394970  | -0.704912 | 0.988680  | H | -0.688101 | -0.210325 | -2.545032 |
| B                                                                  | 4.638925  | -0.846842 | 0.201100  | H | 0.419093  | 0.131923  | 1.674559  |
| C                                                                  | 5.158217  | 0.615903  | -0.435890 | H | -2.008030 | 0.210657  | 2.278500  |
| C                                                                  | 4.473830  | -2.010755 | -0.938532 | B | -5.331586 | -0.112520 | -0.209834 |
| C                                                                  | 5.783403  | -1.259439 | 1.302438  | C | -5.523424 | 1.342928  | -0.887944 |
| C                                                                  | 6.332228  | 0.691908  | -1.183447 | C | -5.104935 | -1.333215 | -1.240007 |
| C                                                                  | 6.878233  | 1.872197  | -1.670962 | C | -6.364422 | -0.395566 | 0.986569  |
| C                                                                  | 6.249199  | 3.074409  | -1.390693 | C | -6.806840 | 1.626362  | -1.387828 |
| C                                                                  | 5.091421  | 3.063895  | -0.632101 | C | -7.084165 | 2.809869  | -2.061296 |
| C                                                                  | 4.576911  | 1.854474  | -0.168479 | C | -6.084761 | 3.767133  | -2.235806 |
| C                                                                  | 4.091581  | -3.285559 | -0.490371 | C | -4.814812 | 3.524975  | -1.728483 |
| C                                                                  | 3.906869  | -4.355277 | -1.360475 | C | -4.546035 | 2.327190  | -1.063194 |
| C                                                                  | 4.100271  | -4.180993 | -2.729964 | C | -5.400579 | -1.235319 | -2.605982 |
| C                                                                  | 4.469578  | -2.927517 | -3.206689 | C | -5.163586 | -2.296338 | -3.480578 |
| C                                                                  | 4.649937  | -1.866437 | -2.319287 | C | -4.615330 | -3.484267 | -3.006460 |
| C                                                                  | 5.685118  | -0.772719 | 2.614605  | C | -4.321612 | -3.611508 | -1.649916 |
| C                                                                  | 6.640581  | -1.067454 | 3.584257  | C | -4.572279 | -2.550996 | -0.783813 |
| C                                                                  | 7.736108  | -1.868439 | 3.265763  | C | -7.193105 | -1.522416 | 1.016098  |
| C                                                                  | 7.855933  | -2.368691 | 1.971747  | C | -8.105726 | -1.727162 | 2.051770  |
| C                                                                  | 6.891763  | -2.065841 | 1.010701  | C | -8.199788 | -0.806481 | 3.089137  |
| F                                                                  | 7.024343  | -0.424249 | -1.477763 | C | -7.385846 | 0.326288  | 3.080962  |
| F                                                                  | 8.008823  | 1.868365  | -2.395705 | C | -6.490533 | 0.526485  | 2.037112  |
| F                                                                  | 6.758693  | 4.229735  | -1.843185 | H | -7.599812 | 0.896206  | -1.240616 |
| F                                                                  | 4.486110  | 4.224623  | -0.344646 | H | -8.083696 | 2.991949  | -2.444279 |
| F                                                                  | 3.470446  | 1.963458  | 0.574688  | H | -6.300195 | 4.697010  | -2.752135 |
| H                                                                  | -1.057121 | -0.779705 | 1.601291  | H | -4.032346 | 4.269556  | -1.839112 |
| H                                                                  | 1.286331  | -1.047275 | 2.357110  | H | -3.542337 | 2.198438  | -0.659178 |
| H                                                                  | 2.697053  | -0.001194 | -1.537655 | H | -5.813980 | -0.307699 | -2.994681 |
| H                                                                  | 0.349281  | 0.278927  | -2.296810 | H | -5.403378 | -2.192140 | -4.534529 |
| H                                                                  | 3.930129  | -3.427536 | 0.576580  | H | -4.423417 | -4.308366 | -3.686247 |
| H                                                                  | 3.604433  | -5.325650 | -0.973964 | H | -3.904923 | -4.538777 | -1.268364 |
| H                                                                  | 3.953801  | -5.010631 | -3.417050 | H | -4.359612 | -2.673446 | 0.277615  |
| H                                                                  | 4.611170  | -2.771779 | -4.273784 | H | -7.127673 | -2.253759 | 0.214511  |
| H                                                                  | 4.923047  | -0.892823 | -2.722385 | H | -8.740528 | -2.608190 | 2.047653  |
| H                                                                  | 4.822603  | -0.161177 | 2.868218  | H | -8.905904 | -0.964817 | 3.898496  |
| H                                                                  | 6.530459  | -0.675871 | 4.593379  | H | -7.459552 | 1.054036  | 3.883617  |
| H                                                                  | 8.484276  | -2.104025 | 4.019134  | H | -5.875792 | 1.425147  | 2.027942  |
| H                                                                  | 8.701443  | -3.002017 | 1.711196  | B | 2.536162  | 0.094006  | -0.036142 |
| H                                                                  | 6.993229  | -2.471816 | 0.006976  | C | 2.622586  | -1.127560 | 1.032607  |
|                                                                    |           |           |           | C | 2.441400  | 1.600563  | 0.565889  |
|                                                                    |           |           |           | C | 3.691126  | -0.156727 | -1.139894 |
|                                                                    |           |           |           | C | 3.708365  | -1.113149 | 1.906288  |
|                                                                    |           |           |           | C | 3.995347  | -2.138349 | 2.792262  |
|                                                                    |           |           |           | C | 3.174741  | -3.260703 | 2.814713  |
| 80                                                                 |           |           |           |   |           |           |           |
| B(C <sub>6</sub> F <sub>5</sub> ) <sub>3</sub> -Q-BPh <sub>3</sub> |           |           |           |   |           |           |           |
| C                                                                  | -2.336659 | -0.107380 | -1.198422 |   |           |           |           |
| C                                                                  | -1.036816 | -0.130378 | -1.521489 |   |           |           |           |

|                                                                                    |           |           |           |   |           |           |           |
|------------------------------------------------------------------------------------|-----------|-----------|-----------|---|-----------|-----------|-----------|
| C                                                                                  | 2.089013  | -3.328693 | 1.956679  | C | -5.378905 | -1.544226 | -2.436975 |
| C                                                                                  | 1.842235  | -2.274613 | 1.083134  | C | -5.273096 | -2.738927 | -3.150984 |
| C                                                                                  | 2.500936  | 2.687620  | -0.305675 | C | -4.914571 | -3.913705 | -2.498667 |
| C                                                                                  | 2.434530  | 4.009477  | 0.107791  | C | -4.668000 | -3.883440 | -1.126846 |
| C                                                                                  | 2.287940  | 4.289032  | 1.460566  | C | -4.785337 | -2.687343 | -0.426366 |
| C                                                                                  | 2.201736  | 3.243979  | 2.367390  | C | -7.526456 | -1.099946 | 0.810541  |
| C                                                                                  | 2.277433  | 1.934814  | 1.905755  | C | -8.548806 | -1.157103 | 1.757822  |
| C                                                                                  | 3.596516  | -1.275806 | -1.963181 | C | -8.475070 | -0.382617 | 2.911113  |
| C                                                                                  | 4.557289  | -1.621022 | -2.901903 | C | -7.374574 | 0.451667  | 3.102694  |
| C                                                                                  | 5.691110  | -0.829302 | -3.025116 | C | -6.367325 | 0.506729  | 2.144372  |
| C                                                                                  | 5.840188  | 0.284310  | -2.211512 | H | -7.402120 | 0.602045  | -1.706114 |
| C                                                                                  | 4.849951  | 0.597159  | -1.287087 | H | -7.862073 | 2.639579  | -3.013188 |
| F                                                                                  | 4.524336  | -0.051499 | 1.900466  | H | -6.217589 | 4.506403  | -3.037019 |
| F                                                                                  | 5.040830  | -2.064987 | 3.609948  | H | -4.118443 | 4.296201  | -1.725045 |
| F                                                                                  | 3.428209  | -4.256703 | 3.655127  | H | -3.656979 | 2.262733  | -0.439126 |
| F                                                                                  | 1.293301  | -4.395629 | 1.968474  | H | -5.645187 | -0.633879 | -2.969646 |
| F                                                                                  | 0.765505  | -2.417024 | 0.282288  | H | -5.465517 | -2.748785 | -4.220614 |
| F                                                                                  | 2.632601  | 2.471818  | -1.619716 | H | -4.825344 | -4.844404 | -3.051554 |
| F                                                                                  | 2.531767  | -2.088236 | -1.853657 | H | -4.385439 | -4.793922 | -0.605424 |
| F                                                                                  | 4.408596  | -2.698496 | -3.669877 | H | -4.601729 | -2.679070 | 0.646755  |
| F                                                                                  | 6.628672  | -1.138967 | -3.913763 | H | -7.589435 | -1.726437 | -0.077110 |
| F                                                                                  | 6.928264  | 1.042710  | -2.320611 | H | -9.400079 | -1.813899 | 1.598062  |
| F                                                                                  | 5.064936  | 1.678953  | -0.530692 | H | -9.265374 | -0.427990 | 3.655281  |
| F                                                                                  | 2.129476  | 0.977266  | 2.839184  | H | -7.305895 | 1.061451  | 3.999931  |
| F                                                                                  | 2.033977  | 3.496688  | 3.662833  | H | -5.516722 | 1.166780  | 2.301376  |
| F                                                                                  | 2.212742  | 5.545875  | 1.878733  | B | 2.473239  | 0.064582  | -0.093122 |
| F                                                                                  | 2.502716  | 5.004505  | -0.771711 | C | 2.728703  | -1.161884 | 0.963786  |
|                                                                                    |           |           |           | C | 2.342548  | 1.553981  | 0.585818  |
| 80                                                                                 |           |           |           | C | 3.705110  | -0.060913 | -1.168131 |
| [B(C <sub>6</sub> F <sub>5</sub> ) <sub>3</sub> -Q-BPh <sub>3</sub> ] <sup>-</sup> |           |           |           | C | 3.828144  | -1.076214 | 1.814132  |
| C                                                                                  | -2.352901 | -0.113906 | -1.130925 | C | 4.224542  | -2.091350 | 2.668783  |
| C                                                                                  | -1.034473 | -0.143039 | -1.475409 | C | 3.507559  | -3.281031 | 2.677814  |
| C                                                                                  | -0.000536 | -0.109301 | -0.488351 | C | 2.416974  | -3.424297 | 1.837034  |
| C                                                                                  | -0.365241 | -0.058506 | 0.893650  | C | 2.054369  | -2.376040 | 0.994139  |
| C                                                                                  | -1.683653 | -0.026825 | 1.241796  | C | 2.306839  | 2.667258  | -0.251643 |
| C                                                                                  | -2.725375 | -0.052673 | 0.254631  | C | 2.160201  | 3.970187  | 0.200107  |
| O                                                                                  | -3.936725 | -0.003586 | 0.685018  | C | 2.027480  | 4.203975  | 1.561599  |
| O                                                                                  | 1.221343  | -0.129002 | -0.924771 | C | 2.039984  | 3.131494  | 2.437185  |
| H                                                                                  | -3.132182 | -0.125564 | -1.882077 | C | 2.193499  | 1.843016  | 1.936053  |
| H                                                                                  | -0.719620 | -0.182455 | -2.512151 | C | 3.725067  | -1.160768 | -2.023916 |
| H                                                                                  | 0.406927  | -0.058262 | 1.654080  | C | 4.734046  | -1.398360 | -2.947643 |
| H                                                                                  | -1.995775 | 0.007950  | 2.279906  | C | 5.801318  | -0.516141 | -3.025730 |
| B                                                                                  | -5.252663 | -0.132490 | -0.153971 | C | 5.839422  | 0.578862  | -2.178132 |
| C                                                                                  | -5.474609 | 1.241072  | -0.994050 | C | 4.806185  | 0.781405  | -1.269201 |
| C                                                                                  | -5.138234 | -1.483365 | -1.058653 | F | 4.559228  | 0.049337  | 1.821964  |
| C                                                                                  | -6.412171 | -0.268155 | 0.976032  | F | 5.282955  | -1.947950 | 3.470577  |
| C                                                                                  | -6.664542 | 1.403042  | -1.724541 | F | 3.869693  | -4.276152 | 3.489083  |
| C                                                                                  | -6.932443 | 2.554398  | -2.456700 | F | 1.728106  | -4.567839 | 1.835214  |
| C                                                                                  | -6.013636 | 3.603278  | -2.469149 | F | 0.995829  | -2.602630 | 0.204777  |
| C                                                                                  | -4.838426 | 3.482382  | -1.736607 | F | 2.441054  | 2.506904  | -1.574688 |
| C                                                                                  | -4.580167 | 2.317949  | -1.011555 | F | 2.747091  | -2.074882 | -1.962978 |

|   |          |           |           |
|---|----------|-----------|-----------|
| F | 4.697526 | -2.468265 | -3.746896 |
| F | 6.785213 | -0.725037 | -3.902626 |
| F | 6.869512 | 1.427624  | -2.239528 |
| F | 4.933111 | 1.857273  | -0.480784 |
| F | 2.147187 | 0.859859  | 2.853209  |
| F | 1.895248 | 3.340461  | 3.748102  |
| F | 1.882162 | 5.447274  | 2.019847  |
| F | 2.148094 | 4.997137  | -0.652650 |

80

 $[B(C_6F_5)_3-Q-BPh_3]^{2-}$ 

|   |           |           |           |
|---|-----------|-----------|-----------|
| C | -2.336659 | -0.107380 | -1.198422 |
| C | -1.036816 | -0.130378 | -1.521489 |
| C | 0.006380  | -0.033902 | -0.493039 |
| C | -0.365693 | 0.084003  | 0.927702  |
| C | -1.662720 | 0.123831  | 1.253742  |
| C | -2.719750 | 0.011546  | 0.225358  |
| O | -3.885879 | 0.030229  | 0.630401  |
| O | 1.181392  | -0.037107 | -0.895635 |
| H | -3.126577 | -0.166524 | -1.937575 |
| H | -0.688101 | -0.210325 | -2.545032 |
| H | 0.419093  | 0.131923  | 1.674559  |
| H | -2.008030 | 0.210657  | 2.278500  |
| B | -5.331586 | -0.112520 | -0.209834 |
| C | -5.523424 | 1.342928  | -0.887944 |
| C | -5.104935 | -1.333215 | -1.240007 |
| C | -6.364422 | -0.395566 | 0.986569  |
| C | -6.806840 | 1.626362  | -1.387828 |
| C | -7.084165 | 2.809869  | -2.061296 |
| C | -6.084761 | 3.767133  | -2.235806 |
| C | -4.814812 | 3.524975  | -1.728483 |
| C | -4.546035 | 2.327190  | -1.063194 |
| C | -5.400579 | -1.235319 | -2.605982 |
| C | -5.163586 | -2.296338 | -3.480578 |
| C | -4.615330 | -3.484267 | -3.006460 |
| C | -4.321612 | -3.611508 | -1.649916 |
| C | -4.572279 | -2.550996 | -0.783813 |
| C | -7.193105 | -1.522416 | 1.016098  |
| C | -8.105726 | -1.727162 | 2.051770  |
| C | -8.199788 | -0.806481 | 3.089137  |
| C | -7.385846 | 0.326288  | 3.080962  |
| C | -6.490533 | 0.526485  | 2.037112  |
| H | -7.599812 | 0.896206  | -1.240616 |
| H | -8.083696 | 2.991949  | -2.444279 |
| H | -6.300195 | 4.697010  | -2.752135 |
| H | -4.032346 | 4.269556  | -1.839112 |
| H | -3.542337 | 2.198438  | -0.659178 |
| H | -5.813980 | -0.307699 | -2.994681 |
| H | -5.403378 | -2.192140 | -4.534529 |
| H | -4.423417 | -4.308366 | -3.686247 |
| H | -3.904923 | -4.538777 | -1.268364 |

|   |           |           |           |
|---|-----------|-----------|-----------|
| H | -4.359612 | -2.673446 | 0.277615  |
| H | -7.127673 | -2.253759 | 0.214511  |
| H | -8.740528 | -2.608190 | 2.047653  |
| H | -8.905904 | -0.964817 | 3.898496  |
| H | -7.459552 | 1.054036  | 3.883617  |
| H | -5.875792 | 1.425147  | 2.027942  |
| B | 2.536162  | 0.094006  | -0.036142 |
| C | 2.622586  | -1.127560 | 1.032607  |
| C | 2.441400  | 1.600563  | 0.565889  |
| C | 3.691126  | -0.156727 | -1.139894 |
| C | 3.708365  | -1.113149 | 1.906288  |
| C | 3.995347  | -2.138349 | 2.792262  |
| C | 3.174741  | -3.260703 | 2.814713  |
| C | 2.089013  | -3.328693 | 1.956679  |
| C | 1.842235  | -2.274613 | 1.083134  |
| C | 2.500936  | 2.687620  | -0.305675 |
| C | 2.434530  | 4.009477  | 0.107791  |
| C | 2.287940  | 4.289032  | 1.460566  |
| C | 2.201736  | 3.243979  | 2.367390  |
| C | 2.277433  | 1.934814  | 1.905755  |
| C | 3.596516  | -1.275806 | -1.963181 |
| C | 4.557289  | -1.621022 | -2.901903 |
| C | 5.691110  | -0.829302 | -3.025116 |
| C | 5.840188  | 0.284310  | -2.211512 |
| C | 4.849951  | 0.597159  | -1.287087 |
| F | 4.524336  | -0.051499 | 1.900466  |
| F | 5.040830  | -2.064987 | 3.609948  |
| F | 3.428209  | -4.256703 | 3.655127  |
| F | 1.293301  | -4.395629 | 1.968474  |
| F | 0.765505  | -2.417024 | 0.282288  |
| F | 2.632601  | 2.471818  | -1.619716 |
| F | 2.531767  | -2.088236 | -1.853657 |
| F | 4.408596  | -2.698496 | -3.669877 |
| F | 6.628672  | -1.138967 | -3.913763 |
| F | 6.928264  | 1.042710  | -2.320611 |
| F | 5.064936  | 1.678953  | -0.530692 |
| F | 2.129476  | 0.977266  | 2.839184  |
| F | 2.033977  | 3.496688  | 3.662833  |
| F | 2.212742  | 5.545875  | 1.878733  |
| F | 2.502716  | 5.004505  | -0.771711 |

68

 $B(C_6F_5)_3-Q-BEt_3$ 

|   |           |          |           |
|---|-----------|----------|-----------|
| C | -3.498820 | 0.567849 | -0.966514 |
| C | -2.222469 | 0.367361 | -1.311055 |
| C | -1.146594 | 0.504419 | -0.316751 |
| C | -1.461823 | 0.889296 | 1.066118  |
| C | -2.738276 | 1.108102 | 1.405128  |
| C | -3.849770 | 0.954779 | 0.425717  |
| O | -5.000967 | 1.145995 | 0.762429  |
| O | 0.000344  | 0.292602 | -0.744586 |

|   |           |           |           |                                                                                    |           |           |           |
|---|-----------|-----------|-----------|------------------------------------------------------------------------------------|-----------|-----------|-----------|
| B | -7.151507 | 0.227594  | -0.366913 | H                                                                                  | -9.998047 | 0.632069  | 1.686329  |
| C | -6.984084 | 0.925930  | -1.782307 | H                                                                                  | -9.201433 | -0.872491 | 1.220746  |
| C | -6.670638 | -1.270318 | -0.177127 | H                                                                                  | -9.950810 | 0.148453  | -0.008939 |
| C | -8.037611 | 0.918346  | 0.745231  | H                                                                                  | -7.430450 | -1.918119 | -2.125664 |
| C | -9.371450 | 0.166582  | 0.920680  | H                                                                                  | -8.587637 | -2.129559 | -0.811196 |
| C | -7.525694 | -2.192734 | -1.069937 | H                                                                                  | -7.226584 | -3.239732 | -0.972099 |
| C | -8.361574 | 1.160114  | -2.431740 | H                                                                                  | -8.993570 | 1.784845  | -1.793455 |
| B | 1.476192  | 0.089436  | -0.194616 | H                                                                                  | -8.890613 | 0.214716  | -2.592322 |
| C | 2.173899  | 1.490495  | -0.617181 | H                                                                                  | -8.274228 | 1.655934  | -3.402253 |
| C | 1.992764  | -1.241193 | -0.964237 |                                                                                    |           |           |           |
| C | 1.476533  | -0.266034 | 1.391212  |                                                                                    |           |           |           |
| C | 3.104768  | 1.670431  | -1.635487 | 68                                                                                 |           |           |           |
| C | 3.649351  | 2.912660  | -1.949707 | [B(C <sub>6</sub> F <sub>5</sub> ) <sub>3</sub> -Q-BEt <sub>3</sub> ] <sup>-</sup> |           |           |           |
| C | 3.251530  | 4.037772  | -1.245115 | C                                                                                  | -2.930026 | -0.033764 | -2.838511 |
| C | 3.332035  | -1.583033 | -0.795540 | C                                                                                  | -1.573111 | 0.006352  | -2.744130 |
| C | 3.903699  | -2.732403 | -1.313567 | C                                                                                  | -0.927020 | -0.075863 | -1.472675 |
| C | 3.103529  | -3.614849 | -2.030271 | C                                                                                  | -1.729407 | -0.218805 | -0.300768 |
| C | 2.373767  | 0.243524  | 2.324137  | C                                                                                  | -3.093730 | -0.260890 | -0.391778 |
| C | 2.418029  | -0.195909 | 3.644422  | C                                                                                  | -3.752354 | -0.164396 | -1.665448 |
| C | 1.545279  | -1.186607 | 4.068980  | O                                                                                  | -5.019351 | -0.185901 | -1.835753 |
| C | 1.760135  | -3.327646 | -2.208328 | O                                                                                  | 0.373142  | -0.020983 | -1.477948 |
| C | 1.226645  | -2.159533 | -1.670434 | B                                                                                  | -6.179409 | -0.325417 | -0.742772 |
| C | 0.635587  | -1.731252 | 3.170289  | C                                                                                  | -6.049202 | -1.838127 | -0.117929 |
| C | 0.635375  | -1.271033 | 1.863475  | C                                                                                  | -6.028008 | 0.885102  | 0.351733  |
| C | 2.312131  | 3.910502  | -0.229819 | C                                                                                  | -7.504820 | -0.144370 | -1.673876 |
| C | 1.801242  | 2.654604  | 0.048875  | C                                                                                  | -8.821862 | -0.511875 | -0.984539 |
| F | 0.887169  | 2.581515  | 1.037948  | C                                                                                  | -5.627940 | 2.242310  | -0.235910 |
| F | 1.911707  | 4.982270  | 0.450988  | C                                                                                  | -6.654388 | -1.998043 | 1.282207  |
| F | 3.757574  | 5.228760  | -1.541306 | B                                                                                  | 1.267972  | 0.068455  | -0.264423 |
| F | 4.539380  | 3.028455  | -2.931623 | C                                                                                  | 0.846004  | 1.450654  | 0.515861  |
| F | 3.526605  | 0.647520  | -2.383511 | C                                                                                  | 2.790851  | 0.102062  | -0.877192 |
| F | -0.267280 | -1.812943 | 1.021412  | C                                                                                  | 1.234136  | -1.289924 | 0.653828  |
| F | -0.212157 | -2.677110 | 3.567564  | C                                                                                  | 1.025509  | 2.665564  | -0.142375 |
| F | 1.572353  | -1.608772 | 5.327338  | C                                                                                  | 0.667658  | 3.894311  | 0.390958  |
| F | 3.291120  | 0.325459  | 4.501070  | C                                                                                  | 0.083394  | 3.942171  | 1.648813  |
| F | 3.250142  | 1.192250  | 1.987519  | C                                                                                  | 3.817922  | 0.960618  | -0.502750 |
| F | 4.123215  | -0.752364 | -0.100157 | C                                                                                  | 5.100293  | 0.894303  | -1.037911 |
| F | 5.193766  | -3.002595 | -1.130925 | C                                                                                  | 5.399796  | -0.074562 | -1.981492 |
| F | 3.623943  | -4.727791 | -2.536900 | C                                                                                  | 1.987755  | -1.312783 | 1.824630  |
| F | 0.983678  | -4.173359 | -2.884198 | C                                                                                  | 2.141335  | -2.434148 | 2.622919  |
| F | -0.090633 | -1.976896 | -1.870762 | C                                                                                  | 1.532134  | -3.621731 | 2.238495  |
| H | -4.324945 | 0.461222  | -1.662638 | C                                                                                  | 4.414419  | -0.969245 | -2.371256 |
| H | -1.906114 | 0.067680  | -2.304104 | C                                                                                  | 3.148457  | -0.870003 | -1.809665 |
| H | -0.642515 | 1.019793  | 1.759179  | C                                                                                  | 0.787964  | -3.657491 | 1.071734  |
| H | -3.028824 | 1.410905  | 2.405827  | C                                                                                  | 0.660009  | -2.504669 | 0.300179  |
| H | -6.362434 | 0.341819  | -2.476237 | C                                                                                  | -0.132118 | 2.762408  | 2.340640  |
| H | -6.494538 | 1.900734  | -1.646859 | C                                                                                  | 0.247469  | 1.554204  | 1.764669  |
| H | -6.732338 | -1.604753 | 0.865348  | F                                                                                  | -0.039403 | 0.456452  | 2.486704  |
| H | -5.621158 | -1.381585 | -0.485807 | F                                                                                  | -0.707246 | 2.793096  | 3.545102  |
| H | -7.495099 | 0.888978  | 1.698477  | F                                                                                  | -0.270775 | 5.111863  | 2.181791  |
| H | -8.237326 | 1.974240  | 0.525574  | F                                                                                  | 0.880042  | 5.026399  | -0.285015 |
|   |           |           |           | F                                                                                  | 1.596706  | 2.686156  | -1.354649 |



$[\text{H-Q-SiPhH}_2]^{2+}$ 

|    |           |           |           |
|----|-----------|-----------|-----------|
| C  | -2.092070 | -0.826480 | 0.812330  |
| C  | -3.334020 | -0.401300 | 1.099120  |
| C  | -3.997570 | 0.544440  | 0.202640  |
| C  | -3.356650 | 1.058930  | -0.995990 |
| C  | -2.112240 | 0.639480  | -1.286070 |
| C  | -1.432620 | -0.347660 | -0.414720 |
| O  | -0.320310 | -0.755510 | -0.793230 |
| O  | -5.172180 | 0.882110  | 0.557410  |
| Si | 1.144590  | -1.764020 | -0.175460 |
| C  | 2.390520  | -0.455760 | 0.030110  |
| C  | 3.146820  | -0.015690 | -1.078950 |
| C  | 4.137350  | 0.937620  | -0.904040 |
| C  | 4.373310  | 1.467800  | 0.368540  |
| C  | 3.626220  | 1.044720  | 1.473550  |
| C  | 2.631660  | 0.093600  | 1.307550  |
| H  | -1.569720 | -1.531740 | 1.450990  |
| H  | -3.886940 | -0.727450 | 1.975720  |
| H  | -3.885830 | 1.767690  | -1.628230 |
| H  | -1.567500 | 0.979110  | -2.162770 |
| H  | -5.645000 | 1.514750  | -0.022160 |
| H  | 0.599780  | -2.344730 | 1.060620  |
| H  | 1.219330  | -2.656600 | -1.333800 |
| H  | 2.978780  | -0.436560 | -2.066880 |
| H  | 4.734350  | 1.263630  | -1.748340 |
| H  | 5.150000  | 2.213930  | 0.502090  |
| H  | 3.833880  | 1.450300  | 2.457430  |
| H  | 2.070240  | -0.247020 | 2.173960  |

27

 $[\text{H-Q-SiPhH}_2]^{+}$ 

|    |           |           |           |
|----|-----------|-----------|-----------|
| C  | -2.333990 | -1.087880 | 0.000000  |
| C  | -3.695710 | -1.034800 | 0.000000  |
| C  | -4.358320 | 0.229050  | -0.000010 |
| C  | -3.617100 | 1.443980  | 0.000000  |
| C  | -2.255350 | 1.392810  | 0.000000  |
| C  | -1.576420 | 0.128130  | 0.000010  |
| O  | -0.281030 | 0.160670  | 0.000010  |
| O  | -5.671640 | 0.191660  | -0.000010 |
| Si | 0.888330  | -1.158510 | 0.000020  |
| C  | 2.551270  | -0.394020 | 0.000000  |
| C  | 3.197990  | -0.099420 | -1.210810 |
| C  | 4.457300  | 0.489070  | -1.209530 |
| C  | 5.083620  | 0.783280  | -0.000020 |
| C  | 4.457300  | 0.489090  | 1.209510  |
| C  | 3.198000  | -0.099390 | 1.210810  |
| H  | -1.821240 | -2.043910 | 0.000010  |
| H  | -4.308180 | -1.929610 | -0.000010 |
| H  | -4.139120 | 2.396210  | -0.000010 |
| H  | -1.645280 | 2.289170  | 0.000010  |
| H  | -6.077360 | 1.072520  | -0.000020 |

|   |          |           |           |
|---|----------|-----------|-----------|
| H | 0.552900 | -1.907530 | 1.226590  |
| H | 0.552890 | -1.907540 | -1.226550 |
| H | 2.721870 | -0.335460 | -2.159200 |
| H | 4.953040 | 0.712260  | -2.147910 |
| H | 6.068690 | 1.238150  | -0.000020 |
| H | 4.953050 | 0.712310  | 2.147890  |
| H | 2.721880 | -0.335410 | 2.159210  |

27

 $\text{H-Q-SiPhH}_2$ 

|    |           |           |           |
|----|-----------|-----------|-----------|
| C  | -2.291950 | -1.092920 | 0.073220  |
| C  | -3.676700 | -1.066620 | -0.039970 |
| C  | -4.355520 | 0.149720  | -0.043080 |
| C  | -3.637520 | 1.339810  | 0.069430  |
| C  | -2.252240 | 1.313060  | 0.178570  |
| C  | -1.572070 | 0.098300  | 0.177680  |
| O  | -0.209100 | 0.130980  | 0.298640  |
| O  | -5.714350 | 0.112970  | -0.155990 |
| Si | 0.842200  | -1.088590 | -0.144000 |
| C  | 2.536140  | -0.325300 | -0.063340 |
| C  | 2.705100  | 1.060060  | -0.182390 |
| C  | 3.976220  | 1.626570  | -0.149100 |
| C  | 5.096970  | 0.813830  | 0.001690  |
| C  | 4.945840  | -0.565130 | 0.125630  |
| C  | 3.673180  | -1.127390 | 0.096890  |
| H  | -1.775410 | -2.048690 | 0.092420  |
| H  | -4.248940 | -1.983760 | -0.122610 |
| H  | -4.161190 | 2.292620  | 0.070540  |
| H  | -1.680290 | 2.230180  | 0.265810  |
| H  | -6.058920 | 1.012360  | -0.141810 |
| H  | 0.766010  | -2.247960 | 0.779490  |
| H  | 0.472710  | -1.560110 | -1.501510 |
| H  | 1.831170  | 1.696670  | -0.289250 |
| H  | 4.093270  | 2.701970  | -0.238410 |
| H  | 6.088330  | 1.255260  | 0.027790  |
| H  | 5.817640  | -1.199280 | 0.251260  |
| H  | 3.567660  | -2.204510 | 0.209650  |

35

 $[\text{H-Q-SiEt}_3]^{2+}$ 

|    |           |           |           |
|----|-----------|-----------|-----------|
| C  | 1.578710  | -0.886520 | -0.375100 |
| C  | 2.900300  | -1.061220 | -0.531890 |
| C  | 3.808690  | 0.056510  | -0.275480 |
| C  | 3.336690  | 1.369660  | 0.140440  |
| C  | 2.015310  | 1.554440  | 0.292440  |
| C  | 1.064590  | 0.436030  | 0.046020  |
| O  | -0.136810 | 0.675060  | 0.198600  |
| O  | 5.040010  | -0.208040 | -0.445600 |
| Si | -1.846700 | -0.213630 | 0.076490  |
| C  | -2.113630 | -0.129850 | -1.763880 |
| C  | -1.503300 | -1.898470 | 0.801850  |



|                                                 |          |          |          |                                                 |          |          |          |
|-------------------------------------------------|----------|----------|----------|-------------------------------------------------|----------|----------|----------|
| $[\text{H-Q-Si}(\text{C}_6\text{Me}_5)_3]^{2+}$ |          |          |          | H                                               | -1.82234 | 0.58804  | 1.33345  |
| C                                               | 1.00292  | -1.17675 | 3.38414  | H                                               | -3.49588 | 0.82588  | 0.90306  |
| C                                               | 0.77088  | -2.06422 | 4.38359  | H                                               | -3.03937 | -0.57677 | 1.85522  |
| C                                               | -0.24092 | -3.06443 | 4.21232  | H                                               | -2.85370 | -4.03952 | -3.74686 |
| C                                               | -0.98936 | -3.15974 | 2.99985  | H                                               | -2.58966 | -2.62071 | -4.75755 |
| C                                               | -0.76094 | -2.27445 | 1.99009  | H                                               | -1.22137 | -3.46056 | -4.02390 |
| C                                               | 0.22821  | -1.22596 | 2.16031  | H                                               | -0.39285 | -1.45904 | -4.18181 |
| O                                               | 0.46755  | -0.32096 | 1.29344  | H                                               | 0.41987  | -0.39631 | -3.06011 |
| O                                               | -0.41566 | -3.87234 | 5.21896  | H                                               | 0.67021  | -2.13869 | -2.95406 |
| Si                                              | 0.11181  | 0.23383  | -0.39013 | H                                               | 2.14070  | 1.43306  | 1.10038  |
| C                                               | 1.85702  | -0.16522 | -0.97302 | H                                               | 2.35038  | 3.03571  | 1.80377  |
| C                                               | -1.35487 | -0.74939 | -1.00221 | H                                               | 1.49062  | 1.80002  | 2.70638  |
| C                                               | -0.26057 | 2.03198  | -0.01269 | H                                               | 0.99650  | 3.89475  | 3.39663  |
| C                                               | 0.36464  | 2.69564  | 1.08066  | H                                               | 1.16140  | 5.37846  | 2.45877  |
| C                                               | -0.16101 | 3.91733  | 1.55899  | H                                               | -0.30918 | 5.06567  | 3.37758  |
| C                                               | -1.25682 | 4.50359  | 0.91842  | H                                               | -0.99793 | 6.43909  | 1.84464  |
| C                                               | -1.85719 | 3.86337  | -0.19120 | H                                               | -2.17834 | 6.42095  | 0.54515  |
| C                                               | -1.33199 | 2.64953  | -0.68187 | H                                               | -2.58705 | 5.72113  | 2.11077  |
| C                                               | -2.56284 | -0.74008 | -0.25877 | H                                               | -3.69325 | 4.98404  | -0.12326 |
| C                                               | -3.66889 | -1.47257 | -0.72020 | H                                               | -2.74186 | 5.26698  | -1.57671 |
| C                                               | -3.56842 | -2.22268 | -1.90710 | H                                               | -3.65381 | 3.76753  | -1.39507 |
| C                                               | -2.36344 | -2.26065 | -2.62805 | H                                               | -2.85038 | 1.60907  | -1.86251 |
| C                                               | -1.28033 | -1.46831 | -2.21840 | H                                               | -2.03062 | 2.93708  | -2.69147 |
| C                                               | 2.66683  | 0.82180  | -1.54782 | H                                               | -1.21229 | 1.40498  | -2.46847 |
| C                                               | 4.05912  | 0.61287  | -1.63417 | H                                               | 1.95021  | -3.50241 | -0.61537 |
| C                                               | 4.63973  | -0.61768 | -1.20361 | H                                               | 1.60762  | -2.73825 | 0.92336  |
| C                                               | 3.84128  | -1.61026 | -0.63610 | H                                               | 0.54179  | -2.44546 | -0.47412 |
| C                                               | 2.44283  | -1.41543 | -0.57104 | H                                               | 5.42776  | -2.70437 | 0.32662  |
| C                                               | -4.76932 | -2.97463 | -2.42698 | H                                               | 3.83626  | -3.38377 | 0.61220  |
| C                                               | -2.72224 | 0.05954  | 1.02170  | H                                               | 4.61958  | -3.60791 | -0.95313 |
| C                                               | -2.24888 | -3.13849 | -3.85317 | H                                               | 6.46429  | -0.37880 | -2.32679 |
| C                                               | -0.08242 | -1.36213 | -3.14088 | H                                               | 6.69449  | -0.40985 | -0.57972 |
| C                                               | 1.65103  | 2.20215  | 1.69760  | H                                               | 6.35745  | -1.90337 | -1.45807 |
| C                                               | 0.45645  | 4.59441  | 2.75998  | H                                               | 4.51789  | 2.68084  | -2.04955 |
| C                                               | -1.77991 | 5.84120  | 1.37793  | H                                               | 5.93039  | 1.67665  | -1.71740 |
| C                                               | -3.04927 | 4.49698  | -0.85736 | H                                               | 5.10309  | 1.54621  | -3.26611 |
| C                                               | -1.88623 | 2.11541  | -1.98593 | H                                               | 1.01870  | 1.99719  | -2.33479 |
| C                                               | 1.58350  | -2.57213 | -0.17377 | H                                               | 2.22415  | 2.95414  | -1.47864 |
| C                                               | 4.45878  | -2.89439 | -0.13672 | H                                               | 2.56814  | 2.31627  | -3.09011 |
| C                                               | 6.11430  | -0.84338 | -1.40405 | H                                               | -4.90423 | -1.04172 | 1.02635  |
| C                                               | 4.94648  | 1.68883  | -2.18771 | H                                               | -5.73292 | -0.87232 | -0.51245 |
| C                                               | 2.08708  | 2.08873  | -2.13642 | H                                               | -5.38709 | -2.47361 | 0.12513  |
| C                                               | -4.98402 | -1.46287 | 0.02648  |                                                 |          |          |          |
| H                                               | 1.76654  | -0.41046 | 3.46175  |                                                 |          |          |          |
| H                                               | 1.32681  | -2.05591 | 5.31474  | 92                                              |          |          |          |
| H                                               | -1.73821 | -3.93908 | 2.89303  | $[\text{H-Q-Si}(\text{C}_6\text{Me}_5)_3]^{++}$ |          |          |          |
| H                                               | -1.32428 | -2.31886 | 1.06307  | C                                               | -0.68648 | -1.09957 | 3.54506  |
| H                                               | -1.10245 | -4.54476 | 5.07654  | C                                               | -1.58922 | -1.59118 | 4.43785  |
| H                                               | -5.70437 | -2.51683 | -2.10728 | C                                               | -2.91078 | -1.88601 | 4.00338  |
| H                                               | -4.77698 | -3.00478 | -3.51684 | C                                               | -3.29399 | -1.67965 | 2.65252  |
| H                                               | -4.77212 | -4.01202 | -2.07093 | C                                               | -2.39354 | -1.18970 | 1.74920  |



|    |          |          |          |                                                      |          |          |          |
|----|----------|----------|----------|------------------------------------------------------|----------|----------|----------|
| C  | -1.05467 | -0.87490 | 2.17324  | H                                                    | -0.84229 | -1.12863 | -4.15891 |
| O  | -0.13864 | -0.40956 | 1.40183  | H                                                    | 0.35567  | -0.76209 | -2.93486 |
| O  | -3.73876 | -2.35743 | 4.91771  | H                                                    | -0.57346 | -2.24826 | -2.82109 |
| Si | 0.27490  | 0.06704  | -0.27462 | H                                                    | 2.31424  | -0.31405 | 1.48212  |
| C  | 1.41499  | -1.36801 | -0.71242 | H                                                    | 3.55043  | 0.72395  | 2.16862  |
| C  | -1.40343 | 0.24980  | -1.11437 | H                                                    | 2.00145  | 0.56580  | 2.98499  |
| C  | 1.14751  | 1.69655  | 0.07712  | H                                                    | 3.09627  | 2.45420  | 3.56620  |
| C  | 1.97582  | 1.82925  | 1.21289  | H                                                    | 4.34597  | 3.25890  | 2.62014  |
| C  | 2.43258  | 3.09951  | 1.60367  | H                                                    | 3.04925  | 4.19603  | 3.35994  |
| C  | 2.11175  | 4.22856  | 0.83655  | H                                                    | 3.63588  | 5.48900  | 1.71192  |
| C  | 1.30930  | 4.09923  | -0.30841 | H                                                    | 2.81528  | 6.21242  | 0.33953  |
| C  | 0.86381  | 2.83287  | -0.71351 | H                                                    | 1.99837  | 6.11632  | 1.89964  |
| C  | -2.39573 | 1.06370  | -0.51542 | H                                                    | 0.80258  | 6.19395  | -0.45029 |
| C  | -3.67849 | 1.13941  | -1.08386 | H                                                    | 1.69196  | 5.58756  | -1.84671 |
| C  | -3.97555 | 0.41195  | -2.24850 | H                                                    | -0.01283 | 5.18879  | -1.63484 |
| C  | -3.00466 | -0.41436 | -2.83321 | H                                                    | -0.90232 | 3.01339  | -1.99491 |
| C  | -1.70307 | -0.44688 | -2.30617 | H                                                    | 0.63662  | 3.38703  | -2.77828 |
| C  | 2.70979  | -1.11005 | -1.21381 | H                                                    | 0.18845  | 1.72206  | -2.46781 |
| C  | 3.66763  | -2.13583 | -1.24135 | H                                                    | -0.65680 | -3.96698 | -0.51100 |
| C  | 3.31717  | -3.43918 | -0.85419 | H                                                    | -0.49360 | -3.24063 | 1.08104  |
| C  | 2.02049  | -3.71348 | -0.39485 | H                                                    | -1.06457 | -2.27836 | -0.30187 |
| C  | 1.06559  | -2.68710 | -0.34947 | H                                                    | 2.49810  | -5.58946 | 0.56225  |
| C  | -5.33540 | 0.54906  | -2.89375 | H                                                    | 0.81852  | -5.11768 | 0.74245  |
| C  | -2.12792 | 1.89658  | 0.72527  | H                                                    | 1.39136  | -5.75360 | -0.79937 |
| C  | -3.35996 | -1.26126 | -4.03508 | H                                                    | 5.01263  | -4.38410 | -1.80502 |
| C  | -0.63679 | -1.18645 | -3.08898 | H                                                    | 4.93105  | -4.65284 | -0.06417 |
| C  | 2.47432  | 0.63184  | 1.99799  | H                                                    | 3.84265  | -5.51722 | -1.15047 |
| C  | 3.27373  | 3.25726  | 2.85106  | H                                                    | 5.35495  | -0.80219 | -1.48940 |
| C  | 2.66904  | 5.58121  | 1.21639  | H                                                    | 5.80010  | -2.46677 | -1.15786 |
| C  | 0.92853  | 5.32880  | -1.10288 | H                                                    | 5.21766  | -2.01769 | -2.76063 |
| C  | 0.15526  | 2.72968  | -2.05032 | H                                                    | 2.21646  | 0.79913  | -2.13259 |
| C  | -0.35842 | -3.05191 | 0.00774  | H                                                    | 3.63880  | 0.86618  | -1.10189 |
| C  | 1.66030  | -5.11364 | 0.04970  | H                                                    | 3.71761  | 0.08681  | -2.68718 |
| C  | 4.32718  | -4.55663 | -0.97464 | H                                                    | -4.55453 | 2.22695  | 0.58537  |
| C  | 5.08188  | -1.83904 | -1.68699 | H                                                    | -4.84553 | 2.96207  | -0.98542 |
| C  | 3.08874  | 0.23170  | -1.80617 | H                                                    | -5.72922 | 1.51544  | -0.51148 |
| C  | -4.75354 | 2.00328  | -0.46156 |                                                      |          |          |          |
| H  | 0.33320  | -0.86711 | 3.82987  | 92                                                   |          |          |          |
| H  | -1.33825 | -1.77087 | 5.47700  | H-Q-Si(C <sub>6</sub> Me <sub>5</sub> ) <sub>3</sub> |          |          |          |
| H  | -4.30727 | -1.91708 | 2.34124  | C                                                    | 2.03547  | 1.60431  | 1.77488  |
| H  | -2.67486 | -1.02448 | 0.71567  | C                                                    | 2.76491  | 2.67769  | 2.26822  |
| H  | -4.61996 | -2.53896 | 4.55955  | C                                                    | 2.21691  | 3.50553  | 3.24680  |
| H  | -5.75991 | 1.53830  | -2.72103 | C                                                    | 0.93438  | 3.24983  | 3.72723  |
| H  | -5.27998 | 0.40530  | -3.97296 | C                                                    | 0.20353  | 2.17558  | 3.22910  |
| H  | -6.04678 | -0.18720 | -2.49996 | C                                                    | 0.74669  | 1.34809  | 2.24960  |
| H  | -1.09498 | 1.86590  | 1.06524  | O                                                    | -0.00190 | 0.28999  | 1.82035  |
| H  | -2.35573 | 2.94925  | 0.52992  | O                                                    | 2.98184  | 4.54389  | 3.69517  |
| H  | -2.76570 | 1.58735  | 1.56218  | Si                                                   | -0.12195 | -0.32387 | 0.24604  |
| H  | -4.40512 | -1.57156 | -4.00206 | C                                                    | -1.96332 | -0.84359 | 0.17890  |
| H  | -3.20731 | -0.72057 | -4.97691 | C                                                    | 0.25970  | 1.18603  | -0.85733 |
| H  | -2.75654 | -2.16865 | -4.07604 | C                                                    | 1.05389  | -1.81806 | 0.01676  |

|   |          |          |          |                                                                    |           |           |           |
|---|----------|----------|----------|--------------------------------------------------------------------|-----------|-----------|-----------|
| C | 1.03647  | -2.46050 | -1.24513 | H                                                                  | 3.04955   | -4.32032  | -3.25794  |
| C | 2.00977  | -3.40692 | -1.59319 | H                                                                  | 1.36276   | -4.82189  | -3.12288  |
| C | 2.97365  | -3.79507 | -0.65115 | H                                                                  | 3.52395   | -5.61524  | -1.68267  |
| C | 3.00382  | -3.17778 | 0.60494  | H                                                                  | 4.88065   | -4.51884  | -1.41392  |
| C | 2.03701  | -2.21413 | 0.95592  | H                                                                  | 4.22065   | -5.46673  | -0.08076  |
| C | 1.30947  | 1.25938  | -1.80098 | H                                                                  | 4.99975   | -3.86888  | 1.07713   |
| C | 1.36203  | 2.31884  | -2.72601 | H                                                                  | 4.36850   | -2.69254  | 2.21522   |
| C | 0.44610  | 3.37442  | -2.64423 | H                                                                  | 3.78483   | -4.35299  | 2.26221   |
| C | -0.56306 | 3.34637  | -1.67116 | H                                                                  | 2.27479   | -2.52851  | 3.06819   |
| C | -0.64872 | 2.27180  | -0.77184 | H                                                                  | 2.92618   | -0.98877  | 2.52121   |
| C | -2.88307 | -0.46757 | -0.82874 | H                                                                  | 1.18822   | -1.19839  | 2.68816   |
| C | -4.25678 | -0.72452 | -0.66711 | H                                                                  | -1.89137  | -3.04720  | 2.74113   |
| C | -4.72637 | -1.38797 | 0.47419  | H                                                                  | -0.52413  | -2.28470  | 1.96430   |
| C | -3.82719 | -1.76026 | 1.48144  | H                                                                  | -1.40236  | -1.41302  | 3.22029   |
| C | -2.45182 | -1.53235 | 1.31390  | H                                                                  | -5.34286  | -2.04293  | 2.99822   |
| C | 0.57874  | 4.57006  | -3.56232 | H                                                                  | -4.38382  | -3.49093  | 2.68412   |
| C | 2.47949  | 0.29350  | -1.81708 | H                                                                  | -3.70080  | -2.15196  | 3.60538   |
| C | -1.57126 | 4.47239  | -1.59916 | H                                                                  | -6.62796  | -1.96142  | -0.38033  |
| C | -1.73384 | 2.36310  | 0.28610  | H                                                                  | -6.34156  | -2.62203  | 1.21905   |
| C | -0.02687 | -2.12514 | -2.26708 | H                                                                  | -6.77655  | -0.92180  | 1.03652   |
| C | 2.04901  | -3.97549 | -2.99626 | H                                                                  | -4.90782  | 0.63259   | -2.22704  |
| C | 3.95163  | -4.90373 | -0.97540 | H                                                                  | -5.36918  | -1.04221  | -2.50913  |
| C | 4.09420  | -3.54263 | 1.58987  | H                                                                  | -6.22169  | -0.07510  | -1.30454  |
| C | 2.10049  | -1.69625 | 2.38036  | H                                                                  | -1.39913  | 0.18422   | -2.30074  |
| C | -1.51750 | -2.09125 | 2.36811  | H                                                                  | -2.91909  | -0.39220  | -2.97767  |
| C | -4.33963 | -2.39681 | 2.75589  | H                                                                  | -2.81959  | 1.20028   | -2.22913  |
| C | -6.19323 | -1.73978 | 0.59569  | H                                                                  | 2.72057   | 1.30814   | -4.07661  |
| C | -5.23856 | -0.28011 | -1.73009 | H                                                                  | 2.04531   | 2.79328   | -4.72139  |
| C | -2.47232 | 0.16349  | -2.14600 | H                                                                  | 3.32308   | 2.86321   | -3.50641  |
| C | 2.41836  | 2.32165  | -3.81082 |                                                                    |           |           |           |
| H | 2.46685  | 0.95850  | 1.01547  | 47                                                                 |           |           |           |
| H | 3.76472  | 2.88910  | 1.90594  | [H-Q-B(C <sub>6</sub> F <sub>5</sub> ) <sub>3</sub> ] <sup>+</sup> |           |           |           |
| H | 0.50235  | 3.89018  | 4.49257  | C                                                                  | -2.812900 | 0.498610  | -0.773710 |
| H | -0.79705 | 1.96484  | 3.59195  | C                                                                  | -4.124580 | 0.464670  | -1.083930 |
| H | 2.49065  | 5.03057  | 4.36567  | C                                                                  | -4.534580 | 0.128260  | -2.424780 |
| H | 1.60491  | 4.69893  | -3.90689 | C                                                                  | -3.589280 | -0.136480 | -3.482640 |
| H | -0.05927 | 4.47788  | -4.44999 | C                                                                  | -2.273690 | -0.084690 | -3.198200 |
| H | 0.29585  | 5.49158  | -3.05104 | C                                                                  | -1.822490 | 0.181000  | -1.820210 |
| H | 2.59356  | -0.24351 | -0.87901 | O                                                                  | -0.604000 | 0.100960  | -1.620520 |
| H | 2.40524  | -0.46362 | -2.60764 | B                                                                  | 0.214400  | 0.093090  | -0.204390 |
| H | 3.40617  | 0.84710  | -1.99046 | C                                                                  | -0.535850 | -0.946860 | 0.795790  |
| H | -1.70226 | 4.95642  | -2.56749 | C                                                                  | 0.198260  | 1.666500  | 0.161570  |
| H | -2.55191 | 4.11207  | -1.28480 | C                                                                  | 1.630110  | -0.556750 | -0.584350 |
| H | -1.26664 | 5.24428  | -0.88118 | C                                                                  | -0.082880 | -0.937590 | 2.118030  |
| H | -2.73551 | 2.27442  | -0.15111 | C                                                                  | -0.504990 | -1.837940 | 3.082540  |
| H | -1.65820 | 1.60535  | 1.06022  | C                                                                  | -1.409660 | -2.833650 | 2.725990  |
| H | -1.67865 | 3.33818  | 0.78081  | C                                                                  | -1.874140 | -2.899200 | 1.418860  |
| H | -0.98213 | -1.92411 | -1.78446 | C                                                                  | -1.421880 | -1.975210 | 0.486060  |
| H | 0.24205  | -1.24755 | -2.87058 | C                                                                  | -0.583260 | 2.254350  | 1.149420  |
| H | -0.19904 | -2.95419 | -2.95404 | C                                                                  | -0.566390 | 3.615220  | 1.431480  |
| H | 1.77212  | -3.21932 | -3.73375 | C                                                                  | 0.264610  | 4.453800  | 0.693910  |

|   |           |           |           |   |           |           |           |
|---|-----------|-----------|-----------|---|-----------|-----------|-----------|
| C | 1.051600  | 3.919520  | -0.316490 | C | -0.966950 | 2.462290  | -0.226190 |
| C | 0.990890  | 2.553610  | -0.571260 | C | 2.370610  | -0.164470 | -1.514970 |
| C | 1.677480  | -1.721970 | -1.350190 | C | 3.668050  | 0.155310  | -1.888080 |
| C | 2.852440  | -2.386420 | -1.654410 | C | 4.258170  | 1.296650  | -1.363280 |
| C | 4.056160  | -1.885880 | -1.160330 | C | 3.542680  | 2.088860  | -0.478490 |
| C | 4.059380  | -0.738310 | -0.375770 | C | 2.242930  | 1.733580  | -0.134610 |
| C | 2.858240  | -0.099840 | -0.099490 | F | 1.024060  | 0.117510  | 2.402740  |
| F | 0.805410  | -0.008960 | 2.480910  | F | 1.689060  | -1.977700 | 3.953830  |
| F | -0.053080 | -1.766780 | 4.324290  | F | 1.393610  | -4.514550 | 3.011560  |
| F | -1.834690 | -3.701860 | 3.625650  | F | 0.421680  | -4.915970 | 0.498980  |
| F | -2.749650 | -3.833050 | 1.066470  | F | -0.243090 | -2.860420 | -1.042040 |
| F | -1.933000 | -2.114090 | -0.762350 | F | -1.708920 | -0.097390 | 2.190550  |
| F | -1.432510 | 1.509950  | 1.884090  | F | 1.858710  | -1.298670 | -2.020340 |
| F | 0.532150  | -2.248400 | -1.818350 | F | 4.350600  | -0.621520 | -2.729450 |
| F | 2.845150  | -3.485120 | -2.396840 | F | 5.501610  | 1.624470  | -1.703400 |
| F | 5.188630  | -2.504790 | -1.435650 | F | 4.105140  | 3.181930  | 0.035120  |
| F | 5.202100  | -0.266200 | 0.099710  | F | 1.621930  | 2.543500  | 0.731160  |
| F | 2.915560  | 0.991180  | 0.663740  | F | -0.252990 | 2.704590  | -1.332570 |
| F | 1.738560  | 2.095370  | -1.575950 | F | -1.835010 | 4.654210  | -0.417850 |
| F | 1.827230  | 4.707630  | -1.044400 | F | -3.342380 | 4.260860  | 1.814600  |
| F | 0.288790  | 5.749270  | 0.946710  | F | -3.244610 | 1.861350  | 3.100630  |
| F | -1.328780 | 4.113900  | 2.392210  | O | -5.433200 | -2.270340 | -2.663480 |
| O | -5.808630 | 0.096240  | -2.623780 | H | -2.263920 | -1.114890 | 0.266410  |
| H | -2.465670 | 0.749150  | 0.224350  | H | -4.505400 | -2.021960 | -0.321010 |
| H | -4.904190 | 0.682830  | -0.362110 | H | -3.695390 | -1.434390 | -4.519140 |
| H | -3.951310 | -0.373470 | -4.478930 | H | -1.444530 | -0.507750 | -3.945290 |
| H | -1.499730 | -0.285290 | -3.932280 | H | -5.630650 | -2.308100 | -3.609250 |
| H | -6.072500 | -0.127370 | -3.534110 |   |           |           |           |

47

[H-Q-B(C<sub>6</sub>F<sub>5</sub>)<sub>3</sub>]<sup>-</sup>

|   |           |           |           |
|---|-----------|-----------|-----------|
| C | -2.589960 | -1.171780 | -0.765650 |
| C | -3.817050 | -1.675140 | -1.083170 |
| C | -4.223280 | -1.768880 | -2.439410 |
| C | -3.367820 | -1.348840 | -3.487040 |
| C | -2.137990 | -0.841790 | -3.182200 |
| C | -1.708970 | -0.728570 | -1.814830 |
| O | -0.546850 | -0.235490 | -1.623410 |
| B | 0.117170  | 0.088900  | -0.249790 |
| C | 0.337150  | -1.267430 | 0.628950  |
| C | -0.858680 | 1.224000  | 0.405010  |
| C | 1.603970  | 0.611280  | -0.648810 |
| C | 0.855270  | -1.118280 | 1.913660  |
| C | 1.208550  | -2.180710 | 2.729170  |
| C | 1.061790  | -3.477010 | 2.249170  |
| C | 0.565760  | -3.677860 | 0.971570  |
| C | 0.225530  | -2.579270 | 0.187930  |
| C | -1.659500 | 1.074510  | 1.530760  |
| C | -2.492710 | 2.074000  | 2.021530  |
| C | -2.548100 | 3.293920  | 1.366860  |
| C | -1.779430 | 3.490540  | 0.227210  |

47

[H-Q-B(C<sub>6</sub>F<sub>5</sub>)<sub>3</sub>]<sup>-</sup>

|   |           |           |           |
|---|-----------|-----------|-----------|
| C | -2.495990 | -1.411520 | -0.808820 |
| C | -3.756200 | -1.934300 | -1.080460 |
| C | -4.294320 | -1.854350 | -2.360250 |
| C | -3.557800 | -1.245010 | -3.372900 |
| C | -2.300690 | -0.718080 | -3.102630 |
| C | -1.746640 | -0.788830 | -1.818970 |
| O | -0.523270 | -0.263890 | -1.651790 |
| B | 0.073950  | 0.043150  | -0.343560 |
| C | 0.537450  | -1.288930 | 0.517670  |
| C | -0.972590 | 1.030320  | 0.471980  |
| C | 1.511500  | 0.782050  | -0.686420 |
| C | 1.104780  | -1.117440 | 1.776880  |
| C | 1.636950  | -2.147640 | 2.535260  |
| C | 1.630510  | -3.435410 | 2.016010  |
| C | 1.093690  | -3.657600 | 0.759600  |
| C | 0.569100  | -2.590520 | 0.032290  |
| C | -1.693710 | 0.727380  | 1.618400  |
| C | -2.631350 | 1.580920  | 2.191970  |
| C | -2.882310 | 2.808110  | 1.604220  |
| C | -2.194320 | 3.159150  | 0.451690  |
| C | -1.272260 | 2.272230  | -0.083680 |

|   |           |           |           |   |          |          |          |
|---|-----------|-----------|-----------|---|----------|----------|----------|
| C | 2.368130  | 0.159200  | -1.593060 | C | 0.74687  | -2.31036 | 2.17225  |
| C | 3.611510  | 0.665230  | -1.950350 | C | 0.94108  | -3.66431 | 2.41224  |
| C | 4.057530  | 1.843220  | -1.370990 | C | 0.21462  | -4.60840 | 1.68546  |
| C | 3.254540  | 2.485460  | -0.443690 | C | -0.71843 | -4.19587 | 0.73510  |
| C | 2.014730  | 1.945120  | -0.115940 | C | -0.92913 | -2.83771 | 0.52060  |
| F | 1.149800  | 0.114420  | 2.311930  | C | -1.87530 | 1.05965  | -0.67717 |
| F | 2.161590  | -1.922740 | 3.745990  | C | -3.06712 | 1.47234  | -1.24381 |
| F | 2.140050  | -4.449410 | 2.723710  | C | -4.26035 | 0.96169  | -0.74125 |
| F | 1.092090  | -4.896500 | 0.253040  | C | -4.23888 | 0.04301  | 0.30162  |
| F | 0.083030  | -2.897050 | -1.175220 | C | -3.01834 | -0.36321 | 0.82622  |
| F | -1.547070 | -0.457840 | 2.239450  | F | -0.72689 | 2.45623  | 1.69485  |
| F | 2.028440  | -1.009330 | -2.152230 | F | 1.19522  | 4.29759  | 1.58112  |
| F | 4.389850  | 0.025040  | -2.831620 | F | 3.70192  | 3.61111  | 0.78536  |
| F | 5.252390  | 2.347590  | -1.697130 | F | 4.25763  | 0.99930  | 0.15653  |
| F | 3.681640  | 3.617200  | 0.129650  | F | 2.43645  | -0.85389 | 0.47784  |
| F | 1.317570  | 2.630080  | 0.802650  | F | -0.74348 | 1.57374  | -1.19806 |
| F | -0.632260 | 2.681410  | -1.187940 | F | -3.08125 | 2.33886  | -2.24812 |
| F | -2.427640 | 4.345320  | -0.122440 | F | -5.41083 | 1.34836  | -1.25871 |
| F | -3.778890 | 3.644350  | 2.136900  | F | -5.37524 | -0.43616 | 0.78370  |
| F | -3.298470 | 1.223680  | 3.295910  | F | -3.04857 | -1.23467 | 1.83170  |
| O | -5.544990 | -2.388210 | -2.573170 | H | 1.31838  | -1.58228 | 2.74240  |
| H | -2.092060 | -1.494400 | 0.194140  | H | 1.65195  | -3.98830 | 3.16479  |
| H | -4.336320 | -2.415060 | -0.299580 | H | 0.36756  | -5.66697 | 1.86999  |
| H | -3.969170 | -1.178190 | -4.378870 | H | -1.29543 | -4.93140 | 0.18370  |
| H | -1.716650 | -0.237500 | -3.880090 | H | -1.66796 | -2.52111 | -0.21252 |
| H | -5.771820 | -2.252470 | -3.498800 |   |          |          |          |

47

[H-Q-B(C<sub>6</sub>F<sub>5</sub>)<sub>2</sub>Ph]<sup>+</sup>

|   |          |          |          |
|---|----------|----------|----------|
| C | 1.13301  | -2.49734 | -2.01314 |
| C | 2.46268  | -2.53374 | -1.82463 |
| C | 3.19809  | -1.28907 | -1.85034 |
| C | 2.61196  | -0.03530 | -2.27733 |
| C | 1.28998  | 0.01219  | -2.50921 |
| C | 0.44380  | -1.20848 | -2.32152 |
| O | -0.76104 | -1.14060 | -2.41342 |
| O | 4.42652  | -1.35575 | -1.48139 |
| H | 0.50435  | -3.37793 | -1.93168 |
| H | 3.00930  | -3.43364 | -1.56566 |
| H | 3.25431  | 0.83600  | -2.37222 |
| H | 0.77187  | 0.91656  | -2.80960 |
| H | 4.84929  | -0.48217 | -1.37781 |
| B | -0.42703 | -0.35846 | 0.94930  |
| C | 0.73714  | 0.70242  | 1.09916  |
| C | -0.19240 | -1.86385 | 1.22448  |
| C | -1.79558 | 0.12736  | 0.35900  |
| C | 0.49630  | 2.05519  | 1.37343  |
| C | 1.47889  | 3.03562  | 1.30947  |
| C | 2.76738  | 2.68902  | 0.91109  |
| C | 3.04857  | 1.36041  | 0.62919  |
| C | 2.05901  | 0.40375  | 0.77655  |

47

[H-Q-B(C<sub>6</sub>F<sub>5</sub>)<sub>2</sub>Ph]<sup>-</sup>

|   |           |           |           |
|---|-----------|-----------|-----------|
| C | 3.054140  | -0.485670 | -0.008890 |
| C | 4.405520  | -0.615360 | -0.135200 |
| C | 4.955910  | -1.288780 | -1.254890 |
| C | 4.121410  | -1.832710 | -2.260910 |
| C | 2.766600  | -1.710960 | -2.144140 |
| C | 2.184030  | -1.042690 | -1.012330 |
| O | 0.911100  | -0.976180 | -0.981970 |
| O | 6.282840  | -1.374130 | -1.306420 |
| H | 2.614540  | 0.025220  | 0.838480  |
| H | 5.089300  | -0.209100 | 0.601070  |
| H | 4.564320  | -2.338030 | -3.114480 |
| H | 2.084620  | -2.105470 | -2.888510 |
| H | 6.573240  | -1.840880 | -2.101510 |
| B | 0.006210  | -0.433390 | 0.185700  |
| C | 0.134380  | 1.192510  | 0.290850  |
| C | 0.468690  | -1.252190 | 1.503460  |
| C | -1.491830 | -0.774360 | -0.351690 |
| C | -0.690910 | 1.833430  | 1.214970  |
| C | -0.748310 | 3.210380  | 1.374380  |
| C | 0.036730  | 4.018150  | 0.561980  |
| C | 0.858120  | 3.431500  | -0.387100 |
| C | 0.883310  | 2.045990  | -0.509950 |
| C | 0.838240  | -0.656660 | 2.713770  |

|   |           |           |           |   |           |           |           |
|---|-----------|-----------|-----------|---|-----------|-----------|-----------|
| C | 1.277770  | -1.415870 | 3.797780  | C | -3.596980 | -1.342200 | -1.604900 |
| C | 1.357050  | -2.800380 | 3.694040  | C | -3.505920 | -1.556530 | -0.238480 |
| C | 0.992560  | -3.418900 | 2.499490  | C | -2.331010 | -1.228910 | 0.427680  |
| C | 0.556890  | -2.650460 | 1.425690  | C | 1.054980  | -1.359760 | 2.965040  |
| C | -1.850690 | -0.415680 | -1.649270 | C | 1.464970  | -2.398250 | 3.797590  |
| C | -3.109920 | -0.638080 | -2.187030 | C | 1.339490  | -3.721250 | 3.379660  |
| C | -4.084920 | -1.229030 | -1.394840 | C | 0.800660  | -3.987930 | 2.123680  |
| C | -3.784120 | -1.577460 | -0.087370 | C | 0.395320  | -2.940330 | 1.299200  |
| C | -2.506690 | -1.340710 | 0.412890  | F | 1.141670  | -1.932260 | -1.491410 |
| F | -1.486640 | 1.098400  | 2.003810  | F | 3.468360  | -1.644690 | -2.764650 |
| F | -1.548830 | 3.762740  | 2.283880  | F | 5.158440  | 0.390690  | -2.102310 |
| F | 0.000220  | 5.341140  | 0.694200  | F | 4.454020  | 2.132590  | -0.129460 |
| F | 1.612410  | 4.195190  | -1.178080 | F | 2.154010  | 1.870180  | 1.154760  |
| F | 1.699700  | 1.564170  | -1.466390 | F | -0.378940 | 0.073060  | -2.298800 |
| F | -0.955730 | 0.195830  | -2.442440 | F | -2.332310 | -1.448530 | 1.747460  |
| F | -3.395250 | -0.283690 | -3.441240 | F | -4.551940 | -2.071540 | 0.419910  |
| F | -5.301760 | -1.451670 | -1.886210 | F | -4.719350 | -1.647670 | -2.265080 |
| F | -4.722110 | -2.132410 | 0.680590  | F | -2.596290 | -0.568110 | -3.591380 |
| F | -2.302240 | -1.682730 | 1.687100  | H | 1.146950  | -0.328770 | 3.297090  |
| H | 0.789540  | 0.424500  | 2.819570  | H | 1.882080  | -2.176550 | 4.777100  |
| H | 1.555090  | -0.923280 | 4.725000  | H | 1.656360  | -4.535260 | 4.026230  |
| H | 1.695950  | -3.394500 | 4.536990  | H | 0.693160  | -5.015870 | 1.786140  |
| H | 1.043000  | -4.500020 | 2.409550  | H | -0.023980 | -3.167700 | 0.321670  |
| H | 0.265930  | -3.147730 | 0.501430  |   |           |           |           |

47

47

[H-Q-B(C<sub>6</sub>F<sub>5</sub>)<sub>2</sub>Ph]<sup>-</sup>

|   |           |           |           |
|---|-----------|-----------|-----------|
| C | -0.648640 | 2.448670  | -0.061010 |
| C | -1.121600 | 3.720570  | -0.370030 |
| C | -1.639160 | 4.544720  | 0.622690  |
| C | -1.679810 | 4.085060  | 1.936860  |
| C | -1.210710 | 2.815000  | 2.247740  |
| C | -0.687560 | 1.971250  | 1.258610  |
| O | -0.250250 | 0.768930  | 1.652020  |
| O | -2.094100 | 5.793540  | 0.261010  |
| H | -0.240980 | 1.827890  | -0.850060 |
| H | -1.091370 | 4.089000  | -1.390370 |
| H | -2.082860 | 4.722150  | 2.722850  |
| H | -1.239470 | 2.442230  | 3.266140  |
| H | -2.414010 | 6.232890  | 1.055500  |
| B | 0.113190  | -0.340070 | 0.746160  |
| C | 1.494080  | -0.029680 | -0.124220 |
| C | -1.202910 | -0.700520 | -0.200680 |
| C | 0.508630  | -1.602370 | 1.697730  |
| C | 1.920930  | -0.899020 | -1.124800 |
| C | 3.124480  | -0.778730 | -1.802520 |
| C | 3.988040  | 0.254040  | -1.467740 |
| C | 3.623410  | 1.137360  | -0.466760 |
| C | 2.402800  | 0.977540  | 0.185540  |
| C | -1.358440 | -0.489230 | -1.565860 |
| C | -2.514410 | -0.798310 | -2.274840 |

[H-Q-B(C<sub>6</sub>F<sub>5</sub>)Ph<sub>2</sub>]<sup>+</sup>

|   |          |          |          |
|---|----------|----------|----------|
| C | -3.20304 | 0.08668  | -0.20690 |
| C | -4.45376 | 0.59428  | -0.19136 |
| C | -4.85771 | 1.49155  | -1.23401 |
| C | -3.99078 | 1.88542  | -2.32644 |
| C | -2.74596 | 1.38348  | -2.37324 |
| C | -2.26394 | 0.43374  | -1.32160 |
| O | -1.15273 | -0.03509 | -1.39765 |
| O | -6.06496 | 1.94139  | -1.14832 |
| H | -2.84597 | -0.60872 | 0.54864  |
| H | -5.17451 | 0.36500  | 0.58580  |
| H | -4.36843 | 2.57164  | -3.07969 |
| H | -2.04091 | 1.62644  | -3.16253 |
| H | -6.32026 | 2.54667  | -1.86622 |
| B | 0.63262  | -0.94348 | 0.66556  |
| C | 0.72796  | -2.37552 | 0.07132  |
| C | -0.53726 | -0.50894 | 1.62104  |
| C | 1.73344  | 0.12110  | 0.29012  |
| C | 1.98351  | -2.93166 | -0.23181 |
| C | 2.10188  | -4.21806 | -0.74400 |
| C | 0.95718  | -4.97002 | -0.99880 |
| C | -0.30229 | -4.43536 | -0.73330 |
| C | -0.40915 | -3.15883 | -0.19494 |
| C | -1.27451 | -1.44481 | 2.36536  |
| C | -2.36799 | -1.05880 | 3.14507  |
| C | -2.74909 | 0.27955  | 3.19435  |

|   |          |          |          |
|---|----------|----------|----------|
| C | -2.02112 | 1.23459  | 2.47903  |
| C | -0.92552 | 0.84059  | 1.71423  |
| C | 2.18445  | 0.28263  | -1.02247 |
| C | 3.14847  | 1.21779  | -1.37403 |
| C | 3.71133  | 2.01796  | -0.38690 |
| C | 3.29941  | 1.88639  | 0.93442  |
| C | 2.32085  | 0.95288  | 1.24602  |
| F | 1.66333  | -0.45028 | -2.00813 |
| F | 3.53198  | 1.35783  | -2.63838 |
| F | 4.63452  | 2.91007  | -0.70602 |
| F | 3.84025  | 2.64927  | 1.87614  |
| F | 1.95771  | 0.85278  | 2.52688  |
| H | 2.88186  | -2.34787 | -0.04839 |
| H | 3.08234  | -4.63224 | -0.95357 |
| H | 1.04560  | -5.97104 | -1.40851 |
| H | -1.19392 | -5.01719 | -0.94305 |
| H | -1.39754 | -2.75164 | 0.00620  |
| H | -0.98154 | -2.49028 | 2.34179  |
| H | -2.91127 | -1.80077 | 3.72128  |
| H | -3.59168 | 0.58399  | 3.80749  |
| H | -2.29542 | 2.28350  | 2.53929  |
| H | -0.35825 | 1.59276  | 1.16995  |

47

[H-Q-B(C<sub>6</sub>F<sub>5</sub>)Ph<sub>2</sub>]<sup>-</sup>

|   |           |           |           |
|---|-----------|-----------|-----------|
| C | 2.401250  | 0.767170  | 0.334000  |
| C | 3.606280  | 1.370790  | 0.543220  |
| C | 4.629580  | 1.277360  | -0.432830 |
| C | 4.422350  | 0.568550  | -1.640000 |
| C | 3.219190  | -0.038450 | -1.861450 |
| C | 2.169390  | 0.028990  | -0.880770 |
| O | 1.078970  | -0.564640 | -1.164930 |
| O | 5.778570  | 1.890830  | -0.154370 |
| H | 1.605210  | 0.830010  | 1.064850  |
| H | 3.812830  | 1.936300  | 1.444520  |
| H | 5.218570  | 0.514290  | -2.377120 |
| H | 3.010850  | -0.593480 | -2.768920 |
| H | 6.415570  | 1.781030  | -0.872810 |
| B | -0.169200 | -0.824080 | -0.214080 |
| C | -0.945930 | 0.598160  | 0.037020  |
| C | 0.434790  | -1.518260 | 1.120940  |
| C | -1.103360 | -1.788690 | -1.108040 |
| C | -2.093030 | 0.571450  | 0.831780  |
| C | -2.894070 | 1.678890  | 1.071430  |
| C | -2.567790 | 2.893300  | 0.482490  |
| C | -1.448240 | 2.970860  | -0.328980 |
| C | -0.673730 | 1.834090  | -0.538210 |
| C | 0.303320  | -1.009200 | 2.418510  |
| C | 0.877080  | -1.644690 | 3.518910  |
| C | 1.604480  | -2.817830 | 3.345080  |
| C | 1.748470  | -3.349960 | 2.065360  |

|   |           |           |           |
|---|-----------|-----------|-----------|
| C | 1.167870  | -2.707000 | 0.976240  |
| C | -1.291120 | -1.520430 | -2.471150 |
| C | -2.115230 | -2.311310 | -3.265540 |
| C | -2.786490 | -3.395980 | -2.704310 |
| C | -2.624750 | -3.675960 | -1.350920 |
| C | -1.791740 | -2.879810 | -0.566370 |
| F | -2.466360 | -0.574730 | 1.414630  |
| F | -3.970840 | 1.589640  | 1.850980  |
| F | -3.320710 | 3.969780  | 0.697060  |
| F | -1.121910 | 4.129240  | -0.905350 |
| F | 0.388030  | 2.005290  | -1.353650 |
| H | -0.257860 | -0.090890 | 2.580610  |
| H | 0.751500  | -1.224810 | 4.512640  |
| H | 2.050960  | -3.317130 | 4.199520  |
| H | 2.307150  | -4.269870 | 1.919130  |
| H | 1.271400  | -3.141800 | -0.016360 |
| H | -0.775980 | -0.671890 | -2.918940 |
| H | -2.238550 | -2.082350 | -4.320250 |
| H | -3.432480 | -4.016190 | -3.318450 |
| H | -3.146860 | -4.517250 | -0.904470 |
| H | -1.672210 | -3.110010 | 0.489330  |

47

[H-Q-B(C<sub>6</sub>F<sub>5</sub>)Ph<sub>2</sub>]<sup>-</sup>

|   |           |           |           |
|---|-----------|-----------|-----------|
| C | 2.417740  | 0.812680  | 0.300970  |
| C | 3.640380  | 1.420630  | 0.562680  |
| C | 4.693230  | 1.310400  | -0.339520 |
| C | 4.510650  | 0.583890  | -1.512620 |
| C | 3.289390  | -0.026740 | -1.774050 |
| C | 2.218030  | 0.071200  | -0.875510 |
| O | 1.074670  | -0.530380 | -1.215340 |
| O | 5.884710  | 1.932770  | -0.031100 |
| H | 1.607150  | 0.909260  | 1.013580  |
| H | 3.792060  | 1.991300  | 1.473350  |
| H | 5.327770  | 0.492000  | -2.227120 |
| H | 3.134390  | -0.596930 | -2.684140 |
| H | 6.500050  | 1.759630  | -0.750720 |
| B | -0.069670 | -0.788060 | -0.292820 |
| C | -0.923920 | 0.608320  | 0.041450  |
| C | 0.463750  | -1.551330 | 1.052360  |
| C | -1.088770 | -1.732290 | -1.155270 |
| C | -2.039550 | 0.566240  | 0.876750  |
| C | -2.859200 | 1.654660  | 1.145560  |
| C | -2.589240 | 2.871400  | 0.538850  |
| C | -1.507300 | 2.966700  | -0.319360 |
| C | -0.710540 | 1.848800  | -0.555540 |
| C | 0.333520  | -1.107550 | 2.373270  |
| C | 0.848480  | -1.825400 | 3.452680  |
| C | 1.518950  | -3.024900 | 3.236540  |
| C | 1.671460  | -3.491280 | 1.931820  |
| C | 1.151400  | -2.761710 | 0.867250  |

|   |           |           |           |
|---|-----------|-----------|-----------|
| C | -1.192540 | -1.552790 | -2.542490 |
| C | -2.064760 | -2.310290 | -3.320160 |
| C | -2.868830 | -3.280030 | -2.723900 |
| C | -2.784800 | -3.479370 | -1.348510 |
| C | -1.906540 | -2.714500 | -0.581720 |
| F | -2.385970 | -0.581890 | 1.483750  |
| F | -3.909090 | 1.544230  | 1.970940  |
| F | -3.365540 | 3.936110  | 0.776650  |
| F | -1.244020 | 4.135240  | -0.919960 |
| F | 0.295370  | 2.047910  | -1.419430 |
| H | -0.176690 | -0.166390 | 2.571380  |
| H | 0.726890  | -1.445170 | 4.464030  |
| H | 1.921460  | -3.589180 | 4.073640  |
| H | 2.197320  | -4.424880 | 1.747060  |
| H | 1.276250  | -3.132550 | -0.148470 |
| H | -0.558380 | -0.804680 | -3.012490 |
| H | -2.118080 | -2.147400 | -4.394260 |
| H | -3.550860 | -3.875400 | -3.325600 |
| H | -3.402930 | -4.236280 | -0.871380 |
| H | -1.845770 | -2.886920 | 0.490190  |

47

[H-Q-BPh<sub>3</sub>]<sup>+</sup>

|   |          |          |          |
|---|----------|----------|----------|
| C | -2.07923 | 1.24862  | 1.62690  |
| C | -3.41036 | 1.25818  | 1.40578  |
| C | -4.04542 | 0.04659  | 0.97218  |
| C | -3.32944 | -1.18022 | 0.73245  |
| C | -2.00365 | -1.22520 | 0.97302  |
| C | -1.30560 | -0.02876 | 1.54440  |
| O | -0.18213 | -0.10761 | 1.98416  |
| O | -5.32484 | 0.12577  | 0.78434  |
| H | -1.52783 | 2.12771  | 1.94559  |
| H | -4.02844 | 2.14279  | 1.51042  |
| H | -3.86955 | -2.04406 | 0.35424  |
| H | -1.40831 | -2.12303 | 0.82142  |
| H | -5.73128 | -0.70669 | 0.48912  |
| B | 1.25087  | -0.00868 | -0.64126 |
| C | 2.64570  | 0.07356  | 0.04656  |
| C | 0.47881  | 1.31926  | -0.99734 |
| C | 0.60209  | -1.41853 | -0.89859 |
| C | 3.66055  | -0.85283 | -0.26049 |
| C | 4.91130  | -0.77990 | 0.34079  |
| C | 5.16462  | 0.20206  | 1.29774  |
| C | 4.17106  | 1.11719  | 1.63953  |
| C | 2.93392  | 1.06130  | 1.00787  |
| C | 1.18695  | 2.51553  | -1.20415 |
| C | 0.53652  | 3.71384  | -1.49704 |
| C | -0.85283 | 3.75463  | -1.57608 |
| C | -1.58585 | 2.58653  | -1.37884 |
| C | -0.92286 | 1.38801  | -1.11495 |
| C | 0.92051  | -2.49380 | -0.04533 |

|   |          |          |          |
|---|----------|----------|----------|
| C | 0.29712  | -3.73360 | -0.17044 |
| C | -0.66006 | -3.93316 | -1.16682 |
| C | -0.97715 | -2.89461 | -2.04132 |
| C | -0.35176 | -1.65636 | -1.90572 |
| H | 3.46692  | -1.63027 | -0.99521 |
| H | 5.68687  | -1.48934 | 0.07190  |
| H | 6.13650  | 0.25247  | 1.77809  |
| H | 4.36582  | 1.87515  | 2.39104  |
| H | 2.16614  | 1.78290  | 1.27527  |
| H | 2.27081  | 2.50321  | -1.14305 |
| H | 1.11540  | 4.61736  | -1.65736 |
| H | -1.36068 | 4.68757  | -1.79737 |
| H | -2.66961 | 2.60699  | -1.45430 |
| H | -1.50821 | 0.47384  | -1.03202 |
| H | 1.65338  | -2.34237 | 0.74177  |
| H | 0.56165  | -4.54519 | 0.49991  |
| H | -1.13952 | -4.90120 | -1.27434 |
| H | -1.69561 | -3.05631 | -2.83884 |
| H | -0.59281 | -0.86334 | -2.60867 |

47

[H-Q-BPh<sub>3</sub>]<sup>-</sup>

|   |           |           |           |
|---|-----------|-----------|-----------|
| C | 2.311690  | 0.195510  | 0.208220  |
| C | 3.676290  | 0.241500  | 0.250310  |
| C | 4.430330  | 0.196350  | -0.946250 |
| C | 3.791590  | 0.116010  | -2.205700 |
| C | 2.426850  | 0.075620  | -2.263470 |
| C | 1.637140  | 0.103480  | -1.061820 |
| O | 0.370030  | 0.061730  | -1.206570 |
| O | 5.757920  | 0.238920  | -0.821810 |
| H | 1.717050  | 0.233380  | 1.111800  |
| H | 4.213390  | 0.314970  | 1.188900  |
| H | 4.388840  | 0.087680  | -3.112880 |
| H | 1.891260  | 0.012650  | -3.203930 |
| H | 6.188060  | 0.202730  | -1.686170 |
| B | -0.740500 | -0.028920 | -0.065680 |
| C | -0.823230 | 1.432770  | 0.636030  |
| C | -0.302230 | -1.245920 | 0.918310  |
| C | -2.090280 | -0.335270 | -0.901760 |
| C | -1.843270 | 1.643900  | 1.580030  |
| C | -1.994090 | 2.857360  | 2.240530  |
| C | -1.132590 | 3.918080  | 1.959990  |
| C | -0.132290 | 3.746820  | 1.011450  |
| C | 0.013810  | 2.519720  | 0.361030  |
| C | -0.196060 | -1.133590 | 2.310550  |
| C | 0.190760  | -2.212520 | 3.106490  |
| C | 0.487740  | -3.440060 | 2.523480  |
| C | 0.386500  | -3.581890 | 1.140440  |
| C | -0.007250 | -2.500350 | 0.358530  |
| C | -2.399490 | 0.424680  | -2.039570 |
| C | -3.568450 | 0.219350  | -2.763710 |

|   |           |           |           |
|---|-----------|-----------|-----------|
| C | -4.478240 | -0.754730 | -2.353470 |
| C | -4.202330 | -1.513460 | -1.221350 |
| C | -3.019520 | -1.305510 | -0.510500 |
| H | -2.536990 | 0.832070  | 1.791510  |
| H | -2.789420 | 2.981830  | 2.969680  |
| H | -1.250110 | 4.869820  | 2.468820  |
| H | 0.533940  | 4.569890  | 0.768720  |
| H | 0.795490  | 2.432700  | -0.391220 |
| H | -0.413640 | -0.179030 | 2.784550  |
| H | 0.261090  | -2.091940 | 4.183820  |
| H | 0.790440  | -4.281250 | 3.139680  |
| H | 0.607410  | -4.538310 | 0.674990  |
| H | -0.102280 | -2.629970 | -0.718570 |
| H | -1.704580 | 1.199520  | -2.359160 |
| H | -3.777860 | 0.821370  | -3.643570 |
| H | -5.395440 | -0.916600 | -2.911910 |
| H | -4.905650 | -2.273120 | -0.891970 |
| H | -2.812490 | -1.916020 | 0.365590  |

47

[H-Q-BPh<sub>3</sub>]<sup>-</sup>

|   |           |           |           |
|---|-----------|-----------|-----------|
| C | 2.340940  | 0.323670  | 0.227140  |
| C | 3.726280  | 0.358960  | 0.340980  |
| C | 4.535820  | 0.179720  | -0.776040 |
| C | 3.943590  | -0.035670 | -2.016910 |
| C | 2.558580  | -0.074790 | -2.133670 |
| C | 1.724200  | 0.103140  | -1.018700 |
| O | 0.407070  | 0.071420  | -1.225280 |
| O | 5.904740  | 0.226400  | -0.606170 |
| H | 1.723320  | 0.470540  | 1.104980  |
| H | 4.197490  | 0.527950  | 1.304120  |
| H | 4.567120  | -0.176850 | -2.899140 |
| H | 2.085170  | -0.245720 | -3.095170 |
| H | 6.310340  | 0.065350  | -1.464080 |
| B | -0.644870 | 0.002450  | -0.143400 |
| C | -0.840590 | 1.460070  | 0.575640  |
| C | -0.298270 | -1.218900 | 0.897260  |
| C | -2.032840 | -0.344980 | -0.939370 |
| C | -1.836070 | 1.671090  | 1.544750  |
| C | -2.048360 | 2.912550  | 2.138030  |
| C | -1.267270 | 4.005730  | 1.766790  |
| C | -0.286750 | 3.834860  | 0.793930  |
| C | -0.084720 | 2.583370  | 0.211750  |
| C | -0.287190 | -1.131090 | 2.294920  |
| C | -0.005820 | -2.233050 | 3.105790  |
| C | 0.282900  | -3.466930 | 2.533390  |
| C | 0.288500  | -3.584510 | 1.143340  |
| C | -0.000100 | -2.478940 | 0.350620  |
| C | -2.232420 | 0.100980  | -2.254350 |
| C | -3.421410 | -0.131560 | -2.941130 |
| C | -4.463030 | -0.822880 | -2.324390 |

|   |           |           |           |
|---|-----------|-----------|-----------|
| C | -4.292750 | -1.279810 | -1.020330 |
| C | -3.093710 | -1.045190 | -0.348110 |
| H | -2.473270 | 0.835040  | 1.830660  |
| H | -2.829010 | 3.031540  | 2.885980  |
| H | -1.427390 | 4.978440  | 2.224710  |
| H | 0.323660  | 4.680500  | 0.485180  |
| H | 0.680750  | 2.472540  | -0.552410 |
| H | -0.491670 | -0.171900 | 2.766220  |
| H | -0.006530 | -2.123560 | 4.188010  |
| H | 0.504980  | -4.327090 | 3.159800  |
| H | 0.518330  | -4.541810 | 0.681190  |
| H | 0.005170  | -2.579420 | -0.733410 |
| H | -1.421430 | 0.636040  | -2.742230 |
| H | -3.539460 | 0.226550  | -3.961700 |
| H | -5.393390 | -1.006930 | -2.855820 |
| H | -5.092910 | -1.828790 | -0.528730 |
| H | -2.968530 | -1.432180 | 0.662320  |

35

[H-Q-BEt<sub>3</sub>]<sup>+</sup>

|   |          |          |          |
|---|----------|----------|----------|
| C | 1.34661  | -0.53294 | 0.53092  |
| C | 2.56159  | -1.08081 | 0.71487  |
| C | 3.72374  | -0.37972 | 0.22498  |
| C | 3.65563  | 0.89383  | -0.45897 |
| C | 2.45047  | 1.45928  | -0.64544 |
| C | 1.21006  | 0.78524  | -0.15406 |
| O | 0.14308  | 1.30631  | -0.30434 |
| O | 4.84915  | -0.96783 | 0.43437  |
| H | 0.42494  | -1.00706 | 0.85782  |
| H | 2.72300  | -2.03164 | 1.21123  |
| H | 4.57523  | 1.36107  | -0.80066 |
| H | 2.31802  | 2.41489  | -1.14424 |
| H | 5.62819  | -0.48937 | 0.09796  |
| B | -2.12635 | -0.08306 | -0.25337 |
| C | -1.60591 | -0.96808 | -1.46035 |
| C | -2.08910 | -0.67577 | 1.21970  |
| C | -2.89000 | 1.26838  | -0.52838 |
| C | -2.85306 | 2.32259  | 0.58387  |
| C | -3.51965 | -0.97591 | 1.71798  |
| C | -2.68561 | -2.03203 | -1.75808 |
| H | -1.41617 | -0.38217 | -2.36675 |
| H | -0.67326 | -1.50047 | -1.21350 |
| H | -1.50903 | -1.60844 | 1.28694  |
| H | -1.62945 | 0.04802  | 1.90914  |
| H | -3.93831 | 0.96820  | -0.70311 |
| H | -2.57002 | 1.71018  | -1.47959 |
| H | -3.44991 | 3.20195  | 0.33051  |
| H | -1.82751 | 2.66358  | 0.76220  |
| H | -3.23247 | 1.92965  | 1.53138  |
| H | -4.01991 | -1.70014 | 1.06853  |
| H | -4.13296 | -0.07159 | 1.73038  |



|   |          |          |          |
|---|----------|----------|----------|
| H | -3.51225 | -1.38973 | 2.72898  |
| H | -2.40406 | -2.66072 | -2.60608 |
| H | -2.84379 | -2.68793 | -0.89648 |
| H | -3.64501 | -1.56525 | -2.00027 |

35

[H-BQ-BE<sub>3</sub>]<sup>-</sup>

|   |           |           |           |
|---|-----------|-----------|-----------|
| C | 1.257290  | -0.843840 | -0.289040 |
| C | 2.599220  | -1.036420 | -0.489280 |
| C | 3.511330  | 0.013040  | -0.251770 |
| C | 3.059360  | 1.271520  | 0.194950  |
| C | 1.718670  | 1.475100  | 0.395440  |
| C | 0.772490  | 0.427530  | 0.159460  |
| O | -0.463680 | 0.704650  | 0.364240  |
| O | 4.807210  | -0.250110 | -0.468300 |
| H | 0.545320  | -1.640220 | -0.459000 |
| H | 2.992180  | -1.988390 | -0.827490 |
| H | 3.774410  | 2.069880  | 0.373950  |
| H | 1.328580  | 2.428380  | 0.733860  |
| H | 5.348730  | 0.525780  | -0.276220 |
| B | -1.759010 | -0.135390 | 0.100530  |
| C | -1.840240 | -0.210340 | -1.548990 |
| C | -1.663790 | -1.622870 | 0.784260  |
| C | -2.930540 | 0.772970  | 0.757310  |
| C | -3.086400 | 2.167320  | 0.145370  |
| C | -0.987460 | -1.663080 | 2.157760  |
| C | -3.143370 | -0.859990 | -2.009850 |
| H | -1.757560 | 0.798040  | -1.974500 |
| H | -0.983690 | -0.783060 | -1.935450 |
| H | -1.214550 | -2.382940 | 0.126770  |
| H | -2.706490 | -1.947850 | 0.903090  |
| H | -3.883630 | 0.232630  | 0.671980  |
| H | -2.753100 | 0.873030  | 1.838600  |
| H | -3.821230 | 2.783800  | 0.673870  |
| H | -3.405490 | 2.105610  | -0.901200 |
| H | -2.132620 | 2.707190  | 0.158310  |
| H | -1.058370 | -2.648110 | 2.630880  |
| H | -1.443840 | -0.935360 | 2.836410  |
| H | 0.080100  | -1.415880 | 2.098230  |
| H | -3.198470 | -0.946000 | -3.100890 |

|   |           |           |           |
|---|-----------|-----------|-----------|
| H | -3.254000 | -1.866610 | -1.592850 |
| H | -4.008860 | -0.274870 | -1.682150 |

35

[H-Q-BE<sub>3</sub>]<sup>-</sup>

|   |           |           |           |
|---|-----------|-----------|-----------|
| C | 1.254930  | -0.811690 | -0.266970 |
| C | 2.610680  | -1.018620 | -0.500950 |
| C | 3.536750  | -0.010240 | -0.259010 |
| C | 3.088810  | 1.215810  | 0.225330  |
| C | 1.735340  | 1.427070  | 0.458530  |
| C | 0.774110  | 0.423020  | 0.220360  |
| O | -0.487210 | 0.697970  | 0.490050  |
| O | 4.873380  | -0.267530 | -0.508940 |
| H | 0.546740  | -1.608620 | -0.454330 |
| H | 2.967990  | -1.973680 | -0.875060 |
| H | 3.804300  | 2.015060  | 0.419930  |
| H | 1.378240  | 2.380690  | 0.834470  |
| H | 5.364820  | 0.530060  | -0.288470 |
| B | -1.725610 | -0.125720 | 0.078280  |
| C | -1.781790 | -0.243040 | -1.559850 |
| C | -1.745720 | -1.607650 | 0.810580  |
| C | -2.962760 | 0.782290  | 0.663670  |
| C | -3.052130 | 2.181110  | 0.048700  |
| C | -1.140870 | -1.610160 | 2.218070  |
| C | -3.093550 | -0.845520 | -2.073750 |
| H | -1.645840 | 0.751960  | -2.011710 |
| H | -0.949340 | -0.850210 | -1.947000 |
| H | -1.252030 | -2.392680 | 0.212850  |
| H | -2.794890 | -1.936940 | 0.881410  |
| H | -3.922510 | 0.260910  | 0.521870  |
| H | -2.843430 | 0.885890  | 1.753990  |
| H | -3.806520 | 2.826530  | 0.520770  |
| H | -3.296800 | 2.125280  | -1.019700 |
| H | -2.081420 | 2.682810  | 0.127230  |
| H | -1.246420 | -2.572290 | 2.738680  |
| H | -1.613350 | -0.843450 | 2.842910  |
| H | -0.072330 | -1.369250 | 2.182360  |
| H | -3.123690 | -0.967270 | -3.165500 |
| H | -3.268270 | -1.834220 | -1.630980 |
| H | -3.949320 | -0.219770 | -1.792280 |

## 20) References

1. Scalmani, G.; Frisch, M. J. *J. Chem. Phys.* 2010, **132**, 114110.
2. Marenich, A. V.; Cramer, C. J.; Truhlar, D. G. *J. Phys. Chem. B* 2009, **113**, 6378-6396.
3. Izutsu, K., *Acid-Base Dissociation Constants in Dipolar Aprotic Solvents*. Blackwell Scientific Publications: Oxford, 1990; Vol. 35, p 166 pp.
4. Warren, J. J.; Tronic, T. A.; Mayer, J. M. *Chem. Rev.* 2010, **110**, 6961-7001.
